# Supplementary material for: Microexon gene transcriptional profiles and evolution provide insights into blood processing by the Schistosoma japonicum esophagus
Source: PLoS Negl Trop Dis. 2018 Feb 12;12(2):e0006235. doi: 10.1371/journal.pntd.0006235 (PMC5825161; doi:10.1371/journal.pntd.0006235)
Supplement: S2 Table — (XLSX) [file pntd.0006235.s008.xlsx]

## Sheet: Sheet1
	Annotation/Smp orthologue	gene_FPKM_JFHE	gene_FPKM_JFBE	log2((FPKM_HE+1)/(FPKM_BE+1))	log2(FPKM_HE+FPKM_BE+1)	Trinity gene ID	Descriptions
1	SjMEG-11_h9981_g1_c11140_g1_i1	298942	0	18.1895	18.1895	TRINITY_DN1072_c0_g1; TRINITY_DN11628_c0_g1; TRINITY_DN11628_c0_g2; TRINITY_DN18251_c0_g1; TRINITY_DN18251_c0_g10; TRINITY_DN18251_c0_g11; TRINITY_DN18251_c0_g12; TRINITY_DN18251_c0_g2; TRINITY_DN18251_c0_g3; TRINITY_DN18251_c0_g4; TRINITY_DN18251_c0_g5; TRINITY_DN18251_c0_g6; TRINITY_DN18251_c0_g7; TRINITY_DN18251_c0_g8; TRINITY_DN18251_c0_g9; TRINITY_DN41869_c0_g1; TRINITY_DN8544_c0_g1	-
2	SjMEG-8.2_h12749_g2_i1_OK	55033.5	0	15.748	15.748	TRINITY_DN21054_c0_g1; TRINITY_DN21054_c0_g2; TRINITY_DN21054_c0_g3; TRINITY_DN21054_c0_g4; TRINITY_DN21054_c0_g5; TRINITY_DN35002_c0_g1	-
3	SjMEG-29_h12251_g1_i1	22055.1	0	14.4289	14.4289	TRINITY_DN22757_c3_g1	-
4	SjMEG-9_h13184_g1_i1_FN313838	21055.9	0	14.362	14.362	TRINITY_DN20903_c1_g1; TRINITY_DN20903_c1_g2; TRINITY_DN20903_c1_g3; TRINITY_DN56370_c0_g1	-
5	SjMEG-14_AY814048	14688.4	0	13.8425	13.8425	TRINITY_DN17145_c1_g1; TRINITY_DN17145_c1_g2; TRINITY_DN22801_c1_g1; TRINITY_DN22801_c1_g10; TRINITY_DN22801_c1_g11; TRINITY_DN22801_c1_g12; TRINITY_DN22801_c1_g13; TRINITY_DN22801_c1_g15; TRINITY_DN22801_c1_g16; TRINITY_DN22801_c1_g17; TRINITY_DN22801_c1_g18; TRINITY_DN22801_c1_g19; TRINITY_DN22801_c1_g2; TRINITY_DN22801_c1_g20; TRINITY_DN22801_c1_g21; TRINITY_DN22801_c1_g22; TRINITY_DN22801_c1_…	-
7	SjMEG-4.2_FN314028.1	6041.31	0	12.5609	12.5609	TRINITY_DN22166_c0_g1; TRINITY_DN22166_c0_g2; TRINITY_DN22166_c0_g3; TRINITY_DN22166_c0_g4; TRINITY_DN22166_c0_g5; TRINITY_DN22166_c0_g6; TRINITY_DN22166_c0_g7; TRINITY_DN22166_c0_g8; TRINITY_DN22166_c0_g9	-
8	SjMEG-8.1_AY815443.1	3092.21	0	11.5949	11.5949	TRINITY_DN1166_c0_g1; TRINITY_DN16434_c0_g1; TRINITY_DN16434_c0_g2; TRINITY_DN16434_c0_g3; TRINITY_DN16434_c0_g4; TRINITY_DN16434_c0_g5; TRINITY_DN16434_c0_g6; TRINITY_DN16434_c0_g7; TRINITY_DN16434_c0_g8; TRINITY_DN19223_c0_g1; TRINITY_DN19223_c0_g2; TRINITY_DN19223_c0_g3; TRINITY_DN19223_c0_g4; TRINITY_DN19223_c0_g5; TRINITY_DN36308_c0_g1; TRINITY_DN61931_c0_g1	-
10	SjMEG-15_h12430_g1_i1	2939.35	0	11.5218	11.5218	TRINITY_DN18539_c0_g1; TRINITY_DN38802_c0_g1	-
12	SjMEG-8.3_gi|58557064|gb|CX856644.1=h7049_g1	2451.35	0	11.2599	11.2599	TRINITY_DN21998_c2_g1; TRINITY_DN21998_c2_g2; TRINITY_DN21998_c2_g3; TRINITY_DN21998_c2_g4; TRINITY_DN21998_c2_g5	-
13	SjMEG-n.2	2209.47	0	11.1101	11.1101	TRINITY_DN22754_c2_g7
15	SjMEG-26.6_e103685	2231.04	0.92	10.183	11.1247	TRINITY_DN12510_c0_g1; TRINITY_DN12510_c0_g2; TRINITY_DN12510_c0_g3; TRINITY_DN22052_c0_g12; TRINITY_DN22052_c0_g14; TRINITY_DN22052_c0_g15; TRINITY_DN22052_c0_g19; TRINITY_DN22052_c0_g21; TRINITY_DN22052_c0_g23; TRINITY_DN22052_c0_g26; TRINITY_DN22052_c0_g27; TRINITY_DN22052_c0_g3; TRINITY_DN22052_c0_g30; TRINITY_DN22052_c0_g31; TRINITY_DN22052_c0_g32; TRINITY_DN22052_c0_g4; TRINITY_DN22052_c0_g…	-
16	SjMEG-26.1_h17692_g1_i3	1085.34	0	10.0853	10.0853	TRINITY_DN1141_c0_g1; TRINITY_DN22052_c0_g10; TRINITY_DN22052_c0_g13; TRINITY_DN22052_c0_g2; TRINITY_DN22052_c0_g22; TRINITY_DN22052_c0_g28; TRINITY_DN22052_c0_g29; TRINITY_DN22052_c0_g5	-
17	SjMEG-26.3_e106652_g1	903.63	0	9.82118	9.82118	TRINITY_DN21181_c0_g1; TRINITY_DN21181_c0_g10; TRINITY_DN21181_c0_g11; TRINITY_DN21181_c0_g12; TRINITY_DN21181_c0_g13; TRINITY_DN21181_c0_g14; TRINITY_DN21181_c0_g15; TRINITY_DN21181_c0_g16; TRINITY_DN21181_c0_g2; TRINITY_DN21181_c0_g3; TRINITY_DN21181_c0_g4; TRINITY_DN21181_c0_g5; TRINITY_DN21181_c0_g6; TRINITY_DN21181_c0_g7; TRINITY_DN21181_c0_g8; TRINITY_DN21181_c0_g9	-
19	SjMEG-12_h14702_g1_i1	776.03	0	9.60183	9.60183	TRINITY_DN21479_c0_g1; TRINITY_DN21479_c0_g10; TRINITY_DN21479_c0_g3; TRINITY_DN21479_c0_g4; TRINITY_DN21479_c0_g5; TRINITY_DN21479_c0_g6; TRINITY_DN21479_c0_g8; TRINITY_DN21479_c0_g9	-
21	SjMEG-26.5_e104245_g1_i1	3638.69	4.79	9.3	11.8315	TRINITY_DN20840_c1_g1; TRINITY_DN20840_c1_g2; TRINITY_DN20840_c1_g3; TRINITY_DN22974_c0_g14; TRINITY_DN22974_c0_g15; TRINITY_DN22974_c0_g16; TRINITY_DN22974_c0_g17; TRINITY_DN22974_c0_g18; TRINITY_DN22974_c0_g19; TRINITY_DN22974_c0_g2; TRINITY_DN22974_c0_g20; TRINITY_DN22974_c0_g21; TRINITY_DN22974_c0_g22; TRINITY_DN22974_c0_g23; TRINITY_DN22974_c0_g24; TRINITY_DN22974_c0_g25; TRINITY_DN22974_c0_…
22	SjMEG-4.1_	4686.92	9.35	8.82317	12.1976	TRINITY_DN14550_c0_g2; TRINITY_DN20971_c0_g1; TRINITY_DN20971_c0_g10; TRINITY_DN20971_c0_g11; TRINITY_DN20971_c0_g12; TRINITY_DN20971_c0_g13; TRINITY_DN20971_c0_g14; TRINITY_DN20971_c0_g15; TRINITY_DN20971_c0_g16; TRINITY_DN20971_c0_g17; TRINITY_DN20971_c0_g18; TRINITY_DN20971_c0_g2; TRINITY_DN20971_c0_g3; TRINITY_DN20971_c0_g4; TRINITY_DN20971_c0_g5; TRINITY_DN20971_c0_g6; TRINITY_DN20971_c0_g7;…	-
23	SjMEG-8.4_h10112_g1_i5_OK	217.03	0.46	7.22241	7.77142	TRINITY_DN20885_c0_g1; TRINITY_DN20885_c0_g10; TRINITY_DN20885_c0_g11; TRINITY_DN20885_c0_g12; TRINITY_DN20885_c0_g13; TRINITY_DN20885_c0_g2; TRINITY_DN20885_c0_g3; TRINITY_DN20885_c0_g4; TRINITY_DN20885_c0_g5; TRINITY_DN20885_c0_g6; TRINITY_DN20885_c0_g7; TRINITY_DN20885_c0_g8; TRINITY_DN20885_c0_g9; TRINITY_DN8171_c0_g2; TRINITY_DN8171_c0_g3	-
24	SjMEG-26.2_h14719_g1	686.78	3.92	7.12715	9.434	TRINITY_DN21405_c0_g1; TRINITY_DN21405_c0_g2; TRINITY_DN21405_c0_g3; TRINITY_DN21405_c0_g4; TRINITY_DN21405_c0_g5; TRINITY_DN21405_c0_g6; TRINITY_DN21405_c0_g7	-
26	SjMEG-22_h15728_g1_i1	119.5	0	6.91289	6.91289	TRINITY_DN23561_c1_g1; TRINITY_DN23561_c1_g10; TRINITY_DN23561_c1_g2; TRINITY_DN23561_c1_g3; TRINITY_DN23561_c1_g4; TRINITY_DN23561_c1_g5; TRINITY_DN23561_c1_g6; TRINITY_DN23561_c1_g7; TRINITY_DN23561_c1_g8; TRINITY_DN23561_c1_g9	-
25	SjMEG-n.1	136.05	0	6.9	7.09856	TRINITY_DN19186_c0_g1_i1; TRINITY_DN19186_c0_g5_i3; TRINITY_DN19186_c0_g7_i1
27	SjMEG-19_h14391_g1_i1	590.74	4.33	6.79468	9.21934	TRINITY_DN21151_c0_g1; TRINITY_DN21151_c0_g10; TRINITY_DN21151_c0_g11; TRINITY_DN21151_c0_g12; TRINITY_DN21151_c0_g13; TRINITY_DN21151_c0_g2; TRINITY_DN21151_c0_g3; TRINITY_DN21151_c0_g4; TRINITY_DN21151_c0_g5; TRINITY_DN21151_c0_g6; TRINITY_DN21151_c0_g7; TRINITY_DN21151_c0_g8; TRINITY_DN21151_c0_g9; TRINITY_DN62535_c0_g1	-
20	SjMEG-26.4_	1193.01	10.3	6.7	10.234	TRINITY_DN22974_c0_g1; TRINITY_DN22974_c0_g10; TRINITY_DN22974_c0_g11; TRINITY_DN22974_c0_g13;	-
30	SjMEG-32.1_h11676_g1_i1	72.54	0	6.20046	6.20046	TRINITY_DN18457_c0_g1; TRINITY_DN18457_c0_g2	-
33	SjMEG-5_h9827_g1_i2	917.19	16.35	5.72579	9.86811	TRINITY_DN20032_c0_g1	-
6	SjCystatin_h15734_g1	8810.31	0	13.1051	13.1051	TRINITY_DN23559_c0_g1; TRINITY_DN23559_c0_g10; TRINITY_DN23559_c0_g11; TRINITY_DN23559_c0_g12; TRINITY_DN23559_c0_g13; TRINITY_DN23559_c0_g14; TRINITY_DN23559_c0_g15; TRINITY_DN23559_c0_g16; TRINITY_DN23559_c0_g17; TRINITY_DN23559_c0_g18; TRINITY_DN23559_c0_g19; TRINITY_DN23559_c0_g2; TRINITY_DN23559_c0_g21; TRINITY_DN23559_c0_g22; TRINITY_DN23559_c0_g23; TRINITY_DN23559_c0_g3; TRINITY_DN23559_c0…	-
174	SjPalmitoyl_thioesterase_h11509_g1_i1	472.99	32.45	3.82478	8.98425	TRINITY_DN18230_c0_g1; TRINITY_DN21271_c0_g1; TRINITY_DN21271_c0_g2; TRINITY_DN21271_c0_g3; TRINITY_DN21271_c0_g4	-
331	SjAspartyl_protease_h18246_g1_i1	349.2	40.43	3.07943	8.60966	TRINITY_DN23779_c0_g10; TRINITY_DN23779_c0_g12; TRINITY_DN23779_c0_g18; TRINITY_DN23779_c0_g19; TRINITY_DN23779_c0_g2; TRINITY_DN23779_c0_g20; TRINITY_DN23779_c0_g23; TRINITY_DN23779_c0_g25; TRINITY_DN23779_c0_g27; TRINITY_DN23779_c0_g28; TRINITY_DN23779_c0_g3; TRINITY_DN23779_c0_g30; TRINITY_DN23779_c0_g32; TRINITY_DN23779_c0_g33; TRINITY_DN23779_c0_g4; TRINITY_DN23779_c0_g5; TRINITY_DN23779_c0_…	-
632	SjHepatotoxic_ribonuclease_h15205_g1_i1	115.21	21.07	2.39658	7.10098	TRINITY_DN21327_c0_g1; TRINITY_DN35666_c0_g1	-
29	SjSerpin_h12510_g1_i1	77.16	0	6.28836	6.28836	TRINITY_DN21320_c0_g1; TRINITY_DN21320_c0_g2	-
36	SjPhospholipase_h14487_g1_i2_Smp_031180	46.74	0	5.57713	5.57713	TRINITY_DN22237_c0_g1	-
63	SjPhospholipase_h14895_g1_i1_Smp_031190	42.05	0.52	4.82387	5.44526	TRINITY_DN15202_c0_g1; TRINITY_DN15202_c0_g2; TRINITY_DN15202_c0_g3; TRINITY_DN26256_c0_g1; TRINITY_DN7986_c0_g1	-
9	SjAnnexin_h13936_g1_i1_poor_gene_model	2954.65	0	11.5293	11.5293	TRINITY_DN23870_c4_g10; TRINITY_DN23870_c4_g18; TRINITY_DN23870_c4_g19; TRINITY_DN23870_c4_g2	-
14	SjAnnexin_h18274_g1_i1	4708.98	1.32	10.9874	12.2019	TRINITY_DN18277_c0_g2; TRINITY_DN22002_c0_g10; TRINITY_DN22002_c0_g11; TRINITY_DN22002_c0_g12; TRINITY_DN22002_c0_g13; TRINITY_DN22002_c0_g14; TRINITY_DN22002_c0_g16; TRINITY_DN22002_c0_g17; TRINITY_DN22002_c0_g4; TRINITY_DN22002_c0_g5; TRINITY_DN22002_c0_g6; TRINITY_DN22002_c0_g7; TRINITY_DN22002_c0_g9; TRINITY_DN22536_c0_g11; TRINITY_DN22536_c0_g12; TRINITY_DN22536_c0_g13; TRINITY_DN22536_c0_g1…	-
28	SjTetraspanin_h15899_g1_i2	133.16	0.65	6.34534	7.07478	TRINITY_DN21355_c0_g1; TRINITY_DN21355_c0_g2; TRINITY_DN21355_c0_g3; TRINITY_DN21355_c0_g4; TRINITY_DN8780_c0_g1	-
85	SjTetraspanin_h16530_g1_i1	22.01	0	4.52419	4.52419	TRINITY_DN20876_c0_g1	-
11	SjDUF_Natterin_h12339_g1_i1	6433.12	1.3	11.4499	12.6518	TRINITY_DN19618_c0_g1	-
18	SjVAL-7_h8808_g1_i1	1600.75	0.86	9.75013	10.6462	TRINITY_DN16680_c0_g1; TRINITY_DN50689_c0_g1	-
31	Smp_139530.1	64.36	0	6.03034	6.03034	TRINITY_DN33115_c0_g1	cellular tumor antigen P53%2C putative db_xref PMID:20040488 with EMBL:ACN51391 evidence Inferred from Sequence Orthology
32	Smp_154920.1	55.6	0	5.82273	5.82273	TRINITY_DN16961_c0_g3	ral guanine nucleotide dissociation stimulator evidence Inferred from Electronic Annotation
34	Smp_122810.1	50.79	0	5.6946	5.6946	TRINITY_DN8580_c0_g1; TRINITY_DN8580_c0_g2; TRINITY_DN8580_c0_g3	MEChanosensory abnormality family member evidence Inferred from Electronic Annotation
35	Smp_162900.1	48.07	0	5.61677	5.61677	TRINITY_DN10298_c0_g1; TRINITY_DN18543_c0_g1; TRINITY_DN21867_c0_g1; TRINITY_DN8295_c0_g1	tyrosine protein kinase pr2 evidence Inferred from Electronic Annotation
37	Smp_160740.1	46.35	0	5.56529	5.56529	TRINITY_DN23352_c0_g5	choline transporter protein 2 evidence Inferred from Electronic Annotation
38	Smp_201140.1	46.17	0	5.5598	5.5598	TRINITY_DN11327_c0_g1; TRINITY_DN14785_c0_g2; TRINITY_DN15302_c2_g1; TRINITY_DN21026_c0_g2	hypothetical protein evidence Inferred from Electronic Annotation
39	Smp_046430.1	45.38	0	5.53543	5.53543	TRINITY_DN10723_c1_g1; TRINITY_DN2308_c0_g1; TRINITY_DN2308_c0_g2	ubiquitin carboxyl terminal hydrolase evidence Inferred from Electronic Annotation
40	Smp_154800.1	44.67	0	5.51317	5.51317	TRINITY_DN15354_c1_g1; TRINITY_DN21213_c5_g2; TRINITY_DN25514_c0_g1; TRINITY_DN37118_c0_g1; TRINITY_DN42874_c0_g1; TRINITY_DN9404_c0_g2; TRINITY_DN9404_c0_g3	DC STAMP domain containing protein 2 evidence Inferred from Electronic Annotation
41	Smp_151570.1	44	0	5.49185	5.49185	TRINITY_DN23769_c2_g4	tetratricopeptide repeat protein 29 evidence Inferred from Electronic Annotation
42	Smp_068530.1	41.48	0	5.40871	5.40871	TRINITY_DN23885_c3_g11; TRINITY_DN23885_c3_g24	syntenin 1 evidence Inferred from Electronic Annotation
43	Smp_135040.1	38.85	0	5.31651	5.31651	TRINITY_DN23864_c4_g8; TRINITY_DN28545_c0_g1; TRINITY_DN49867_c0_g1	gamma aminobutyric acid receptor subunit evidence Inferred from Electronic Annotation
44	Smp_244770.1	69.4	0.82	5.27357	6.15421	TRINITY_DN15173_c0_g1; TRINITY_DN17377_c0_g3; TRINITY_DN67812_c0_g1	cation transporting atpase worm evidence Inferred from Electronic Annotation
45	Smp_243720.1	35.32	0	5.18269	5.18269	TRINITY_DN23856_c2_g19; TRINITY_DN24085_c0_g1; TRINITY_DN6488_c0_g1; TRINITY_DN6684_c0_g1	myosin XV evidence Inferred from Electronic Annotation
46	Smp_012150.1	34.58	0	5.15299	5.15299	TRINITY_DN23885_c3_g20; TRINITY_DN4502_c0_g1	hypothetical protein evidence Inferred from Electronic Annotation
47	Smp_037200.1	34.13	0	5.13463	5.13463	TRINITY_DN57391_c0_g1	nucleoporin NDC1 evidence Inferred from Electronic Annotation
48	Smp_160060.1	34	0	5.12928	5.12928	TRINITY_DN44116_c0_g1; TRINITY_DN55137_c0_g1	hypothetical protein evidence Inferred from Electronic Annotation
49	Smp_196960.1	33.67	0	5.11562	5.11562	TRINITY_DN13680_c5_g1	tRNA guanosine 2' O methyltransferase TRM13 evidence Inferred from Electronic Annotation
50	Smp_123740.1	33.66	0	5.1152	5.1152	TRINITY_DN11870_c0_g2; TRINITY_DN38045_c0_g1	spectrin beta chain%2C brain 1 evidence Inferred from Electronic Annotation
51	Smp_047090.1	33.42	0	5.10518	5.10518	TRINITY_DN53738_c0_g1	hypothetical protein evidence Inferred from Electronic Annotation
52	Smp_051990.1	57.21	0.73	5.07242	5.88118	TRINITY_DN28896_c0_g1; TRINITY_DN32671_c0_g1; TRINITY_DN63985_c0_g1	kyphoscoliosis peptidase evidence Inferred from Electronic Annotation
53	Smp_033050.2	32.33	0	5.05875	5.05875	TRINITY_DN72109_c0_g1	DNA topoisomerase 1 evidence Inferred from Electronic Annotation
54	Smp_044530.1	382.26	10.92	5.00687	8.62271	TRINITY_DN23233_c4_g26; TRINITY_DN46576_c0_g1	growth factor receptor bound protein evidence Inferred from Electronic Annotation
55	Smp_175910.1	30.27	0	4.96671	4.96671	TRINITY_DN11206_c0_g1; TRINITY_DN23292_c2_g2; TRINITY_DN23856_c4_g1; TRINITY_DN25379_c0_g1	sperm nuclear basic protein pl i plib evidence Inferred from Electronic Annotation
56	Smp_176800.1	29.63	0	4.93687	4.93687	TRINITY_DN1162_c0_g1; TRINITY_DN1162_c0_g2; TRINITY_DN18679_c1_g1; TRINITY_DN53503_c0_g1	protein elys evidence Inferred from Electronic Annotation
57	Smp_212300.1	29.53	0	4.93216	4.93216	TRINITY_DN16217_c0_g2; TRINITY_DN19776_c0_g1; TRINITY_DN19776_c0_g2; TRINITY_DN41329_c0_g1	Rho GTPase activator (Rgd1) evidence Inferred from Electronic Annotation
58	Smp_022810.2	28.99	0	4.90641	4.90641	TRINITY_DN20778_c1_g2; TRINITY_DN23891_c8_g23	ras protein Rab 2B evidence Inferred from Electronic Annotation
59	Smp_137490.1	27.94	0	4.85499	4.85499	TRINITY_DN34666_c0_g1	PDZ domain protein evidence Inferred from Electronic Annotation
60	Smp_145040.1	27.88	0	4.852	4.852	TRINITY_DN10750_c0_g1; TRINITY_DN66054_c0_g1	hypothetical protein evidence Inferred from Electronic Annotation
61	Smp_084540.1	43.77	0.56	4.84291	5.50239	TRINITY_DN10168_c0_g1; TRINITY_DN9453_c0_g1	angiogenic factor with G patch and FHA domains evidence Inferred from Electronic Annotation
62	Smp_144050.1	27.61	0	4.83845	4.83845	TRINITY_DN27431_c0_g1; TRINITY_DN60845_c0_g1; TRINITY_DN7931_c0_g1; TRINITY_DN7931_c0_g2	receptor type tyrosine protein phosphatase F evidence Inferred from Electronic Annotation
64	Smp_243150.1	53.71	0.99	4.78096	5.79961	TRINITY_DN15650_c1_g1; TRINITY_DN19724_c9_g1; TRINITY_DN19724_c9_g2; TRINITY_DN43876_c0_g1; TRINITY_DN48372_c0_g1; TRINITY_DN53207_c0_g1	teneurin evidence Inferred from Electronic Annotation
65	Smp_033540.1	26.37	0	4.77452	4.77452	TRINITY_DN23882_c0_g24; TRINITY_DN23882_c0_g26; TRINITY_DN23882_c0_g28; TRINITY_DN23882_c0_g40	Carbonyl reductase-like protein trans-spliced db_xref PMID:7665603 evidence Traceable Author Statemen
66	Smp_154650.1	26.15	0	4.76288	4.76288	TRINITY_DN43038_c0_g1; TRINITY_DN45896_c0_g1	CTD small phosphatase protein evidence Inferred from Electronic Annotation
67	Smp_199150.1	26.15	0	4.76288	4.76288	TRINITY_DN21909_c9_g8; TRINITY_DN23905_c11_g2	rho guanine nucleotide exchange factor 3 evidence Inferred from Electronic Annotation
68	Smp_150630.1	26.15	0	4.76288	4.76288	TRINITY_DN488_c0_g3	Dissatisfaction (Dsf) db_xref PMID:16406405 evidence Traceable Author Statemen
69	Smp_136720.1	25.71	0	4.73931	4.73931	TRINITY_DN23779_c0_g22	subfamily A1A unassigned peptidase (A01 family) evidence Inferred from Electronic Annotation
70	Smp_155450.1	25.53	0	4.72955	4.72955	TRINITY_DN15206_c0_g1; TRINITY_DN15206_c1_g2; TRINITY_DN15206_c1_g3	SH3 and multiple ankyrin repeat domains protein evidence Inferred from Electronic Annotation
71	Smp_169460.1	25.38	0	4.72137	4.72137	TRINITY_DN18109_c0_g1	RAB18%2C member RAS oncogene family evidence Inferred from Electronic Annotation
72	Smp_131030.1	25.29	0	4.71644	4.71644	TRINITY_DN24238_c0_g1	transmembrane protein 63C evidence Inferred from Electronic Annotation
73	Smp_199540.1	25.23	0	4.71315	4.71315	TRINITY_DN21909_c3_g1; TRINITY_DN40871_c0_g1	type inositol trisphosphate receptor inositol trisphosphate receptor type evidence Inferred from Electronic Annotation
74	Smp_127650.1	25.17	0	4.70984	4.70984	TRINITY_DN69946_c0_g1	Secretory carrier associated membrane protein 2 evidence Inferred from Electronic Annotation
75	Smp_050750.1	25.17	0	4.70984	4.70984	TRINITY_DN32284_c0_g1	hypothetical protein evidence Inferred from Electronic Annotation
76	Smp_105950.1	25.17	0	4.70984	4.70984	TRINITY_DN24106_c0_g1	armadillo repeat containing protein 3 evidence Inferred from Electronic Annotation
77	Smp_165230.1	28.63	0.14	4.69995	4.89579	TRINITY_DN17148_c0_g1; TRINITY_DN22956_c5_g14; TRINITY_DN23895_c7_g23	receptor for egg jelly 6 evidence Inferred from Electronic Annotation
78	Smp_155970.1	28.82	0.16	4.68408	4.90593	TRINITY_DN23485_c0_g1; TRINITY_DN32731_c0_g1	Two pore potassium channel protein sup 9 evidence Inferred from Electronic Annotation
79	Smp_124500.1	24.22	0	4.6565	4.6565	TRINITY_DN11974_c0_g1; TRINITY_DN11974_c0_g2; TRINITY_DN44422_c0_g1; TRINITY_DN58448_c0_g1	a disintegrin and metalloproteinase with evidence Inferred from Electronic Annotation
80	Smp_150140.1	23.17	0	4.59515	4.59515	TRINITY_DN20335_c2_g4	RNA binding motif single stranded interacting evidence Inferred from Electronic Annotation
81	Smp_213510.1	22.77	0	4.57107	4.57107	TRINITY_DN10835_c0_g2; TRINITY_DN13884_c2_g1; TRINITY_DN15281_c0_g1; TRINITY_DN15281_c0_g2; TRINITY_DN15281_c0_g3; TRINITY_DN3773_c0_g1	hypothetical protein evidence Inferred from Electronic Annotation
82	Smp_243490.1	34.01	0.48	4.5641	5.14934	TRINITY_DN12334_c0_g1; TRINITY_DN30954_c0_g1; TRINITY_DN31185_c0_g1	rab6 interacting protein 2:elks:erc:cast evidence Inferred from Electronic Annotation
83	Smp_148200.1	33.26	0.45	4.5624	5.11728	TRINITY_DN12876_c0_g1; TRINITY_DN20267_c0_g1	junctophilin 2 evidence Inferred from Electronic Annotation
84	Smp_200190.1	22.45	0	4.55152	4.55152	TRINITY_DN54569_c0_g1	lung cancer oncogene 5 evidence Inferred from Electronic Annotation
86	Smp_000950.1	21.96	0	4.52105	4.52105	TRINITY_DN15490_c0_g1; TRINITY_DN33911_c0_g1	protein mab like evidence Inferred from Electronic Annotation
87	Smp_012530.1	21.91	0	4.51791	4.51791	TRINITY_DN9807_c0_g1	transcription elongation factor spt4 evidence Inferred from Electronic Annotation
88	Smp_172990.1	21.58	0	4.49697	4.49697	TRINITY_DN40801_c0_g1; TRINITY_DN50250_c0_g1; TRINITY_DN50250_c0_g2	leucine rich repeat containing protein 68 evidence Inferred from Electronic Annotation
89	Smp_180180.2	21.45	0	4.48864	4.48864	TRINITY_DN23885_c3_g2	-
90	Smp_165350.1	26.93	0.26	4.47032	4.81711	TRINITY_DN57826_c0_g1; TRINITY_DN9987_c0_g1; TRINITY_DN9987_c0_g2	CLIP associating protein 1 evidence Inferred from Electronic Annotation
91	Smp_000050.1	20.98	0	4.45812	4.45812	TRINITY_DN3729_c0_g1; TRINITY_DN46025_c0_g1; TRINITY_DN71957_c0_g1; TRINITY_DN8761_c0_g3; TRINITY_DN8859_c0_g1	transient receptor potential cation channel evidence Inferred from Electronic Annotation
92	Smp_171450.1	95.06	3.38	4.45493	6.63575	TRINITY_DN15883_c0_g1; TRINITY_DN15883_c0_g2; TRINITY_DN21584_c0_g1; TRINITY_DN21909_c6_g1; TRINITY_DN619_c0_g1; TRINITY_DN64161_c0_g1	E3 ubiquitin protein ligase mib1 evidence Inferred from Electronic Annotation
93	Smp_054540.1	20.68	0	4.43829	4.43829	TRINITY_DN49266_c0_g1	Microtubule associated protein RP:EB family evidence Inferred from Electronic Annotation
94	Smp_075800.1	20.66	0	4.43696	4.43696	TRINITY_DN66652_c0_g1	hemoglobinase db_xref PMID:2382765 evidence Traceable Author Statemen
95	Smp_007690.1	20.61	0	4.43363	4.43363	TRINITY_DN14188_c0_g1	tyrosine 3 monooxygenase evidence Inferred from Electronic Annotation
96	Smp_244470.1	77.12	2.62	4.43163	6.33521	TRINITY_DN12718_c0_g2; TRINITY_DN12718_c0_g3; TRINITY_DN17369_c1_g2; TRINITY_DN20169_c2_g1; TRINITY_DN23021_c2_g2; TRINITY_DN23882_c0_g2; TRINITY_DN23891_c8_g11; TRINITY_DN23891_c8_g14; TRINITY_DN23891_c8_g22; TRINITY_DN23891_c8_g25; TRINITY_DN23891_c8_g9; TRINITY_DN32482_c0_g1; TRINITY_DN33116_c0_g1; TRINITY_DN35646_c0_g1; TRINITY_DN55285_c0_g1; TRINITY_DN69727_c0_g1; TRINITY_DN7913_c0_g1	lethal(2) giant larvae protein 2 evidence Inferred from Electronic Annotation
97	Smp_077980.1	73.14	2.45	4.42558	6.25908	TRINITY_DN23331_c0_g1; TRINITY_DN66299_c0_g1	neuroendocrine convertase 2 evidence Inferred from Electronic Annotation
98	Smp_171880.1	107.61	4.07	4.42103	6.81609	TRINITY_DN16325_c0_g2; TRINITY_DN21389_c2_g1; TRINITY_DN22212_c4_g8	vacuolar protein sorting associated protein 8 evidence Inferred from Electronic Annotation
99	Smp_167070.1	35.19	0.71	4.40352	5.20555	TRINITY_DN14105_c0_g1; TRINITY_DN14105_c0_g2; TRINITY_DN14105_c0_g3	Peptidase M8%2C leishmanolysin%2Cdomain containing protein evidence Inferred from Electronic Annotation
100	Smp_162260.1	51.72	1.5	4.39835	5.76075	TRINITY_DN19520_c0_g1	phosphatidylinositol binding clathrin assembly evidence Inferred from Electronic Annotation
101	Smp_199610.1	19.88	0	4.38405	4.38405	TRINITY_DN27196_c0_g1; TRINITY_DN28369_c0_g1; TRINITY_DN32057_c0_g1	polycystic kidney disease protein 2 evidence Inferred from Electronic Annotation
102	Smp_166660.1	19.66	0	4.36877	4.36877	TRINITY_DN10437_c0_g2; TRINITY_DN13248_c0_g1; TRINITY_DN13248_c0_g2	hypothetical protein evidence Inferred from Electronic Annotation
103	Smp_136730.1	19.61	0	4.36527	4.36527	TRINITY_DN36286_c0_g1	streptomycin 3''-adenylyltransferase 1 with UniProtKB:Q2Q018 evidence Non-traceable Author Statemen
104	Smp_146430.1	19.6	0	4.36457	4.36457	TRINITY_DN11449_c0_g2; TRINITY_DN37937_c0_g1; TRINITY_DN57402_c0_g1	beta 14 galactosyltransferase evidence Inferred from Electronic Annotation
105	Smp_175320.1	42.13	1.13	4.33977	5.46793	TRINITY_DN23666_c0_g7; TRINITY_DN23867_c3_g10; TRINITY_DN23867_c3_g16; TRINITY_DN23867_c3_g4; TRINITY_DN23867_c3_g6; TRINITY_DN23867_c3_g7; TRINITY_DN52482_c0_g1	GPI inositol deacylase evidence Inferred from Electronic Annotation
106	Smp_124540.1	24.06	0.24	4.33697	4.66107	TRINITY_DN70949_c0_g1; TRINITY_DN9039_c0_g1	voltage dependent calcium channel subunit evidence Inferred from Electronic Annotation
107	Smp_246700.1	19.15	0	4.33271	4.33271	TRINITY_DN14482_c0_g1; TRINITY_DN14482_c0_g2; TRINITY_DN65697_c0_g1	tyrosine protein kinase Abl evidence Inferred from Electronic Annotation
108	Smp_161110.1	19.11	0	4.32984	4.32984	TRINITY_DN31574_c0_g1	FH1:FH2 domain containing protein 3 evidence Inferred from Electronic Annotation
109	Smp_136030.1	18.86	0	4.31179	4.31179	TRINITY_DN29397_c0_g1; TRINITY_DN51678_c0_g1	anion exchange protein evidence Inferred from Electronic Annotation
110	Smp_130280.1	63.73	2.29	4.29828	6.06652	TRINITY_DN11092_c0_g1; TRINITY_DN16143_c0_g1; TRINITY_DN20235_c1_g1; TRINITY_DN20235_c1_g3; TRINITY_DN2117_c0_g1; TRINITY_DN23601_c1_g5; TRINITY_DN28063_c0_g1; TRINITY_DN35773_c0_g1	neurogenic locus notch protein evidence Inferred from Electronic Annotation,term neurexin 1 alpha evidence Inferred from Electronic Annotation
111	Smp_077390.1	18.63	0	4.29499	4.29499	TRINITY_DN45320_c0_g1	hypothetical protein evidence Inferred from Electronic Annotation
112	Smp_206190.1	18.52	0	4.28688	4.28688	TRINITY_DN17774_c0_g1	complement C1q tumor necrosis factor evidence Inferred from Electronic Annotation
113	Smp_135610.1	18.48	0	4.28392	4.28392	TRINITY_DN6986_c0_g1	protocadherin fat 1 evidence Inferred from Electronic Annotation
114	Smp_141500.2	18.26	0	4.26754	4.26754	TRINITY_DN61218_c0_g1; TRINITY_DN69919_c0_g1; TRINITY_DN7017_c0_g1	hypothetical protein evidence Inferred from Electronic Annotation
115	Smp_159260.1	47.85	1.54	4.26546	5.65507	TRINITY_DN41646_c0_g1	protein broad minded evidence Inferred from Electronic Annotation
116	Smp_175090.2	17.97	0	4.24565	4.24565	TRINITY_DN14241_c1_g1; TRINITY_DN20204_c2_g1; TRINITY_DN23771_c0_g6; TRINITY_DN23771_c0_g9; TRINITY_DN3510_c0_g1; TRINITY_DN49165_c0_g1; TRINITY_DN5450_c0_g2; TRINITY_DN8336_c0_g1	long-chain-fatty-acid--CoA ligase evidence Inferred from Electronic Annotation
117	Smp_024930.1	17.9	0	4.24031	4.24031	TRINITY_DN10575_c0_g1; TRINITY_DN10575_c0_g2; TRINITY_DN10575_c0_g3; TRINITY_DN12092_c0_g1	enoyl coenzyme A hydratase domain containing protein 3 evidence Inferred from Electronic Annotation
118	Smp_034270.1	17.81	0	4.23343	4.23343	TRINITY_DN19541_c0_g1	hypothetical protein evidence Inferred from Electronic Annotation
119	Smp_200800.1	17.61	0	4.21801	4.21801	TRINITY_DN13244_c0_g1; TRINITY_DN47934_c0_g1	hypothetical protein evidence Inferred from Electronic Annotation
120	Smp_133590.1	78.55	3.28	4.21618	6.37208	TRINITY_DN18324_c0_g1	hypothetical protein evidence Inferred from Electronic Annotation
121	Smp_165060.1	23.71	0.33	4.2156	4.64616	TRINITY_DN20871_c0_g1	hypothetical protein evidence Inferred from Electronic Annotation
122	Smp_045470.1	17.47	0	4.20711	4.20711	TRINITY_DN15275_c0_g1; TRINITY_DN23237_c4_g1; TRINITY_DN36748_c0_g1	prospero homeobox protein 2 evidence Inferred from Electronic Annotation
123	Smp_241950.1	17.47	0	4.20711	4.20711	TRINITY_DN65144_c0_g1; TRINITY_DN9386_c0_g1; TRINITY_DN9386_c0_g2	HMG-CoA synthase
124	Smp_155240.1	17.29	0	4.19298	4.19298	TRINITY_DN39809_c0_g1; TRINITY_DN56337_c0_g1	tubulin tyrosine ligase family evidence Inferred from Electronic Annotation
125	Smp_168020.1	17.28	0	4.19219	4.19219	TRINITY_DN10003_c1_g1	AMY 1 associating protein expressed in testis evidence Inferred from Electronic Annotation
126	Smp_153850.1	54.24	2.04	4.18357	5.83996	TRINITY_DN12624_c0_g1	zinc finger ch type domain containing protein zinc finger and btb domain containing protein evidence Inferred from Electronic Annotation
127	Smp_177020.1	17.16	0	4.18269	4.18269	TRINITY_DN12880_c1_g1; TRINITY_DN14100_c0_g2; TRINITY_DN22049_c1_g2; TRINITY_DN23895_c7_g11; TRINITY_DN23895_c7_g14; TRINITY_DN23895_c7_g21; TRINITY_DN23895_c7_g6; TRINITY_DN44877_c0_g1; TRINITY_DN52248_c0_g1; TRINITY_DN53975_c0_g1; TRINITY_DN63855_c0_g1; TRINITY_DN8340_c1_g1	PhosphoLipase C Like family member (pll 1) evidence Inferred from Electronic Annotation
128	Smp_144200.1	16.86	0	4.15866	4.15866	TRINITY_DN23303_c3_g1; TRINITY_DN23303_c3_g6; TRINITY_DN63742_c0_g1; TRINITY_DN72053_c0_g1	hypothetical protein evidence Inferred from Electronic Annotation
129	Smp_146580.1	16.57	0	4.13504	4.13504	TRINITY_DN35995_c0_g1	UNCoordinated family member (unc 62) evidence Inferred from Electronic Annotation
130	Smp_046800.2	141.84	7.22	4.11912	7.2294	TRINITY_DN23901_c5_g2; TRINITY_DN59137_c0_g1	fatty acid binding protein evidence Inferred from Electronic Annotation
131	Smp_148460.1	16.35	0	4.11686	4.11686	TRINITY_DN12781_c0_g1	neurofibromin evidence Inferred from Electronic Annotation
132	Smp_246970.1	16.34	0	4.11603	4.11603	TRINITY_DN10556_c0_g1; TRINITY_DN32763_c0_g1; TRINITY_DN58784_c0_g1	neuronal RhoA GEF protein evidence Inferred from Electronic Annotation
133	Smp_150650.1	103.74	5.06	4.11135	6.77873	TRINITY_DN1153_c0_g1; TRINITY_DN2588_c0_g1; TRINITY_DN30544_c0_g1; TRINITY_DN62466_c0_g1	hypothetical protein evidence Inferred from Electronic Annotation
134	Smp_164080.1	16.16	0	4.10098	4.10098	TRINITY_DN20720_c0_g3; TRINITY_DN20720_c0_g4	bromodomain testis specific protein evidence Inferred from Electronic Annotation
135	Smp_025830.1	16.15	0	4.10014	4.10014	TRINITY_DN72596_c0_g1	adp ribosyl cyclase db_xref PMID:16101292 evidence Traceable Author Statemen
136	Smp_245680.1	16.1	0	4.09592	4.09592	TRINITY_DN189_c0_g2; TRINITY_DN71650_c0_g1	irregular chiasm C roughest protein evidence Inferred from Electronic Annotation
137	MEG_20	16.07	0	4.09339	4.09339	TRINITY_DN50102_c0_g1	-
138	Smp_092810.1	15.98	0	4.08576	4.08576	TRINITY_DN23882_c0_g13; TRINITY_DN23882_c0_g15; TRINITY_DN23882_c0_g27; TRINITY_DN23882_c0_g8; TRINITY_DN23887_c11_g16; TRINITY_DN23887_c11_g6	transmembrane protein 33 evidence Inferred from Electronic Annotation
139	Smp_081820.3	15.97	0	4.08491	4.08491	TRINITY_DN10468_c0_g1; TRINITY_DN48987_c0_g1	synaptic glycoprotein sc2 evidence Inferred from Electronic Annotation
140	Smp_245320.1	15.81	0	4.07125	4.07125	TRINITY_DN46647_c0_g1; TRINITY_DN4961_c0_g1; TRINITY_DN4961_c0_g2	NMDA type glutamate receptor 1 evidence Inferred from Electronic Annotation
141	Smp_174720.1	15.7	0	4.06178	4.06178	TRINITY_DN72322_c0_g1	hypothetical protein evidence Inferred from Electronic Annotation
142	Smp_091000.1	15.65	0	4.05745	4.05745	TRINITY_DN47617_c0_g1	transmembrane protein 151B evidence Inferred from Electronic Annotation
143	Smp_149330.1	15.44	0	4.03914	4.03914	TRINITY_DN20690_c1_g3; TRINITY_DN59283_c0_g1	cadherin egf lag seven pass evidence Inferred from Electronic Annotation
144	Smp_155000.2	77.28	3.78	4.03356	6.35861	TRINITY_DN13546_c0_g1; TRINITY_DN14784_c0_g1; TRINITY_DN23511_c0_g8; TRINITY_DN23895_c7_g1; TRINITY_DN23895_c7_g15; TRINITY_DN23895_c7_g26; TRINITY_DN23895_c7_g30; TRINITY_DN36507_c0_g1; TRINITY_DN49066_c0_g1; TRINITY_DN58567_c0_g1	pumilio evidence Inferred from Electronic Annotation
145	Smp_247930.1	15.25	0	4.02237	4.02237	TRINITY_DN36373_c0_g1; TRINITY_DN7903_c0_g1; TRINITY_DN7903_c0_g2	frizzled
146	Smp_152290.1	15.23	0	4.02059	4.02059	TRINITY_DN34549_c0_g1	beta arrestin 1 evidence Inferred from Electronic Annotation
147	Smp_126880.1	39.17	1.5	4.00612	5.38094	TRINITY_DN4743_c0_g1	hypothetical protein evidence Inferred from Electronic Annotation
148	Smp_160300.1	15.01	0	4.0009	4.0009	TRINITY_DN17330_c1_g1	hypothetical protein evidence Inferred from Electronic Annotation
149	Smp_132250.1	27.81	0.8	4.0005	4.88801	TRINITY_DN16868_c0_g1; TRINITY_DN26585_c0_g1	hypothetical protein evidence Inferred from Electronic Annotation
150	Smp_011830.1	14.99	0	3.9991	3.9991	TRINITY_DN10323_c0_g1	hypothetical protein evidence Inferred from Electronic Annotation
151	Smp_136920.1	27.65	0.81	3.98447	4.88069	TRINITY_DN17170_c0_g1; TRINITY_DN23803_c0_g1; TRINITY_DN24865_c0_g1	polypeptide evidence Inferred from Electronic Annotation
154	Smp_245510.1	22.06	0.48	3.96172	4.55704	TRINITY_DN11987_c0_g1; TRINITY_DN11987_c0_g2; TRINITY_DN3761_c3_g1; TRINITY_DN61687_c1_g1; TRINITY_DN68294_c0_g1	vesicular glutamate transporter 2 evidence Inferred from Electronic Annotation
157	Smp_160880.1	197.77	11.94	3.94119	7.71911	TRINITY_DN22202_c0_g1	phosphatidylcholine sterol acyltransferase evidence Inferred from Electronic Annotation
159	Smp_140920.1	15.96	0.12	3.92057	4.09424	TRINITY_DN11456_c0_g1; TRINITY_DN14501_c0_g2; TRINITY_DN46921_c0_g1; TRINITY_DN69959_c0_g1	Glutamate receptor%2C ionotropic kainate 3 evidence Inferred from Electronic Annotation
160	Smp_245250.1	49.16	2.34	3.90862	5.71425	TRINITY_DN11062_c2_g1; TRINITY_DN23885_c3_g7; TRINITY_DN40244_c0_g1; TRINITY_DN49328_c0_g1	WD repeat containing protein 67 evidence Inferred from Electronic Annotation
168	Smp_124720.1	111.07	6.73	3.85779	6.89239	TRINITY_DN11285_c0_g1; TRINITY_DN11285_c0_g2; TRINITY_DN17666_c0_g1; TRINITY_DN23861_c7_g20	hypothetical protein evidence Inferred from Electronic Annotation
169	Smp_148250.1	61.2	3.31	3.85115	6.03364	TRINITY_DN12760_c0_g2; TRINITY_DN12760_c0_g3; TRINITY_DN13700_c0_g1; TRINITY_DN13700_c0_g3; TRINITY_DN14746_c0_g1; TRINITY_DN15798_c1_g1; TRINITY_DN35668_c0_g1; TRINITY_DN61409_c0_g1; TRINITY_DN66737_c0_g1	protein unc 79 evidence Inferred from Electronic Annotation
170	Smp_151140.1	84.46	4.93	3.84915	6.49809	TRINITY_DN15292_c0_g1; TRINITY_DN17467_c0_g1; TRINITY_DN17467_c0_g2; TRINITY_DN17467_c0_g3; TRINITY_DN34388_c0_g1; TRINITY_DN68069_c0_g1; TRINITY_DN71845_c0_g1	rho associated protein kinase 2 evidence Inferred from Electronic Annotation
171	Smp_246740.1	30.67	1.21	3.841	5.03914	TRINITY_DN12943_c0_g3; TRINITY_DN14571_c0_g1; TRINITY_DN17101_c0_g2; TRINITY_DN17999_c0_g2; TRINITY_DN17999_c0_g4; TRINITY_DN23909_c19_g4	hypothetical protein evidence Inferred from Electronic Annotation
179	Smp_247370.1	713.59	50.2	3.8029	9.57892	TRINITY_DN21785_c0_g1; TRINITY_DN23233_c4_g12; TRINITY_DN23233_c4_g5	hypothetical protein evidence Inferred from Electronic Annotation
181	Smp_164730.1	15.84	0.21	3.79881	4.0917	TRINITY_DN16442_c0_g1; TRINITY_DN25826_c0_g1	rhodopsin orphan GPCR evidence Traceable Author Statemen
182	Smp_162970.1	36.56	1.7	3.79817	5.29499	TRINITY_DN16192_c0_g1; TRINITY_DN23886_c11_g1; TRINITY_DN47659_c0_g1; TRINITY_DN59580_c0_g1	triple functional domain protein evidence Inferred from Electronic Annotation
186	Smp_176780.1	20.36	0.55	3.78457	4.45352	TRINITY_DN18650_c0_g1; TRINITY_DN29230_c0_g1	hypothetical protein evidence Inferred from Electronic Annotation
192	Smp_144080.1	72.35	4.54	3.72684	6.28337	TRINITY_DN107_c0_g1; TRINITY_DN24073_c0_g1; TRINITY_DN45287_c0_g1; TRINITY_DN45697_c0_g1; TRINITY_DN57327_c0_g1; TRINITY_DN57818_c0_g1; TRINITY_DN66011_c0_g1	proprotein convertase subtilisin:kexin type 5 evidence Inferred from Electronic Annotation
194	Smp_159780.1	30.3	1.38	3.71713	5.03034	TRINITY_DN35592_c0_g1; TRINITY_DN51345_c0_g1; TRINITY_DN54236_c0_g1; TRINITY_DN69287_c0_g1	hypothetical protein evidence Inferred from Electronic Annotation
199	Smp_157390.1	39.13	2.1	3.69434	5.4002	TRINITY_DN12266_c1_g1; TRINITY_DN15712_c0_g1; TRINITY_DN23433_c1_g1	lipoma HMGIC fusion partner 2 protein evidence Inferred from Electronic Annotation
205	Smp_147550.1	27.3	1.22	3.67217	4.88362	TRINITY_DN13139_c0_g1; TRINITY_DN13139_c0_g2; TRINITY_DN37173_c0_g1	twik family of potassium channels evidence Inferred from Electronic Annotation
206	Smp_146120.1	22.27	0.84	3.66069	4.59156	TRINITY_DN37396_c0_g1; TRINITY_DN5334_c0_g1; TRINITY_DN59172_c0_g1; TRINITY_DN9791_c0_g2	high affinity cGMP specific 3'%2C5' cyclic evidence Inferred from Electronic Annotation
208	Smp_125500.1	233.43	17.58	3.65733	7.97734	TRINITY_DN23233_c4_g13; TRINITY_DN23765_c2_g14; TRINITY_DN23882_c0_g34	prenylcysteine oxidase evidence Inferred from Electronic Annotation
209	Smp_009250.1	48.11	2.94	3.63975	5.70183	TRINITY_DN22847_c0_g2; TRINITY_DN36778_c0_g1	ATPase%2C F1:V1:A1 complex%2C alpha:beta subunit evidence Inferred from Electronic Annotation
210	Smp_039300.1	40.13	2.32	3.63094	5.44128	TRINITY_DN21627_c0_g2	E3 ubiquitin protein ligase TRIM56 evidence Inferred from Electronic Annotation
216	Smp_124050.4	22.6	0.93	3.61211	4.61648	TRINITY_DN22648_c0_g1; TRINITY_DN8500_c0_g1; TRINITY_DN8500_c0_g2	venom allergen-like (VAL) 6 protein db_xref PMID:18294395 evidence Traceable Author Statemen
228	Smp_005740.1	492.51	40.47	3.57294	9.06064	TRINITY_DN2143_c0_g1; TRINITY_DN21471_c0_g1	Aquaporin 9 (AQP 9) (Small solute channel 1) evidence Inferred from Electronic Annotation
230	Smp_130440.1	133.19	10.34	3.56478	7.17523	TRINITY_DN20317_c0_g1; TRINITY_DN22583_c7_g2; TRINITY_DN23833_c2_g11; TRINITY_DN23833_c2_g14; TRINITY_DN23833_c2_g20; TRINITY_DN23902_c3_g1; TRINITY_DN6694_c0_g1	protein MICAL 3 evidence Inferred from Electronic Annotation
231	Smp_019310.1	49.92	3.33	3.55579	5.76155	TRINITY_DN15365_c0_g1	dynein light chain evidence Inferred from Electronic Annotation
236	Smp_064280.1	54.23	3.83	3.51536	5.88411	TRINITY_DN15460_c0_g1; TRINITY_DN23896_c5_g1	coiled coil domain containing protein 51 evidence Inferred from Electronic Annotation
238	Smp_056930.1	48.4	3.42	3.48239	5.72301	TRINITY_DN1269_c0_g1; TRINITY_DN16247_c1_g2; TRINITY_DN17532_c0_g1; TRINITY_DN48463_c0_g1	histone lysine N methyltransferase MLL3 evidence Inferred from Electronic Annotation
239	Smp_135210.1	36.56	2.38	3.4741	5.31976	TRINITY_DN11066_c0_g1; TRINITY_DN13577_c0_g1; TRINITY_DN13999_c0_g1; TRINITY_DN13999_c0_g3; TRINITY_DN59157_c0_g1; TRINITY_DN65674_c0_g1; TRINITY_DN65674_c0_g2	Multiple epidermal growth factor domains evidence Inferred from Electronic Annotation
240	Smp_196230.1	57	4.24	3.46841	5.95977	TRINITY_DN23233_c4_g1	Bcl2 associated athanogene 1 evidence Inferred from Electronic Annotation
247	Smp_163630.1	53.41	4.14	3.40403	5.8716	TRINITY_DN1523_c0_g1; TRINITY_DN16507_c0_g1; TRINITY_DN16507_c0_g3; TRINITY_DN23847_c4_g20	developmentally regulated antigen 10 evidence Inferred from Electronic Annotation
256	Smp_016630.1	16.45	0.7	3.35962	4.1819	TRINITY_DN23882_c0_g21; TRINITY_DN23882_c0_g31; TRINITY_DN23882_c0_g38; TRINITY_DN42069_c0_g1	trimeric G protein alpha o subunit with UniProtKB:Q8IT62 evidence Non-traceable Author Statemen
257	Smp_133690.1	22.87	1.33	3.3568	4.65535	TRINITY_DN11385_c0_g1; TRINITY_DN12943_c1_g1; TRINITY_DN23885_c3_g23; TRINITY_DN51025_c0_g1	discoidin domain containing receptor 2 evidence Inferred from Electronic Annotation
258	Smp_158990.1	44.6	3.46	3.35392	5.61648	TRINITY_DN16090_c0_g1; TRINITY_DN23902_c14_g9; TRINITY_DN3633_c0_g2	neuronal calcium sensor evidence Inferred from Electronic Annotation
260	Smp_157010.1	61.11	5.1	3.34794	6.0706	TRINITY_DN10396_c0_g1; TRINITY_DN22252_c1_g1; TRINITY_DN22252_c1_g2; TRINITY_DN2828_c0_g1; TRINITY_DN3349_c0_g1; TRINITY_DN36063_c0_g1; TRINITY_DN48721_c0_g1; TRINITY_DN51543_c0_g1; TRINITY_DN55776_c0_g1; TRINITY_DN56001_c0_g1; TRINITY_DN58031_c0_g1; TRINITY_DN68909_c0_g1	titin evidence Inferred from Electronic Annotation
262	Smp_163760.1	23.78	1.44	3.34422	4.7126	TRINITY_DN12012_c0_g1; TRINITY_DN61209_c0_g1; TRINITY_DN6368_c0_g1	menin evidence Inferred from Electronic Annotation
266	Smp_162930.1	73.92	6.44	3.33198	6.34625	TRINITY_DN10150_c0_g1; TRINITY_DN16012_c0_g2; TRINITY_DN16247_c1_g1; TRINITY_DN23874_c6_g21; TRINITY_DN25859_c0_g1; TRINITY_DN39556_c0_g1; TRINITY_DN61371_c0_g1	lysosomal trafficking regulator evidence Inferred from Electronic Annotation
269	Smp_149220.1	15.16	0.61	3.32729	4.06781	TRINITY_DN22212_c0_g1; TRINITY_DN3041_c0_g1; TRINITY_DN41571_c0_g1	G:T mismatch specific thymine DNA glycosylase evidence Inferred from Electronic Annotation
270	Smp_147020.1	56.3	4.72	3.32445	5.95466	TRINITY_DN16454_c0_g1; TRINITY_DN19501_c0_g1; TRINITY_DN23019_c6_g16	PH and SEC7 domain containing protein 3 evidence Inferred from Electronic Annotation
272	Smp_154250.1	15.12	0.62	3.31479	4.06523	TRINITY_DN26743_c0_g1; TRINITY_DN457_c0_g1	ring finger protein unkempt evidence Inferred from Electronic Annotation
275	Smp_175510.1	38.6	2.99	3.31104	5.41244	TRINITY_DN16576_c0_g1; TRINITY_DN23441_c1_g5; TRINITY_DN46479_c0_g1	hypothetical protein evidence Inferred from Electronic Annotation
277	Smp_132470.1	60.49	5.22	3.30537	6.05983	TRINITY_DN23779_c0_g1; TRINITY_DN23779_c0_g17; TRINITY_DN23779_c0_g29	Cathepsin D-like protease 3 with UniProtKB:B0L5P6 evidence Non-traceable Author Statemen
279	Smp_121660.1	25.82	1.73	3.29634	4.83542	TRINITY_DN18318_c0_g1; TRINITY_DN21213_c5_g1; TRINITY_DN21213_c5_g3	IDL peptide evidence Inferred from Electronic Annotation
287	Smp_179290.1	30.81	2.3	3.26894	5.09212	TRINITY_DN16503_c0_g1; TRINITY_DN16503_c0_g2; TRINITY_DN6345_c0_g1; TRINITY_DN6345_c0_g2	ATPase family AAA domain containing protein 2B evidence Inferred from Electronic Annotation
289	Smp_158550.1	16.74	0.85	3.26141	4.21645	TRINITY_DN1288_c0_g1; TRINITY_DN16585_c0_g1	semaphorin 5A evidence Inferred from Electronic Annotation
291	Smp_180810.1	37.89	3.14	3.2317	5.39335	TRINITY_DN18643_c0_g1; TRINITY_DN45641_c0_g1; TRINITY_DN69235_c0_g1	Papilin evidence Inferred from Electronic Annotation
293	Smp_144070.1	40.16	3.43	3.21586	5.47865	TRINITY_DN13799_c0_g1; TRINITY_DN20107_c0_g1; TRINITY_DN28192_c0_g1; TRINITY_DN35276_c0_g1; TRINITY_DN44705_c0_g1	gastric mucin evidence Inferred from Electronic Annotation
299	Smp_134180.1	30.63	2.45	3.19663	5.09085	TRINITY_DN19318_c0_g3; TRINITY_DN25372_c0_g1; TRINITY_DN32635_c0_g1; TRINITY_DN41443_c0_g1; TRINITY_DN46613_c0_g1; TRINITY_DN66480_c0_g1; TRINITY_DN69765_c0_g1	receptor type tyrosine protein phosphatase evidence Inferred from Electronic Annotation,term protein tyrosine phosphatase%2C receptor type%2C D evidence Inferred from Electronic Annotation
300	Smp_062900.1	18.57	1.14	3.19296	4.37226	TRINITY_DN14276_c0_g1; TRINITY_DN66798_c0_g1	tryparedoxin peroxidase evidence Inferred from Electronic Annotation
301	Smp_148940.1	44.78	4.01	3.19183	5.63778	TRINITY_DN12694_c0_g1; TRINITY_DN28656_c0_g1; TRINITY_DN5423_c0_g1; TRINITY_DN56679_c0_g1; TRINITY_DN5947_c0_g1; TRINITY_DN70034_c0_g1	sorting nexin evidence Inferred from Electronic Annotation
303	Smp_000100.1	36.66	3.17	3.17491	5.35156	TRINITY_DN14394_c0_g1; TRINITY_DN5567_c0_g1; TRINITY_DN5567_c0_g2; TRINITY_DN63000_c0_g1; TRINITY_DN63805_c0_g1; TRINITY_DN72385_c0_g1	Actin-binding/filamin-like protein db_xref PMID:18283496 evidence Traceable Author Statemen
304	Smp_138150.1	31.68	2.62	3.17435	5.1416	TRINITY_DN10675_c0_g1; TRINITY_DN14278_c0_g1; TRINITY_DN14278_c0_g2; TRINITY_DN32890_c0_g1; TRINITY_DN9907_c0_g1; TRINITY_DN9907_c0_g3	rho type gtpase activating protein evidence Inferred from Electronic Annotation
308	Smp_171490.1	17.53	1.06	3.16915	4.29205	TRINITY_DN12335_c0_g1; TRINITY_DN23233_c4_g3	Vacuolar protein sorting associated protein 13D evidence Inferred from Electronic Annotation
309	Smp_197770.1	30.19	2.47	3.16808	5.07296	TRINITY_DN14555_c0_g1; TRINITY_DN35495_c0_g1; TRINITY_DN36143_c0_g1; TRINITY_DN42556_c0_g1; TRINITY_DN50474_c0_g1; TRINITY_DN50474_c0_g2; TRINITY_DN5887_c0_g1; TRINITY_DN5887_c0_g2	ERC protein 2 evidence Inferred from Electronic Annotation
315	Smp_108600.1	25.25	1.99	3.1341	4.81967	TRINITY_DN32481_c0_g1; TRINITY_DN61162_c0_g1	hypothetical protein evidence Inferred from Electronic Annotation
316	Smp_176480.1	43.22	4.04	3.1332	5.59276	TRINITY_DN13206_c1_g1; TRINITY_DN18147_c0_g1; TRINITY_DN23882_c0_g16; TRINITY_DN50412_c0_g1; TRINITY_DN64640_c0_g1	myotubularin protein evidence Inferred from Electronic Annotation
317	Smp_160830.1	72.72	7.42	3.13016	6.34234	TRINITY_DN14110_c1_g1; TRINITY_DN1703_c0_g1; TRINITY_DN2371_c0_g1; TRINITY_DN26138_c0_g1; TRINITY_DN28787_c0_g1; TRINITY_DN29220_c0_g1; TRINITY_DN3953_c0_g1; TRINITY_DN4143_c0_g1; TRINITY_DN56709_c0_g1; TRINITY_DN5924_c0_g1; TRINITY_DN5924_c0_g2; TRINITY_DN7009_c0_g1; TRINITY_DN9931_c0_g1	phospholipase d3 evidence Inferred from Electronic Annotation
318	Smp_146640.1	15.25	0.86	3.12707	4.09677	TRINITY_DN10732_c0_g1; TRINITY_DN222_c0_g1	like glycosyltransferase evidence Inferred from Electronic Annotation
320	Smp_161550.1	18.54	1.24	3.12486	4.37712	TRINITY_DN16130_c0_g4; TRINITY_DN16130_c0_g5	adenylyl cyclase associated protein 2 evidence Inferred from Electronic Annotation
321	Smp_084090.1	18.08	1.19	3.12306	4.34127	TRINITY_DN40567_c0_g1; TRINITY_DN49350_c0_g1; TRINITY_DN720_c0_g1	hypothetical protein evidence Inferred from Electronic Annotation
323	Smp_094560.1	17.11	1.1	3.10833	4.26379	TRINITY_DN13037_c0_g1; TRINITY_DN13037_c0_g2; TRINITY_DN9792_c0_g1	Kv4 class voltage gated potassium channel evidence Inferred from Electronic Annotation
329	Smp_143960.2	26.86	2.29	3.08204	4.91409	TRINITY_DN20147_c0_g3; TRINITY_DN34019_c0_g1	hypothetical protein evidence Inferred from Electronic Annotation
330	Smp_153970.1	72.08	7.64	3.08037	6.33485	TRINITY_DN12718_c0_g1; TRINITY_DN12718_c0_g4; TRINITY_DN23409_c0_g5; TRINITY_DN23666_c0_g15; TRINITY_DN23885_c3_g14; TRINITY_DN23885_c3_g16; TRINITY_DN23885_c3_g19; TRINITY_DN23885_c3_g22; TRINITY_DN23885_c3_g25; TRINITY_DN29416_c0_g1; TRINITY_DN4414_c0_g1	RILP protein evidence Inferred from Electronic Annotation
333	Smp_124250.1	14.69	0.87	3.06874	4.04963	TRINITY_DN11064_c0_g1	high affinity cGMP specific 3'%2C5' cyclic evidence Inferred from Electronic Annotation
336	Smp_151670.1	30.48	2.76	3.06563	5.09761	TRINITY_DN22621_c0_g1; TRINITY_DN22621_c0_g2; TRINITY_DN59098_c0_g1	dual specificity mitogen activated protein evidence Inferred from Electronic Annotation
337	Smp_060030.1	17.55	1.22	3.06279	4.30524	TRINITY_DN15499_c0_g1; TRINITY_DN37296_c0_g1	RPE spondin evidence Inferred from Electronic Annotation
341	Smp_127250.1	17.11	1.19	3.04778	4.27053	TRINITY_DN15393_c0_g1; TRINITY_DN66268_c0_g1; TRINITY_DN66268_c0_g2	kinesin associated protein 3 evidence Inferred from Electronic Annotation
343	Smp_203140.1	15.48	1.01	3.03545	4.12846	TRINITY_DN22644_c0_g8; TRINITY_DN5261_c0_g1	Signal peptide protease
344	Smp_157620.1	44.21	4.53	3.03129	5.63633	TRINITY_DN15588_c0_g1; TRINITY_DN20693_c1_g6; TRINITY_DN41075_c0_g1; TRINITY_DN52291_c0_g1; TRINITY_DN9511_c0_g1	Netrin receptor DCC evidence Inferred from Electronic Annotation
351	Smp_164340.1	144.21	16.97	3.01448	7.34145	TRINITY_DN10710_c0_g1; TRINITY_DN12879_c0_g1; TRINITY_DN15596_c0_g1; TRINITY_DN17495_c0_g1; TRINITY_DN17495_c0_g2; TRINITY_DN17495_c0_g3; TRINITY_DN18174_c0_g4; TRINITY_DN21070_c1_g7; TRINITY_DN23302_c0_g11; TRINITY_DN23302_c0_g14; TRINITY_DN23302_c0_g2; TRINITY_DN23302_c0_g24; TRINITY_DN23302_c0_g4; TRINITY_DN23302_c0_g7; TRINITY_DN23352_c0_g2; TRINITY_DN5602_c0_g1; TRINITY_DN5602_c0_g2; TRINITY…	Afadin evidence Inferred from Electronic Annotation
354	Smp_197640.1	22.77	1.96	3.00547	4.68538	TRINITY_DN10560_c0_g1; TRINITY_DN65487_c0_g1	sodium leak channel non selective protein evidence Inferred from Electronic Annotation
358	Smp_122980.1	25.79	2.36	2.99516	4.86542	TRINITY_DN13501_c0_g1; TRINITY_DN8876_c0_g1	KLHL5 protein evidence Inferred from Electronic Annotation
359	Smp_161670.1	556.15	68.89	2.99491	9.29011	TRINITY_DN13156_c0_g1; TRINITY_DN2292_c0_g1; TRINITY_DN45534_c0_g1	beige:beach protein evidence Inferred from Electronic Annotation
360	Smp_000830.1	27.29	2.55	2.9944	4.94673	TRINITY_DN15816_c1_g2; TRINITY_DN62227_c0_g1	homeobox protein smox-3 db_xref PMID:1356008 evidence Traceable Author Statemen
362	Smp_162520.1	17.24	1.31	2.98114	4.2891	TRINITY_DN20911_c0_g1	protocadherin fat 4 evidence Inferred from Electronic Annotation
365	Smp_144390.1	26.07	2.45	2.97203	4.88362	TRINITY_DN15026_c0_g1; TRINITY_DN54120_c0_g1; TRINITY_DN68914_c0_g1; TRINITY_DN9094_c0_g1; TRINITY_DN9094_c0_g2	activin A receptor%2C type IIA evidence Inferred from Electronic Annotation
371	Smp_156300.1	23.55	2.16	2.95773	4.73931	TRINITY_DN10665_c0_g1; TRINITY_DN26184_c0_g1	WD repeat containing protein 90 evidence Inferred from Electronic Annotation
379	Smp_139090.2	15.14	1.1	2.94218	4.10769	TRINITY_DN27887_c0_g1; TRINITY_DN72615_c0_g1	DENN domain containing protein 5B evidence Inferred from Electronic Annotation
380	Smp_028910.1	39.25	4.24	2.94135	5.47541	TRINITY_DN23831_c0_g14; TRINITY_DN23831_c0_g15; TRINITY_DN23831_c0_g6; TRINITY_DN23831_c0_g7	alpha(13)fucosyltransferase evidence Inferred from Electronic Annotation
383	Smp_143610.1	24.1	2.27	2.94032	4.77452	TRINITY_DN24036_c0_g1; TRINITY_DN24036_c0_g2; TRINITY_DN28011_c0_g1; TRINITY_DN37836_c0_g1; TRINITY_DN41051_c0_g1; TRINITY_DN65752_c0_g1; TRINITY_DN9432_c0_g1	hypothetical protein evidence Inferred from Electronic Annotation
385	Smp_152960.1	15.06	1.1	2.93501	4.10098	TRINITY_DN19101_c0_g2; TRINITY_DN20708_c0_g1	rab effector MyRIP evidence Inferred from Electronic Annotation
386	Smp_139800.1	33.04	3.46	2.93212	5.22882	TRINITY_DN13401_c0_g1; TRINITY_DN16119_c1_g1; TRINITY_DN16119_c1_g2; TRINITY_DN27969_c0_g1; TRINITY_DN28824_c0_g1; TRINITY_DN34235_c0_g1	rho associated protein kinase 1 evidence Inferred from Electronic Annotation
389	Smp_128560.1	21.68	1.98	2.92804	4.6241	TRINITY_DN23769_c4_g2; TRINITY_DN23769_c4_g3; TRINITY_DN69523_c0_g1	smile protein evidence Inferred from Electronic Annotation
392	Smp_172040.1	39.95	4.41	2.92016	5.50335	TRINITY_DN26573_c0_g1; TRINITY_DN52368_c0_g1; TRINITY_DN53384_c0_g1; TRINITY_DN67837_c0_g1; TRINITY_DN67940_c0_g1; TRINITY_DN68020_c0_g1; TRINITY_DN69813_c0_g1	protein unc 13 B evidence Inferred from Electronic Annotation
393	Smp_165530.1	14.5	1.05	2.91857	4.04876	TRINITY_DN17697_c3_g2; TRINITY_DN32320_c0_g1; TRINITY_DN63979_c0_g1	rho GTPase activating protein 20 evidence Inferred from Electronic Annotation
395	Smp_155050.1	41.25	4.62	2.91031	5.55059	TRINITY_DN12489_c0_g1; TRINITY_DN14811_c0_g1; TRINITY_DN20204_c1_g12; TRINITY_DN23239_c0_g1; TRINITY_DN46537_c0_g1; TRINITY_DN8438_c0_g1; TRINITY_DN8438_c0_g2; TRINITY_DN9304_c0_g1; TRINITY_DN9304_c0_g2; TRINITY_DN9510_c1_g1	agrin evidence Inferred from Electronic Annotation
396	Smp_159740.1	43.19	4.88	2.90983	5.61677	TRINITY_DN10835_c0_g1; TRINITY_DN11509_c0_g1; TRINITY_DN14709_c0_g1; TRINITY_DN15283_c0_g1; TRINITY_DN1556_c0_g1; TRINITY_DN1556_c0_g2; TRINITY_DN29453_c0_g1	solute carrier family 33 evidence Inferred from Electronic Annotation
397	Smp_163920.1	24.72	2.43	2.90661	4.81506	TRINITY_DN21505_c0_g1; TRINITY_DN24322_c0_g1; TRINITY_DN42416_c0_g1; TRINITY_DN4254_c0_g1; TRINITY_DN48918_c0_g1; TRINITY_DN5573_c0_g1	hemicentin 1 evidence Inferred from Electronic Annotation
402	Smp_172460.1	25.89	2.64	2.88506	4.88411	TRINITY_DN434_c0_g1; TRINITY_DN434_c0_g2	Krueppel factor 10 like evidence Inferred from Electronic Annotation
403	Smp_059210.7	18.05	1.58	2.88435	4.36667	TRINITY_DN22967_c0_g2; TRINITY_DN22967_c0_g3	hypothetical protein evidence Inferred from Electronic Annotation
404	Smp_126540.2	40.83	4.67	2.88312	5.53916	TRINITY_DN10301_c0_g1; TRINITY_DN10301_c0_g2; TRINITY_DN10301_c0_g3; TRINITY_DN10301_c0_g4; TRINITY_DN15032_c0_g1; TRINITY_DN31395_c0_g1; TRINITY_DN59141_c0_g1	-
406	Smp_156180.1	45.7	5.34	2.88087	5.70155	TRINITY_DN11293_c1_g1; TRINITY_DN20243_c0_g1; TRINITY_DN23510_c0_g2; TRINITY_DN23706_c5_g4; TRINITY_DN33103_c0_g1; TRINITY_DN65396_c0_g1	hypothetical protein evidence Inferred from Electronic Annotation
412	Smp_246410.1	37.04	4.24	2.85988	5.4019	TRINITY_DN16325_c0_g3; TRINITY_DN16325_c0_g4; TRINITY_DN17771_c0_g1; TRINITY_DN23896_c5_g20; TRINITY_DN27535_c0_g1	histone lysine N methyltransferase MLL5 evidence Inferred from Electronic Annotation
414	Smp_111340.1	29.34	3.21	2.84933	5.06824	TRINITY_DN19973_c0_g1	hypothetical protein evidence Inferred from Electronic Annotation
421	Smp_247830.1	57.09	7.19	2.82635	6.02857	TRINITY_DN16878_c0_g2; TRINITY_DN20004_c0_g1; TRINITY_DN22639_c0_g2; TRINITY_DN22639_c0_g3; TRINITY_DN7325_c0_g1	-
422	Smp_157560.1	15.55	1.34	2.82225	4.16108	TRINITY_DN10330_c0_g1; TRINITY_DN10330_c0_g2; TRINITY_DN19959_c0_g2	CAS1 domain containing 1 evidence Inferred from Electronic Annotation
430	Smp_142550.1	110.57	14.87	2.81358	6.98231	TRINITY_DN16389_c0_g2; TRINITY_DN18422_c0_g4; TRINITY_DN23886_c5_g1; TRINITY_DN34344_c0_g1; TRINITY_DN66448_c0_g1	nuclear pore membrane evidence Inferred from Electronic Annotation
436	Smp_045010.1	64.63	8.46	2.79444	6.21121	TRINITY_DN16483_c0_g1; TRINITY_DN29301_c0_g1	tegument-allergen-like protein evidence Inferred from Experimen
437	Smp_169800.1	45.53	5.71	2.79378	5.70708	TRINITY_DN13338_c0_g1; TRINITY_DN21729_c0_g1; TRINITY_DN67314_c0_g1; TRINITY_DN69264_c0_g1	transforming growth factor beta evidence Inferred from Electronic Annotation
438	Smp_175050.1	65.9	8.67	2.79042	6.23974	TRINITY_DN17425_c2_g1; TRINITY_DN4240_c0_g2; TRINITY_DN52596_c0_g1	Fibronectin type III domain containing protein evidence Inferred from Electronic Annotation
439	Smp_000320.1	22.55	2.41	2.78788	4.69822	TRINITY_DN1275_c0_g1; TRINITY_DN17764_c0_g1; TRINITY_DN17764_c0_g4; TRINITY_DN17764_c0_g5; TRINITY_DN19724_c10_g12; TRINITY_DN40524_c0_g1	hypothetical protein evidence Inferred from Electronic Annotation
440	Smp_148130.1	21.37	2.24	2.7875	4.62117	TRINITY_DN18714_c0_g1; TRINITY_DN61896_c0_g1	fas binding factor 1 evidence Inferred from Electronic Annotation
443	Smp_244620.1	20.57	2.15	2.7756	4.56803	TRINITY_DN13759_c0_g3; TRINITY_DN17697_c0_g1; TRINITY_DN17697_c0_g2; TRINITY_DN2298_c0_g1; TRINITY_DN23902_c14_g17; TRINITY_DN23902_c14_g20; TRINITY_DN41260_c0_g1	hypothetical protein evidence Inferred from Electronic Annotation
445	Smp_157020.1	46.52	5.99	2.76517	5.74174	TRINITY_DN11471_c0_g1; TRINITY_DN11471_c0_g2; TRINITY_DN11471_c0_g3; TRINITY_DN15623_c0_g1; TRINITY_DN15623_c0_g2; TRINITY_DN16040_c0_g1; TRINITY_DN20005_c0_g1; TRINITY_DN21409_c0_g2; TRINITY_DN32706_c0_g1; TRINITY_DN59945_c0_g1; TRINITY_DN61625_c0_g1; TRINITY_DN6587_c0_g1; TRINITY_DN8616_c0_g1; TRINITY_DN8616_c0_g2	titin evidence Inferred from Electronic Annotation
454	Smp_083240.1	288.3	42.07	2.74781	8.3723	TRINITY_DN18505_c0_g1	hypothetical protein evidence Inferred from Electronic Annotation
455	Smp_202130.1	1451.58	215.77	2.74438	10.7042	TRINITY_DN21592_c0_g1	hypothetical protein evidence Inferred from Electronic Annotation
457	Smp_153990.1	120	17.11	2.74015	7.10967	TRINITY_DN19602_c0_g1; TRINITY_DN23019_c6_g2	LIM domain and actin binding protein 1 evidence Inferred from Electronic Annotation
462	Smp_138960.1	14.99	1.42	2.72409	4.12184	TRINITY_DN3196_c0_g1; TRINITY_DN45425_c0_g1	erlin 2 evidence Inferred from Electronic Annotation
463	Smp_121190.1	20.02	2.19	2.72013	4.53667	TRINITY_DN16568_c0_g1; TRINITY_DN16568_c0_g2; TRINITY_DN32665_c0_g1	voltage gated potassium channel evidence Inferred from Electronic Annotation
464	Smp_246790.1	23.85	2.78	2.71679	4.78816	TRINITY_DN23752_c2_g1; TRINITY_DN3202_c0_g1; TRINITY_DN39880_c0_g1; TRINITY_DN44960_c0_g1; TRINITY_DN7553_c0_g1	transient receptor potential cation channel evidence Inferred from Electronic Annotation
466	Smp_137940.1	81.54	11.6	2.71167	6.55674	TRINITY_DN19660_c0_g1	guanylate kinase evidence Inferred from Electronic Annotation
468	Smp_164930.1	23.27	2.71	2.70968	4.75382	TRINITY_DN15067_c0_g1; TRINITY_DN21867_c0_g2; TRINITY_DN21909_c8_g9	activated cdc42 kinase 1 evidence Inferred from Electronic Annotation
471	Smp_133040.1	20.87	2.36	2.70242	4.59872	TRINITY_DN10742_c0_g1; TRINITY_DN13993_c0_g5; TRINITY_DN33512_c0_g1; TRINITY_DN51939_c0_g1	general transcription factor 3C polypeptide evidence Inferred from Electronic Annotation
473	Smp_171020.1	18.42	1.99	2.69933	4.42021	TRINITY_DN2204_c0_g1; TRINITY_DN57919_c0_g1	calsyntenin evidence Inferred from Electronic Annotation
476	Smp_198360.1	16.56	1.71	2.69593	4.26828	TRINITY_DN17598_c0_g2; TRINITY_DN4188_c0_g1; TRINITY_DN4188_c0_g2; TRINITY_DN58014_c0_g1	ankyrin repeat and death domain containing protein evidence Inferred from Electronic Annotation
477	Smp_244380.1	27.84	3.46	2.69296	5.01346	TRINITY_DN2043_c0_g1; TRINITY_DN2043_c0_g2; TRINITY_DN40726_c0_g1; TRINITY_DN6076_c0_g1; TRINITY_DN61814_c0_g1; TRINITY_DN67286_c0_g1; TRINITY_DN67449_c0_g1; TRINITY_DN67449_c0_g2; TRINITY_DN68256_c0_g1; TRINITY_DN69319_c0_g1	transformation:transcription domain associated evidence Inferred from Electronic Annotation
478	Smp_243000.1	20.5	2.34	2.68642	4.57531	TRINITY_DN16005_c0_g1; TRINITY_DN5631_c0_g1; TRINITY_DN5631_c0_g2	G protein-coupled receptor evidence Inferred from Electronic Annotation
480	Smp_202970.1	199.57	30.22	2.68356	7.85044	TRINITY_DN15420_c0_g1	cytoplasmic actin evidence Inferred from Electronic Annotation
481	Smp_196590.1	92.73	13.59	2.68353	6.74578	TRINITY_DN13137_c0_g1; TRINITY_DN2317_c0_g3	bromo adjacent y domain containing protein evidence Inferred from Electronic Annotation
482	Smp_132670.1	162.49	24.45	2.68346	7.55413	TRINITY_DN21891_c0_g1	myosin regulatory light chain 2 smooth muscle
483	Smp_145700.1	52.69	7.38	2.67963	5.93239	TRINITY_DN21604_c0_g1; TRINITY_DN22898_c0_g1; TRINITY_DN22898_c0_g2; TRINITY_DN45116_c0_g1; TRINITY_DN59594_c0_g1	ankyrin :unc evidence Inferred from Electronic Annotation
485	Smp_244160.1	53.81	7.59	2.67371	5.96347	TRINITY_DN18710_c0_g1	dynein light chain Tctex-type%2C putative evidence Inferred from Electronic Annotation
487	Smp_159990.1	37.97	5.11	2.67312	5.46205	TRINITY_DN119_c0_g1; TRINITY_DN119_c0_g2; TRINITY_DN20609_c0_g1; TRINITY_DN26212_c0_g1; TRINITY_DN42624_c0_g1; TRINITY_DN66274_c0_g1	Voltage gated calcium channel%2C L type%2C alpha evidence Inferred from Electronic Annotation
488	Smp_162440.1	26.78	3.36	2.67165	4.9607	TRINITY_DN17329_c0_g1	mechanosensory protein 2 evidence Inferred from Electronic Annotation
491	Smp_142510.1	17.06	1.84	2.66884	4.3147	TRINITY_DN14280_c0_g1; TRINITY_DN25803_c0_g1; TRINITY_DN54397_c0_g1	ribonuclease III%2C putative
493	Smp_173060.1	18.4	2.06	2.66445	4.42358	TRINITY_DN18215_c0_g1; TRINITY_DN18215_c0_g2; TRINITY_DN5098_c0_g1	rho guanine nucleotide evidence Inferred from Electronic Annotation
494	Smp_122680.1	50.83	7.18	2.66361	5.88289	TRINITY_DN18155_c0_g1; TRINITY_DN25446_c0_g1; TRINITY_DN40492_c0_g1	oligophrenin 1 evidence Inferred from Electronic Annotation
496	Smp_174960.1	13.89	1.36	2.65748	4.02237	TRINITY_DN20137_c2_g1; TRINITY_DN28307_c0_g1; TRINITY_DN56098_c0_g1	merlin:moesin:ezrin:radixin evidence Inferred from Electronic Annotation
499	Smp_243930.2	18.71	2.13	2.65469	4.4489	TRINITY_DN14824_c1_g1; TRINITY_DN20204_c1_g2; TRINITY_DN20204_c1_g6	-
502	Smp_246520.1	70.66	10.4	2.65213	6.35861	TRINITY_DN17431_c0_g1; TRINITY_DN23897_c5_g3; TRINITY_DN4961_c0_g3; TRINITY_DN57342_c0_g1	LRP2 binding protein evidence Inferred from Electronic Annotation
503	Smp_159840.1	41.24	5.72	2.65208	5.58376	TRINITY_DN12792_c0_g1; TRINITY_DN1735_c0_g1; TRINITY_DN21798_c1_g1; TRINITY_DN31492_c0_g1; TRINITY_DN32887_c0_g1; TRINITY_DN41678_c0_g1	dynein heavy chain evidence Inferred from Electronic Annotation
507	Smp_157691.1	33.38	4.51	2.64145	5.28133	TRINITY_DN14290_c0_g1; TRINITY_DN63019_c0_g1	-
508	Smp_200240.1	51.13	7.38	2.63709	5.89506	TRINITY_DN20424_c0_g1	universal stress protein evidence Inferred from Electronic Annotation
509	Smp_140820.1	29.44	3.92	2.62924	5.10266	TRINITY_DN23393_c1_g4; TRINITY_DN32232_c0_g1	hypothetical protein evidence Inferred from Electronic Annotation
510	Smp_163840.1	112.02	17.38	2.62037	7.0268	TRINITY_DN23249_c0_g3	protein fam79a evidence Inferred from Electronic Annotation
511	Smp_213120.1	39.38	5.57	2.61968	5.52199	TRINITY_DN23563_c1_g1; TRINITY_DN39168_c0_g1	etoposide induced protein 2 evidence Inferred from Electronic Annotation
512	Smp_211320.1	131.16	20.51	2.61921	7.25427	TRINITY_DN22612_c0_g2	soluble guanylate cyclase gcy evidence Inferred from Electronic Annotation
517	Smp_137170.1	17.36	2.01	2.60873	4.34837	TRINITY_DN10770_c0_g1; TRINITY_DN11992_c0_g1; TRINITY_DN4703_c0_g2	plasma membrane calcium transporting ATPase evidence Inferred from Electronic Annotation
518	Smp_128790.1	16.67	1.9	2.60718	4.29057	TRINITY_DN14669_c0_g1; TRINITY_DN23666_c0_g2; TRINITY_DN55570_c0_g1	Non-specific protein-tyrosine kinase with UniProtKB:D1H0Y8 evidence Non-traceable Author Statemen
522	Smp_246430.1	32.98	4.58	2.60635	5.26903	TRINITY_DN3779_c0_g1; TRINITY_DN3779_c0_g2; TRINITY_DN43979_c0_g1; TRINITY_DN68367_c0_g1	liprin alpha 2 evidence Inferred from Electronic Annotation
523	Smp_246180.1	68.11	10.37	2.60366	6.31252	TRINITY_DN20257_c0_g1; TRINITY_DN23787_c2_g21; TRINITY_DN23887_c11_g17; TRINITY_DN37924_c0_g1	DEP domain containing protein evidence Inferred from Electronic Annotation
530	Smp_167340.1	55.6	8.43	2.58547	6.02303	TRINITY_DN32955_c0_g1; TRINITY_DN40917_c0_g1; TRINITY_DN55504_c0_g1	hypothetical protein evidence Inferred from Electronic Annotation
531	Smp_128600.1	24.56	3.26	2.58496	4.849	TRINITY_DN23734_c2_g13; TRINITY_DN46669_c0_g1; TRINITY_DN52415_c0_g1; TRINITY_DN6064_c0_g1	chromodomain helicase dna binding protein 5 evidence Inferred from Electronic Annotation
535	Smp_150300.1	34.22	4.88	2.58251	5.32553	TRINITY_DN18686_c0_g1; TRINITY_DN20123_c0_g2; TRINITY_DN20239_c0_g3; TRINITY_DN20882_c3_g3; TRINITY_DN35762_c0_g1	MAP kinase activating death domain evidence Inferred from Electronic Annotation
536	Smp_047650.1	558.32	92.94	2.57386	9.3493	TRINITY_DN18729_c0_g1	Ferritin-2 heavy chain db_xref PMID:1741011 evidence Traceable Author Statemen
537	Smp_174240.1	70.25	10.97	2.57347	6.36142	TRINITY_DN21447_c0_g2; TRINITY_DN21447_c0_g4; TRINITY_DN21447_c0_g5; TRINITY_DN22583_c2_g1; TRINITY_DN23909_c18_g3	hypothetical protein evidence Inferred from Electronic Annotation
538	Smp_155720.1	18.64	2.3	2.57326	4.45549	TRINITY_DN10665_c0_g2; TRINITY_DN16334_c0_g1; TRINITY_DN23746_c2_g1	glycogen synthase kinase 3 evidence Inferred from Electronic Annotation
541	Smp_078550.1	48.82	7.4	2.56826	5.83845	TRINITY_DN22644_c0_g1; TRINITY_DN22644_c0_g13; TRINITY_DN22644_c0_g2; TRINITY_DN22644_c0_g3; TRINITY_DN22644_c0_g6; TRINITY_DN64970_c0_g1; TRINITY_DN64970_c0_g2	zinc finger protein Xfin evidence Inferred from Electronic Annotation
544	Smp_073270.1	85.96	13.73	2.56159	6.65378	TRINITY_DN21328_c1_g1	neuroendocrine protein 7b2 evidence Inferred from Electronic Annotation
547	Smp_140310.1	23.75	3.2	2.55897	4.80478	TRINITY_DN21960_c0_g3	paxillin evidence Inferred from Electronic Annotation
549	Smp_051400.1	14.4	1.64	2.54432	4.09085	TRINITY_DN15391_c0_g1	dynein light chain evidence Inferred from Electronic Annotation
550	Smp_157380.1	92.09	15	2.54055	6.75609	TRINITY_DN18821_c0_g1; TRINITY_DN18821_c0_g2; TRINITY_DN18821_c0_g3; TRINITY_DN19559_c0_g1; TRINITY_DN19654_c0_g1; TRINITY_DN20958_c0_g1; TRINITY_DN21967_c0_g1; TRINITY_DN67952_c0_g1	hypothetical protein evidence Inferred from Electronic Annotation
552	Smp_137680.1	13.5	1.5	2.53605	4	TRINITY_DN20362_c0_g1; TRINITY_DN8871_c0_g1	hypothetical protein evidence Inferred from Electronic Annotation
554	Smp_159750.1	31.36	4.58	2.53587	5.20711	TRINITY_DN22478_c0_g1; TRINITY_DN32411_c0_g1; TRINITY_DN50552_c0_g2; TRINITY_DN67196_c0_g1	vacuolar protein sorting associated protein 54 evidence Inferred from Electronic Annotation
556	Smp_121920.1	37.15	5.6	2.53115	5.45121	TRINITY_DN19441_c0_g1; TRINITY_DN35938_c0_g1	vesicular amine transporter evidence Inferred from Electronic Annotation
560	Smp_028030.1	28.07	4.03	2.5309	5.04876	TRINITY_DN13420_c0_g1; TRINITY_DN15531_c0_g1; TRINITY_DN38787_c0_g1; TRINITY_DN68461_c0_g1; TRINITY_DN9847_c0_g1	slit robo rho gtpase activating protein 1 evidence Inferred from Electronic Annotation
562	Smp_164810.1	17.69	2.25	2.52375	4.38819	TRINITY_DN13723_c0_g1; TRINITY_DN19724_c1_g1; TRINITY_DN40764_c0_g1	tyrosine protein kinase Fps85D with UniProtKB:Q7YSY1 evidence Non-traceable Author Statemen
563	Smp_033000.1	712.09	123.12	2.52235	9.70772	TRINITY_DN11783_c0_g1; TRINITY_DN11783_c0_g2	calcium-binding protein db_xref PMID:2710168 evidence Traceable Author Statemen
564	Smp_085540.2	107.45	17.88	2.5221	6.98105	TRINITY_DN23880_c0_g1; TRINITY_DN23880_c0_g2; TRINITY_DN24323_c0_g1	myosin heavy chain db_xref PMID:8459827 evidence Traceable Author Statemen
565	Smp_019170.1	24.33	3.42	2.51873	4.84549	TRINITY_DN12838_c0_g1; TRINITY_DN61127_c0_g1; TRINITY_DN8651_c0_g2; TRINITY_DN8651_c0_g3	lysine specific demethylase lid evidence Inferred from Electronic Annotation
568	Smp_246170.1	17.56	2.26	2.50925	4.3799	TRINITY_DN14053_c0_g1; TRINITY_DN14053_c0_g2	Leucine rich repeat domain containing protein with InterPro:IPR032675 evidence Inferred from Sequence Model
570	Smp_086330.1	160.43	27.49	2.50238	7.56163	TRINITY_DN22611_c1_g3	Myophilin evidence Inferred from Electronic Annotation
571	Smp_155400.1	20.86	2.86	2.50162	4.62761	TRINITY_DN1819_c0_g1; TRINITY_DN1819_c0_g2; TRINITY_DN29406_c0_g1; TRINITY_DN8539_c0_g1	eukaryotic translation initiation factor evidence Inferred from Electronic Annotation
572	Smp_244100.1	17.38	2.25	2.49963	4.36667	TRINITY_DN11032_c0_g1; TRINITY_DN16781_c0_g1; TRINITY_DN20778_c2_g2; TRINITY_DN20778_c2_g9; TRINITY_DN23909_c16_g2; TRINITY_DN7703_c0_g1	UBX domain containing protein evidence Inferred from Electronic Annotation
573	Smp_210550.1	176.45	30.42	2.49766	7.69954	TRINITY_DN18635_c0_g1	tyrosyl DNA phosphodiesterase 2 evidence Inferred from Electronic Annotation
575	Smp_213910.1	19.74	2.68	2.49464	4.54967	TRINITY_DN14943_c0_g1; TRINITY_DN15159_c0_g1; TRINITY_DN3608_c0_g1; TRINITY_DN8169_c0_g1; TRINITY_DN8169_c0_g2	type IV collagen alpha 1 chain evidence Inferred from Electronic Annotation
576	Smp_131690.1	42.41	6.71	2.49322	5.64731	TRINITY_DN15286_c0_g2; TRINITY_DN23874_c6_g1; TRINITY_DN23874_c6_g19; TRINITY_DN23874_c6_g28; TRINITY_DN31906_c0_g1; TRINITY_DN48536_c0_g1	peripheral plasma membrane protein CASK evidence Inferred from Electronic Annotation
577	Smp_124910.1	18.47	2.46	2.49241	4.45483	TRINITY_DN11586_c0_g1; TRINITY_DN11586_c0_g2; TRINITY_DN11586_c0_g3; TRINITY_DN26849_c0_g1; TRINITY_DN44507_c0_g1	protein stoned B evidence Inferred from Electronic Annotation
580	Smp_174810.1	61.97	10.2	2.49117	6.19318	TRINITY_DN21086_c0_g1	Extracellular superoxide dismutase (Cu Zn) evidence Inferred from Electronic Annotation
585	Smp_078920.1	13.38	1.57	2.48422	3.99548	TRINITY_DN40753_c0_g1; TRINITY_DN43776_c0_g1; TRINITY_DN60947_c0_g1	condensin complex subunit 3 evidence Inferred from Electronic Annotation
586	Smp_141860.1	27.05	4.02	2.48224	5.00315	TRINITY_DN12144_c0_g1; TRINITY_DN12144_c0_g2; TRINITY_DN13160_c0_g1; TRINITY_DN13160_c0_g2; TRINITY_DN1610_c0_g1; TRINITY_DN1610_c0_g2; TRINITY_DN21909_c3_g3; TRINITY_DN48418_c0_g1	protein furry evidence Inferred from Electronic Annotation
587	Smp_246620.1	38.56	6.11	2.47612	5.51317	TRINITY_DN36808_c0_g1; TRINITY_DN41405_c0_g1; TRINITY_DN46569_c0_g1; TRINITY_DN69942_c0_g1; TRINITY_DN8239_c0_g1; TRINITY_DN8279_c0_g1; TRINITY_DN8279_c0_g2	serine:threonine protein kinase WNK1 evidence Inferred from Electronic Annotation
589	Smp_034850.1	46.64	7.57	2.47481	5.78686	TRINITY_DN17775_c0_g1	TWiK family of potassium channels protein 7 evidence Inferred from Electronic Annotation
590	Smp_073450.1	71.45	12.07	2.47073	6.40122	TRINITY_DN1453_c0_g1; TRINITY_DN1453_c0_g2; TRINITY_DN23026_c0_g1; TRINITY_DN23026_c0_g2; TRINITY_DN23778_c0_g3; TRINITY_DN70343_c0_g1	hypothetical protein evidence Inferred from Electronic Annotation
594	Smp_245440.1	15.67	2.03	2.45986	4.22497	TRINITY_DN17989_c0_g1; TRINITY_DN2487_c0_g1; TRINITY_DN58530_c0_g1; TRINITY_DN72314_c0_g1	-
597	Smp_199260.1	31.5	4.93	2.45434	5.22612	TRINITY_DN23308_c2_g4; TRINITY_DN23308_c2_g5; TRINITY_DN2384_c0_g1; TRINITY_DN2384_c0_g2	vesicular amine transporter evidence Inferred from Electronic Annotation
601	Smp_015020.1	64	10.89	2.45069	6.24584	TRINITY_DN10372_c0_g1; TRINITY_DN10372_c0_g2; TRINITY_DN20623_c0_g2; TRINITY_DN34981_c0_g1; TRINITY_DN4427_c0_g1; TRINITY_DN60359_c0_g1	sodium potassium transporting ATPase alpha subunit with UniProtKB:Q95WT4 evidence Non-traceable Author Statemen
606	Smp_054200.1	188.23	33.85	2.44091	7.80142	TRINITY_DN23856_c2_g11; TRINITY_DN23856_c2_g2; TRINITY_DN23856_c2_g20; TRINITY_DN23856_c2_g24; TRINITY_DN23856_c2_g3; TRINITY_DN23856_c2_g5; TRINITY_DN47811_c0_g1; TRINITY_DN47811_c0_g2; TRINITY_DN47839_c0_g1; TRINITY_DN47839_c0_g2	NADH ubiquinone oxidoreductase sgdh subunit evidence Inferred from Electronic Annotation
607	Smp_144170.1	13.52	1.68	2.43774	4.01792	TRINITY_DN56029_c0_g1; TRINITY_DN56630_c0_g1; TRINITY_DN5914_c0_g1	nuclear receptor subfamily 1 db_xref PMID:17173548 evidence Traceable Author Statemen
611	Smp_148120.1	19.37	2.79	2.42618	4.53356	TRINITY_DN16696_c0_g1; TRINITY_DN18062_c0_g1; TRINITY_DN18062_c0_g3; TRINITY_DN27365_c0_g1	RNA binding protein 16 evidence Inferred from Electronic Annotation
612	Smp_009800.1	42.65	7.14	2.42288	5.66647	TRINITY_DN19961_c0_g1; TRINITY_DN61284_c0_g1; TRINITY_DN66700_c0_g1	serine:threonine protein kinase Nek10 evidence Inferred from Electronic Annotation
615	Smp_176090.1	21.07	3.12	2.42137	4.65478	TRINITY_DN1592_c0_g1; TRINITY_DN18162_c0_g2; TRINITY_DN22583_c7_g3	f box:lrr repeat protein 4 evidence Inferred from Electronic Annotation
616	Smp_180520.1	53.25	9.14	2.41957	5.98618	TRINITY_DN11591_c0_g1; TRINITY_DN20169_c3_g16; TRINITY_DN23885_c3_g15; TRINITY_DN23885_c3_g26; TRINITY_DN23909_c19_g2; TRINITY_DN59232_c0_g1	myotubularin protein evidence Inferred from Electronic Annotation
618	Smp_147670.1	30.58	4.91	2.41778	5.18943	TRINITY_DN13228_c0_g1; TRINITY_DN13228_c0_g2; TRINITY_DN22278_c0_g1	Receptor kinase I-interacting protein SIP db_xref PMID:11356521 evidence Traceable Author Statemen
619	Smp_012380.1	29.83	4.77	2.41769	5.15381	TRINITY_DN20491_c0_g1; TRINITY_DN22018_c5_g12; TRINITY_DN22671_c5_g1	voltage gated potassium channel subunit beta 2 evidence Inferred from Electronic Annotation
620	Smp_134910.1	24.83	3.84	2.41597	4.89093	TRINITY_DN28265_c0_g1; TRINITY_DN46243_c0_g1; TRINITY_DN46243_c0_g2; TRINITY_DN49978_c0_g1; TRINITY_DN51107_c0_g1; TRINITY_DN64797_c0_g1	serine:threonine protein kinase evidence Inferred from Electronic Annotation
621	Smp_133990.2	21.2	3.16	2.4159	4.66448	TRINITY_DN19004_c0_g1; TRINITY_DN19004_c0_g2; TRINITY_DN64539_c0_g1	DNA topoisomerase 2 binding protein 1 evidence Inferred from Electronic Annotation
622	Smp_172490.1	33.41	5.46	2.41322	5.31723	TRINITY_DN22092_c4_g1; TRINITY_DN23666_c0_g11; TRINITY_DN23666_c0_g4; TRINITY_DN23666_c0_g5; TRINITY_DN4791_c0_g1	hypothetical protein evidence Inferred from Electronic Annotation
623	Smp_181230.1	49.44	8.48	2.41161	5.88069	TRINITY_DN14903_c0_g1; TRINITY_DN34855_c0_g1; TRINITY_DN3919_c0_g1; TRINITY_DN4506_c0_g1; TRINITY_DN4506_c0_g2; TRINITY_DN53382_c0_g1	phospholipid transporting atpase evidence Inferred from Electronic Annotation
627	Smp_137080.1	43.4	7.35	2.41071	5.69349	TRINITY_DN23511_c0_g1; TRINITY_DN9830_c0_g2; TRINITY_DN9830_c0_g3	ATP binding cassette subfamily B (MDR:TAP) evidence Inferred from Electronic Annotation
633	Smp_071050.1	99.56	18.12	2.3949	6.89093	TRINITY_DN15562_c0_g1	hypothetical protein evidence Inferred from Electronic Annotation
636	Smp_126760.1	39.78	6.78	2.39002	5.57168	TRINITY_DN11047_c0_g1; TRINITY_DN11047_c0_g2; TRINITY_DN20661_c0_g1; TRINITY_DN47139_c0_g1; TRINITY_DN9183_c0_g1	Proteasome activator complex subunit 4 evidence Inferred from Electronic Annotation
637	Smp_123320.1	23.81	3.74	2.38796	4.83542	TRINITY_DN20073_c0_g3; TRINITY_DN21213_c14_g1; TRINITY_DN21956_c1_g5; TRINITY_DN23084_c1_g8; TRINITY_DN23140_c2_g4; TRINITY_DN5211_c0_g1; TRINITY_DN792_c0_g1; TRINITY_DN8801_c0_g1	chromodomain helicase DNA binding protein evidence Inferred from Electronic Annotation
638	Smp_242240.1	19.88	2.99	2.38766	4.57713	TRINITY_DN23225_c0_g2	Insulin growth factor binding protein 7 evidence Inferred from Electronic Annotation
640	Smp_150660.1	15.93	2.24	2.38552	4.26078	TRINITY_DN23303_c4_g5; TRINITY_DN27270_c0_g1; TRINITY_DN49620_c0_g1; TRINITY_DN50703_c0_g1	phosphatidylinositol 4 kinase evidence Inferred from Electronic Annotation
643	Smp_152840.1	45.94	8	2.38282	5.77979	TRINITY_DN14248_c0_g1; TRINITY_DN6156_c1_g1	ATP dependent RNA helicase DHX36 evidence Inferred from Electronic Annotation
645	Smp_152330.1	20.09	3.06	2.37701	4.59395	TRINITY_DN16177_c0_g1; TRINITY_DN23765_c2_g10; TRINITY_DN67461_c0_g1	cAMP dependent protein kinase catalytic subunit db_xref PMID:19707280 evidence Traceable Author Statemen
652	Smp_074150.1	793.26	153.28	2.36406	9.88804	TRINITY_DN23736_c0_g1; TRINITY_DN23736_c0_g13; TRINITY_DN23736_c0_g14; TRINITY_DN23736_c0_g17; TRINITY_DN23736_c0_g18; TRINITY_DN23736_c0_g19; TRINITY_DN23736_c0_g2; TRINITY_DN23736_c0_g5	annexin with UniProtKB:Q9XY89 evidence Non-traceable Author Statemen
654	Smp_212780.1	89.33	16.56	2.36291	6.73998	TRINITY_DN21844_c0_g1	Tubulin polymerization-promoting protein (TPPP)%2C putative evidence Inferred from Sequence Alignmen
657	Smp_139330.1	14.01	1.92	2.36188	4.08151	TRINITY_DN17053_c0_g1; TRINITY_DN17053_c0_g2; TRINITY_DN17053_c0_g3; TRINITY_DN18624_c0_g1	nicotinic acetylcholine receptor non alpha with UniProtKB:V9TMX9 evidence Non-traceable Author Statemen
659	Smp_063500.1	17.29	2.56	2.36111	4.38198	TRINITY_DN18778_c0_g1	hypothetical protein evidence Inferred from Electronic Annotation
661	Smp_021550.1	17.84	2.68	2.35602	4.42761	TRINITY_DN16546_c0_g2; TRINITY_DN22170_c0_g2	nucleotide excision repair protein evidence Inferred from Electronic Annotation
662	Smp_125340.2	13.47	1.83	2.35419	4.0268	TRINITY_DN18511_c0_g1	-
664	Smp_147320.1	14.78	2.1	2.34776	4.16027	TRINITY_DN18849_c0_g1; TRINITY_DN18849_c0_g2	camp dependent protein kinase regulatory chain evidence Inferred from Electronic Annotation
666	Smp_243700.1	81.87	15.29	2.34686	6.61706	TRINITY_DN17334_c0_g1; TRINITY_DN2453_c0_g1; TRINITY_DN2453_c0_g2; TRINITY_DN2453_c0_g3; TRINITY_DN50470_c0_g1; TRINITY_DN58491_c0_g1; TRINITY_DN7666_c0_g1	dual specificity evidence Inferred from Electronic Annotation
668	Smp_160940.1	55.02	10.14	2.33019	6.04789	TRINITY_DN16198_c0_g1; TRINITY_DN16198_c0_g3; TRINITY_DN16198_c0_g4; TRINITY_DN21260_c0_g1; TRINITY_DN23666_c0_g14	transcription initiation factor tfiid subunit 5 evidence Inferred from Electronic Annotation
669	Smp_096390.1	47.73	8.7	2.32875	5.84373	TRINITY_DN14224_c0_g1	16 kda calcium binding protein db_xref PMID:1574081 evidence Traceable Author Statemen
671	Smp_144030.1	70.78	13.31	2.32656	6.41092	TRINITY_DN21828_c0_g1	phosphatidate cytidylyltransferase
672	Smp_143130.1	16.44	2.48	2.32524	4.31615	TRINITY_DN15190_c0_g1	four and A half lim domains evidence Inferred from Electronic Annotation
675	Smp_149080.1	17.77	2.76	2.31962	4.42828	TRINITY_DN13607_c0_g1; TRINITY_DN17582_c0_g1	protein FAM160A1 evidence Inferred from Electronic Annotation
676	Smp_126240.1	83.71	15.98	2.3187	6.65378	TRINITY_DN11024_c0_g1; TRINITY_DN17763_c0_g1; TRINITY_DN17763_c0_g2; TRINITY_DN17763_c0_g3; TRINITY_DN17763_c0_g4; TRINITY_DN19050_c0_g1; TRINITY_DN19050_c0_g2; TRINITY_DN19295_c0_g1; TRINITY_DN31549_c0_g1; TRINITY_DN38101_c0_g1; TRINITY_DN40476_c0_g1; TRINITY_DN40996_c0_g1; TRINITY_DN52517_c0_g1; TRINITY_DN57699_c0_g1; TRINITY_DN60014_c0_g1; TRINITY_DN64679_c0_g1	twitchin evidence Inferred from Electronic Annotation
678	Smp_137330.1	36.51	6.54	2.31464	5.46107	TRINITY_DN19604_c0_g1	serine dehydratase evidence Inferred from Electronic Annotation
679	Smp_172420.1	29.68	5.17	2.31396	5.1639	TRINITY_DN13870_c0_g1; TRINITY_DN14570_c0_g1; TRINITY_DN14570_c0_g2; TRINITY_DN26427_c0_g1; TRINITY_DN59076_c0_g1; TRINITY_DN8761_c0_g2	E3 ubiquitin protein ligase TRIP12 evidence Inferred from Electronic Annotation
681	Smp_246310.1	23.21	3.88	2.31065	4.81198	TRINITY_DN18203_c1_g4; TRINITY_DN21213_c6_g1; TRINITY_DN28343_c0_g1; TRINITY_DN56815_c0_g1; TRINITY_DN7148_c0_g1; TRINITY_DN7148_c0_g2	E3 ubiquitin protein ligase UBR3 evidence Inferred from Electronic Annotation
684	Smp_102340.2	22.62	3.77	2.30795	4.77558	TRINITY_DN15603_c0_g2; TRINITY_DN5594_c0_g1; TRINITY_DN5594_c0_g2	adenylate cyclase type IX evidence Inferred from Electronic Annotation
687	Smp_125730.1	43.17	7.97	2.29989	5.70432	TRINITY_DN18062_c1_g1; TRINITY_DN18062_c1_g2; TRINITY_DN20023_c0_g1	hypothetical protein evidence Inferred from Electronic Annotation
691	Smp_171790.1	54.18	10.25	2.29422	6.03188	TRINITY_DN11772_c0_g2; TRINITY_DN12876_c1_g1; TRINITY_DN21207_c0_g1; TRINITY_DN2264_c0_g1; TRINITY_DN2264_c0_g2; TRINITY_DN23882_c0_g4; TRINITY_DN27344_c0_g1; TRINITY_DN27344_c0_g2; TRINITY_DN2857_c0_g1; TRINITY_DN45295_c0_g1; TRINITY_DN54751_c0_g1; TRINITY_DN58222_c0_g1	hypothetical protein evidence Inferred from Electronic Annotation
693	Smp_243850.1	19.51	3.19	2.29131	4.56682	TRINITY_DN18584_c0_g1; TRINITY_DN18584_c0_g2; TRINITY_DN27479_c0_g1	ubiquitin carboxyl terminal hydrolase evidence Inferred from Electronic Annotation
694	Smp_049760.1	14.56	2.18	2.29074	4.14893	TRINITY_DN19769_c0_g1; TRINITY_DN24056_c0_g1; TRINITY_DN70459_c0_g1	TGF-beta receptor%2C TKL group%2C STKR family%2C type1 subfamily db_xref PMID:9556614 evidence Traceable Author Statemen
695	Smp_103790.1	78.21	15.19	2.29058	6.56071	TRINITY_DN13282_c0_g1; TRINITY_DN18746_c0_g1	hypothetical protein evidence Inferred from Electronic Annotation
698	Smp_161080.1	31.54	5.67	2.28646	5.25588	TRINITY_DN19904_c0_g1; TRINITY_DN19904_c0_g2; TRINITY_DN19904_c0_g3; TRINITY_DN19904_c0_g4; TRINITY_DN19904_c0_g5; TRINITY_DN31341_c0_g1; TRINITY_DN35114_c0_g1; TRINITY_DN44248_c0_g1	ran binding protein 9 evidence Inferred from Electronic Annotation
699	Smp_197880.1	19.48	3.2	2.28575	4.5656	TRINITY_DN1117_c0_g1; TRINITY_DN1117_c0_g2; TRINITY_DN17023_c0_g2; TRINITY_DN34456_c0_g1	DNA replication ATP dependent helicase Dna2 evidence Inferred from Electronic Annotation
700	Smp_244250.1	22.01	3.72	2.2854	4.74039	TRINITY_DN23706_c7_g1; TRINITY_DN9127_c0_g1; TRINITY_DN9127_c0_g3; TRINITY_DN9339_c0_g1	-
702	Smp_126920.1	38.17	7.04	2.28448	5.53013	TRINITY_DN21123_c0_g1; TRINITY_DN23303_c4_g7	transmembrane protein 184c evidence Inferred from Electronic Annotation
703	Smp_033010.1	14.48	2.19	2.27878	4.14323	TRINITY_DN15178_c0_g1; TRINITY_DN15178_c0_g2	16 kda calcium binding protein evidence Inferred from Electronic Annotation
706	Smp_157350.1	32.17	5.91	2.26312	5.28836	TRINITY_DN14121_c0_g1; TRINITY_DN20559_c0_g1; TRINITY_DN29613_c0_g1; TRINITY_DN43663_c0_g1; TRINITY_DN9002_c0_g1	serine:threonine protein kinase ULK2 evidence Inferred from Electronic Annotation
708	Smp_007710.1	13.11	1.94	2.26283	4.0045	TRINITY_DN20693_c1_g2; TRINITY_DN23015_c1_g7; TRINITY_DN23895_c5_g1; TRINITY_DN23895_c5_g3; TRINITY_DN23895_c5_g4; TRINITY_DN3575_c0_g1; TRINITY_DN3887_c0_g1	rapamycin insensitive companion of mTOR evidence Inferred from Electronic Annotation
709	Smp_138730.1	17.04	2.77	2.25856	4.37921	TRINITY_DN3444_c0_g1; TRINITY_DN901_c0_g1	alpha fucosyltransferase m alpha fucosyltransferase k alpha fucosyltransferase j alpha fucosyltransferase i evidence Inferred from Electronic Annotation,term Alpha 1%2C6 fucosyltransferase M ,term Alpha 1%2C6 fucosyltransferase J with UniProtKB:G9HW04
710	Smp_146720.1	81.61	16.27	2.25805	6.62761	TRINITY_DN13533_c0_g1; TRINITY_DN13533_c0_g2; TRINITY_DN15102_c0_g2; TRINITY_DN2192_c0_g1; TRINITY_DN22894_c0_g1; TRINITY_DN2315_c0_g1; TRINITY_DN23609_c0_g4; TRINITY_DN27540_c0_g1; TRINITY_DN33526_c0_g1; TRINITY_DN49372_c0_g1; TRINITY_DN58453_c0_g1; TRINITY_DN65359_c0_g1; TRINITY_DN9067_c0_g1; TRINITY_DN9067_c0_g3	tissue type plasminogen activator evidence Inferred from Electronic Annotation
711	Smp_246160.1	18.27	3.03	2.2575	4.47897	TRINITY_DN19529_c0_g5; TRINITY_DN23525_c0_g2; TRINITY_DN50685_c0_g1	Ankyrin repeat domain-containing evidence Inferred from Electronic Annotation
712	Smp_149930.1	29.62	5.41	2.25608	5.17113	TRINITY_DN19724_c11_g2; TRINITY_DN41192_c0_g1; TRINITY_DN46812_c0_g1; TRINITY_DN71480_c0_g1; TRINITY_DN8883_c0_g1; TRINITY_DN8883_c0_g2	sodium:potassium:calcium exchanger 6 evidence Inferred from Electronic Annotation
715	Smp_201060.1	2584.32	542.99	2.24869	11.6112	TRINITY_DN18583_c0_g1; TRINITY_DN18583_c0_g2; TRINITY_DN18583_c0_g5; TRINITY_DN36191_c0_g1; TRINITY_DN36191_c0_g2; TRINITY_DN42087_c0_g1	dynein light chain with UniProtKB:Q94748 evidence Non-traceable Author Statemen
716	Smp_167860.1	28.89	5.29	2.24853	5.13668	TRINITY_DN18666_c0_g1; TRINITY_DN23882_c0_g12	nipped b protein evidence Inferred from Electronic Annotation
718	Smp_196300.1	20.78	3.59	2.24644	4.66505	TRINITY_DN18586_c0_g1; TRINITY_DN48018_c0_g1	FERM%2C RhoGEF and pleckstrin domain containing protein evidence Inferred from Electronic Annotation
721	Smp_144310.1	32.95	6.2	2.23734	5.32733	TRINITY_DN15076_c0_g1; TRINITY_DN22250_c5_g1; TRINITY_DN27857_c0_g1	potassium voltage gated channel subfamily KQT evidence Inferred from Electronic Annotation
724	Smp_243680.1	16.46	2.72	2.23068	4.33485	TRINITY_DN22301_c0_g1	ATP dependent Clp Protease ATP binding subunit evidence Inferred from Electronic Annotation
727	Smp_172700.1	23.55	4.24	2.22808	4.8475	TRINITY_DN1660_c0_g1	cyclin dependent kinase 6 evidence Inferred from Electronic Annotation
729	Smp_128310.1	23.62	4.27	2.22396	4.8525	TRINITY_DN18682_c0_g1	xylosyltransferase I evidence Inferred from Electronic Annotation
730	Smp_208030.1	36.89	7.12	2.22227	5.49217	TRINITY_DN10622_c0_g1; TRINITY_DN10622_c0_g2; TRINITY_DN16836_c0_g2; TRINITY_DN21183_c5_g1; TRINITY_DN52056_c0_g1; TRINITY_DN58332_c0_g1; TRINITY_DN620_c0_g2	hypothetical protein evidence Inferred from Electronic Annotation
732	Smp_162080.1	37.19	7.2	2.2195	5.5043	TRINITY_DN15801_c0_g1; TRINITY_DN28081_c0_g1	MLX interacting protein evidence Inferred from Electronic Annotation
734	Smp_175760.1	36.72	7.14	2.21223	5.48736	TRINITY_DN16368_c0_g1; TRINITY_DN19344_c0_g1; TRINITY_DN26244_c0_g1; TRINITY_DN37183_c0_g1; TRINITY_DN52856_c0_g1; TRINITY_DN9673_c0_g1; TRINITY_DN9673_c0_g2	dnaj subfamily c evidence Inferred from Electronic Annotation
737	Smp_127720.1	23.56	4.31	2.20953	4.8515	TRINITY_DN12745_c0_g1	biogenic amine (dopamine) receptor evidence Inferred from Electronic Annotation
738	Smp_125270.1	22.03	3.98	2.2093	4.75542	TRINITY_DN13747_c0_g1; TRINITY_DN7965_c0_g1	dual specificity evidence Inferred from Electronic Annotation
744	Smp_124100.1	33.03	6.45	2.19149	5.33914	TRINITY_DN21543_c0_g2; TRINITY_DN27017_c0_g1; TRINITY_DN35834_c0_g1	Splicing factor%2C arginine:serine rich 16 evidence Inferred from Electronic Annotation
750	Smp_055720.1	15.05	2.57	2.16858	4.21878	TRINITY_DN22564_c0_g2; TRINITY_DN25590_c0_g1; TRINITY_DN34748_c0_g1	MORC family CW type zinc finger protein 2 evidence Inferred from Electronic Annotation
752	Smp_087010.1	39.52	8.05	2.16264	5.60199	TRINITY_DN13943_c0_g1; TRINITY_DN21694_c0_g1; TRINITY_DN21694_c0_g2; TRINITY_DN21694_c0_g3; TRINITY_DN51260_c0_g1	DNA polymerase delta catalytic subunit evidence Inferred from Electronic Annotation
753	Smp_134550.1	40.18	8.2	2.16224	5.62585	TRINITY_DN20868_c0_g2	hypothetical protein evidence Inferred from Electronic Annotation
755	Smp_011560.1	56.09	11.77	2.16048	6.10559	TRINITY_DN16730_c0_g1	tetraspanin CD63 receptor evidence Inferred from Electronic Annotation
756	Smp_124030.1	48.63	10.12	2.15806	5.90087	TRINITY_DN23640_c0_g1; TRINITY_DN23640_c0_g7	hypothetical protein evidence Inferred from Electronic Annotation
757	Smp_242870.1	57.51	12.11	2.15802	6.142	TRINITY_DN14149_c0_g1; TRINITY_DN15586_c0_g1; TRINITY_DN18146_c0_g1; TRINITY_DN19598_c0_g1; TRINITY_DN22188_c0_g1; TRINITY_DN25942_c0_g1; TRINITY_DN71529_c0_g1; TRINITY_DN9315_c0_g1	microtubule actin cross linking factor 1 evidence Inferred from Electronic Annotation
758	Smp_198380.1	130.12	28.4	2.157	7.31759	TRINITY_DN18854_c0_g1; TRINITY_DN18854_c0_g2; TRINITY_DN18854_c0_g3; TRINITY_DN21422_c6_g1; TRINITY_DN23896_c5_g18; TRINITY_DN23896_c5_g25; TRINITY_DN23896_c5_g3; TRINITY_DN60542_c0_g1; TRINITY_DN8451_c0_g1; TRINITY_DN8451_c0_g3; TRINITY_DN9076_c0_g1; TRINITY_DN9076_c0_g2	Argonaute
768	Smp_155610.1	13.05	2.18	2.14347	4.02059	TRINITY_DN20894_c0_g2	fast skeletal troponin beta fast skeletal troponin alpha evidence Inferred from Electronic Annotation
770	Smp_074450.1	632.49	142.73	2.13996	9.60032	TRINITY_DN18796_c0_g2	hypothetical protein evidence Inferred from Electronic Annotation
772	Smp_244200.1	69.46	15.01	2.13783	6.41735	TRINITY_DN20496_c0_g3; TRINITY_DN23896_c5_g17; TRINITY_DN23896_c5_g31; TRINITY_DN23896_c5_g36; TRINITY_DN23896_c5_g8; TRINITY_DN4155_c0_g1; TRINITY_DN4155_c0_g2	ATPase family AAA domain containing protein 1 evidence Inferred from Electronic Annotation
774	Smp_245850.1	19.65	3.7	2.13541	4.60585	TRINITY_DN11474_c0_g1; TRINITY_DN11474_c0_g2; TRINITY_DN38082_c0_g1; TRINITY_DN66245_c0_g1; TRINITY_DN68576_c0_g1	biogenic amine (5HT) receptor db_xref PMID:24884876 evidence Traceable Author Statement,term serotonin receptor db_xref PMID:24884876 evidence Traceable Author Statemen
775	Smp_155030.1	19.95	3.77	2.13489	4.62761	TRINITY_DN23882_c1_g1; TRINITY_DN23885_c3_g18; TRINITY_DN23885_c3_g21; TRINITY_DN33282_c0_g1; TRINITY_DN8440_c0_g3	lisH domain and HEAT repeat containing protein evidence Inferred from Electronic Annotation
776	Smp_047900.1	37.56	7.78	2.13481	5.53419	TRINITY_DN11551_c0_g1; TRINITY_DN14404_c0_g1; TRINITY_DN43449_c0_g1	Serine/Threonine Kinase%2C CMGC Group%2C MAPK family%2C ERK subfamily
778	Smp_166840.1	54.12	11.58	2.13144	6.05961	TRINITY_DN16257_c0_g1; TRINITY_DN17823_c0_g1; TRINITY_DN23886_c7_g1; TRINITY_DN3635_c0_g1; TRINITY_DN43150_c0_g1; TRINITY_DN43210_c0_g1; TRINITY_DN47122_c0_g1; TRINITY_DN59492_c0_g1; TRINITY_DN64983_c0_g1; TRINITY_DN68197_c0_g1	transcription initiation factor TFIID subunit 1 evidence Inferred from Electronic Annotation
783	Smp_211340.1	66.2	14.44	2.12179	6.3512	TRINITY_DN17968_c0_g1; TRINITY_DN17968_c0_g3; TRINITY_DN17968_c0_g4; TRINITY_DN19507_c1_g5; TRINITY_DN209_c1_g1; TRINITY_DN21213_c6_g10; TRINITY_DN21213_c6_g13; TRINITY_DN21213_c6_g3; TRINITY_DN21213_c6_g4	e3 ubiquitin protein ligase RFWD3 evidence Inferred from Electronic Annotation
788	Smp_146830.1	30.52	6.28	2.11426	5.24031	TRINITY_DN17066_c0_g1	solute carrier family 16 protein evidence Inferred from Electronic Annotation
791	Smp_004190.1	104.54	23.44	2.11047	7.011	TRINITY_DN21100_c0_g2; TRINITY_DN21100_c0_g3; TRINITY_DN21100_c0_g4; TRINITY_DN21100_c0_g5	cationic amino acid transporter 4 evidence Inferred from Electronic Annotation
792	Smp_024000.1	91.33	20.39	2.10986	6.8166	TRINITY_DN12236_c1_g1; TRINITY_DN13330_c0_g1; TRINITY_DN16699_c1_g1; TRINITY_DN19647_c0_g3; TRINITY_DN19647_c0_g5; TRINITY_DN19647_c0_g6; TRINITY_DN19647_c0_g7; TRINITY_DN21070_c1_g12; TRINITY_DN21070_c1_g4; TRINITY_DN23458_c0_g1; TRINITY_DN23887_c11_g14; TRINITY_DN23909_c19_g6; TRINITY_DN23909_c19_g8; TRINITY_DN41576_c0_g1; TRINITY_DN7001_c0_g1; TRINITY_DN7206_c0_g1; TRINITY_DN8232_c0_g1; TRINIT…	vacuolar protein sorting associated protein 33B evidence Inferred from Electronic Annotation
794	Smp_030300.4	20.69	4.03	2.1084	4.68482	TRINITY_DN14052_c0_g2; TRINITY_DN14052_c0_g3; TRINITY_DN22094_c0_g2	-
797	Smp_050220.1	13.74	2.43	2.10346	4.10182	TRINITY_DN23474_c0_g3	complexin evidence Inferred from Electronic Annotation
799	Smp_016090.1	38.93	8.31	2.10062	5.59216	TRINITY_DN18292_c0_g2; TRINITY_DN23896_c5_g11; TRINITY_DN23896_c5_g21; TRINITY_DN23896_c5_g22; TRINITY_DN23896_c5_g27; TRINITY_DN23896_c5_g4; TRINITY_DN24430_c0_g1; TRINITY_DN70842_c0_g1	F box protein 38 evidence Inferred from Electronic Annotation
801	Smp_143680.1	64.15	14.22	2.0978	6.31052	TRINITY_DN11480_c0_g1; TRINITY_DN20151_c0_g1; TRINITY_DN23524_c3_g1; TRINITY_DN23524_c3_g2; TRINITY_DN23524_c3_g3; TRINITY_DN23524_c3_g6; TRINITY_DN31779_c0_g1; TRINITY_DN42387_c0_g1; TRINITY_DN53050_c0_g1; TRINITY_DN5590_c0_g2; TRINITY_DN9515_c0_g1	laminin subunit evidence Inferred from Electronic Annotation
804	Smp_088920.1	392.78	91.24	2.09393	8.9219	TRINITY_DN18002_c0_g1; TRINITY_DN18002_c0_g4; TRINITY_DN18002_c0_g5; TRINITY_DN1890_c0_g1; TRINITY_DN1890_c0_g3; TRINITY_DN22432_c0_g2; TRINITY_DN36747_c0_g1	serine:threonine protein kinase evidence Inferred from Electronic Annotation
807	Smp_153410.1	34.8	7.41	2.08978	5.43329	TRINITY_DN21153_c0_g1; TRINITY_DN21153_c0_g4	Serine:threonine protein phosphatase 2A 65 kDa evidence Inferred from Electronic Annotation
809	Smp_076400.1	41.7	9.08	2.08274	5.69432	TRINITY_DN15969_c0_g1	universal stress protein evidence Inferred from Electronic Annotation
810	Smp_027000.1	42.78	9.34	2.08204	5.73118	TRINITY_DN23153_c1_g1; TRINITY_DN23153_c2_g2	abhydrolase domain containing protein FAM108C1 evidence Inferred from Electronic Annotation
811	Smp_207020.1	27.63	5.77	2.0803	5.10434	TRINITY_DN10152_c0_g2; TRINITY_DN14400_c0_g1; TRINITY_DN14400_c0_g2; TRINITY_DN18761_c0_g1; TRINITY_DN18761_c0_g2; TRINITY_DN23833_c2_g2	E3 ubiquitin protein ligase NEDD4 evidence Inferred from Electronic Annotation
813	Smp_246290.1	18.26	3.56	2.0785	4.51223	TRINITY_DN15736_c0_g1; TRINITY_DN39094_c0_g1; TRINITY_DN39537_c0_g1; TRINITY_DN56518_c0_g1	phosphatidylinositide phosphatase SAC2 evidence Inferred from Electronic Annotation
814	Smp_123710.1	14.27	2.62	2.07664	4.16108	TRINITY_DN10885_c0_g1; TRINITY_DN2419_c0_g1; TRINITY_DN2419_c0_g2; TRINITY_DN4525_c0_g1; TRINITY_DN70267_c0_g1	acetyl-CoA carboxylase
817	Smp_141380.1	46.1	10.2	2.07223	5.84046	TRINITY_DN23389_c0_g1; TRINITY_DN23909_c19_g9; TRINITY_DN35665_c0_g1; TRINITY_DN70027_c0_g1	serine:threonine protein kinase VRK1 evidence Inferred from Electronic Annotation
820	Smp_156000.1	29.22	6.23	2.06344	5.18785	TRINITY_DN20169_c3_g17; TRINITY_DN20169_c3_g3; TRINITY_DN22583_c13_g1; TRINITY_DN22695_c0_g1; TRINITY_DN54759_c0_g1	oxysterol binding protein 9 evidence Inferred from Electronic Annotation
822	Smp_075420.1	27.35	5.8	2.05974	5.09381	TRINITY_DN22056_c3_g2	hypothetical protein evidence Inferred from Electronic Annotation
823	Smp_130340.1	15.43	2.95	2.05641	4.2765	TRINITY_DN13680_c1_g2; TRINITY_DN20137_c3_g4; TRINITY_DN27468_c0_g1; TRINITY_DN9077_c0_g1	phosphatidylinositol 4 kinase beta evidence Inferred from Electronic Annotation
826	Smp_130180.1	16.06	3.13	2.0464	4.33557	TRINITY_DN19486_c0_g3; TRINITY_DN19486_c1_g2; TRINITY_DN26717_c0_g1; TRINITY_DN66396_c0_g1	protein vprbp evidence Inferred from Electronic Annotation
831	Smp_159540.1	30.36	6.62	2.04106	5.24717	TRINITY_DN20308_c1_g10; TRINITY_DN21701_c0_g1; TRINITY_DN22748_c0_g2; TRINITY_DN24713_c0_g1; TRINITY_DN48415_c0_g1; TRINITY_DN49265_c0_g1; TRINITY_DN51174_c0_g1	baculoviral IAP repeat containing protein 6 evidence Inferred from Electronic Annotation
832	Smp_147810.1	29.63	6.45	2.03963	5.21257	TRINITY_DN19914_c0_g1; TRINITY_DN27991_c0_g1	deoxyribonuclease TATDN3 evidence Inferred from Electronic Annotation
839	Smp_068280.1	47.48	10.84	2.03372	5.89045	TRINITY_DN19323_c0_g1; TRINITY_DN19323_c0_g2	prolyl 4 hydroxylase subunit alpha 2 evidence Inferred from Electronic Annotation
840	Smp_159350.1	28.4	6.22	2.02575	5.15462	TRINITY_DN11096_c0_g1; TRINITY_DN11096_c0_g2; TRINITY_DN16007_c0_g1; TRINITY_DN19357_c0_g3; TRINITY_DN19357_c0_g4; TRINITY_DN8612_c0_g1	protein split ends evidence Inferred from Electronic Annotation
843	Smp_129610.1	20.97	4.41	2.02183	4.72137	TRINITY_DN16130_c0_g1; TRINITY_DN21070_c1_g10; TRINITY_DN22750_c1_g1; TRINITY_DN23887_c12_g1; TRINITY_DN23909_c19_g11; TRINITY_DN23909_c19_g7; TRINITY_DN34627_c0_g1	malate dehydrogenase evidence Inferred from Electronic Annotation
844	Smp_146950.1	50.81	11.76	2.0216	5.99027	TRINITY_DN11714_c0_g1; TRINITY_DN15733_c0_g1; TRINITY_DN15733_c0_g2; TRINITY_DN16034_c0_g1; TRINITY_DN16836_c0_g1; TRINITY_DN17797_c0_g1; TRINITY_DN8674_c0_g1	basement membrane specific heparan sulfate evidence Inferred from Electronic Annotation
847	Smp_149870.1	13.04	2.46	2.0207	4.04439	TRINITY_DN17974_c0_g3; TRINITY_DN22956_c5_g16; TRINITY_DN22956_c5_g18; TRINITY_DN32376_c0_g1	cat eye syndrome critical region protein cat eye syndrome candidate region protein evidence Inferred from Electronic Annotation
849	Smp_157980.1	20.57	4.33	2.01682	4.69488	TRINITY_DN14069_c0_g1; TRINITY_DN21512_c0_g3; TRINITY_DN72312_c0_g1	hypothetical protein evidence Inferred from Electronic Annotation
850	Smp_130890.1	31.11	6.94	2.01581	5.28725	TRINITY_DN10118_c0_g1; TRINITY_DN10118_c0_g2; TRINITY_DN18678_c0_g1; TRINITY_DN18678_c0_g2; TRINITY_DN2516_c0_g1	transient receptor potential cation channel evidence Inferred from Electronic Annotation
852	Smp_142420.1	13.07	2.5	2.0072	4.0505	TRINITY_DN21809_c0_g2	tetraspanin family protein with InterPro:IPR018499 evidence Inferred from Sequence Model
853	Smp_095620.2	20.31	4.32	2.00203	4.67976	TRINITY_DN22500_c0_g2; TRINITY_DN22828_c1_g9	hypothetical protein evidence Inferred from Electronic Annotation
855	Smp_247940.1	32.76	7.45	1.99829	5.36492	TRINITY_DN10940_c0_g1; TRINITY_DN25221_c0_g1; TRINITY_DN48492_c0_g1; TRINITY_DN80_c0_g1; TRINITY_DN80_c0_g2; TRINITY_DN80_c0_g3	Large neutral amino acids transporter small evidence Inferred from Electronic Annotation
861	Smp_026700.1	27.08	6.09	1.98569	5.09466	TRINITY_DN13547_c0_g1; TRINITY_DN14852_c0_g1; TRINITY_DN14852_c0_g2; TRINITY_DN14852_c0_g3; TRINITY_DN1667_c0_g1; TRINITY_DN23909_c19_g10; TRINITY_DN23909_c19_g13; TRINITY_DN9257_c0_g1	tRNA dihydrouridine synthase 4 evidence Inferred from Electronic Annotation
867	Smp_001095.1	23.74	5.28	1.97801	4.90785	TRINITY_DN12700_c0_g1; TRINITY_DN21976_c0_g1	tudor domain containing protein 3 evidence Inferred from Electronic Annotation
868	Smp_140120.1	29.43	6.73	1.97695	5.21568	TRINITY_DN17377_c0_g1; TRINITY_DN17377_c0_g2; TRINITY_DN20842_c0_g1; TRINITY_DN20842_c0_g2; TRINITY_DN20842_c0_g3	hypothetical protein evidence Inferred from Electronic Annotation
872	Smp_170300.1	53.57	12.91	1.97199	6.07639	TRINITY_DN21968_c0_g1; TRINITY_DN21968_c0_g3; TRINITY_DN21968_c0_g4	dehydrogenase:reductase SDR family member evidence Inferred from Electronic Annotation
873	Smp_145250.1	56.8	13.74	1.97133	6.16068	TRINITY_DN19579_c0_g1; TRINITY_DN54480_c0_g1	hypothetical protein evidence Inferred from Electronic Annotation
876	Smp_055780.1	38.95	9.22	1.9668	5.61971	TRINITY_DN18205_c0_g1; TRINITY_DN433_c0_g2; TRINITY_DN7240_c0_g1	smdr2 db_xref PMID:7969275 evidence Traceable Author Statemen
877	Smp_061680.1	18	3.87	1.96401	4.51538	TRINITY_DN13743_c0_g1; TRINITY_DN51544_c0_g1	RUN and SH3 domain containing protein 1 evidence Inferred from Electronic Annotation
881	Smp_176930.1	25.46	5.79	1.96233	5.01123	TRINITY_DN14993_c0_g2; TRINITY_DN23510_c5_g1	cationic amino acid transporter evidence Inferred from Electronic Annotation
883	Smp_143690.2	25.1	5.72	1.95752	4.99186	TRINITY_DN10116_c0_g1; TRINITY_DN23271_c0_g5	-
884	Smp_157770.1	17.22	3.7	1.95479	4.45418	TRINITY_DN14657_c0_g1; TRINITY_DN24882_c0_g1; TRINITY_DN6441_c0_g1	protein zyg 11 protein B evidence Inferred from Electronic Annotation
887	Smp_138030.1	36.12	8.61	1.94959	5.51507	TRINITY_DN23166_c0_g1; TRINITY_DN24532_c0_g1; TRINITY_DN46804_c0_g1; TRINITY_DN56843_c0_g1	histone lysine evidence Inferred from Electronic Annotation
888	Smp_142860.1	15.71	3.33	1.94827	4.32481	TRINITY_DN23831_c0_g10	alpha 1%2C3 fucosyltransferase F with UniProtKB:E2EAI9 evidence Non-traceable Author Statemen
889	Smp_242950.1	16.96	3.67	1.94329	4.43496	TRINITY_DN20946_c0_g1; TRINITY_DN27698_c0_g1; TRINITY_DN29556_c0_g1	DNA polymerase zeta catalytic subunit evidence Inferred from Electronic Annotation
894	Smp_131020.1	18.68	4.14	1.93689	4.5741	TRINITY_DN22670_c0_g2	transmembrane and TPR repeat containing protein evidence Inferred from Electronic Annotation
896	Smp_051510.1	14.69	3.1	1.93615	4.23189	TRINITY_DN5775_c0_g1; TRINITY_DN66890_c0_g1; TRINITY_DN8805_c0_g2	pericentrin fragment evidence Inferred from Electronic Annotation
897	Smp_169900.1	15.18	3.23	1.93548	4.27873	TRINITY_DN15316_c0_g1; TRINITY_DN15316_c0_g2; TRINITY_DN18137_c0_g1	serine:threonine protein kinase evidence Inferred from Electronic Annotation
899	Smp_129950.1	72.65	18.28	1.93358	6.52246	TRINITY_DN17265_c0_g1; TRINITY_DN21256_c0_g2; TRINITY_DN23217_c1_g1; TRINITY_DN23217_c1_g2	RNA binding protein 12 evidence Inferred from Electronic Annotation
904	Smp_142600.1	13.09	2.71	1.92518	4.07039	TRINITY_DN22679_c2_g7; TRINITY_DN49377_c0_g1; TRINITY_DN8501_c0_g1	capicua protein evidence Inferred from Electronic Annotation
905	Smp_130750.1	16.8	3.7	1.92114	4.42626	TRINITY_DN13993_c0_g6; TRINITY_DN23303_c4_g4; TRINITY_DN23303_c4_g9; TRINITY_DN32976_c0_g1; TRINITY_DN39945_c0_g1; TRINITY_DN61303_c0_g1; TRINITY_DN67984_c0_g1	enhancer of mRNA decapping protein 4 evidence Inferred from Electronic Annotation
907	Smp_242760.1	17.49	3.9	1.91589	4.48478	TRINITY_DN20296_c0_g1	hypothetical protein evidence Inferred from Electronic Annotation
913	Smp_168560.1	117.17	30.51	1.90698	7.21607	TRINITY_DN19875_c0_g1	steroid dehydrogenase evidence Inferred from Electronic Annotation
917	Smp_143910.1	13.76	2.95	1.90177	4.14649	TRINITY_DN1931_c0_g1; TRINITY_DN44945_c0_g1; TRINITY_DN67508_c0_g1; TRINITY_DN71959_c0_g1; TRINITY_DN9959_c0_g1; TRINITY_DN9959_c0_g3	coiled coil and C2 domain containing protein 2A evidence Inferred from Electronic Annotation
918	Smp_244190.1	113.64	29.73	1.89939	7.17363	TRINITY_DN4208_c0_g1	-
920	Smp_083040.2	20.46	4.77	1.89501	4.71315	TRINITY_DN21879_c0_g1	nervous system adducin evidence Inferred from Electronic Annotation
922	Smp_144560.1	25.41	6.13	1.88911	5.02414	TRINITY_DN11290_c1_g1; TRINITY_DN23907_c8_g13	Nucleobindin 2 evidence Inferred from Electronic Annotation
924	Smp_081260.1	15.82	3.55	1.88624	4.34837	TRINITY_DN172_c0_g1; TRINITY_DN172_c0_g2; TRINITY_DN20727_c0_g1	type I inositol 3%2C4 bisphosphate 4 phosphatase evidence Inferred from Electronic Annotation
926	Smp_172400.1	34.19	8.53	1.88462	5.45022	TRINITY_DN15030_c0_g1; TRINITY_DN17273_c0_g1; TRINITY_DN23905_c12_g1; TRINITY_DN53101_c0_g1; TRINITY_DN5440_c0_g1; TRINITY_DN5440_c0_g2	phosphatidylinositol 4 phosphate 3 kinase C2 evidence Inferred from Electronic Annotation
927	Smp_138100.1	29.12	7.16	1.88408	5.22033	TRINITY_DN22637_c0_g1	hypothetical protein evidence Inferred from Electronic Annotation
929	Smp_213860.1	48.91	12.56	1.87997	5.96509	TRINITY_DN19476_c0_g1; TRINITY_DN22231_c4_g1; TRINITY_DN4551_c0_g1	coiled coil domain containing protein 103 evidence Inferred from Electronic Annotation
931	Smp_035040.1	20.34	4.8	1.87944	4.70819	TRINITY_DN12931_c0_g2; TRINITY_DN23610_c2_g2; TRINITY_DN614_c0_g1	hypothetical protein evidence Inferred from Electronic Annotation
932	Smp_161250.1	13.35	2.91	1.87581	4.10936	TRINITY_DN21956_c1_g8; TRINITY_DN21970_c0_g1	microphthalmia associated transcription factor evidence Inferred from Electronic Annotation
933	Smp_163570.1	83.95	22.15	1.8756	6.74281	TRINITY_DN12033_c0_g1; TRINITY_DN12033_c0_g3; TRINITY_DN12392_c0_g1; TRINITY_DN12392_c0_g2; TRINITY_DN17014_c0_g2; TRINITY_DN17014_c0_g3; TRINITY_DN19088_c1_g1; TRINITY_DN21296_c0_g1; TRINITY_DN25684_c0_g1; TRINITY_DN41008_c0_g1; TRINITY_DN41117_c0_g2; TRINITY_DN4523_c0_g1; TRINITY_DN63621_c0_g1; TRINITY_DN701_c0_g1; TRINITY_DN701_c0_g2	Ryanodine receptor evidence Inferred from Electronic Annotation
934	Smp_028200.1	27.11	6.68	1.87191	5.1206	TRINITY_DN15540_c0_g1; TRINITY_DN19607_c0_g2; TRINITY_DN63456_c0_g1	Troponin I (TnI) evidence Inferred from Electronic Annotation
936	Smp_061970.1	18.49	4.34	1.86782	4.57471	TRINITY_DN15742_c0_g1; TRINITY_DN17740_c1_g1	GPI ethanolamine phosphate transferase 2 evidence Inferred from Electronic Annotation
938	Smp_175390.1	14.37	3.22	1.8648	4.21645	TRINITY_DN1695_c0_g1; TRINITY_DN42520_c1_g1; TRINITY_DN9244_c0_g1	hypothetical protein evidence Inferred from Electronic Annotation
941	Smp_141360.1	38.56	9.88	1.86236	5.62761	TRINITY_DN11062_c1_g1; TRINITY_DN15836_c0_g1; TRINITY_DN21517_c0_g1; TRINITY_DN29826_c0_g2	pyruvate carboxylase%2C mitochondrial evidence Inferred from Electronic Annotation
947	Smp_194280.1	38.93	10.04	1.85473	5.64299	TRINITY_DN17745_c0_g3	hypothetical protein evidence Inferred from Electronic Annotation
948	Smp_210650.1	113.29	30.7	1.85014	7.17981	TRINITY_DN13457_c0_g1; TRINITY_DN13457_c0_g2; TRINITY_DN13457_c0_g3; TRINITY_DN13457_c0_g4; TRINITY_DN16477_c0_g1; TRINITY_DN16477_c0_g2; TRINITY_DN23666_c0_g8	histone lysine N methyltransferase SETD2 evidence Inferred from Electronic Annotation
951	Smp_170450.1	94.49	25.62	1.84284	6.92017	TRINITY_DN22183_c0_g2; TRINITY_DN23882_c0_g1	sodium:potassium:calcium exchanger evidence Inferred from Electronic Annotation
953	Smp_212280.1	13.13	2.94	1.84249	4.09339	TRINITY_DN10448_c0_g2; TRINITY_DN21815_c0_g1; TRINITY_DN23896_c5_g23	dynein heavy chain evidence Inferred from Electronic Annotation
954	Smp_244660.1	19.53	4.73	1.84113	4.65878	TRINITY_DN19587_c0_g1; TRINITY_DN23885_c3_g10; TRINITY_DN7146_c0_g1	Tonsoku-like protein evidence Inferred from Electronic Annotation
956	Smp_035390.1	68.36	18.38	1.83954	6.45516	TRINITY_DN21423_c0_g2	protein tyrosine phosphatase%2C non receptor type evidence Inferred from Electronic Annotation
957	Smp_173580.1	35.99	9.34	1.8389	5.53387	TRINITY_DN12015_c0_g2; TRINITY_DN16640_c0_g1; TRINITY_DN23902_c14_g22; TRINITY_DN23902_c14_g29; TRINITY_DN23902_c14_g7; TRINITY_DN23902_c14_g8	-
958	Smp_075350.1	13.48	3.05	1.83807	4.13175	TRINITY_DN22128_c0_g1	hypothetical protein evidence Inferred from Electronic Annotation
962	Smp_158830.1	95.23	26.05	1.83086	6.93404	TRINITY_DN12015_c0_g1; TRINITY_DN18024_c0_g2; TRINITY_DN18152_c1_g2; TRINITY_DN23084_c1_g18; TRINITY_DN23302_c1_g1; TRINITY_DN33945_c0_g1; TRINITY_DN3610_c0_g1; TRINITY_DN3610_c0_g2	transmembrane protein 1:tmem1b evidence Inferred from Electronic Annotation
963	Smp_199210.1	193.23	53.61	1.83053	7.95327	TRINITY_DN17361_c0_g1; TRINITY_DN21213_c12_g1; TRINITY_DN22180_c0_g1; TRINITY_DN22180_c1_g1; TRINITY_DN23233_c4_g16; TRINITY_DN26474_c0_g1	plasma membrane calcium transporting ATPase evidence Inferred from Electronic Annotation
966	Smp_242710.1	23.61	5.94	1.82624	4.9331	TRINITY_DN1146_c0_g1; TRINITY_DN22691_c0_g4; TRINITY_DN69178_c0_g1	hypothetical protein evidence Inferred from Electronic Annotation
968	Smp_144790.1	38.39	10.14	1.82208	5.63023	TRINITY_DN17257_c0_g1	calmodulin evidence Inferred from Electronic Annotation
970	Smp_169290.1	12.84	2.92	1.81992	4.06695	TRINITY_DN17414_c0_g3; TRINITY_DN28777_c0_g1	hypothetical protein evidence Inferred from Electronic Annotation
971	Smp_039740.1	26.11	6.69	1.81777	5.07895	TRINITY_DN20169_c3_g6; TRINITY_DN23765_c2_g1; TRINITY_DN23765_c2_g16; TRINITY_DN23765_c2_g3; TRINITY_DN31942_c0_g1; TRINITY_DN32305_c0_g1; TRINITY_DN61957_c0_g1; TRINITY_DN68492_c0_g1	PERQ amino acid rich with GYF domain containing protein evidence Inferred from Electronic Annotation
972	Smp_176610.1	24.64	6.29	1.81441	4.99684	TRINITY_DN17474_c0_g1; TRINITY_DN23287_c0_g4; TRINITY_DN4186_c0_g1; TRINITY_DN55486_c0_g1	BTB:POZ domain containing protein evidence Inferred from Electronic Annotation
973	Smp_171610.1	15.46	3.68	1.81438	4.33199	TRINITY_DN12348_c0_g1; TRINITY_DN17453_c0_g1	dual specificity serine:threonine tyrosine evidence Inferred from Electronic Annotation
974	Smp_094190.1	22.1	5.57	1.81393	4.84147	TRINITY_DN17880_c0_g1; TRINITY_DN19469_c0_g1; TRINITY_DN8360_c0_g1	serine:threonine protein kinase NIM1 evidence Inferred from Electronic Annotation
975	Smp_001040.1	168.51	47.27	1.81217	7.76009	TRINITY_DN23857_c0_g1	kinesin heavy chain evidence Inferred from Electronic Annotation
976	Smp_170170.1	17.4	4.24	1.81207	4.5008	TRINITY_DN16014_c0_g1; TRINITY_DN16014_c1_g1; TRINITY_DN48526_c0_g1	WD repeat containing protein 47 evidence Inferred from Electronic Annotation
978	Smp_128440.1	38.94	10.41	1.80754	5.65392	TRINITY_DN23787_c2_g8	run and fyve domain containing protein evidence Inferred from Electronic Annotation
979	Smp_085830.1	14.76	3.51	1.80507	4.26828	TRINITY_DN23909_c18_g1	hypothetical protein evidence Inferred from Electronic Annotation
984	Smp_163750.1	31.77	8.47	1.79094	5.36597	TRINITY_DN10312_c0_g1; TRINITY_DN2287_c0_g1; TRINITY_DN2547_c0_g1; TRINITY_DN2547_c0_g2; TRINITY_DN45359_c0_g1; TRINITY_DN5466_c0_g1; TRINITY_DN5466_c0_g2; TRINITY_DN5466_c0_g3; TRINITY_DN6251_c0_g1; TRINITY_DN6251_c0_g2; TRINITY_DN68091_c0_g1; TRINITY_DN68091_c0_g2	otoferlin evidence Inferred from Electronic Annotation
985	Smp_089460.1	13.08	3.08	1.78701	4.10098	TRINITY_DN23832_c0_g12; TRINITY_DN23832_c0_g3; TRINITY_DN23832_c0_g5	calpain A evidence Inferred from Electronic Annotation
989	Smp_145090.1	130	37.31	1.77377	7.39498	TRINITY_DN10496_c0_g1; TRINITY_DN21857_c0_g1; TRINITY_DN23908_c6_g11; TRINITY_DN23908_c6_g9	serine incorporator 5 evidence Inferred from Electronic Annotation
993	Smp_212790.1	66.35	18.81	1.76545	6.42895	TRINITY_DN11794_c2_g1; TRINITY_DN12089_c0_g1; TRINITY_DN21342_c4_g1; TRINITY_DN21342_c4_g2; TRINITY_DN21442_c0_g1; TRINITY_DN21442_c0_g2; TRINITY_DN21442_c0_g3; TRINITY_DN21909_c6_g2	histone deacetylase%2C putative evidence Inferred from Electronic Annotation
994	Smp_247180.1	79.98	22.86	1.76297	6.69822	TRINITY_DN22446_c0_g1	putative heat shock protein
997	Smp_008900.1	25.79	6.94	1.75448	5.07596	TRINITY_DN2317_c0_g2; TRINITY_DN23625_c0_g6; TRINITY_DN41944_c0_g1	eukaryotic translation evidence Inferred from Electronic Annotation
998	Smp_104670.1	69.54	19.98	1.74943	6.50016	TRINITY_DN22653_c0_g2	Ras protein Rab 8A evidence Inferred from Electronic Annotation
1000	Smp_143620.1	17.32	4.46	1.74645	4.5097	TRINITY_DN15513_c0_g1; TRINITY_DN16219_c0_g1; TRINITY_DN16219_c0_g2; TRINITY_DN8078_c0_g1; TRINITY_DN8078_c0_g2; TRINITY_DN8078_c0_g3	muscle specific protein h muscle specific protein d muscle specific protein b evidence Inferred from Electronic Annotation
1003	Smp_247200.1	20.14	5.31	1.74426	4.7252	TRINITY_DN22956_c1_g1	-
1005	Smp_061590.1	60.12	17.25	1.74375	6.29223	TRINITY_DN13643_c0_g3; TRINITY_DN21955_c0_g1	regulator of nonsense transcripts 1 evidence Inferred from Electronic Annotation
1006	Smp_142410.1	20.98	5.57	1.74223	4.78398	TRINITY_DN14653_c0_g1; TRINITY_DN23663_c0_g1	retrovirus Pol polyprotein from type 1 evidence Inferred from Electronic Annotation
1014	Smp_134700.1	248.33	73.99	1.73329	8.33682	TRINITY_DN21252_c7_g4	hypothetical protein evidence Inferred from Electronic Annotation
1015	Smp_130690.1	146.6	43.42	1.73241	7.57758	TRINITY_DN1474_c0_g1; TRINITY_DN15196_c0_g1; TRINITY_DN15793_c0_g1; TRINITY_DN22122_c0_g1; TRINITY_DN22122_c0_g3; TRINITY_DN8139_c0_g1	zinc finger SWIM domain containing protein 5 evidence Inferred from Electronic Annotation
1016	Smp_198010.1	17.17	4.47	1.73195	4.5008	TRINITY_DN20463_c0_g1; TRINITY_DN20463_c0_g3	arf GAP with GTPase%2C ANK repeat and PH evidence Inferred from Electronic Annotation
1017	Smp_084830.1	20.2	5.39	1.73018	4.73281	TRINITY_DN13748_c0_g1; TRINITY_DN23765_c2_g5; TRINITY_DN36844_c0_g1; TRINITY_DN43875_c0_g1; TRINITY_DN48392_c0_g1	UDP glucose 6 dehydrogenase evidence Inferred from Electronic Annotation
1020	Smp_018250.2	29.56	8.23	1.72724	5.27761	TRINITY_DN22993_c0_g1	troponin i evidence Inferred from Electronic Annotation
1021	Smp_126600.1	12.23	3	1.72574	4.02059	TRINITY_DN10879_c0_g1; TRINITY_DN12928_c0_g1; TRINITY_DN4234_c0_g1; TRINITY_DN46640_c0_g1; TRINITY_DN48511_c0_g1; TRINITY_DN8481_c0_g1	hypothetical protein evidence Inferred from Electronic Annotation
1022	Smp_155840.1	42.06	12.02	1.72562	5.78346	TRINITY_DN13916_c0_g1; TRINITY_DN13916_c0_g2; TRINITY_DN20027_c1_g1	cellular myosin heavy chain evidence Inferred from Electronic Annotation
1023	Smp_020270.1	19.94	5.34	1.72371	4.71589	TRINITY_DN10520_c0_g1; TRINITY_DN10937_c0_g1; TRINITY_DN590_c0_g1	high voltage-activated calcium channel Cav1 db_xref PMID:11719960 evidence Traceable Author Statemen
1024	Smp_214240.1	28.85	8.04	1.72334	5.24375	TRINITY_DN11713_c0_g3; TRINITY_DN19935_c1_g1; TRINITY_DN2728_c0_g1; TRINITY_DN30848_c0_g1; TRINITY_DN60829_c0_g1; TRINITY_DN70235_c0_g1	kinase suppressor of Ras (KSR) evidence Inferred from Electronic Annotation
1025	Smp_084610.1	41.52	11.88	1.72301	5.76553	TRINITY_DN21030_c1_g1; TRINITY_DN23874_c5_g2	FAS associated factor 2 evidence Inferred from Electronic Annotation
1027	Smp_125790.1	38.48	10.97	1.7217	5.65678	TRINITY_DN16898_c0_g1; TRINITY_DN30739_c0_g1; TRINITY_DN49090_c0_g1	Actin protein 5 evidence Inferred from Electronic Annotation
1028	Smp_136660.1	24.11	6.62	1.7204	4.98778	TRINITY_DN22605_c0_g7; TRINITY_DN49335_c0_g1	pro neuregulin 2 evidence Inferred from Electronic Annotation,term pro neuregulin 2 membrane bound evidence Inferred from Electronic Annotation
1029	Smp_158560.1	27.71	7.73	1.7175	5.18745	TRINITY_DN12634_c0_g1; TRINITY_DN12634_c0_g3; TRINITY_DN20189_c0_g2; TRINITY_DN29862_c0_g1; TRINITY_DN751_c0_g1	-
1030	Smp_179070.1	24.92	6.92	1.71049	5.03738	TRINITY_DN23675_c0_g1	Ribosomal protein S6 kinase beta 2 evidence Inferred from Electronic Annotation
1034	Smp_127930.1	28.64	8.07	1.70837	5.23688	TRINITY_DN19621_c0_g1	hypothetical protein evidence Inferred from Electronic Annotation
1035	Smp_091750.1	84.23	25.13	1.70565	6.78607	TRINITY_DN19703_c0_g2; TRINITY_DN68087_c0_g1	hypothetical protein evidence Inferred from Electronic Annotation
1039	Smp_057130.1	69.88	20.77	1.70304	6.51806	TRINITY_DN16512_c0_g1; TRINITY_DN23610_c2_g3; TRINITY_DN33829_c0_g1; TRINITY_DN37993_c0_g1; TRINITY_DN57404_c0_g1	adiponectin receptor protein 2 evidence Inferred from Electronic Annotation
1041	Smp_158960.1	55.68	16.42	1.7021	6.1918	TRINITY_DN17934_c0_g1	hypothetical protein evidence Inferred from Electronic Annotation
1042	Smp_039670.1	43.76	12.77	1.70068	5.84624	TRINITY_DN22673_c0_g1; TRINITY_DN22673_c0_g4; TRINITY_DN22673_c0_g5; TRINITY_DN22673_c0_g6	Cyclin L1 evidence Inferred from Electronic Annotation
1045	Smp_029520.1	12.19	3.07	1.69634	4.02326	TRINITY_DN17697_c5_g1; TRINITY_DN19656_c1_g1	actin binding lim protein 1 evidence Inferred from Electronic Annotation
1046	Smp_213890.1	735.66	226.41	1.6957	9.9115	TRINITY_DN19724_c14_g1; TRINITY_DN23605_c0_g1	spectrin beta chain%2C brain 4 evidence Inferred from Electronic Annotation
1047	Smp_156990.1	47.63	14.02	1.69496	5.96924	TRINITY_DN16679_c0_g1; TRINITY_DN16679_c0_g4; TRINITY_DN19017_c0_g1	cyclin dependent kinase 19 evidence Inferred from Electronic Annotation
1048	Smp_016780.1	141.05	42.91	1.69378	7.53107	TRINITY_DN22592_c0_g1	alpha tubulin evidence Inferred from Electronic Annotation
1050	Smp_023990.1	17.99	4.88	1.69135	4.57713	TRINITY_DN12536_c0_g1; TRINITY_DN17997_c0_g1; TRINITY_DN17997_c0_g2; TRINITY_DN20204_c1_g13	YY1 transcription factor evidence Inferred from Electronic Annotation
1051	Smp_168920.1	15.1	3.99	1.68995	4.32841	TRINITY_DN17373_c0_g1	WD repeat domain 36 evidence Inferred from Electronic Annotation
1052	Smp_135900.1	121.86	37.1	1.68915	7.32157	TRINITY_DN22657_c1_g2; TRINITY_DN23864_c5_g2	DNA double strand break repair rad50 ATPase evidence Inferred from Electronic Annotation
1053	Smp_080920.1	58.04	17.31	1.68906	6.25456	TRINITY_DN14594_c0_g3	hypothetical protein evidence Inferred from Electronic Annotation
1054	Smp_194090.1	15.21	4.03	1.68825	4.33914	TRINITY_DN18227_c0_g1; TRINITY_DN21213_c6_g16; TRINITY_DN53727_c0_g1	subfamily S1A unassigned peptidase (S01 family) with UniProtKB:C4QUA1 evidence Non-traceable Author Statemen
1055	Smp_050540.1	62.74	18.8	1.6867	6.36702	TRINITY_DN12300_c0_g1; TRINITY_DN20308_c2_g1; TRINITY_DN21070_c1_g9; TRINITY_DN23390_c1_g1; TRINITY_DN23390_c1_g2; TRINITY_DN299_c0_g1; TRINITY_DN45098_c0_g1	uridine 5' monophosphate synthase evidence Inferred from Electronic Annotation
1057	Smp_172060.1	18.74	5.14	1.68481	4.63691	TRINITY_DN3049_c0_g1; TRINITY_DN3049_c0_g2	exostosin 1b evidence Inferred from Electronic Annotation
1058	Smp_153840.1	31.92	9.24	1.68475	5.3978	TRINITY_DN16565_c0_g1; TRINITY_DN19384_c0_g1; TRINITY_DN25498_c0_g1	neurobeachin evidence Inferred from Electronic Annotation
1059	Smp_045220.1	57.04	17.08	1.68265	6.23113	TRINITY_DN21132_c0_g1	myosin light chain evidence Inferred from Sequence Alignment,term myosin essential light chain striated adductor evidence Inferred from Electronic Annotation
1062	Smp_090450.1	22.88	6.46	1.67856	4.92315	TRINITY_DN10066_c0_g1; TRINITY_DN19958_c0_g1; TRINITY_DN68145_c0_g1	Host cell factor (dHcf) (Contains: HCF evidence Inferred from Electronic Annotation
1063	Smp_143380.1	42.12	12.48	1.67754	5.79701	TRINITY_DN18680_c0_g1; TRINITY_DN3530_c0_g1; TRINITY_DN43183_c0_g1; TRINITY_DN57945_c0_g1; TRINITY_DN9102_c1_g1; TRINITY_DN9862_c0_g1	mismatch repair endonuclease PMS2 evidence Inferred from Electronic Annotation
1066	Smp_038440.1	82.42	25.12	1.67524	6.76208	TRINITY_DN21902_c0_g1	cGMP-dependent protein kinase%2C interacting domain%2C putative with InterPro:IPR031775 evidence Inferred from Sequence Model
1069	Smp_157550.1	12.49	3.23	1.67316	4.0635	TRINITY_DN5202_c0_g1; TRINITY_DN59682_c0_g1; TRINITY_DN62102_c0_g1	par 3 partitioning defective 3 evidence Inferred from Electronic Annotation
1070	Smp_150560.1	22.79	6.47	1.67118	4.91934	TRINITY_DN18894_c0_g1; TRINITY_DN8775_c0_g1; TRINITY_DN8775_c0_g2	lysine specific histone demethylase 1A evidence Inferred from Electronic Annotation
1075	Smp_065290.1	21.06	5.94	1.66843	4.80735	TRINITY_DN11798_c0_g1	calcium:calmodulin dependent protein kinase I evidence Inferred from Electronic Annotation
1076	Smp_197190.1	13.65	3.61	1.66806	4.19061	TRINITY_DN38244_c0_g1; TRINITY_DN43284_c0_g1; TRINITY_DN5048_c0_g1; TRINITY_DN50916_c0_g1; TRINITY_DN51778_c0_g1	SEC23 interacting protein evidence Inferred from Electronic Annotation
1078	Smp_041370.1	17.37	4.81	1.66074	4.53481	TRINITY_DN10664_c0_g1; TRINITY_DN13204_c0_g1; TRINITY_DN13204_c0_g2; TRINITY_DN24770_c0_g1	hypothetical protein evidence Inferred from Electronic Annotation
1082	Smp_180200.1	66.78	20.51	1.65585	6.46418	TRINITY_DN14527_c0_g1; TRINITY_DN21792_c0_g1; TRINITY_DN22750_c0_g1; TRINITY_DN58983_c0_g1	zinc finger%2C CCHC domain containing 6 evidence Inferred from Electronic Annotation
1083	Smp_141830.1	25.4	7.38	1.65552	5.0781	TRINITY_DN23609_c2_g10; TRINITY_DN23864_c8_g1	transcriptional enhancer factor tef evidence Inferred from Electronic Annotation
1084	Smp_156170.1	39.56	11.89	1.65381	5.71287	TRINITY_DN14748_c0_g1; TRINITY_DN20454_c1_g1; TRINITY_DN20454_c1_g2; TRINITY_DN25253_c0_g1; TRINITY_DN49939_c0_g1; TRINITY_DN52311_c0_g1	hypothetical protein evidence Inferred from Electronic Annotation
1085	Smp_246920.1	12.15	3.18	1.65349	4.02945	TRINITY_DN2169_c0_g1; TRINITY_DN27250_c0_g1; TRINITY_DN4343_c0_g1; TRINITY_DN4343_c0_g2	bromodomain and PHD finger containing protein 1 evidence Inferred from Electronic Annotation
1086	Smp_170810.1	31.76	9.43	1.6512	5.39883	TRINITY_DN11026_c0_g1; TRINITY_DN11026_c0_g2; TRINITY_DN17204_c0_g1; TRINITY_DN24939_c0_g1; TRINITY_DN55101_c0_g1	FMRFamide activated amiloride sensitive sodium evidence Inferred from Electronic Annotation
1087	Smp_035580.1	25.11	7.32	1.64995	5.06307	TRINITY_DN17799_c0_g1	serine:threonine protein phosphatase PP1 beta evidence Inferred from Electronic Annotation
1088	Smp_100080.1	41.83	12.67	1.64761	5.79442	TRINITY_DN14211_c0_g1; TRINITY_DN14211_c0_g2; TRINITY_DN23706_c5_g1; TRINITY_DN23706_c5_g3	Tetraspanin%2CIPR000301 CD9:CD37:CD63 evidence Inferred from Electronic Annotation
1089	Smp_085680.1	55.09	16.91	1.64698	6.18982	TRINITY_DN17328_c0_g1; TRINITY_DN34851_c0_g1	atrial natriuretic peptide receptor 1 evidence Inferred from Electronic Annotation
1096	Smp_212350.1	26.68	7.92	1.63373	5.15381	TRINITY_DN23303_c2_g1; TRINITY_DN23303_c2_g2; TRINITY_DN31946_c0_g1; TRINITY_DN6994_c0_g2	forkhead box protein P1 evidence Inferred from Electronic Annotation
1099	Smp_018210.1	61.08	19.08	1.62837	6.3427	TRINITY_DN19425_c0_g1	hypothetical protein evidence Inferred from Electronic Annotation
1101	Smp_059780.1	46.27	14.41	1.61706	5.94673	TRINITY_DN12214_c0_g1; TRINITY_DN20150_c0_g1	protoscolex specific coiled coil protein evidence Inferred from Electronic Annotation
1102	Smp_031680.1	17.61	5.07	1.61631	4.5656	TRINITY_DN23609_c2_g11; TRINITY_DN23609_c2_g14	nicotinic acetylcholine receptor with UniProtKB:V9TII8 evidence Non-traceable Author Statemen
1103	Smp_165200.1	15.36	4.34	1.61526	4.37156	TRINITY_DN18556_c0_g1; TRINITY_DN22798_c2_g2; TRINITY_DN23666_c0_g16	hypothetical protein evidence Inferred from Electronic Annotation
1106	Smp_145080.1	15.02	4.24	1.61224	4.34056	TRINITY_DN16985_c0_g1; TRINITY_DN2776_c0_g1; TRINITY_DN2776_c0_g2; TRINITY_DN7724_c0_g1	hypothetical protein evidence Inferred from Electronic Annotation
1107	Smp_163360.1	21.81	6.47	1.61049	4.87184	TRINITY_DN15156_c0_g2; TRINITY_DN21754_c1_g1; TRINITY_DN2231_c0_g1; TRINITY_DN2231_c0_g2	dystrophin evidence Inferred from Electronic Annotation
1108	Smp_019790.1	12.25	3.34	1.61023	4.05224	TRINITY_DN12345_c0_g2; TRINITY_DN33536_c0_g1; TRINITY_DN3438_c0_g1; TRINITY_DN3438_c0_g2; TRINITY_DN46803_c0_g1	tyrosine kinase db_xref PMID:12554084 evidence Traceable Author Statemen
1109	Smp_212490.1	45.6	14.28	1.60869	5.9279	TRINITY_DN20784_c0_g1; TRINITY_DN20784_c0_g2; TRINITY_DN23887_c11_g10; TRINITY_DN23887_c11_g11; TRINITY_DN23887_c11_g3; TRINITY_DN29714_c0_g1	protein transport protein Sec31A evidence Inferred from Electronic Annotation
1112	Smp_124780.1	56.92	18.05	1.60427	6.24736	TRINITY_DN11126_c1_g1; TRINITY_DN18971_c2_g2; TRINITY_DN19467_c0_g1; TRINITY_DN21273_c0_g2; TRINITY_DN22808_c0_g1; TRINITY_DN2432_c0_g1; TRINITY_DN2432_c0_g2; TRINITY_DN25871_c0_g1	AT rich interactive domain containing protein evidence Inferred from Electronic Annotation
1114	Smp_165210.1	47.96	15.12	1.60275	6.0018	TRINITY_DN122_c0_g1; TRINITY_DN122_c0_g2; TRINITY_DN16796_c0_g1; TRINITY_DN22956_c5_g3; TRINITY_DN23895_c7_g19; TRINITY_DN23895_c7_g20; TRINITY_DN23895_c7_g25; TRINITY_DN23895_c7_g27; TRINITY_DN23895_c7_g29; TRINITY_DN49676_c1_g1; TRINITY_DN68309_c0_g1; TRINITY_DN70748_c0_g1	serine:threonine protein kinase 17A evidence Inferred from Electronic Annotation
1115	Smp_150220.2	175.19	57.19	1.59829	7.86654	TRINITY_DN17565_c0_g2; TRINITY_DN26064_c0_g1; TRINITY_DN62016_c0_g1	protein tyrosine phosphatase%2C receptor type%2C N evidence Inferred from Electronic Annotation
1117	Smp_145350.1	26.1	7.97	1.59511	5.13217	TRINITY_DN15251_c0_g1; TRINITY_DN15251_c0_g2; TRINITY_DN15251_c0_g3; TRINITY_DN15251_c0_g4; TRINITY_DN18971_c0_g1; TRINITY_DN23393_c1_g7	ubiquitin conjugating enzyme E2 H evidence Inferred from Electronic Annotation
1118	Smp_140260.1	45.99	14.58	1.59266	5.94416	TRINITY_DN14043_c0_g1; TRINITY_DN14043_c0_g2; TRINITY_DN17952_c0_g1; TRINITY_DN17952_c0_g2; TRINITY_DN17952_c0_g3; TRINITY_DN25588_c0_g1	apoptotic protease activating factor 1 evidence Inferred from Electronic Annotation
1120	Smp_127010.1	27.54	8.48	1.59003	5.21023	TRINITY_DN11557_c0_g1; TRINITY_DN17211_c0_g1; TRINITY_DN32663_c0_g1; TRINITY_DN48288_c0_g1	CREB binding protein db_xref PMID:16427147 evidence Traceable Author Statemen
1121	Smp_150750.1	13.33	3.76	1.59001	4.17712	TRINITY_DN17554_c0_g1; TRINITY_DN61300_c0_g1; TRINITY_DN982_c0_g1	centrosomal protein 110 kDa evidence Inferred from Electronic Annotation
1122	Smp_127810.1	16.43	4.79	1.58994	4.47379	TRINITY_DN11143_c0_g1; TRINITY_DN26748_c0_g1; TRINITY_DN43564_c0_g1; TRINITY_DN43564_c0_g2; TRINITY_DN6493_c0_g1; TRINITY_DN67025_c0_g1; TRINITY_DN9550_c0_g1	cell adhesion molecule:down regulated by evidence Inferred from Electronic Annotation
1125	Smp_246050.1	33.53	10.52	1.58371	5.49346	TRINITY_DN18192_c0_g1; TRINITY_DN21889_c0_g1; TRINITY_DN21889_c0_g2; TRINITY_DN52776_c0_g1	vinculin with InterPro:IPR006077 evidence Inferred from Sequence Model
1127	Smp_157340.1	13.68	3.9	1.583	4.21568	TRINITY_DN20787_c0_g1	rassf1 evidence Inferred from Electronic Annotation
1128	Smp_031770.5	18.92	5.66	1.58062	4.67694	TRINITY_DN14139_c0_g1	tropomyosin evidence Inferred from Electronic Annotation
1131	Smp_140510.1	15.69	4.6	1.57549	4.4121	TRINITY_DN21349_c0_g2	TLC domain containing protein 2 evidence Inferred from Electronic Annotation
1132	Smp_098370.2	30.29	9.5	1.57531	5.35014	TRINITY_DN22551_c0_g1	uncharacterized aarF domain containing protein evidence Inferred from Electronic Annotation
1133	Smp_132170.1	18.43	5.54	1.57092	4.64212	TRINITY_DN18590_c0_g1; TRINITY_DN45946_c0_g1; TRINITY_DN9538_c0_g1; TRINITY_DN9538_c0_g2	jumonji domain containing protein evidence Inferred from Electronic Annotation
1135	Smp_152520.1	49.23	15.98	1.56471	6.04898	TRINITY_DN22831_c0_g1	cpg binding protein evidence Inferred from Electronic Annotation
1136	Smp_144620.1	45.92	14.9	1.56118	5.95	TRINITY_DN15162_c0_g1; TRINITY_DN15162_c0_g2; TRINITY_DN15625_c0_g4; TRINITY_DN23310_c2_g7; TRINITY_DN23847_c4_g1; TRINITY_DN23847_c4_g31; TRINITY_DN23847_c4_g34; TRINITY_DN40652_c0_g1	regulator of G protein signaling 3 evidence Inferred from Electronic Annotation
1137	Smp_086960.1	18.74	5.69	1.56104	4.66846	TRINITY_DN9413_c0_g1	Lipoyltransferase 1%2C mitochondrial evidence Inferred from Electronic Annotation
1138	Smp_212290.1	12.41	3.55	1.55937	4.08406	TRINITY_DN2196_c0_g1; TRINITY_DN42450_c0_g1	dynein heavy chain evidence Inferred from Electronic Annotation
1139	Smp_054810.1	28.08	8.87	1.55891	5.24603	TRINITY_DN16413_c1_g1; TRINITY_DN20285_c0_g2	hypothetical protein evidence Inferred from Electronic Annotation
1141	Smp_246890.1	38.37	12.37	1.5581	5.69321	TRINITY_DN10597_c0_g1; TRINITY_DN10615_c0_g1; TRINITY_DN15500_c0_g1	hypothetical protein evidence Inferred from Electronic Annotation
1143	Smp_175210.1	246.7	83.32	1.55465	8.37077	TRINITY_DN19012_c0_g2	enhancer of rudimentary evidence Inferred from Electronic Annotation
1144	Smp_126450.1	17.59	5.33	1.55425	4.58015	TRINITY_DN19768_c0_g1	ATP binding cassette sub family G evidence Inferred from Electronic Annotation
1146	Smp_212600.1	49.49	16.22	1.55191	6.05983	TRINITY_DN19554_c1_g1; TRINITY_DN22598_c3_g2; TRINITY_DN22598_c3_g6; TRINITY_DN23874_c6_g9; TRINITY_DN32398_c0_g1	protein kinase evidence Inferred from Electronic Annotation
1147	Smp_141650.1	40.57	13.19	1.55067	5.77505	TRINITY_DN22112_c0_g1	hypothetical protein evidence Inferred from Electronic Annotation
1148	Smp_057210.1	175.53	59.33	1.54897	7.88179	TRINITY_DN21147_c0_g1	hypothetical protein evidence Inferred from Electronic Annotation
1149	Smp_131770.1	17061	5837.24	1.54718	14.483	TRINITY_DN18717_c0_g1; TRINITY_DN19647_c0_g1; TRINITY_DN19647_c0_g8; TRINITY_DN19847_c2_g9; TRINITY_DN25640_c0_g1; TRINITY_DN53631_c0_g1; TRINITY_DN58958_c0_g1; TRINITY_DN64814_c0_g1	ATP dependent RNA helicase DDX42 evidence Inferred from Electronic Annotation
1152	Smp_123940.1	64.35	21.4	1.54469	6.43879	TRINITY_DN22852_c0_g2; TRINITY_DN56651_c0_g1; TRINITY_DN56651_c0_g2; TRINITY_DN7961_c0_g1; TRINITY_DN7961_c0_g2	DNA repair protein complementing XP G cells evidence Inferred from Electronic Annotation
1153	Smp_243870.1	332.85	113.47	1.54423	8.80516	TRINITY_DN13005_c0_g1; TRINITY_DN22506_c0_g1; TRINITY_DN47178_c0_g1	dnaJ subfamily C 6 evidence Inferred from Electronic Annotation
1154	Smp_154760.1	27.42	8.76	1.54195	5.21645	TRINITY_DN13782_c0_g1; TRINITY_DN13782_c0_g2	egf domain protein evidence Inferred from Electronic Annotation
1155	Smp_167920.1	16.68	5.08	1.53998	4.50843	TRINITY_DN20187_c0_g1; TRINITY_DN32638_c0_g1; TRINITY_DN40431_c0_g1	ubinuclein 2 evidence Inferred from Electronic Annotation
1156	Smp_246190.1	33.4	10.83	1.53996	5.49921	TRINITY_DN15606_c0_g1; TRINITY_DN2167_c0_g1; TRINITY_DN25108_c0_g1; TRINITY_DN32913_c0_g1; TRINITY_DN46934_c0_g1	membrane associated guanylate kinase%2C WW and PDZ evidence Inferred from Electronic Annotation
1160	Smp_166310.1	30.61	9.9	1.53605	5.37539	TRINITY_DN21514_c0_g1; TRINITY_DN42826_c0_g1	ran gtpase activating protein evidence Inferred from Electronic Annotation
1162	Smp_152620.1	16.23	4.96	1.53154	4.47184	TRINITY_DN23269_c0_g6	protein hook 3 evidence Inferred from Electronic Annotation
1163	Smp_147410.1	65.29	21.97	1.52904	6.46369	TRINITY_DN16973_c1_g1	cdk5 regulatory subunit associated protein 1 evidence Inferred from Electronic Annotation
1165	Smp_176350.1	13.06	3.88	1.52664	4.16511	TRINITY_DN14572_c0_g1; TRINITY_DN14574_c0_g1	contactin neuroglian septate junction protein evidence Inferred from Electronic Annotation,term contactin evidence Inferred from Electronic Annotation
1166	Smp_157820.1	11.69	3.41	1.52484	4.00899	TRINITY_DN10477_c0_g1; TRINITY_DN862_c0_g1	serine protein kinase ATM evidence Inferred from Electronic Annotation
1168	Smp_196600.1	24.22	7.78	1.52228	5.04439	TRINITY_DN18623_c0_g1	BTB:POZ domain containing protein KCTD3 evidence Inferred from Electronic Annotation
1169	Smp_171710.1	37.84	12.55	1.51925	5.68342	TRINITY_DN12471_c0_g1; TRINITY_DN12878_c0_g3; TRINITY_DN20365_c0_g1; TRINITY_DN54463_c0_g1	structural maintenance of chromosomes protein 2 evidence Inferred from Electronic Annotation
1170	Smp_015780.1	25.74	8.33	1.51905	5.13217	TRINITY_DN23733_c0_g5; TRINITY_DN64899_c0_g1	ATPase N2B evidence Inferred from Electronic Annotation
1173	Smp_212410.1	55.77	18.88	1.51381	6.24127	TRINITY_DN20932_c0_g1; TRINITY_DN24139_c0_g1; TRINITY_DN45709_c0_g1; TRINITY_DN56202_c0_g1	hyperpolarization activated cyclic evidence Inferred from Electronic Annotation
1176	Smp_245970.1	27.58	9.03	1.51068	5.23304	TRINITY_DN133_c0_g1; TRINITY_DN19273_c0_g3; TRINITY_DN5491_c0_g1; TRINITY_DN5491_c0_g2; TRINITY_DN5491_c0_g3; TRINITY_DN67384_c0_g1; TRINITY_DN68531_c0_g1; TRINITY_DN69446_c0_g1; TRINITY_DN8914_c0_g1	centrosomal protein of 135 kda evidence Inferred from Electronic Annotation
1177	Smp_214200.1	20.04	6.39	1.50949	4.77768	TRINITY_DN22945_c0_g1	rhoptry protein evidence Inferred from Electronic Annotation
1178	Smp_063030.1	11.61	3.43	1.50919	4.0036	TRINITY_DN11502_c0_g1	hypothetical protein evidence Inferred from Electronic Annotation
1179	Smp_244360.1	12.34	3.69	1.5081	4.09001	TRINITY_DN8837_c0_g1; TRINITY_DN8837_c0_g2; TRINITY_DN8837_c0_g3	multidrug and toxin extrusion protein 2 evidence Inferred from Electronic Annotation
1181	Smp_129060.1	26.65	8.74	1.50529	5.18547	TRINITY_DN18150_c0_g2; TRINITY_DN48441_c0_g1	solute carrier family 17 evidence Inferred from Electronic Annotation
1182	Smp_073800.1	29.71	9.82	1.50501	5.34092	TRINITY_DN11713_c0_g2; TRINITY_DN21313_c0_g1; TRINITY_DN21313_c0_g3; TRINITY_DN23801_c4_g12; TRINITY_DN23801_c4_g4; TRINITY_DN23801_c4_g8; TRINITY_DN23801_c4_g9; TRINITY_DN59895_c0_g1	recQ mediated genome instability protein 1 evidence Inferred from Electronic Annotation
1183	Smp_145650.1	15.96	4.98	1.50392	4.45549	TRINITY_DN13884_c1_g1; TRINITY_DN16869_c0_g1	forkhead protein: forkhead protein domain evidence Inferred from Electronic Annotation
1185	Smp_160760.1	47.74	16.19	1.50354	6.02081	TRINITY_DN17703_c0_g2; TRINITY_DN20712_c0_g1; TRINITY_DN20712_c0_g2	serine:threonine protein kinase N2 evidence Inferred from Electronic Annotation
1186	Smp_076370.1	397.14	139.45	1.50322	9.07036	TRINITY_DN17628_c0_g3	Proteinase inhibitor I32%2C inhibitor of evidence Inferred from Electronic Annotation
1187	Smp_129770.1	71.51	24.6	1.50204	6.60155	TRINITY_DN1395_c0_g1; TRINITY_DN22739_c0_g3; TRINITY_DN22739_c0_g4; TRINITY_DN57236_c0_g1; TRINITY_DN69062_c0_g1	Ankyrin-like protein with UniProtKB:Q6TL20 evidence Non-traceable Author Statemen
1189	Smp_156890.1	20.8	6.7	1.5014	4.83289	TRINITY_DN23890_c0_g3	hypothetical protein evidence Inferred from Electronic Annotation
1191	Smp_102690.2	31.42	10.48	1.49776	5.42291	TRINITY_DN23183_c0_g3; TRINITY_DN23183_c0_g7; TRINITY_DN65119_c0_g1	Argonaute
1192	Smp_084380.1	55.48	19.02	1.4963	6.2384	TRINITY_DN23101_c0_g1	Cleavage and polyadenylation specificity factor evidence Inferred from Electronic Annotation
1194	Smp_158820.1	22.85	7.46	1.49526	4.96855	TRINITY_DN1174_c0_g1; TRINITY_DN15330_c0_g1; TRINITY_DN21998_c4_g1; TRINITY_DN37977_c0_g1; TRINITY_DN41292_c0_g1; TRINITY_DN4430_c0_g1; TRINITY_DN47179_c0_g1; TRINITY_DN48923_c0_g1; TRINITY_DN64945_c0_g1; TRINITY_DN8209_c0_g1	myotubularin protein 13 evidence Inferred from Electronic Annotation
1196	Smp_197180.1	150.46	52.8	1.49326	7.67426	TRINITY_DN22382_c0_g1; TRINITY_DN68602_c0_g1	apoptosis inhibitor 5 evidence Inferred from Electronic Annotation
1199	Smp_149460.1	17.7	5.66	1.48944	4.60644	TRINITY_DN13397_c0_g1; TRINITY_DN15953_c0_g1; TRINITY_DN57735_c0_g1; TRINITY_DN71710_c0_g1	Tyrosine Kinase%2C TK group%2C SYK family ,term tyrosine protein kinase SYK db_xref PMID:12234670 evidence Traceable Author Statemen
1200	Smp_198330.1	96.27	33.66	1.48872	7.03265	TRINITY_DN11328_c0_g1; TRINITY_DN11328_c0_g2; TRINITY_DN12927_c0_g2; TRINITY_DN14918_c0_g1; TRINITY_DN22861_c0_g1; TRINITY_DN22923_c1_g3; TRINITY_DN23763_c0_g1; TRINITY_DN23763_c0_g3; TRINITY_DN23763_c0_g4; TRINITY_DN23763_c0_g5; TRINITY_DN23763_c0_g6	zinc finger protein 291 evidence Inferred from Electronic Annotation
1201	Smp_138590.1	30.6	10.26	1.48872	5.3875	TRINITY_DN14786_c0_g4; TRINITY_DN18203_c1_g5	3-hydroxy-3-methylglutaryl-coenzyme A reductase db_xref PMID:2813388
1202	Smp_212070.1	131.41	46.23	1.48724	7.48091	TRINITY_DN23907_c8_g1; TRINITY_DN23907_c8_g10; TRINITY_DN23907_c8_g15; TRINITY_DN23907_c8_g4; TRINITY_DN23907_c8_g7	hypothetical protein evidence Inferred from Electronic Annotation
1204	Smp_012010.1	26.44	8.8	1.48543	5.17951	TRINITY_DN23511_c0_g4; TRINITY_DN49445_c0_g1	forkhead box subgroup O evidence Inferred from Electronic Annotation
1205	Smp_214190.1	41.51	14.2	1.48373	5.82553	TRINITY_DN22687_c0_g3	calpain db_xref PMID:1869543 evidence Traceable Author Statemen
1206	Smp_245960.1	15.3	4.83	1.4833	4.40122	TRINITY_DN17766_c0_g1	hypothetical protein evidence Inferred from Electronic Annotation
1207	Smp_152280.1	32.06	10.83	1.48264	5.45582	TRINITY_DN16135_c0_g1	beta arrestin evidence Inferred from Electronic Annotation
1208	Smp_165420.1	48.03	16.55	1.48219	6.03518	TRINITY_DN13853_c0_g1; TRINITY_DN21529_c0_g1; TRINITY_DN24338_c0_g1; TRINITY_DN40305_c0_g1; TRINITY_DN40305_c0_g2; TRINITY_DN44525_c0_g1; TRINITY_DN57631_c0_g1	zinc finger protein evidence Inferred from Electronic Annotation
1209	Smp_137870.1	37.32	12.72	1.48182	5.67356	TRINITY_DN22331_c0_g3	StAR lipid transfer (START) domain evidence Inferred from Electronic Annotation
1210	Smp_025410.1	100.93	35.52	1.48082	7.10276	TRINITY_DN20571_c0_g1	calcium dependent mitochondrial carrier protein evidence Inferred from Electronic Annotation
1214	Smp_143470.2	80.08	28.13	1.47684	6.77096	TRINITY_DN14311_c0_g1; TRINITY_DN14311_c0_g2; TRINITY_DN19988_c0_g1; TRINITY_DN19988_c0_g2; TRINITY_DN20321_c1_g3; TRINITY_DN21065_c0_g2; TRINITY_DN55910_c0_g1; TRINITY_DN9089_c0_g2	spectrin beta chain evidence Inferred from Electronic Annotation
1215	Smp_161680.1	58.45	20.36	1.47677	6.3185	TRINITY_DN21806_c1_g1; TRINITY_DN69670_c0_g1	phosphorylase B kinase beta%2C kpbb evidence Inferred from Electronic Annotation
1216	Smp_175120.1	316.58	113.19	1.47568	8.75077	TRINITY_DN10602_c0_g1; TRINITY_DN23799_c0_g1; TRINITY_DN23799_c0_g3; TRINITY_DN23799_c0_g4; TRINITY_DN23799_c0_g5; TRINITY_DN23799_c0_g6	Alpha (1%2C6) fucosyltransferase (EC 2 evidence Inferred from Electronic Annotation
1218	Smp_139350.1	8394.32	3019.44	1.47483	13.4786	TRINITY_DN17408_c0_g2; TRINITY_DN19847_c2_g7; TRINITY_DN23100_c0_g1; TRINITY_DN56164_c0_g1; TRINITY_DN71498_c0_g1	hypothetical protein evidence Inferred from Electronic Annotation
1219	Smp_173240.1	27.29	9.19	1.47314	5.22805	TRINITY_DN19131_c0_g1; TRINITY_DN6469_c0_g1	cement protein 3B variant 3 evidence Inferred from Electronic Annotation
1220	Smp_130470.1	46.46	16.11	1.47187	5.99027	TRINITY_DN16003_c0_g1; TRINITY_DN16003_c0_g2; TRINITY_DN24884_c0_g1; TRINITY_DN33954_c0_g1; TRINITY_DN44835_c0_g1; TRINITY_DN51883_c0_g1; TRINITY_DN68046_c0_g1	chromodomain helicase DNA binding protein evidence Inferred from Electronic Annotation
1221	Smp_142620.1	26.83	9.04	1.47088	5.20438	TRINITY_DN1158_c0_g1; TRINITY_DN15113_c0_g1; TRINITY_DN15502_c0_g1; TRINITY_DN16733_c0_g1; TRINITY_DN16733_c0_g2	atrial natriuretic peptide receptor 1 evidence Inferred from Electronic Annotation
1223	Smp_130520.1	91.71	32.48	1.46943	6.96798	TRINITY_DN18637_c0_g2; TRINITY_DN23791_c0_g1; TRINITY_DN23791_c0_g2	prominin protein like evidence Inferred from Electronic Annotation
1226	Smp_248030.1	71.87	25.37	1.46643	6.61824	TRINITY_DN23122_c0_g1	serine incorporator 1 evidence Inferred from Electronic Annotation
1227	Smp_042300.1	146.44	52.47	1.46333	7.64321	TRINITY_DN20596_c0_g2	PUR alpha protein evidence Inferred from Electronic Annotation
1228	Smp_160240.1	34.99	12.07	1.46134	5.58676	TRINITY_DN13354_c0_g1; TRINITY_DN13354_c0_g2; TRINITY_DN13437_c0_g1; TRINITY_DN13437_c0_g4; TRINITY_DN14910_c0_g2; TRINITY_DN14910_c0_g3; TRINITY_DN14910_c0_g4; TRINITY_DN14910_c0_g5; TRINITY_DN14910_c0_g6; TRINITY_DN61865_c0_g1	furin 1 (S08 family) evidence Inferred from Electronic Annotation
1229	Smp_020090.1	125.1	44.84	1.45989	7.41735	TRINITY_DN14912_c0_g1; TRINITY_DN14912_c0_g2; TRINITY_DN14912_c0_g3; TRINITY_DN14912_c0_g5; TRINITY_DN16247_c0_g2; TRINITY_DN22069_c2_g5; TRINITY_DN22069_c2_g6; TRINITY_DN22069_c2_g7; TRINITY_DN22069_c2_g9; TRINITY_DN23217_c3_g1; TRINITY_DN23867_c0_g2; TRINITY_DN23895_c7_g16; TRINITY_DN23895_c7_g18; TRINITY_DN23895_c7_g8; TRINITY_DN24625_c0_g1	stem cell tumor evidence Inferred from Electronic Annotation
1232	Smp_078780.1	63.54	22.52	1.45631	6.44394	TRINITY_DN21295_c0_g1	dihydropyrimidinase protein 1 evidence Inferred from Electronic Annotation
1235	Smp_075220.2	52.2	18.41	1.45463	6.16209	TRINITY_DN17999_c0_g1; TRINITY_DN17999_c0_g3; TRINITY_DN17999_c0_g5; TRINITY_DN17999_c0_g6; TRINITY_DN21742_c0_g2; TRINITY_DN22795_c0_g1; TRINITY_DN23510_c1_g1; TRINITY_DN23510_c1_g2; TRINITY_DN23867_c3_g14; TRINITY_DN23909_c19_g18; TRINITY_DN356_c0_g1	mitochondrial intermediate peptidase evidence Inferred from Electronic Annotation
1236	Smp_153760.2	96.41	34.55	1.45422	7.04396	TRINITY_DN17479_c0_g1; TRINITY_DN21070_c1_g6; TRINITY_DN48839_c0_g1	DNA directed RNA polymerase III subunit evidence Inferred from Electronic Annotation
1239	Smp_086530.1	2376.29	867.03	1.4535	11.6637	TRINITY_DN15678_c0_g1	tegument-allergen-like protein evidence Inferred from Experimen
1240	Smp_143010.1	14.39	4.62	1.45335	4.32265	TRINITY_DN15322_c0_g1; TRINITY_DN17205_c0_g2	nephrocystin 1 evidence Inferred from Electronic Annotation
1241	Smp_074080.1	22.45	7.57	1.45222	4.95513	TRINITY_DN65889_c0_g1; TRINITY_DN65889_c0_g2; TRINITY_DN71362_c0_g1; TRINITY_DN9850_c0_g1; TRINITY_DN9850_c0_g2	serine:threonine protein kinase NLK evidence Inferred from Electronic Annotation
1245	Smp_163230.1	21.45	7.24	1.446	4.89191	TRINITY_DN22375_c0_g1	propionyl coenzyme A carboxylase beta chain evidence Inferred from Electronic Annotation
1246	Smp_148010.1	55.98	19.92	1.44557	6.26491	TRINITY_DN18850_c0_g1; TRINITY_DN22252_c0_g1; TRINITY_DN22252_c0_g2	snf2 histone linker phd ring helicase evidence Inferred from Electronic Annotation
1247	Smp_147560.1	26.45	9.09	1.44388	5.1914	TRINITY_DN16741_c0_g1; TRINITY_DN16741_c0_g2; TRINITY_DN22298_c0_g1; TRINITY_DN23176_c0_g1; TRINITY_DN38017_c0_g1	Mediator of RNA polymerase II transcription evidence Inferred from Electronic Annotation
1248	Smp_247230.1	18.27	6.09	1.4425	4.66448	TRINITY_DN22671_c4_g1; TRINITY_DN23119_c0_g1; TRINITY_DN62593_c0_g1	RNA binding motif single stranded interacting evidence Inferred from Electronic Annotation
1249	Smp_181270.2	21.34	7.22	1.44242	4.88557	TRINITY_DN21919_c0_g1; TRINITY_DN21919_c0_g2	protein couch potato evidence Inferred from Electronic Annotation
1250	Smp_137040.1	47.21	16.75	1.44151	6.02148	TRINITY_DN19877_c0_g1; TRINITY_DN21157_c0_g1; TRINITY_DN61133_c0_g1; TRINITY_DN7962_c0_g2	ubiquitin protein ligase E3B evidence Inferred from Electronic Annotation
1251	Smp_173210.1	11.94	3.77	1.43978	4.06264	TRINITY_DN11553_c0_g1; TRINITY_DN11553_c0_g2	oocyte zinc finger protein XlCOF6 evidence Inferred from Electronic Annotation
1254	Smp_132260.1	13.86	4.49	1.43656	4.27426	TRINITY_DN15194_c0_g1; TRINITY_DN17056_c0_g1; TRINITY_DN50750_c0_g1	serine:threonine protein kinase evidence Inferred from Electronic Annotation
1255	Smp_197280.1	143.49	52.42	1.43552	7.62139	TRINITY_DN22119_c0_g6	phosphatidylinositol 4 phosphate 5 kinase type evidence Inferred from Electronic Annotation
1256	Smp_155040.1	28.85	10.05	1.43368	5.31832	TRINITY_DN16708_c0_g1; TRINITY_DN16708_c0_g2; TRINITY_DN23833_c2_g3	cyclic nucleotide gated cation channel evidence Inferred from Electronic Annotation
1260	Smp_142320.1	13.42	4.35	1.43046	4.23036	TRINITY_DN18063_c0_g1	hypothetical protein evidence Inferred from Electronic Annotation
1261	Smp_128300.1	22.39	7.68	1.43012	4.95745	TRINITY_DN11800_c0_g1; TRINITY_DN12609_c0_g1	ragulator complex protein LAMTOR2 evidence Inferred from Electronic Annotation
1262	Smp_126990.1	12.02	3.84	1.42765	4.07553	TRINITY_DN12176_c0_g1; TRINITY_DN26101_c0_g1	synapsin evidence Inferred from Electronic Annotation
1263	Smp_137530.1	18.23	6.17	1.42331	4.66676	TRINITY_DN20660_c0_g1; TRINITY_DN65341_c0_g1	TATA element modulatory factor evidence Inferred from Electronic Annotation
1264	Smp_039650.1	27.21	9.52	1.42307	5.23764	TRINITY_DN17944_c1_g1; TRINITY_DN17944_c1_g2; TRINITY_DN17944_c1_g3; TRINITY_DN17944_c1_g4; TRINITY_DN17944_c1_g5	disks large 1 evidence Inferred from Electronic Annotation
1270	Smp_131560.1	31.97	11.36	1.41548	5.47021	TRINITY_DN17077_c0_g1; TRINITY_DN17267_c0_g1; TRINITY_DN23886_c6_g2; TRINITY_DN23886_c6_g4	RNA polymerase II subunit A C terminal domain evidence Inferred from Electronic Annotation
1271	Smp_017710.1	12.15	3.93	1.4154	4.09424	TRINITY_DN16354_c0_g1; TRINITY_DN16354_c0_g2; TRINITY_DN1865_c0_g1; TRINITY_DN4158_c0_g1; TRINITY_DN4158_c0_g2; TRINITY_DN8528_c0_g1	rab11 family interacting protein 3 evidence Inferred from Electronic Annotation,term Rab11 family interacting protein 4 evidence Inferred from Electronic Annotation
1273	Smp_160810.1	39.44	14.18	1.41361	5.77136	TRINITY_DN15328_c0_g1; TRINITY_DN17792_c0_g1; TRINITY_DN29788_c0_g1; TRINITY_DN57634_c0_g1	Amine oxidase evidence Inferred from Electronic Annotation
1279	Smp_153640.1	11.65	3.79	1.40104	4.03914	TRINITY_DN13977_c0_g1	high affinity cAMP specific 3' 5' cyclic evidence Inferred from Electronic Annotation
1280	Smp_162100.1	12.37	4.07	1.39894	4.12433	TRINITY_DN20573_c0_g1	transcriptional adapter 3 evidence Inferred from Electronic Annotation
1281	Smp_046930.1	108.74	40.78	1.39321	7.23381	TRINITY_DN23322_c0_g2	O glycosyltransferase evidence Inferred from Electronic Annotation
1282	Smp_074030.1	24.13	8.58	1.39131	5.0751	TRINITY_DN18771_c0_g1; TRINITY_DN44715_c0_g1; TRINITY_DN64326_c0_g1	Receptor protein-tyrosine kinase db_xref PMID:12554084 evidence Traceable Author Statemen
1283	Smp_008620.1	28.22	10.15	1.38991	5.29902	TRINITY_DN20347_c0_g1; TRINITY_DN21342_c3_g1; TRINITY_DN23890_c0_g8; TRINITY_DN7787_c0_g1; TRINITY_DN7787_c0_g2	inactive rhomboid protein 1 evidence Inferred from Electronic Annotation
1288	Smp_246640.1	55.37	20.6	1.3839	6.26622	TRINITY_DN13118_c0_g1; TRINITY_DN21408_c0_g1; TRINITY_DN2427_c0_g1; TRINITY_DN46810_c0_g1; TRINITY_DN53004_c0_g1	vacuolar protein sorting associated protein 13B evidence Inferred from Electronic Annotation
1291	Smp_248010.1	17.41	6.07	1.38071	4.61353	TRINITY_DN22725_c0_g2; TRINITY_DN22725_c0_g3; TRINITY_DN7908_c0_g1; TRINITY_DN7908_c0_g2	Wilms tumor protein 1 interacting protein evidence Inferred from Electronic Annotation
1292	Smp_104030.2	74.73	28.12	1.37885	6.69836	TRINITY_DN23496_c1_g1; TRINITY_DN23512_c0_g1; TRINITY_DN23512_c0_g2; TRINITY_DN23512_c0_g3	cell polarity protein leucine rich repeat evidence Inferred from Electronic Annotation
1295	Smp_204050.1	11.6	3.85	1.37737	4.04002	TRINITY_DN20577_c0_g1; TRINITY_DN20577_c0_g3; TRINITY_DN25004_c0_g1	serine:threonine protein kinase Sgk1 evidence Inferred from Electronic Annotation
1296	Smp_034940.3	15.12	5.21	1.37619	4.41481	TRINITY_DN21823_c0_g1	protein C10orf118 evidence Inferred from Electronic Annotation
1300	Smp_141510.1	13.1	4.44	1.37402	4.21257	TRINITY_DN12026_c0_g1; TRINITY_DN12026_c0_g2	family S9 non peptidase ue (S09 family) evidence Inferred from Electronic Annotation
1302	Smp_057930.1	52.06	19.49	1.3727	6.1809	TRINITY_DN10442_c0_g1; TRINITY_DN10442_c0_g2; TRINITY_DN19097_c0_g1; TRINITY_DN19097_c0_g2; TRINITY_DN20169_c3_g15; TRINITY_DN23021_c7_g1; TRINITY_DN23278_c0_g2; TRINITY_DN23278_c0_g4; TRINITY_DN68274_c0_g1	protoheme IX farnesyltransferase evidence Inferred from Electronic Annotation
1303	Smp_138510.1	11.55	3.85	1.37163	4.03562	TRINITY_DN18993_c0_g1	hypothetical protein evidence Inferred from Electronic Annotation
1306	Smp_144990.1	65.94	24.94	1.36769	6.52168	TRINITY_DN13618_c0_g1; TRINITY_DN19218_c0_g2; TRINITY_DN22069_c2_g2; TRINITY_DN22069_c2_g4; TRINITY_DN22069_c2_g8; TRINITY_DN26226_c0_g1; TRINITY_DN50197_c0_g1	protein lin 10 evidence Inferred from Electronic Annotation
1307	Smp_025550.1	33.85	12.51	1.36713	5.5656	TRINITY_DN22685_c0_g1; TRINITY_DN22685_c0_g2	protein arginine N methyltransferase 7 evidence Inferred from Electronic Annotation
1309	Smp_128150.1	26.77	9.77	1.36651	5.23036	TRINITY_DN23019_c6_g14; TRINITY_DN27433_c0_g1; TRINITY_DN31693_c0_g1; TRINITY_DN5830_c0_g1; TRINITY_DN5830_c0_g2	oxysterol binding protein 1 evidence Inferred from Electronic Annotation
1310	Smp_169870.1	20.78	7.45	1.36598	4.86938	TRINITY_DN19222_c0_g1; TRINITY_DN23666_c0_g6	cystinosin evidence Inferred from Electronic Annotation
1312	Smp_151380.1	72.67	27.6	1.36506	6.66206	TRINITY_DN13423_c1_g1; TRINITY_DN13759_c0_g10; TRINITY_DN13759_c0_g2; TRINITY_DN13759_c0_g5; TRINITY_DN13759_c0_g7; TRINITY_DN19597_c0_g1; TRINITY_DN21722_c0_g5; TRINITY_DN23905_c11_g1; TRINITY_DN23905_c11_g4; TRINITY_DN23905_c11_g6; TRINITY_DN23905_c11_g8; TRINITY_DN24651_c0_g1	anaphase promoting complex subunit 1 evidence Inferred from Electronic Annotation
1314	Smp_101310.1	38.72	14.48	1.35946	5.76022	TRINITY_DN19162_c0_g1	histone H4 transcription factor evidence Inferred from Electronic Annotation
1315	Smp_075400.1	16.49	5.82	1.35869	4.54288	TRINITY_DN22981_c1_g1	hypothetical protein evidence Inferred from Electronic Annotation
1316	Smp_166420.1	29.89	11.05	1.35811	5.39025	TRINITY_DN23861_c7_g7; TRINITY_DN5844_c0_g1; TRINITY_DN9494_c0_g1	tetratricopeptide repeat protein 30A evidence Inferred from Electronic Annotation
1317	Smp_099850.3	21.53	7.79	1.35791	4.9222	TRINITY_DN10959_c0_g2; TRINITY_DN22116_c1_g2; TRINITY_DN22120_c0_g2; TRINITY_DN71937_c0_g1	divalent metal transporter DMT1B db_xref PMID:16267047 evidence Traceable Author Statemen
1318	Smp_068500.1	65.12	24.8	1.35772	6.50653	TRINITY_DN22874_c2_g1; TRINITY_DN22874_c2_g5	hypothetical protein evidence Inferred from Electronic Annotation
1320	Smp_169750.2	87.46	33.56	1.35592	6.93097	TRINITY_DN12850_c0_g1; TRINITY_DN13202_c0_g1; TRINITY_DN13202_c0_g2; TRINITY_DN13202_c0_g3; TRINITY_DN14785_c0_g5; TRINITY_DN22846_c0_g4; TRINITY_DN22846_c0_g5; TRINITY_DN22846_c0_g6; TRINITY_DN33098_c0_g1; TRINITY_DN33098_c0_g2; TRINITY_DN53451_c0_g1	dicer 1 with UniProtKB:B0EVY6 evidence Traceable Author Statemen
1321	Smp_127680.1	28.57	10.56	1.35499	5.32661	TRINITY_DN11453_c0_g1; TRINITY_DN11959_c0_g1; TRINITY_DN15720_c0_g3; TRINITY_DN19334_c0_g1	hypothetical protein evidence Inferred from Electronic Annotation
1322	Smp_021320.1	101.97	39.31	1.35301	7.15259	TRINITY_DN21169_c0_g5; TRINITY_DN21169_c0_g7	hypothetical protein evidence Inferred from Electronic Annotation
1324	Smp_153590.1	73.99	28.36	1.35285	6.69139	TRINITY_DN14745_c0_g1; TRINITY_DN22141_c0_g1; TRINITY_DN22141_c0_g2; TRINITY_DN5603_c0_g1	tubulin specific chaperone D evidence Inferred from Electronic Annotation
1329	Smp_118760.1	55.94	21.33	1.35046	6.29039	TRINITY_DN20346_c0_g1	hypothetical protein evidence Inferred from Electronic Annotation
1330	Smp_171500.1	21.39	7.79	1.34892	4.91552	TRINITY_DN17859_c0_g3; TRINITY_DN23763_c1_g4	hypothetical protein evidence Inferred from Electronic Annotation
1331	Smp_246440.1	58.18	22.27	1.34664	6.34784	TRINITY_DN18441_c0_g1; TRINITY_DN25989_c0_g1; TRINITY_DN4081_c1_g1	transmembrane protein 131 evidence Inferred from Electronic Annotation
1332	Smp_018400.1	48.78	18.6	1.34471	6.0955	TRINITY_DN21562_c0_g1	cytosolic iron sulfur protein assembly evidence Inferred from Electronic Annotation
1333	Smp_134380.1	16.99	6.09	1.34334	4.58976	TRINITY_DN21275_c0_g1	hypothetical protein evidence Inferred from Electronic Annotation
1334	Smp_149910.1	32.24	12.11	1.34225	5.50303	TRINITY_DN13341_c0_g1; TRINITY_DN55183_c0_g1; TRINITY_DN56713_c0_g1; TRINITY_DN8826_c0_g1	lar interacting protein (lip) protein evidence Inferred from Electronic Annotation
1336	Smp_199130.1	11.59	3.97	1.34096	4.04963	TRINITY_DN23909_c18_g2; TRINITY_DN63565_c0_g1	brca1 associated protein (brap2) evidence Inferred from Electronic Annotation
1339	Smp_018620.1	66.71	25.86	1.33391	6.54797	TRINITY_DN18855_c0_g1	paraplegin evidence Inferred from Electronic Annotation
1340	Smp_006860.2	39.84	15.21	1.3331	5.80864	TRINITY_DN21246_c0_g1	PDZ and LIM domain protein Zasp evidence Inferred from Electronic Annotation
1341	Smp_141710.1	45.53	17.47	1.33298	6	TRINITY_DN21413_c0_g1; TRINITY_DN21413_c0_g3; TRINITY_DN21413_c0_g5; TRINITY_DN21413_c0_g9; TRINITY_DN22651_c1_g12; TRINITY_DN22651_c1_g14; TRINITY_DN22651_c1_g2; TRINITY_DN22651_c1_g4; TRINITY_DN22651_c1_g7; TRINITY_DN35423_c0_g1; TRINITY_DN47696_c0_g1	kinetochore associated protein 1 evidence Inferred from Electronic Annotation
1342	Smp_005330.1	45.47	17.46	1.3319	5.99842	TRINITY_DN23433_c0_g1	methionine tRNA synthetase evidence Inferred from Electronic Annotation
1345	Smp_170290.1	23.65	8.81	1.32926	5.06437	TRINITY_DN21734_c0_g3; TRINITY_DN21734_c0_g4; TRINITY_DN41219_c0_g1; TRINITY_DN78_c0_g1	disks large 3 evidence Inferred from Electronic Annotation
1349	Smp_246570.1	23.32	8.7	1.32609	5.04527	TRINITY_DN21935_c2_g2	zinc finger-domain protein evidence Inferred from Electronic Annotation
1350	Smp_069160.1	199.49	79.04	1.32474	8.12686	TRINITY_DN18783_c0_g1; TRINITY_DN18783_c0_g2	peptidyl prolyl isomerase G evidence Inferred from Electronic Annotation
1351	Smp_026280.1	58.26	22.71	1.32156	6.35702	TRINITY_DN19789_c0_g1	hypothetical protein evidence Inferred from Electronic Annotation
1353	Smp_139970.1	1345.3	538.61	1.31901	10.8803	TRINITY_DN17366_c0_g1; TRINITY_DN68554_c0_g1	Calmodulin 4 (Calcium binding protein Dd112) evidence Inferred from Electronic Annotation
1354	Smp_131680.1	46.08	17.9	1.31673	6.02192	TRINITY_DN23037_c0_g2	hypothetical protein evidence Inferred from Electronic Annotation
1355	Smp_121990.1	21.87	8.19	1.31532	4.95699	TRINITY_DN13225_c0_g1; TRINITY_DN13225_c0_g2; TRINITY_DN13225_c0_g3; TRINITY_DN21909_c5_g1; TRINITY_DN23393_c1_g2; TRINITY_DN36363_c0_g1; TRINITY_DN41246_c0_g1; TRINITY_DN47736_c0_g1	glycerol 3 phosphate dehydrogenase evidence Inferred from Electronic Annotation
1356	Smp_245160.1	31.55	12.08	1.3153	5.47994	TRINITY_DN21386_c1_g1; TRINITY_DN4871_c0_g1; TRINITY_DN4871_c0_g2	oxalate:formate antiporter evidence Inferred from Electronic Annotation
1357	Smp_163210.1	54.73	21.4	1.31496	6.26922	TRINITY_DN12866_c0_g1; TRINITY_DN18504_c0_g4; TRINITY_DN22802_c0_g1	echinoderm microtubule associated protein evidence Inferred from Electronic Annotation
1358	Smp_213450.1	51.44	20.08	1.31479	6.18031	TRINITY_DN19616_c0_g1	uracil DNA glycosylase evidence Inferred from Electronic Annotation
1359	Smp_105090.1	20.17	7.52	1.3131	4.84248	TRINITY_DN12347_c0_g1; TRINITY_DN12347_c0_g2; TRINITY_DN12347_c0_g3; TRINITY_DN17903_c0_g1; TRINITY_DN349_c0_g1	Tr4/Tr2 (homologue) db_xref PMID:16839558 evidence Traceable Author Statemen
1362	Smp_143650.1	21.53	8.08	1.31108	4.93593	TRINITY_DN2635_c0_g1; TRINITY_DN28954_c0_g1; TRINITY_DN41794_c0_g1; TRINITY_DN6437_c0_g1	midasin evidence Inferred from Electronic Annotation
1365	Smp_090140.1	32.79	12.64	1.30875	5.53699	TRINITY_DN22247_c0_g2; TRINITY_DN22740_c0_g1	Ftz F1 interacting protein db_xref PMID:16574255 evidence Traceable Author Statemen
1366	Smp_146160.1	14.75	5.36	1.30825	4.39985	TRINITY_DN18889_c0_g2; TRINITY_DN19724_c10_g10; TRINITY_DN19724_c10_g9; TRINITY_DN23882_c0_g5; TRINITY_DN55485_c0_g1	Fanconi anemia group D2 protein evidence Inferred from Electronic Annotation
1367	Smp_075000.1	172.86	69.23	1.30777	7.92535	TRINITY_DN21069_c0_g1	E3 ubiquitin protein ligase HERC5 evidence Inferred from Electronic Annotation
1368	Smp_000170.1	43.81	17.15	1.30385	5.95327	TRINITY_DN23184_c0_g2	kv channel interacting protein 2 (KChIP2) evidence Inferred from Electronic Annotation
1369	Smp_031940.1	21.14	7.97	1.30348	4.91217	TRINITY_DN14612_c0_g1; TRINITY_DN21635_c0_g1	dual specificity mitogen activated protein evidence Inferred from Electronic Annotation
1370	Smp_069900.1	61.9	24.5	1.30256	6.44956	TRINITY_DN22661_c0_g1	ras protein Rab 39B evidence Inferred from Electronic Annotation
1371	Smp_165220.1	51.62	20.34	1.30205	6.18903	TRINITY_DN16598_c0_g1; TRINITY_DN16598_c0_g2; TRINITY_DN16598_c0_g3	polycomb protein EED evidence Inferred from Electronic Annotation
1372	Smp_128660.1	19.97	7.51	1.3011	4.83188	TRINITY_DN17028_c0_g2; TRINITY_DN594_c0_g1; TRINITY_DN594_c0_g2; TRINITY_DN9345_c0_g1; TRINITY_DN9345_c0_g2	protein SZT2 evidence Inferred from Electronic Annotation
1373	Smp_050080.1	81.94	32.66	1.30103	6.853	TRINITY_DN23485_c0_g3	2 hydroxyglutarate dehydrogenase evidence Inferred from Electronic Annotation
1377	Smp_052730.1	71.06	28.3	1.2983	6.64904	TRINITY_DN23896_c5_g13; TRINITY_DN23896_c5_g26; TRINITY_DN23896_c5_g30; TRINITY_DN23896_c5_g34; TRINITY_DN23896_c5_g5; TRINITY_DN23896_c5_g7; TRINITY_DN4921_c0_g1	sperm associated antigen 1 evidence Inferred from Electronic Annotation
1378	Smp_067280.1	101.56	40.81	1.29455	7.1636	TRINITY_DN10827_c0_g1; TRINITY_DN13647_c0_g2; TRINITY_DN17401_c0_g1; TRINITY_DN17401_c0_g2; TRINITY_DN24590_c0_g1	dynamin related protein dynamin protein like evidence Inferred from Electronic Annotation
1380	Smp_171520.1	77.29	30.95	1.29301	6.77136	TRINITY_DN20029_c0_g1; TRINITY_DN20789_c1_g1	hypothetical protein evidence Inferred from Electronic Annotation
1384	Smp_002600.1	54.17	21.69	1.28183	6.26416	TRINITY_DN23484_c0_g1; TRINITY_DN65779_c0_g1	Lysosomal Pro X carboxypeptidase evidence Inferred from Electronic Annotation
1385	Smp_169260.1	17.6	6.65	1.28177	4.65821	TRINITY_DN12998_c0_g1; TRINITY_DN19254_c1_g2; TRINITY_DN44756_c0_g1	zinc finger protein 362 evidence Inferred from Electronic Annotation
1386	Smp_172030.1	34.77	13.72	1.28097	5.62907	TRINITY_DN22692_c0_g1	DEAD box ATP dependent RNA helicase evidence Inferred from Electronic Annotation
1387	Smp_135080.1	24.99	9.7	1.28035	5.15745	TRINITY_DN13213_c0_g1; TRINITY_DN21252_c6_g1; TRINITY_DN21252_c6_g2; TRINITY_DN21252_c6_g3; TRINITY_DN22800_c0_g10; TRINITY_DN22800_c0_g12	microtubule associated protein 1A evidence Inferred from Electronic Annotation
1388	Smp_097830.1	53.66	21.51	1.27992	6.25115	TRINITY_DN20350_c0_g1; TRINITY_DN22124_c0_g2	hypothetical protein evidence Inferred from Electronic Annotation
1389	Smp_167220.1	7367.48	3036.51	1.27848	13.345	TRINITY_DN19847_c2_g3; TRINITY_DN19847_c2_g4; TRINITY_DN19847_c2_g6; TRINITY_DN20055_c0_g2; TRINITY_DN23882_c0_g22; TRINITY_DN23882_c0_g37; TRINITY_DN9102_c0_g1	translation initiation factor IF 2 evidence Inferred from Electronic Annotation
1391	Smp_028140.1	13.57	5.02	1.27517	4.29205	TRINITY_DN21538_c0_g3	FCH domain only protein 2 evidence Inferred from Electronic Annotation
1392	Smp_247600.1	13.37	4.94	1.27453	4.27128	TRINITY_DN17476_c0_g1	maternal embryonic leucine zipper kinase evidence Inferred from Electronic Annotation
1395	Smp_134250.1	11.54	4.19	1.27273	4.06437	TRINITY_DN17264_c0_g2; TRINITY_DN62525_c0_g1	heparan sulfate evidence Inferred from Electronic Annotation
1397	Smp_203130.1	16.8	6.38	1.27018	4.59574	TRINITY_DN14992_c0_g1	Actin 5C evidence Inferred from Electronic Annotation
1399	Smp_150970.1	14.99	5.65	1.26574	4.43563	TRINITY_DN18971_c1_g1; TRINITY_DN22458_c0_g1	RAB6 interacting protein 2 (ERC protein 1) evidence Inferred from Electronic Annotation
1400	Smp_016410.1	122.32	50.35	1.26397	7.4402	TRINITY_DN13376_c0_g1; TRINITY_DN13376_c0_g2; TRINITY_DN13376_c0_g3; TRINITY_DN23838_c0_g5	E3 SUMO protein ligase RanBP2 evidence Inferred from Electronic Annotation
1401	Smp_129240.1	26.28	10.37	1.26261	5.23458	TRINITY_DN22980_c0_g1	hypothetical protein evidence Inferred from Electronic Annotation
1402	Smp_126840.1	30.79	12.25	1.26258	5.46074	TRINITY_DN14951_c1_g2; TRINITY_DN20997_c0_g1	hypothetical protein evidence Inferred from Electronic Annotation
1403	Smp_194420.1	28.6	11.34	1.26225	5.35544	TRINITY_DN18170_c0_g1; TRINITY_DN19356_c0_g1; TRINITY_DN26454_c0_g1	hypothetical protein evidence Inferred from Electronic Annotation
1406	Smp_154040.1	48.57	19.69	1.26053	6.11395	TRINITY_DN18895_c0_g2	sugar nucleotide epimerase evidence Inferred from Electronic Annotation
1407	Smp_197540.1	27.08	10.73	1.25934	5.27836	TRINITY_DN23213_c0_g1	limb region 1 protein evidence Inferred from Electronic Annotation
1408	Smp_166780.1	27.27	10.81	1.25926	5.28836	TRINITY_DN20908_c0_g1; TRINITY_DN44613_c0_g1	calcineurin binding protein cabin 1 evidence Inferred from Electronic Annotation
1409	Smp_071970.1	78.68	32.3	1.2587	6.8071	TRINITY_DN19309_c0_g1; TRINITY_DN19309_c0_g2	chloride channel protein 3 evidence Inferred from Electronic Annotation
1411	Smp_040510.1	14.59	5.52	1.25768	4.39985	TRINITY_DN17252_c0_g1; TRINITY_DN19645_c0_g1; TRINITY_DN23856_c2_g4	alpha 1%2C6 mannosylglycoprotein evidence Inferred from Electronic Annotation
1412	Smp_135910.1	34.91	14.02	1.2575	5.64184	TRINITY_DN16288_c0_g1	DNA excision repair protein ERCC 6 evidence Inferred from Electronic Annotation
1414	Smp_030780.1	44.27	17.98	1.25408	5.98299	TRINITY_DN1050_c0_g1; TRINITY_DN17339_c0_g1; TRINITY_DN31394_c0_g1; TRINITY_DN48628_c0_g1; TRINITY_DN63113_c0_g1; TRINITY_DN68322_c0_g1	ubiquitin conjugation factor e4 a evidence Inferred from Electronic Annotation
1415	Smp_122910.1	20.8	8.15	1.25248	4.90448	TRINITY_DN10406_c0_g1; TRINITY_DN17172_c0_g2; TRINITY_DN25879_c0_g1	Serine:threonine protein kinase mTOR evidence Inferred from Electronic Annotation
1417	Smp_205470.1	20.34	7.97	1.25038	4.87332	TRINITY_DN5776_c0_g1	hypothetical protein evidence Inferred from Electronic Annotation
1420	Smp_244790.1	15.87	6.11	1.24654	4.52231	TRINITY_DN18790_c0_g1; TRINITY_DN23909_c18_g4; TRINITY_DN41183_c0_g1; TRINITY_DN55341_c0_g1; TRINITY_DN58042_c0_g1	intraflagellar transport protein 172 evidence Inferred from Electronic Annotation
1422	Smp_151100.1	44.5	18.18	1.24626	5.99277	TRINITY_DN22357_c0_g1; TRINITY_DN22357_c0_g3; TRINITY_DN23598_c0_g10; TRINITY_DN23598_c0_g2; TRINITY_DN23598_c0_g5; TRINITY_DN23598_c0_g6; TRINITY_DN23598_c0_g9; TRINITY_DN9463_c0_g1	cGMP dependent protein kinase evidence Inferred from Electronic Annotation
1424	Smp_203950.1	113.51	47.28	1.24598	7.33798	TRINITY_DN21101_c0_g1; TRINITY_DN21101_c1_g1	retinol dehydrogenase 11 evidence Inferred from Electronic Annotation
1425	Smp_052990.1	19.75	7.75	1.24576	4.83289	TRINITY_DN20287_c0_g3; TRINITY_DN20287_c0_g4; TRINITY_DN4559_c0_g1	globin X evidence Inferred from Electronic Annotation
1426	Smp_171860.1	10.99	4.06	1.24462	4.0045	TRINITY_DN68409_c0_g1; TRINITY_DN9294_c0_g1; TRINITY_DN9294_c0_g2	hypothetical protein evidence Inferred from Electronic Annotation
1427	Smp_163820.1	16.5	6.39	1.24371	4.57833	TRINITY_DN19405_c0_g1; TRINITY_DN19405_c0_g2; TRINITY_DN47420_c0_g1; TRINITY_DN56561_c0_g1; TRINITY_DN63349_c0_g1	phospholipid transporting ATPase IF evidence Inferred from Electronic Annotation
1428	Smp_048560.1	46.29	18.99	1.24226	6.0505	TRINITY_DN23493_c0_g2; TRINITY_DN27099_c0_g1	Four and a half LIM domains protein 2 evidence Inferred from Electronic Annotation
1430	Smp_013520.1	51.32	21.14	1.24071	6.19889	TRINITY_DN22153_c0_g1	hypothetical protein evidence Inferred from Electronic Annotation
1433	Smp_168760.1	30.89	12.5	1.24014	5.47216	TRINITY_DN20625_c0_g1; TRINITY_DN20625_c0_g2; TRINITY_DN20625_c0_g4	pyridine nucleotide disulfide oxidoreductase evidence Inferred from Electronic Annotation
1434	Smp_052140.1	28.16	11.35	1.23948	5.34021	TRINITY_DN22517_c0_g1	G patch domain and KOW motifs containing evidence Inferred from Electronic Annotation
1435	Smp_180740.1	12.67	4.79	1.23938	4.20633	TRINITY_DN20169_c3_g9; TRINITY_DN22975_c0_g1; TRINITY_DN22975_c0_g2	zinc finger FYVE domain containing protein 1 evidence Inferred from Electronic Annotation
1437	Smp_153700.1	18.07	7.09	1.23709	4.70929	TRINITY_DN22658_c0_g6; TRINITY_DN7204_c0_g1; TRINITY_DN7204_c0_g2	hypothetical protein evidence Inferred from Electronic Annotation
1438	Smp_055670.1	32.81	13.35	1.2364	5.55949	TRINITY_DN21018_c0_g1	ras protein Rab 4B evidence Inferred from Electronic Annotation
1439	Smp_140830.1	40.7	16.73	1.23385	5.86864	TRINITY_DN18131_c0_g1	telomerase cajal body protein 1 evidence Inferred from Electronic Annotation
1441	Smp_080700.3	48.21	19.93	1.23338	6.11145	TRINITY_DN15333_c0_g3; TRINITY_DN17807_c0_g1; TRINITY_DN22644_c0_g15; TRINITY_DN25057_c0_g1; TRINITY_DN4460_c0_g1	jnk:sapk associated protein evidence Inferred from Electronic Annotation
1443	Smp_095190.1	11.46	4.3	1.23324	4.06695	TRINITY_DN18829_c0_g1	Bcl 2 ous antagonist:killer evidence Inferred from Electronic Annotation
1444	Smp_086460.1	53.41	22.15	1.23286	6.25852	TRINITY_DN10683_c0_g1; TRINITY_DN15888_c0_g1; TRINITY_DN20002_c0_g2; TRINITY_DN30426_c0_g1; TRINITY_DN62083_c0_g1	tho complex subunit 2 evidence Inferred from Electronic Annotation
1446	Smp_068110.1	70.75	29.55	1.23181	6.66249	TRINITY_DN22591_c0_g1; TRINITY_DN22591_c0_g2	double strand break repair protein MRE11A evidence Inferred from Electronic Annotation
1447	Smp_208080.1	105.64	44.42	1.23135	7.23898	TRINITY_DN15620_c0_g1	beta ketothiolase ,term Acetyl-CoA acetyltransferase%2C cytosolic (ACAT2) ,term acetyl-CoA C-acyltransferase ,term acetyl-CoA C-acetyltransferase
1450	SjMEG-31_h7748_g1_i1	2876.83	1228.44	1.22698	12.0036	TRINITY_DN22410_c0_g1; TRINITY_DN22410_c0_g4; TRINITY_DN22410_c0_g5; TRINITY_DN22410_c0_g6	-
1452	Smp_130300.1	46.86	19.48	1.2246	6.07339	TRINITY_DN23871_c0_g2; TRINITY_DN23871_c0_g7	Na+:K+ ATPase alpha subunit evidence Inferred from Electronic Annotation
1453	Smp_139540.2	54.01	22.54	1.22458	6.27705	TRINITY_DN20507_c0_g1; TRINITY_DN32886_c0_g1; TRINITY_DN62265_c0_g1	hypothetical protein evidence Inferred from Electronic Annotation
1454	Smp_136510.1	26.7	10.86	1.22378	5.26903	TRINITY_DN20880_c0_g1; TRINITY_DN4852_c0_g1; TRINITY_DN4852_c0_g2	rab3 GTPase activating protein catalytic evidence Inferred from Electronic Annotation
1455	Smp_001180.1	40.95	16.97	1.22308	5.88069	TRINITY_DN22578_c0_g1; TRINITY_DN23664_c1_g1; TRINITY_DN58974_c0_g1	steroid receptor interacting snf2 domain evidence Inferred from Electronic Annotation
1456	Smp_212930.1	65.33	27.42	1.22275	6.55075	TRINITY_DN17186_c0_g1	cyclin h evidence Inferred from Electronic Annotation
1457	Smp_009550.1	67.43	28.33	1.22225	6.59634	TRINITY_DN16050_c0_g1; TRINITY_DN18723_c0_g1; TRINITY_DN23140_c3_g2; TRINITY_DN23140_c3_g3; TRINITY_DN34320_c0_g1	DNA mismatch repair protein Mlh1 evidence Inferred from Electronic Annotation
1458	Smp_073220.1	13.18	5.08	1.22171	4.26754	TRINITY_DN20878_c0_g1; TRINITY_DN56682_c0_g1	hypothetical protein evidence Inferred from Electronic Annotation
1460	Smp_079960.1	668.1	286.1	1.22067	9.89966	TRINITY_DN15214_c0_g1	Tubulin beta 2C chain evidence Inferred from Electronic Annotation
1462	Smp_171640.1	164.91	70.21	1.22025	7.88338	TRINITY_DN20945_c0_g1; TRINITY_DN20945_c0_g2; TRINITY_DN38023_c0_g1	epidermal growth factor receptor substrate 15 evidence Inferred from Electronic Annotation,term epidermal growth factor receptor substrate evidence Inferred from Electronic Annotation
1464	Smp_213110.1	16.58	6.55	1.21939	4.59276	TRINITY_DN18939_c0_g2; TRINITY_DN65206_c0_g1	zinc finger MYND domain containing protein 11 evidence Inferred from Electronic Annotation
1465	Smp_120920.3	28.61	11.72	1.21899	5.36912	TRINITY_DN10271_c0_g1; TRINITY_DN1087_c0_g1; TRINITY_DN13338_c0_g2; TRINITY_DN17333_c0_g4; TRINITY_DN22212_c4_g12; TRINITY_DN22212_c4_g4; TRINITY_DN28818_c0_g1; TRINITY_DN30271_c0_g1; TRINITY_DN34772_c0_g1; TRINITY_DN8650_c0_g1	hypothetical protein evidence Inferred from Electronic Annotation
1468	Smp_064020.4	13.38	5.18	1.21838	4.28983	TRINITY_DN15020_c0_g1	PAB dependent poly(A) specific ribonuclease evidence Inferred from Electronic Annotation
1469	Smp_083990.2	15.31	6.01	1.21827	4.48027	TRINITY_DN22251_c0_g2	cationic amino acid transporter evidence Inferred from Electronic Annotation
1470	Smp_168650.1	44.88	18.72	1.21821	6.01346	TRINITY_DN19242_c2_g1; TRINITY_DN68257_c0_g1; TRINITY_DN69406_c0_g1	microtubule actin cross linking factor 1 evidence Inferred from Electronic Annotation
1471	Smp_130000.1	15.65	6.16	1.21749	4.51159	TRINITY_DN42740_c0_g1; TRINITY_DN5966_c0_g1; TRINITY_DN5966_c0_g2	rab3 GTPase activating protein non catalytic evidence Inferred from Electronic Annotation
1473	Smp_058410.1	35.35	14.64	1.21671	5.67214	TRINITY_DN17959_c0_g1; TRINITY_DN17959_c0_g2	coiled coil domain containing protein 6 evidence Inferred from Electronic Annotation
1474	Smp_148830.1	20.7	8.34	1.2162	4.90881	TRINITY_DN18006_c0_g3; TRINITY_DN65177_c0_g1	hypothetical protein evidence Inferred from Electronic Annotation
1476	Smp_045760.1	33.55	13.89	1.21434	5.59813	TRINITY_DN19907_c0_g1; TRINITY_DN23886_c5_g2	tRNA (guanine N(1)) methyltransferase evidence Inferred from Electronic Annotation
1477	Smp_105910.1	31.99	13.22	1.21411	5.53013	TRINITY_DN17577_c0_g1; TRINITY_DN17876_c0_g1; TRINITY_DN29680_c0_g1	Histone Acetyltransferase%2C CBP/p300 family db_xref PMID:16427147 evidence Traceable Author Statemen
1478	Smp_142610.1	13.88	5.42	1.21273	4.34341	TRINITY_DN18306_c0_g1; TRINITY_DN68466_c0_g1	dual specificity tyrosine (Y) phosphorylation evidence Inferred from Electronic Annotation
1479	Smp_142210.1	74.25	31.47	1.21258	6.73769	TRINITY_DN23408_c0_g2; TRINITY_DN2556_c0_g1; TRINITY_DN2556_c0_g2; TRINITY_DN9313_c0_g1	vacuolar protein sorting associated protein 18 evidence Inferred from Electronic Annotation
1482	Smp_127490.1	32.44	13.46	1.20951	5.55152	TRINITY_DN14789_c0_g1; TRINITY_DN19816_c0_g4; TRINITY_DN23234_c0_g2	blooms syndrome DNA helicase evidence Inferred from Electronic Annotation
1484	Smp_144220.1	27.79	11.46	1.20826	5.33092	TRINITY_DN23016_c0_g1	glycine amidinotransferase evidence Inferred from Electronic Annotation
1485	Smp_034550.1	28.26	11.67	1.20751	5.35509	TRINITY_DN10809_c0_g1; TRINITY_DN19780_c0_g1	alpha actinin evidence Inferred from Electronic Annotation
1486	Smp_179800.1	41.42	17.4	1.20504	5.90256	TRINITY_DN13772_c0_g1; TRINITY_DN15407_c0_g1; TRINITY_DN20490_c0_g1; TRINITY_DN22768_c0_g2; TRINITY_DN34686_c0_g1	p21 activated protein kinase 1 Dpak1 evidence Inferred from Electronic Annotation
1487	Smp_012780.1	21.4	8.72	1.20447	4.95977	TRINITY_DN19047_c0_g1; TRINITY_DN23294_c0_g4; TRINITY_DN59610_c0_g1	sterile alpha and tir motif containing protein evidence Inferred from Electronic Annotation
1490	Smp_005280.1	11.95	4.64	1.19919	4.13668	TRINITY_DN22626_c0_g1	ubiquitin carboxyl terminal hydrolase 10 evidence Inferred from Electronic Annotation
1491	Smp_076530.1	27.46	11.41	1.19743	5.31723	TRINITY_DN23789_c0_g1; TRINITY_DN23882_c0_g18; TRINITY_DN23882_c0_g41	regulator of chromosome condensation evidence Inferred from Electronic Annotation
1494	Smp_024500.1	93.21	40.13	1.19569	7.06975	TRINITY_DN22631_c0_g1; TRINITY_DN66815_c1_g1	polymerase delta interacting protein 2 evidence Inferred from Electronic Annotation
1497	Smp_248220.1	11.41	4.43	1.19248	4.07382	TRINITY_DN18073_c0_g1; TRINITY_DN41865_c0_g1	pecanex protein 1 evidence Inferred from Electronic Annotation
1500	Smp_087220.1	30.35	12.77	1.18694	5.46336	TRINITY_DN12490_c0_g1; TRINITY_DN22314_c0_g1; TRINITY_DN40235_c0_g1	partner drosha db_xref PMID:19007911 evidence Traceable Author Statemen
1501	Smp_129010.1	13.5	5.37	1.18669	4.31252	TRINITY_DN18151_c0_g2	hypothetical protein evidence Inferred from Electronic Annotation
1502	Smp_065130.2	37.57	15.95	1.18619	5.76871	TRINITY_DN17179_c0_g1; TRINITY_DN17444_c0_g1; TRINITY_DN61591_c0_g1	gpi ethanolamine phosphate transferase 1 evidence Inferred from Electronic Annotation
1503	Smp_164760.1	14.12	5.65	1.18503	4.37643	TRINITY_DN13948_c0_g4; TRINITY_DN22018_c3_g1; TRINITY_DN273_c0_g1; TRINITY_DN273_c0_g2	cell adhesion molecule evidence Inferred from Electronic Annotation
1504	Smp_103140.1	604.32	265.23	1.18502	9.76578	TRINITY_DN22009_c0_g2	alpha tubulin evidence Inferred from Electronic Annotation
1505	Smp_007270.1	26.93	11.29	1.18433	5.29352	TRINITY_DN14691_c0_g1	smoothelin evidence Inferred from Electronic Annotation
1507	Smp_143050.1	68.41	29.55	1.18397	6.62877	TRINITY_DN20277_c0_g1	scaffold attachment factor b evidence Inferred from Electronic Annotation
1508	Smp_042210.1	14.89	6	1.18269	4.4522	TRINITY_DN22752_c0_g2	origin recognition complex subunit 4 evidence Inferred from Electronic Annotation
1510	Smp_049890.1	107.72	46.93	1.18162	7.28216	TRINITY_DN16557_c0_g1	WD repeat domain containing protein 83 evidence Inferred from Electronic Annotation
1511	Smp_015030.1	11.1	4.34	1.1801	4.03914	TRINITY_DN21196_c0_g1	ethanolamine kinase 1 evidence Inferred from Electronic Annotation
1512	Smp_070170.1	24.09	10.09	1.17785	5.13668	TRINITY_DN18197_c0_g1; TRINITY_DN18679_c1_g2; TRINITY_DN18679_c1_g6; TRINITY_DN7307_c1_g1; TRINITY_DN9475_c0_g3	mixed lineage leukemia protein mll evidence Inferred from Electronic Annotation
1513	Smp_143840.1	59.16	25.6	1.17738	6.42223	TRINITY_DN22777_c0_g1	glycogen phosphorylase evidence Inferred from Electronic Annotation
1514	Smp_149500.1	15.04	6.1	1.17578	4.46858	TRINITY_DN21389_c1_g3; TRINITY_DN50584_c0_g1; TRINITY_DN57079_c0_g1	eukaryotic elongation factor 2 kinase evidence Inferred from Electronic Annotation
1516	Smp_161350.1	21.85	9.13	1.17356	4.9991	TRINITY_DN21661_c0_g1; TRINITY_DN21661_c0_g2	succinate semialdehyde dehydrogenase evidence Inferred from Electronic Annotation
1517	Smp_144910.1	94.94	41.55	1.17297	7.10318	TRINITY_DN21315_c0_g1	collagen type I:II:III:V:XI alpha evidence Inferred from Electronic Annotation
1518	Smp_094570.1	53.63	23.24	1.1723	6.283	TRINITY_DN1574_c0_g1; TRINITY_DN1574_c0_g2; TRINITY_DN20204_c1_g5; TRINITY_DN20204_c1_g8; TRINITY_DN22647_c0_g2	WD repeat containing protein 75 evidence Inferred from Electronic Annotation
1521	Smp_077560.1	21.09	8.81	1.17107	4.94953	TRINITY_DN20406_c0_g1; TRINITY_DN22250_c3_g1; TRINITY_DN23794_c1_g2	Hippocampus abundant transcript 1 protein evidence Inferred from Electronic Annotation
1523	Smp_143750.1	34.34	14.74	1.16687	5.64616	TRINITY_DN21986_c0_g1; TRINITY_DN2754_c0_g1; TRINITY_DN2754_c0_g2; TRINITY_DN6020_c0_g1	transmembrane protein 63A evidence Inferred from Electronic Annotation
1524	Smp_136200.1	18.37	7.63	1.16639	4.75489	TRINITY_DN15996_c0_g1	hypothetical protein evidence Inferred from Electronic Annotation
1525	Smp_024520.1	42.83	18.54	1.16549	5.96278	TRINITY_DN22988_c0_g1	rab GDP dissociation inhibitor beta evidence Inferred from Electronic Annotation
1526	Smp_045790.1	22.4	9.44	1.16439	5.03738	TRINITY_DN22264_c0_g1	-
1527	Smp_163560.1	25.8	10.96	1.16402	5.23879	TRINITY_DN14241_c5_g1; TRINITY_DN20775_c0_g1; TRINITY_DN27391_c0_g1; TRINITY_DN66970_c0_g1	symplekin evidence Inferred from Electronic Annotation
1528	Smp_242110.1	41.33	17.9	1.16329	5.91241	TRINITY_DN19009_c0_g1; TRINITY_DN19009_c0_g2; TRINITY_DN8226_c1_g1	SAM domain and HD domain containing protein 1 evidence Inferred from Electronic Annotation
1529	Smp_154730.1	14.99	6.14	1.16317	4.46793	TRINITY_DN11111_c3_g1; TRINITY_DN31256_c0_g1; TRINITY_DN52710_c0_g1	rna binding protein musashi evidence Inferred from Electronic Annotation
1530	Smp_002960.1	97.51	43.05	1.16113	7.14527	TRINITY_DN21070_c1_g1; TRINITY_DN21070_c1_g18; TRINITY_DN22760_c0_g1; TRINITY_DN55703_c0_g1; TRINITY_DN57237_c0_g1	pelota evidence Inferred from Electronic Annotation
1531	Smp_154600.1	19.95	8.37	1.16083	4.87381	TRINITY_DN23865_c0_g7; TRINITY_DN26914_c0_g1	acetylcholinesterase evidence Inferred from Electronic Annotation
1532	Smp_244270.1	229.63	102.18	1.16042	8.37855	TRINITY_DN14019_c0_g1; TRINITY_DN16101_c0_g1; TRINITY_DN19306_c0_g1; TRINITY_DN19306_c0_g2; TRINITY_DN3157_c0_g1; TRINITY_DN45201_c0_g1; TRINITY_DN56981_c0_g1; TRINITY_DN9516_c0_g1; TRINITY_DN9516_c0_g2	serine:threonine protein kinase PAK 1 evidence Inferred from Electronic Annotation
1533	Smp_074050.1	23.13	9.8	1.1598	5.08449	TRINITY_DN21078_c0_g1; TRINITY_DN21078_c0_g2; TRINITY_DN6750_c0_g1	Scm with four mbt domains 1 evidence Inferred from Electronic Annotation
1534	Smp_158310.1	28.71	12.31	1.15844	5.393	TRINITY_DN17455_c0_g2; TRINITY_DN20318_c0_g1; TRINITY_DN52160_c0_g1; TRINITY_DN70988_c0_g1; TRINITY_DN7742_c0_g1; TRINITY_DN7742_c0_g2	ankyrin repeat and KH domain containing protein evidence Inferred from Electronic Annotation
1535	Smp_242680.1	102.25	45.26	1.1583	7.21442	TRINITY_DN23047_c0_g2; TRINITY_DN27232_c0_g1	protein FAM40A evidence Inferred from Electronic Annotation,term family with sequence similarity 40%2C member A evidence Inferred from Electronic Annotation
1537	Smp_128810.1	13.51	5.51	1.15632	4.32337	TRINITY_DN22003_c0_g1	GPI mannosyltransferase 1 evidence Inferred from Electronic Annotation
1538	Smp_027390.1	47.32	20.69	1.15559	6.10873	TRINITY_DN18811_c0_g1; TRINITY_DN20204_c1_g7; TRINITY_DN21540_c0_g6; TRINITY_DN5926_c0_g1	exocyst componenet sec exocyst complex component evidence Inferred from Electronic Annotation
1539	Smp_128950.1	28.7	12.34	1.1547	5.39369	TRINITY_DN14456_c0_g1; TRINITY_DN17336_c0_g1; TRINITY_DN18915_c0_g1; TRINITY_DN18915_c0_g2; TRINITY_DN8115_c0_g1	tankyrase 1 evidence Inferred from Electronic Annotation
1540	Smp_145600.1	12.2	4.93	1.15443	4.18031	TRINITY_DN18562_c0_g1; TRINITY_DN23867_c3_g5	PAP associated domain containing protein 5 evidence Inferred from Electronic Annotation
1541	Smp_131950.1	27.53	11.82	1.15408	5.3345	TRINITY_DN11839_c0_g1; TRINITY_DN17616_c0_g1; TRINITY_DN23885_c3_g5	exocyst complex component 2 evidence Inferred from Electronic Annotation
1542	Smp_045480.1	22.43	9.55	1.15111	5.04352	TRINITY_DN22879_c0_g1; TRINITY_DN46012_c0_g1; TRINITY_DN50492_c0_g1	protein numb evidence Inferred from Electronic Annotation
1544	Smp_161920.1	290.73	130.49	1.14968	8.72185	TRINITY_DN19033_c0_g1	actin evidence Inferred from Electronic Annotation
1545	Smp_181870.1	10.95	4.39	1.14865	4.03034	TRINITY_DN12748_c0_g1; TRINITY_DN20135_c0_g2; TRINITY_DN27231_c0_g1; TRINITY_DN9737_c0_g1	dna replication licensing factor mcm8 evidence Inferred from Electronic Annotation
1547	Smp_165190.1	63.86	28.27	1.14791	6.54117	TRINITY_DN23576_c0_g2; TRINITY_DN23576_c0_g6	hypothetical protein evidence Inferred from Electronic Annotation
1548	Smp_138500.1	11.76	4.76	1.14749	4.13093	TRINITY_DN17033_c0_g1; TRINITY_DN18497_c0_g1	ARF GTPase activating protein GIT2 evidence Inferred from Electronic Annotation
1551	Smp_164960.1	135.63	60.86	1.1432	7.62564	TRINITY_DN17844_c0_g1; TRINITY_DN17844_c0_g2; TRINITY_DN22017_c0_g2	phosphatidylinositol 4%2C5 bisphosphate 3 kinase evidence Inferred from Electronic Annotation
1552	Smp_137110.1	40.92	18.01	1.14088	5.90521	TRINITY_DN21301_c1_g4	hypothetical protein evidence Inferred from Electronic Annotation
1554	Smp_248160.1	63.18	28.11	1.14061	6.5281	TRINITY_DN18303_c0_g1; TRINITY_DN46464_c0_g1	lim domain binding protein evidence Inferred from Electronic Annotation
1555	Smp_180420.1	57.21	25.43	1.13909	6.38612	TRINITY_DN1194_c0_g1; TRINITY_DN20228_c0_g1; TRINITY_DN23678_c0_g1; TRINITY_DN71060_c0_g1	transcription elongation factor spt6 evidence Inferred from Electronic Annotation
1556	Smp_168850.1	19.09	8.14	1.13621	4.81916	TRINITY_DN14806_c0_g1; TRINITY_DN50793_c0_g1	metastasis associated protein mta metastasis associated protein (mta) evidence Inferred from Electronic Annotation
1557	Smp_057060.1	21.32	9.16	1.13544	4.97636	TRINITY_DN23148_c0_g3	hypothetical protein evidence Inferred from Electronic Annotation
1558	Smp_128960.1	40.86	18.12	1.13049	5.90641	TRINITY_DN15935_c0_g1; TRINITY_DN17461_c0_g1; TRINITY_DN40559_c0_g1	transcription initiation factor TFIID subunit 2 evidence Inferred from Electronic Annotation
1559	Smp_133270.1	14.25	5.98	1.12751	4.40803	TRINITY_DN16903_c0_g1; TRINITY_DN19744_c0_g1; TRINITY_DN23218_c3_g1; TRINITY_DN5180_c0_g1; TRINITY_DN5180_c0_g2	protein sel 1 1 evidence Inferred from Electronic Annotation
1561	Smp_009070.1	14.07	5.9	1.12701	4.39025	TRINITY_DN21352_c0_g1	zinc finger protein 182 evidence Inferred from Electronic Annotation
1562	Smp_076960.1	22.1	9.58	1.12655	5.03034	TRINITY_DN23724_c6_g1; TRINITY_DN5486_c0_g1; TRINITY_DN57568_c0_g1; TRINITY_DN68226_c0_g1	protein FAM102 evidence Inferred from Electronic Annotation
1564	Smp_163040.1	24.96	10.93	1.1217	5.20516	TRINITY_DN13963_c0_g2; TRINITY_DN18174_c0_g2; TRINITY_DN24814_c0_g1; TRINITY_DN56765_c0_g1; TRINITY_DN9009_c0_g1	nuclear pore complex protein Nup205 evidence Inferred from Electronic Annotation
1565	Smp_122800.1	69.7	31.52	1.12038	6.67553	TRINITY_DN17825_c0_g1; TRINITY_DN22075_c1_g1	lupus la ribonucleoprotein evidence Inferred from Electronic Annotation
1566	Smp_139410.1	26.12	11.49	1.11858	5.2709	TRINITY_DN21394_c1_g2; TRINITY_DN24491_c0_g1; TRINITY_DN41312_c0_g1; TRINITY_DN70424_c0_g1; TRINITY_DN7936_c0_g1	small conductance calcium activated potassium evidence Inferred from Electronic Annotation
1567	Smp_165620.1	11.27	4.66	1.11626	4.08151	TRINITY_DN11887_c0_g1; TRINITY_DN37469_c0_g1; TRINITY_DN38679_c0_g1; TRINITY_DN44052_c0_g1	dynein heavy chain evidence Inferred from Electronic Annotation
1568	Smp_155750.1	20.42	8.89	1.11492	4.92172	TRINITY_DN22204_c0_g2	bile acid beta glucosidase evidence Inferred from Electronic Annotation
1569	Smp_071150.1	19.61	8.52	1.11431	4.86443	TRINITY_DN10537_c0_g2; TRINITY_DN18023_c0_g1	thyroid hormone receptor interactor 10 evidence Inferred from Electronic Annotation
1570	Smp_129900.1	82.21	37.44	1.11415	6.91468	TRINITY_DN21028_c1_g1; TRINITY_DN21028_c1_g2; TRINITY_DN71949_c0_g1	sodium and chloride dependent GABA transporter evidence Inferred from Electronic Annotation
1571	Smp_133700.1	13.61	5.75	1.114	4.34767	TRINITY_DN15095_c1_g2; TRINITY_DN23560_c0_g3; TRINITY_DN33086_c0_g1	UDP glucose:glycoprotein glucosyltransferase 1 evidence Inferred from Electronic Annotation
1572	Smp_241470.1	18.88	8.2	1.11161	4.81147	TRINITY_DN15808_c1_g1; TRINITY_DN20392_c0_g2; TRINITY_DN23864_c10_g1; TRINITY_DN6016_c0_g1; TRINITY_DN62696_c0_g1; TRINITY_DN9346_c0_g2	putative tolloid 1 protein evidence Inferred from Sequence or Structural Similarity
1573	Smp_011980.1	67.97	30.93	1.11106	6.64241	TRINITY_DN22324_c0_g3	general transcription factor iih subunit 1 evidence Inferred from Electronic Annotation
1575	Smp_171740.1	39.4	17.71	1.11055	5.86071	TRINITY_DN15445_c0_g1; TRINITY_DN15445_c0_g2; TRINITY_DN15445_c0_g4; TRINITY_DN18496_c0_g1; TRINITY_DN18496_c0_g2; TRINITY_DN29744_c0_g1; TRINITY_DN8979_c0_g1; TRINITY_DN9093_c0_g1	multidrug resistance associated protein 1 db_xref PMID:20470831 evidence Traceable Author Statemen
1576	Smp_008340.1	11.89	4.97	1.11045	4.15866	TRINITY_DN14679_c1_g1; TRINITY_DN31332_c0_g1	5' nucleotidase domain containing 2 evidence Inferred from Electronic Annotation
1577	Smp_059880.1	95.51	43.71	1.11008	7.13155	TRINITY_DN17879_c0_g1; TRINITY_DN17879_c0_g2; TRINITY_DN35591_c0_g1	galactose 1 phosphate uridylyltransferase evidence Inferred from Electronic Annotation
1578	Smp_058980.2	89.53	40.98	1.10869	7.03903	TRINITY_DN19471_c0_g5; TRINITY_DN23666_c0_g13; TRINITY_DN23882_c0_g6	oxysterol binding protein 1 evidence Inferred from Electronic Annotation
1579	Smp_153140.1	16.73	7.23	1.10723	4.64155	TRINITY_DN11111_c0_g1; TRINITY_DN13214_c0_g1; TRINITY_DN32238_c0_g1; TRINITY_DN34363_c0_g1	dynein heavy chain evidence Inferred from Electronic Annotation
1580	Smp_158900.1	54.32	24.7	1.10603	6.32229	TRINITY_DN15074_c0_g1; TRINITY_DN18035_c0_g1; TRINITY_DN19880_c0_g4	hypothetical protein evidence Inferred from Electronic Annotation
1581	Smp_147620.1	24.35	10.78	1.10565	5.17513	TRINITY_DN12496_c0_g1	hypothetical protein evidence Inferred from Electronic Annotation
1585	Smp_083650.1	17.19	7.47	1.10271	4.68145	TRINITY_DN17141_c0_g3	cystathionine gamma lyase evidence Inferred from Electronic Annotation
1586	Smp_169520.1	17.84	7.78	1.10151	4.73444	TRINITY_DN19279_c0_g1; TRINITY_DN34497_c0_g1	integrator complex subunit evidence Inferred from Electronic Annotation
1587	Smp_161580.1	89.32	41.11	1.10088	7.03815	TRINITY_DN21369_c2_g3	ring finger protein 121 evidence Inferred from Electronic Annotation
1588	Smp_154580.1	11.33	4.75	1.10054	4.09424	TRINITY_DN15899_c0_g1; TRINITY_DN15899_c0_g2; TRINITY_DN15899_c0_g3; TRINITY_DN2794_c0_g1	Rab3 evidence Inferred from Electronic Annotation
1589	Smp_142710.1	34.31	15.47	1.10024	5.66619	TRINITY_DN10906_c0_g1; TRINITY_DN21497_c0_g1; TRINITY_DN8157_c0_g1	serine:threonine protein kinase SMG1 evidence Inferred from Electronic Annotation
1590	Smp_150700.1	19.86	8.73	1.10023	4.88704	TRINITY_DN50690_c0_g1; TRINITY_DN8789_c0_g1	aldo keto reductase family 1%2C member B4 evidence Inferred from Electronic Annotation
1591	Smp_057090.1	18.31	8.01	1.09975	4.77189	TRINITY_DN11422_c0_g2; TRINITY_DN19633_c0_g2; TRINITY_DN3951_c0_g1	radial spoke head protein 4 A evidence Inferred from Electronic Annotation
1592	Smp_092020.1	47.82	21.78	1.0997	6.1416	TRINITY_DN15120_c0_g1; TRINITY_DN20125_c0_g1; TRINITY_DN23488_c1_g1; TRINITY_DN45032_c0_g1	cement protein 3B variant 2 evidence Inferred from Electronic Annotation
1593	Smp_156100.1	16.53	7.18	1.09965	4.62702	TRINITY_DN16890_c0_g1; TRINITY_DN20023_c2_g1	protein wntless evidence Inferred from Electronic Annotation,term integral membrane protein gpr177 evidence Inferred from Electronic Annotation
1594	Smp_129990.1	18.82	8.25	1.09943	4.81096	TRINITY_DN13765_c0_g3; TRINITY_DN22377_c0_g1; TRINITY_DN8312_c0_g1	GTPase activating protein and VPS9 evidence Inferred from Electronic Annotation
1597	Smp_126490.1	49.21	22.5	1.09531	6.18408	TRINITY_DN23674_c0_g2; TRINITY_DN23763_c1_g1	Lon protease protein%2C mitochondrial evidence Inferred from Electronic Annotation
1599	Smp_035210.1	12.17	5.17	1.09391	4.19692	TRINITY_DN15572_c0_g1	multivalent antigen sj97 GAPDH evidence Inferred from Electronic Annotation
1601	Smp_000110.1	24.57	10.99	1.09262	5.19219	TRINITY_DN13259_c0_g1; TRINITY_DN13259_c0_g2; TRINITY_DN20056_c0_g1	elongation factor Tu GTP binding evidence Inferred from Electronic Annotation
1602	Smp_051280.1	18.88	8.33	1.09137	4.81813	TRINITY_DN22420_c0_g3	smg 7%2C nonsense mediated mRNA decay evidence Inferred from Electronic Annotation
1606	Smp_032490.1	19.85	8.79	1.09067	4.88947	TRINITY_DN22682_c0_g1; TRINITY_DN45632_c0_g1	tropomyosin evidence Inferred from Electronic Annotation
1607	Smp_130660.1	17.4	7.64	1.0906	4.70266	TRINITY_DN14959_c0_g1; TRINITY_DN21695_c0_g1; TRINITY_DN2436_c0_g1; TRINITY_DN45326_c0_g1	ank repeat containing evidence Inferred from Electronic Annotation
1609	Smp_074400.1	21.16	9.44	1.08584	4.98185	TRINITY_DN22273_c0_g3	ubiquitin specific peptidase 22 (C19 family) evidence Inferred from Electronic Annotation
1610	Smp_161140.1	11.47	4.88	1.08457	4.11686	TRINITY_DN56911_c0_g1; TRINITY_DN61270_c0_g1; TRINITY_DN7940_c0_g1; TRINITY_DN7940_c0_g2	potassium voltage gated channel subfamily H evidence Inferred from Electronic Annotation
1614	Smp_148400.1	40.4	18.54	1.0832	5.90545	TRINITY_DN15324_c0_g3; TRINITY_DN19262_c0_g1; TRINITY_DN23139_c0_g1	calmodulin binding transcription activator 2 evidence Inferred from Electronic Annotation
1615	Smp_245610.1	58.43	27.07	1.08216	6.43463	TRINITY_DN13456_c0_g1; TRINITY_DN13456_c0_g2; TRINITY_DN13456_c0_g3; TRINITY_DN13456_c0_g4; TRINITY_DN13456_c0_g5; TRINITY_DN15375_c0_g1	hypothetical protein evidence Inferred from Electronic Annotation
1616	Smp_172190.2	75.21	35	1.08198	6.79714	TRINITY_DN18532_c0_g1; TRINITY_DN4045_c1_g1; TRINITY_DN49796_c0_g1	methyltransferase protein 14 like evidence Inferred from Electronic Annotation
1617	Smp_019980.1	159.69	74.91	1.08192	7.8802	TRINITY_DN16096_c0_g7; TRINITY_DN19346_c0_g1; TRINITY_DN20213_c0_g5; TRINITY_DN22765_c1_g2; TRINITY_DN4105_c0_g1; TRINITY_DN62019_c0_g1	vacuole membrane protein 1 evidence Inferred from Electronic Annotation
1618	Smp_125290.1	602.77	284.23	1.08187	9.79442	TRINITY_DN19657_c0_g1; TRINITY_DN19657_c0_g2; TRINITY_DN30174_c0_g1; TRINITY_DN8988_c0_g1; TRINITY_DN8988_c0_g2; TRINITY_DN9547_c0_g1	c myc promoter binding protein evidence Inferred from Electronic Annotation
1619	Smp_132350.1	71.1	33.14	1.07854	6.71754	TRINITY_DN22350_c0_g3; TRINITY_DN23886_c7_g5	nucleolar complex protein 3 evidence Inferred from Electronic Annotation
1620	Smp_085380.1	15.81	6.96	1.07848	4.57107	TRINITY_DN21510_c0_g1; TRINITY_DN36053_c0_g1	kelch ECH associated protein 1 like evidence Inferred from Sequence or Structural Similarity
1622	Smp_005190.2	35.32	16.22	1.07668	5.71534	TRINITY_DN14673_c0_g1; TRINITY_DN22018_c3_g2; TRINITY_DN41169_c0_g1; TRINITY_DN8026_c0_g1	mitogen activated protein kinase kinase kinase evidence Inferred from Electronic Annotation
1623	Smp_176690.1	35.52	16.33	1.07542	5.72383	TRINITY_DN10085_c1_g1; TRINITY_DN20191_c0_g1; TRINITY_DN20191_c0_g3; TRINITY_DN20204_c0_g1	ral guanine nucleotide exchange factor with pH evidence Inferred from Electronic Annotation
1624	Smp_127920.1	14.01	6.13	1.07395	4.4019	TRINITY_DN16975_c0_g1; TRINITY_DN16975_c0_g2; TRINITY_DN20096_c0_g1	serine:threonine protein kinase 11 evidence Inferred from Electronic Annotation
1625	Smp_024110.1	2458.81	1168.88	1.07219	11.8252	TRINITY_DN20353_c0_g4	enolase db_xref PMID:7665603 evidence Traceable Author Statemen
1626	Smp_166200.1	64.83	30.33	1.0712	6.58736	TRINITY_DN13063_c0_g1; TRINITY_DN13993_c0_g3; TRINITY_DN23352_c0_g1; TRINITY_DN23613_c0_g16; TRINITY_DN23856_c2_g7; TRINITY_DN37517_c0_g1	axin 1 evidence Inferred from Electronic Annotation
1628	Smp_164020.1	27.29	12.48	1.06947	5.34944	TRINITY_DN17427_c0_g1; TRINITY_DN50037_c0_g1	phosphatase and actin regulator 3 evidence Inferred from Electronic Annotation
1629	Smp_162310.1	54.63	25.53	1.06824	6.3427	TRINITY_DN23767_c0_g1	serrate RNA effector molecule evidence Inferred from Electronic Annotation
1630	Smp_173940.1	24.24	11.05	1.06668	5.1815	TRINITY_DN21578_c0_g2; TRINITY_DN9225_c0_g1; TRINITY_DN9225_c0_g2	frizzled-like protein with UniProtKB:A0A075FFK0 evidence Traceable Author Statemen
1632	Smp_205760.1	369.3	175.97	1.06519	9.09347	TRINITY_DN22321_c0_g2	Guanine nucleotide-binding protein subunit gamma with UniProtKB:Q8IT61 evidence Non-traceable Author Statemen
1633	Smp_180190.1	55.05	25.79	1.06502	6.35473	TRINITY_DN17857_c0_g2; TRINITY_DN17857_c0_g3	hypothetical protein evidence Inferred from Electronic Annotation
1634	Smp_167690.1	40.3	18.74	1.06502	5.90785	TRINITY_DN1697_c0_g1; TRINITY_DN20850_c0_g1; TRINITY_DN23867_c2_g1; TRINITY_DN23867_c2_g2; TRINITY_DN23867_c2_g3; TRINITY_DN32300_c0_g1	E3 ubiquitin protein ligase HUWE1 evidence Inferred from Electronic Annotation
1635	Smp_213520.1	18.35	8.25	1.06481	4.7866	TRINITY_DN21575_c0_g1	hypothetical protein evidence Inferred from Electronic Annotation
1636	Smp_161170.1	86.04	40.61	1.06475	6.99605	TRINITY_DN23362_c0_g2; TRINITY_DN7139_c0_g1	RNA polymerase associated protein RTF1 evidence Inferred from Electronic Annotation
1638	Smp_129500.1	118.07	55.96	1.06379	7.45146	TRINITY_DN19495_c0_g1; TRINITY_DN21756_c0_g1; TRINITY_DN21756_c0_g2	dna directed rna polymerase i largest evidence Inferred from Electronic Annotation
1639	Smp_100070.1	62.11	29.24	1.06141	6.52904	TRINITY_DN23158_c0_g1	RWD domain containing protein 2B evidence Inferred from Electronic Annotation
1640	Smp_150470.1	36.77	17.1	1.06125	5.77795	TRINITY_DN19576_c0_g1; TRINITY_DN57186_c0_g1; TRINITY_DN5808_c0_g1	hypothetical protein evidence Inferred from Electronic Annotation
1641	Smp_015710.1	39.81	18.56	1.06102	5.89166	TRINITY_DN17628_c0_g4; TRINITY_DN17628_c0_g5; TRINITY_DN17779_c0_g1	6 phosphofructo 2 kinase:fructose 2 evidence Inferred from Electronic Annotation
1642	Smp_068060.1	31.78	14.72	1.06021	5.56986	TRINITY_DN22176_c1_g1; TRINITY_DN40735_c0_g1; TRINITY_DN8151_c0_g1; TRINITY_DN8151_c0_g2	serine:threonine protein kinase evidence Inferred from Electronic Annotation
1643	Smp_047410.1	14.7	6.53	1.06004	4.47444	TRINITY_DN19989_c0_g1	hypothetical protein evidence Inferred from Electronic Annotation
1644	Smp_156720.1	11.32	4.91	1.05977	4.10685	TRINITY_DN16470_c0_g1; TRINITY_DN488_c0_g2	tetratricopeptide repeat evidence Inferred from Electronic Annotation
1645	Smp_247430.1	11.15	4.83	1.05939	4.08576	TRINITY_DN15828_c0_g1; TRINITY_DN19638_c0_g7; TRINITY_DN25765_c0_g1	cadherin domain containing protein with InterPro:IPR002126 evidence Inferred from Sequence Model
1647	Smp_009400.1	41.6	19.46	1.05805	5.95559	TRINITY_DN23202_c0_g1; TRINITY_DN29437_c1_g1	Serine:arginine repetitive matrix protein 2 evidence Inferred from Electronic Annotation
1648	Smp_171780.1	74.75	35.4	1.05731	6.79636	TRINITY_DN10037_c0_g1; TRINITY_DN20343_c0_g1; TRINITY_DN23019_c6_g9	SPARC protein evidence Inferred from Electronic Annotation
1651	Smp_013790.1	70.35	33.32	1.05586	6.7097	TRINITY_DN20141_c0_g1	ATP dependent RNA helicase DDX5 evidence Inferred from Electronic Annotation
1652	Smp_160730.1	60.6	28.65	1.0549	6.49586	TRINITY_DN17238_c0_g1; TRINITY_DN43963_c0_g1	zinc finger protein evidence Inferred from Electronic Annotation
1653	Smp_147230.1	11.57	5.06	1.05259	4.13996	TRINITY_DN16169_c0_g1; TRINITY_DN57092_c0_g1; TRINITY_DN62121_c0_g1	ATP dependent DNA helicase PIF1 evidence Inferred from Electronic Annotation
1654	Smp_173030.1	29.15	13.54	1.05213	5.44923	TRINITY_DN21815_c1_g1; TRINITY_DN71398_c0_g1	aminopeptidase A (M01 family) evidence Inferred from Electronic Annotation
1655	Smp_168660.1	52.84	25	1.05017	6.30086	TRINITY_DN13677_c1_g1; TRINITY_DN21213_c6_g14; TRINITY_DN22773_c0_g1; TRINITY_DN23765_c2_g4; TRINITY_DN29041_c0_g1	general vesicular transport factor p115 evidence Inferred from Electronic Annotation
1656	Smp_020120.1	136.55	65.45	1.04962	7.66534	TRINITY_DN20425_c0_g1	transmembrane protein 188 evidence Inferred from Electronic Annotation
1657	Smp_027450.1	21.17	9.72	1.0483	4.99503	TRINITY_DN22343_c0_g6	protein misato evidence Inferred from Electronic Annotation
1658	Smp_150360.1	56.66	26.95	1.04472	6.40276	TRINITY_DN14967_c0_g1; TRINITY_DN22558_c0_g1; TRINITY_DN33609_c0_g1; TRINITY_DN5522_c0_g1; TRINITY_DN60585_c0_g1; TRINITY_DN9036_c0_g1	ubiquitin protein ligase edd evidence Inferred from Electronic Annotation
1660	Smp_065810.1	28.03	13.09	1.04287	5.39643	TRINITY_DN21508_c0_g1; TRINITY_DN61352_c0_g1	YY1AP protein1 evidence Inferred from Electronic Annotation
1662	Smp_093690.2	85.19	40.88	1.04126	6.98948	TRINITY_DN22775_c0_g1	DEAD box ATP dependent RNA helicase evidence Inferred from Electronic Annotation
1663	Smp_147630.1	82.11	39.41	1.04031	6.93687	TRINITY_DN22586_c0_g2	poly(ADP ribose) glycohydrolase ARH3 evidence Inferred from Electronic Annotation
1664	Smp_152870.1	24.09	11.2	1.04023	5.1815	TRINITY_DN20293_c0_g1	hypothetical protein evidence Inferred from Electronic Annotation
1665	Smp_242450.1	41.6	19.72	1.03983	5.96162	TRINITY_DN19738_c0_g2	abhydrolase domain containing protein 4 evidence Inferred from Electronic Annotation
1667	Smp_149210.1	17.17	7.84	1.03944	4.70099	TRINITY_DN16752_c0_g1; TRINITY_DN21909_c3_g2; TRINITY_DN22828_c0_g2; TRINITY_DN50864_c0_g1	hypothetical protein evidence Inferred from Electronic Annotation
1668	Smp_244820.1	15.23	6.91	1.03691	4.53232	TRINITY_DN23475_c0_g1; TRINITY_DN23475_c0_g5; TRINITY_DN8504_c0_g1	calpain 7 protein evidence Inferred from Electronic Annotation
1669	Smp_171200.1	34.22	16.17	1.0365	5.68342	TRINITY_DN15982_c0_g1; TRINITY_DN21252_c7_g9; TRINITY_DN21571_c0_g2; TRINITY_DN67075_c0_g1	WD repeat containing protein 44 evidence Inferred from Electronic Annotation
1670	Smp_000230.1	11.08	4.89	1.03628	4.08491	TRINITY_DN15639_c0_g1	GDNF inducible zinc finger protein 1 evidence Inferred from Electronic Annotation
1671	Smp_079800.1	31.31	14.8	1.03206	5.55796	TRINITY_DN17791_c0_g1; TRINITY_DN2668_c0_g1; TRINITY_DN59063_c0_g1	TBC1 domain family 4 evidence Inferred from Electronic Annotation
1672	Smp_150850.1	40.89	19.49	1.03169	5.9397	TRINITY_DN23428_c0_g2; TRINITY_DN23428_c0_g3	histone lysine n methyltransferase setb1 evidence Inferred from Electronic Annotation
1673	Smp_006700.1	33.42	15.84	1.03135	5.65134	TRINITY_DN17522_c0_g1; TRINITY_DN22064_c0_g2; TRINITY_DN24101_c0_g1	zinc finger protein 106 evidence Inferred from Electronic Annotation
1674	Smp_063090.1	383.25	187	1.03131	9.15798	TRINITY_DN23796_c0_g1; TRINITY_DN23796_c0_g10; TRINITY_DN23796_c0_g11; TRINITY_DN23796_c0_g13; TRINITY_DN23796_c0_g14; TRINITY_DN23796_c0_g16; TRINITY_DN23796_c0_g17; TRINITY_DN23796_c0_g18; TRINITY_DN23796_c0_g19; TRINITY_DN23796_c0_g2; TRINITY_DN23796_c0_g20; TRINITY_DN23796_c0_g21; TRINITY_DN23796_c0_g3; TRINITY_DN23796_c0_g5; TRINITY_DN23796_c0_g7; TRINITY_DN23796_c0_g8; TRINITY_DN23796_c0_g9…	aconitate hydratase%2C mitochondrial evidence Inferred from Electronic Annotation
1676	Smp_154470.1	25.51	11.98	1.03025	5.26641	TRINITY_DN22588_c0_g1	phosphatase and tensin A evidence Inferred from Electronic Annotation
1677	Smp_212080.1	16.25	7.45	1.02957	4.62644	TRINITY_DN22947_c0_g1	guanine nucleotide exchange evidence Inferred from Electronic Annotation
1679	Smp_156540.1	14.42	6.56	1.02834	4.45812	TRINITY_DN10350_c0_g1; TRINITY_DN18738_c0_g1; TRINITY_DN18738_c0_g2; TRINITY_DN3521_c0_g1; TRINITY_DN3521_c0_g2	wnt family member wnt evidence Inferred from Electronic Annotation
1681	Smp_146730.1	11.31	5.06	1.02244	4.11853	TRINITY_DN19966_c0_g1; TRINITY_DN8692_c0_g1	a disintegrin and metalloproteinase with evidence Inferred from Electronic Annotation
1682	Smp_150740.1	21.06	9.86	1.02241	4.99639	TRINITY_DN21075_c1_g1	asparagine rich antigen evidence Inferred from Electronic Annotation
1683	Smp_144570.1	29.21	13.88	1.02165	5.46238	TRINITY_DN21474_c0_g1	serine hydroxymethyltransferase evidence Inferred from Electronic Annotation
1684	Smp_035280.1	31.24	14.88	1.02164	5.55827	TRINITY_DN19833_c0_g2; TRINITY_DN19833_c0_g4	hypothetical protein evidence Inferred from Electronic Annotation
1686	Smp_163380.1	37.38	17.92	1.02044	5.81506	TRINITY_DN20253_c0_g1; TRINITY_DN20253_c0_g3	cyclin dependent kinase 2 evidence Inferred from Electronic Annotation
1687	Smp_051390.1	147.23	72.1	1.01989	7.78352	TRINITY_DN17747_c0_g1	nif3 protein 1 evidence Inferred from Electronic Annotation
1690	Smp_245800.1	27.38	13.03	1.01636	5.37191	TRINITY_DN23775_c1_g1; TRINITY_DN23775_c1_g2; TRINITY_DN2478_c0_g1; TRINITY_DN28987_c0_g1; TRINITY_DN40810_c0_g1; TRINITY_DN48851_c0_g1; TRINITY_DN72628_c0_g1	hook protein with InterPro:IPR008636 evidence Inferred from Sequence Model
1694	Smp_133660.1	20.91	9.85	1.01389	4.98914	TRINITY_DN20169_c3_g10; TRINITY_DN20169_c3_g14	protein lin 9 evidence Inferred from Electronic Annotation
1695	Smp_001390.1	15.07	6.96	1.01353	4.52544	TRINITY_DN21754_c2_g10; TRINITY_DN21754_c2_g15; TRINITY_DN50351_c0_g1	nck associated protein 1 evidence Inferred from Electronic Annotation
1696	Smp_141680.1	17.43	8.14	1.01179	4.73173	TRINITY_DN20071_c0_g1; TRINITY_DN20071_c0_g3	fasciclin domain containing protein evidence Inferred from Electronic Annotation
1697	Smp_174890.1	25.77	12.28	1.01136	5.28725	TRINITY_DN18432_c0_g1; TRINITY_DN7358_c1_g1	tata box binding evidence Inferred from Electronic Annotation
1698	Smp_127460.1	10.99	4.95	1.01087	4.08236	TRINITY_DN23004_c0_g2	hypothetical protein evidence Inferred from Electronic Annotation
1699	Smp_212450.1	103.88	51.09	1.00966	7.28512	TRINITY_DN22071_c0_g3	placental protein 11 evidence Inferred from Electronic Annotation
1700	Smp_012900.1	85.23	41.83	1.00957	7.00068	TRINITY_DN21165_c0_g1; TRINITY_DN21342_c2_g1; TRINITY_DN70189_c0_g1	poly(U) binding splicing factor PUF60 evidence Inferred from Electronic Annotation
1701	Smp_162910.1	40.17	19.49	1.00667	5.92267	TRINITY_DN22765_c4_g3; TRINITY_DN37654_c0_g1; TRINITY_DN5535_c0_g2; TRINITY_DN63613_c0_g1	related to multifunctional cyclin dependent evidence Inferred from Electronic Annotation,term glycerophosphocholine phosphodiesterase GDE1 evidence Inferred from Electronic Annotation
1705	Smp_173550.1	138.31	68.52	1.0028	7.69926	TRINITY_DN16704_c0_g1; TRINITY_DN2317_c1_g1	myo inositol monophosphatase evidence Inferred from Electronic Annotation,term inositol monophosphatase 3 evidence Inferred from Electronic Annotation
1706	Smp_070680.1	26.64	12.84	0.997914	5.33914	TRINITY_DN22979_c0_g4	repressor of RNA polymerase III transcription evidence Inferred from Electronic Annotation
1708	Smp_059690.2	56.96	28.04	0.997016	6.42626	TRINITY_DN21795_c0_g1; TRINITY_DN21795_c0_g2	NF kappa B inhibitor interacting Ras evidence Inferred from Electronic Annotation
1710	Smp_049920.3	59.44	29.36	0.993332	6.48864	TRINITY_DN17871_c0_g1; TRINITY_DN18020_c0_g1; TRINITY_DN27768_c0_g1; TRINITY_DN35733_c0_g1; TRINITY_DN35733_c0_g2; TRINITY_DN39212_c0_g1; TRINITY_DN49877_c0_g1; TRINITY_DN62694_c0_g1; TRINITY_DN72176_c0_g1	importin 9 (imp9) (ran binding protein evidence Inferred from Electronic Annotation
1711	Smp_213400.1	156.78	78.28	0.992885	7.88301	TRINITY_DN20121_c0_g1; TRINITY_DN20121_c0_g2; TRINITY_DN20121_c0_g3; TRINITY_DN20121_c0_g4; TRINITY_DN20121_c0_g5; TRINITY_DN20121_c0_g6; TRINITY_DN20121_c0_g7; TRINITY_DN20121_c0_g8; TRINITY_DN20368_c0_g1	e3 ubiquitin-protein ligase bre1 evidence Inferred from Electronic Annotation
1713	Smp_087920.1	52.14	25.71	0.992418	6.30104	TRINITY_DN22045_c0_g1; TRINITY_DN22045_c0_g2; TRINITY_DN22045_c0_g3	NEDD8 activating enzyme E1 regulatory subunit evidence Inferred from Electronic Annotation
1714	Smp_144330.1	36.64	17.93	0.991592	5.79623	TRINITY_DN22214_c0_g1	early endosome antigen 1 evidence Inferred from Electronic Annotation
1715	Smp_049730.2	17.37	8.24	0.991387	4.7339	TRINITY_DN18711_c0_g3	metastasis associated protein 1 (mta1) evidence Inferred from Electronic Annotation
1717	Smp_241840.1	20.37	9.77	0.988569	4.9607	TRINITY_DN23356_c0_g1	choline:ethanolamine kinase evidence Inferred from Electronic Annotation
1719	Smp_158100.2	32.14	15.72	0.986999	5.61058	TRINITY_DN1073_c0_g1; TRINITY_DN15160_c0_g1; TRINITY_DN3645_c0_g1; TRINITY_DN3645_c0_g2; TRINITY_DN59481_c0_g1; TRINITY_DN64852_c0_g1; TRINITY_DN67782_c0_g1; TRINITY_DN9223_c0_g1	hypothetical protein evidence Inferred from Electronic Annotation
1720	Smp_167330.1	45.61	22.54	0.985525	6.11166	TRINITY_DN22159_c0_g2; TRINITY_DN22159_c0_g3	succinyl coenzyme A ligase (ADP forming) subunit beta evidence Inferred from Electronic Annotation
1723	Smp_076520.1	12.5	5.82	0.985116	4.27202	TRINITY_DN21847_c0_g1	transmembrane protein 184A evidence Inferred from Electronic Annotation
1724	Smp_132740.1	28.32	13.82	0.98434	5.43095	TRINITY_DN21977_c0_g1	fatty acid desaturase 2 evidence Inferred from Electronic Annotation
1725	Smp_122830.1	34.07	16.74	0.983231	5.69516	TRINITY_DN10482_c0_g1; TRINITY_DN22225_c0_g1; TRINITY_DN35908_c0_g1	Ataxin 2%2C N terminal%2Cdomain containing protein evidence Inferred from Electronic Annotation
1726	Smp_192110.1	20.47	9.87	0.98197	4.96993	TRINITY_DN13493_c0_g1; TRINITY_DN19040_c0_g1; TRINITY_DN38628_c0_g1	Tubulin beta 2C chain evidence Inferred from Electronic Annotation
1727	Smp_061300.1	299.04	150.91	0.981938	8.81682	TRINITY_DN18835_c0_g1; TRINITY_DN18835_c0_g2; TRINITY_DN23124_c1_g10; TRINITY_DN23124_c1_g11; TRINITY_DN23124_c1_g13; TRINITY_DN23124_c1_g15; TRINITY_DN23124_c1_g18; TRINITY_DN23124_c1_g20; TRINITY_DN23124_c1_g21; TRINITY_DN23124_c1_g24; TRINITY_DN23124_c1_g28; TRINITY_DN23124_c1_g3	transcription initiation factor tfiid subunit 6 evidence Inferred from Electronic Annotation
1728	Smp_176370.1	20.64	9.96	0.981453	4.98185	TRINITY_DN16611_c0_g2	TBC1 domain family 3 evidence Inferred from Electronic Annotation
1729	Smp_210210.1	45.28	22.45	0.980801	6.10287	TRINITY_DN20929_c0_g1	tubulin tyrosine ligase solute carrier family evidence Inferred from Electronic Annotation
1730	Smp_145990.1	101.75	51.09	0.98006	7.26529	TRINITY_DN21382_c1_g2; TRINITY_DN21382_c1_g3	Caseinolytic peptidase B protein evidence Inferred from Electronic Annotation
1731	Smp_149430.1	49.22	24.46	0.98003	6.22265	TRINITY_DN20818_c0_g1	phenylalanyl tRNA synthetase evidence Inferred from Electronic Annotation
1732	Smp_008290.1	18.56	8.93	0.978041	4.83238	TRINITY_DN19631_c0_g2; TRINITY_DN51526_c0_g1	trafficking protein particle complex subunit 9 evidence Inferred from Electronic Annotation
1734	Smp_167550.1	27.65	13.57	0.975534	5.39985	TRINITY_DN22451_c0_g1; TRINITY_DN23765_c2_g17; TRINITY_DN23765_c2_g2; TRINITY_DN23765_c2_g22	sorting nexin 33 evidence Inferred from Electronic Annotation
1736	Smp_140360.1	49.17	24.54	0.974066	6.22323	TRINITY_DN15540_c0_g2; TRINITY_DN19257_c0_g2; TRINITY_DN19257_c0_g3; TRINITY_DN23882_c0_g20; TRINITY_DN23882_c0_g32; TRINITY_DN23882_c0_g33; TRINITY_DN43215_c0_g1; TRINITY_DN6155_c0_g1; TRINITY_DN69438_c0_g1	hypothetical protein evidence Inferred from Electronic Annotation
1737	Smp_196220.1	22.99	11.22	0.973189	5.13791	TRINITY_DN22292_c0_g1	zinc finger protein evidence Inferred from Electronic Annotation
1738	Smp_181470.1	159.96	81.03	0.972479	7.9188	TRINITY_DN21680_c0_g4	NMDA receptor glutamate binding chain evidence Inferred from Electronic Annotation
1739	Smp_161850.1	15.38	7.35	0.972087	4.56864	TRINITY_DN16879_c0_g1; TRINITY_DN20382_c1_g1; TRINITY_DN45596_c0_g1	monocarboxylate transporter evidence Inferred from Electronic Annotation
1740	Smp_140100.1	27.64	13.61	0.971075	5.40088	TRINITY_DN22955_c0_g1	double stranded RNA binding protein zn72d evidence Inferred from Electronic Annotation
1741	Smp_045590.1	26.3	12.94	0.96967	5.33056	TRINITY_DN11107_c0_g1; TRINITY_DN20742_c0_g10; TRINITY_DN6815_c0_g1	HEAT repeat containing protein 2 evidence Inferred from Electronic Annotation
1743	Smp_174490.1	41.12	20.55	0.966818	5.9697	TRINITY_DN14212_c0_g2; TRINITY_DN14212_c0_g3; TRINITY_DN14212_c0_g4; TRINITY_DN14977_c0_g1; TRINITY_DN14977_c0_g2	hypothetical protein evidence Inferred from Electronic Annotation
1744	Smp_122730.1	18.67	9.07	0.965933	4.84499	TRINITY_DN22944_c0_g1	cap specific mRNA evidence Inferred from Electronic Annotation
1745	Smp_018610.1	57.06	28.73	0.965625	6.43946	TRINITY_DN18577_c0_g1	Mediator of RNA polymerase II transcription evidence Inferred from Electronic Annotation
1746	Smp_037230.1	51.01	25.64	0.965195	6.27891	TRINITY_DN23862_c0_g1	fimbrin with UniProtKB:Q26574 evidence Non-traceable Author Statemen
1747	Smp_210160.1	24.99	12.32	0.964363	5.25965	TRINITY_DN23819_c1_g6	DNAJ heat shock N terminal domain containing protein evidence Inferred from Electronic Annotation
1749	Smp_079860.2	18.73	9.12	0.963182	4.8505	TRINITY_DN22140_c0_g5; TRINITY_DN5445_c0_g1	o acyltransferase (membrane bound) domain evidence Inferred from Electronic Annotation
1750	Smp_000040.1	53.76	27.09	0.963066	6.35491	TRINITY_DN18312_c0_g1; TRINITY_DN3130_c0_g1; TRINITY_DN3130_c0_g2	kinesin light chain evidence Inferred from Electronic Annotation
1751	Smp_161790.2	53.74	27.08	0.963052	6.35438	TRINITY_DN20008_c0_g2	hypothetical protein evidence Inferred from Electronic Annotation
1752	Smp_243670.1	18.23	8.87	0.962237	4.8125	TRINITY_DN19974_c0_g1; TRINITY_DN3761_c0_g1	DNA topoisomerase 3 beta 1 evidence Inferred from Electronic Annotation
1755	Smp_038030.1	19.29	9.45	0.957266	4.89433	TRINITY_DN22971_c0_g2	adenylosuccinate lyase db_xref PMID:12392914 evidence Traceable Author Statemen
1757	Smp_018760.1	65.52	33.31	0.955159	6.6414	TRINITY_DN16673_c0_g1	neutral alpha glucosidase AB evidence Inferred from Electronic Annotation
1758	Smp_078710.1	84.82	43.28	0.954659	7.01235	TRINITY_DN10844_c0_g1; TRINITY_DN18679_c1_g7; TRINITY_DN22162_c0_g2; TRINITY_DN22162_c0_g3; TRINITY_DN22162_c0_g4; TRINITY_DN38177_c0_g1	hypothetical protein evidence Inferred from Electronic Annotation
1759	Smp_135510.1	39.27	19.79	0.953816	5.90833	TRINITY_DN20417_c0_g1	n acetylated alpha linked acidic dipeptidase 2 evidence Inferred from Electronic Annotation
1761	Smp_199450.1	371.38	191.28	0.953567	9.13868	TRINITY_DN23815_c3_g4; TRINITY_DN23815_c3_g5; TRINITY_DN23815_c3_g6	39S ribosomal protein L2%2C mitochondrial evidence Inferred from Electronic Annotation
1762	Smp_042050.1	26.66	13.29	0.952795	5.35579	TRINITY_DN21982_c0_g1	CWF19 protein 2 like evidence Inferred from Electronic Annotation
1763	Smp_199560.1	23.5	11.66	0.952504	5.17632	TRINITY_DN21925_c0_g1	homeodomain transcription factor (phtf) evidence Inferred from Electronic Annotation
1764	Smp_176070.1	17.96	8.8	0.952105	4.79494	TRINITY_DN19533_c0_g1; TRINITY_DN50518_c0_g1	ralA binding protein 1 evidence Inferred from Electronic Annotation
1766	Smp_021340.1	102.16	52.46	0.948352	7.28188	TRINITY_DN22266_c0_g1	max dimerization protein 3 evidence Inferred from Electronic Annotation
1767	Smp_175040.1	17.4	8.54	0.947645	4.75168	TRINITY_DN20653_c0_g1	polyhomeotic proximal chromatin protein evidence Inferred from Electronic Annotation
1768	Smp_049270.1	13.71	6.63	0.947042	4.41549	TRINITY_DN22542_c0_g1	Major egg antigen (p40) evidence Inferred from Electronic Annotation
1771	Smp_153720.1	61.54	31.46	0.946116	6.55459	TRINITY_DN17545_c0_g1; TRINITY_DN17806_c0_g1; TRINITY_DN17806_c1_g1; TRINITY_DN58688_c0_g1	hypothetical protein evidence Inferred from Electronic Annotation
1772	Smp_157410.1	91.35	47.01	0.943777	7.12267	TRINITY_DN12431_c0_g1; TRINITY_DN12431_c0_g2; TRINITY_DN12431_c0_g3; TRINITY_DN16731_c0_g1; TRINITY_DN18084_c0_g1; TRINITY_DN18084_c0_g2; TRINITY_DN18084_c0_g3; TRINITY_DN19803_c0_g1; TRINITY_DN20560_c0_g1; TRINITY_DN21801_c0_g1; TRINITY_DN21801_c0_g2; TRINITY_DN32709_c0_g1; TRINITY_DN34715_c0_g1; TRINITY_DN46834_c0_g1; TRINITY_DN50477_c0_g1; TRINITY_DN50623_c0_g1; TRINITY_DN52798_c0_g1; TRINITY_…	dynein heavy chain evidence Inferred from Electronic Annotation
1773	Smp_165550.1	31.99	16.16	0.942979	5.61912	TRINITY_DN18091_c0_g1	AFG3 protein 1 like evidence Inferred from Electronic Annotation
1774	Smp_139400.1	15.26	7.46	0.942598	4.56803	TRINITY_DN13209_c0_g1; TRINITY_DN21213_c11_g1; TRINITY_DN3681_c0_g1; TRINITY_DN47895_c0_g1; TRINITY_DN5971_c0_g1; TRINITY_DN5971_c0_g2	tensin 1 evidence Inferred from Electronic Annotation
1775	Smp_014670.1	30.22	15.25	0.942031	5.53823	TRINITY_DN23344_c0_g1; TRINITY_DN41212_c0_g1	adducin related protein evidence Inferred from Electronic Annotation
1776	Smp_127940.1	15.2	7.45	0.938971	4.56377	TRINITY_DN16717_c0_g1; TRINITY_DN17724_c0_g1	sodium driven chloride bicarbonate exchanger evidence Inferred from Electronic Annotation
1778	Smp_131100.1	10.23	4.86	0.938385	4.00809	TRINITY_DN20320_c0_g1; TRINITY_DN65537_c0_g1	endoplasmic reticulum multispan transmembrane evidence Inferred from Electronic Annotation
1780	Smp_097020.2	16.31	8.04	0.937211	4.66391	TRINITY_DN23497_c0_g1	F box:LRR repeat protein 2 evidence Inferred from Electronic Annotation
1781	Smp_151050.1	18.97	9.44	0.935713	4.87823	TRINITY_DN19077_c5_g1; TRINITY_DN23824_c1_g3; TRINITY_DN23909_c16_g5	protein roadkill evidence Inferred from Electronic Annotation
1785	Smp_214030.1	494.46	259.11	0.929647	9.55951	TRINITY_DN18917_c0_g2	metallo beta lactamase domain containing protein evidence Inferred from Electronic Annotation
1786	Smp_129630.1	47.08	24.26	0.928582	6.17672	TRINITY_DN20928_c0_g1	Pseudouridylate synthase 7 evidence Inferred from Electronic Annotation
1787	Smp_141600.1	20.03	10.05	0.928402	4.95791	TRINITY_DN10870_c1_g1; TRINITY_DN13719_c2_g1; TRINITY_DN15526_c0_g1; TRINITY_DN15526_c0_g2; TRINITY_DN32660_c0_g1; TRINITY_DN70912_c0_g1	UHRF1 binding protein 1 evidence Inferred from Electronic Annotation
1788	Smp_243180.1	172.22	90.05	0.927875	8.0404	TRINITY_DN21087_c0_g1	calpain 7 (C02 family) evidence Inferred from Electronic Annotation
1789	Smp_048980.1	14.62	7.22	0.926184	4.51349	TRINITY_DN16336_c0_g1; TRINITY_DN16650_c0_g1	ligand of numb protein ubiquitin protein ligase lnx evidence Inferred from Electronic Annotation
1790	Smp_046360.1	29	14.8	0.925038	5.48543	TRINITY_DN12278_c0_g1; TRINITY_DN37085_c0_g1; TRINITY_DN44812_c0_g1	Zinc finger protein 143 evidence Inferred from Electronic Annotation
1791	Smp_097700.1	13.54	6.66	0.924611	4.40599	TRINITY_DN18067_c0_g1; TRINITY_DN27962_c0_g1	Nuclear Receptor subfamily - retinoid-x-receptor (RXR) db_xref PMID:9988692 evidence Traceable Author Statemen
1792	SjMEG-6_h12869_g1_i1_being_checked_17_03_08	163.08	85.49	0.923794	7.9633	TRINITY_DN17634_c0_g1; TRINITY_DN19414_c0_g1; TRINITY_DN19414_c0_g2; TRINITY_DN19414_c0_g3; TRINITY_DN19414_c0_g4; TRINITY_DN19414_c0_g5; TRINITY_DN19414_c0_g6	-
1793	Smp_076560.2	18.87	9.49	0.921577	4.87578	TRINITY_DN23189_c0_g2	cyclin t1 evidence Inferred from Electronic Annotation
1795	Smp_179490.1	28.37	14.51	0.921145	5.45549	TRINITY_DN20931_c0_g1; TRINITY_DN27239_c0_g1; TRINITY_DN30069_c0_g1; TRINITY_DN69448_c0_g1	hypothetical protein evidence Inferred from Electronic Annotation
1796	Smp_034270.2	27.65	14.13	0.921123	5.41886	TRINITY_DN15440_c3_g1; TRINITY_DN17325_c0_g1	hypothetical protein evidence Inferred from Electronic Annotation
1797	Smp_139760.1	19.26	9.7	0.921023	4.90497	TRINITY_DN18238_c0_g2; TRINITY_DN23510_c4_g11; TRINITY_DN23510_c4_g7; TRINITY_DN23510_c4_g8; TRINITY_DN9155_c0_g1	Kinesin Light Chain family member (klc 2) evidence Inferred from Electronic Annotation
1798	Smp_162640.1	97.02	50.78	0.920681	7.21723	TRINITY_DN12716_c0_g1; TRINITY_DN12948_c0_g1; TRINITY_DN21138_c2_g1; TRINITY_DN21457_c0_g1; TRINITY_DN30422_c0_g1	hypothetical protein evidence Inferred from Electronic Annotation
1799	Smp_167310.1	22.49	11.41	0.920544	5.12516	TRINITY_DN20951_c0_g1	methionyl tRNA formyltransferase%2C mitochondrial evidence Inferred from Electronic Annotation
1800	Smp_009540.1	10.16	4.9	0.91955	4.0054	TRINITY_DN12764_c0_g1; TRINITY_DN12764_c0_g2; TRINITY_DN71342_c0_g1	tripartite motif containing protein 2 evidence Inferred from Electronic Annotation
1802	Smp_157720.1	25.03	12.77	0.918647	5.27798	TRINITY_DN12172_c0_g1; TRINITY_DN20522_c0_g1; TRINITY_DN8019_c0_g1	hypothetical protein evidence Inferred from Electronic Annotation
1803	Smp_053030.1	82.58	43.24	0.917806	6.98664	TRINITY_DN17269_c0_g1	vacuolar protein sorting 36 evidence Inferred from Electronic Annotation
1806	Smp_126140.1	44.24	22.96	0.916971	6.0917	TRINITY_DN23861_c7_g19; TRINITY_DN23861_c7_g9; TRINITY_DN29868_c0_g1; TRINITY_DN43730_c0_g1; TRINITY_DN5004_c0_g1	integrin alpha 5 evidence Inferred from Electronic Annotation
1808	Smp_103090.1	12.3	6.07	0.911644	4.27575	TRINITY_DN18900_c0_g1; TRINITY_DN18900_c0_g2; TRINITY_DN18900_c0_g3; TRINITY_DN18900_c0_g5	histone lysine N methyltransferase SETD2 evidence Inferred from Electronic Annotation
1809	Smp_129650.1	35.77	18.55	0.911361	5.78973	TRINITY_DN17970_c0_g1	isoleucyl tRNA synthetase%2C mitochondrial evidence Inferred from Electronic Annotation
1810	Smp_213390.1	56.29	29.49	0.909947	6.43929	TRINITY_DN20361_c0_g2; TRINITY_DN20361_c0_g3; TRINITY_DN23629_c0_g1	ribosomal protein s6 kinase beta 1 evidence Inferred from Electronic Annotation
1811	Smp_152460.1	14.94	7.49	0.908815	4.55029	TRINITY_DN20633_c0_g1; TRINITY_DN61878_c0_g1	hypothetical protein evidence Inferred from Electronic Annotation
1814	Smp_145560.1	14.63	7.33	0.907929	4.52105	TRINITY_DN16402_c0_g1; TRINITY_DN56921_c0_g1	oxalate:formate antiporter evidence Inferred from Electronic Annotation
1815	Smp_149550.1	12.32	6.1	0.907703	4.27947	TRINITY_DN22568_c0_g7	hypothetical protein evidence Inferred from Electronic Annotation
1816	Smp_247270.1	16.63	8.4	0.9073	4.7021	TRINITY_DN22352_c0_g7; TRINITY_DN22352_c0_g8	hypothetical protein
1817	Smp_164680.1	33.69	17.5	0.906995	5.7057	TRINITY_DN18955_c0_g1; TRINITY_DN22304_c0_g7; TRINITY_DN23809_c0_g4; TRINITY_DN59833_c0_g1; TRINITY_DN651_c0_g1; TRINITY_DN651_c0_g2	ras gtpase activating protein evidence Inferred from Electronic Annotation
1819	Smp_151600.1	58.53	30.75	0.90686	6.49633	TRINITY_DN20363_c0_g1; TRINITY_DN24336_c0_g1	neuronal calcium sensor 2 evidence Inferred by Curato
1820	Smp_080520.1	26.78	13.83	0.905528	5.37886	TRINITY_DN11472_c0_g1; TRINITY_DN23015_c2_g1; TRINITY_DN606_c0_g1; TRINITY_DN61115_c0_g1; TRINITY_DN7374_c0_g1; TRINITY_DN7374_c0_g2	transcriptional activator evidence Inferred from Electronic Annotation
1821	Smp_025750.1	13.09	6.53	0.90395	4.36597	TRINITY_DN19751_c0_g1; TRINITY_DN19751_c0_g2	hypothetical protein evidence Inferred from Electronic Annotation
1822	Smp_160000.2	46.09	24.17	0.903716	6.15502	TRINITY_DN15741_c0_g1; TRINITY_DN15741_c0_g2; TRINITY_DN16072_c0_g1; TRINITY_DN22512_c0_g1; TRINITY_DN29791_c0_g1; TRINITY_DN66500_c0_g1	DEAD box ATP dependent RNA helicase evidence Inferred from Electronic Annotation
1823	Smp_072980.1	105.77	56.09	0.903196	7.34749	TRINITY_DN21993_c0_g1	eukaryotic elongation factor 2 kinase evidence Inferred from Electronic Annotation
1824	Smp_007210.1	29.05	15.08	0.902098	5.49601	TRINITY_DN14413_c0_g1; TRINITY_DN17921_c0_g1; TRINITY_DN40058_c0_g1	rab GTPase activating protein 1 evidence Inferred from Electronic Annotation
1825	Smp_213630.1	19.8	10.14	0.900834	4.9514	TRINITY_DN23228_c1_g2; TRINITY_DN23228_c1_g3; TRINITY_DN23511_c0_g6; TRINITY_DN23511_c0_g7; TRINITY_DN31868_c0_g1	hypothetical protein evidence Inferred from Electronic Annotation
1827	Smp_175640.1	10.05	4.92	0.900377	3.99729	TRINITY_DN67983_c0_g1; TRINITY_DN67983_c0_g2; TRINITY_DN71091_c0_g1; TRINITY_DN8378_c0_g1	hypothetical protein evidence Inferred from Electronic Annotation
1829	Smp_090860.1	43.9	23.06	0.900079	6.08661	TRINITY_DN21241_c0_g1	protein phosphatase 5 evidence Inferred from Electronic Annotation
1830	Smp_034410.2	10.81	5.33	0.899732	4.0993	TRINITY_DN22489_c0_g1	cathepsin F (C01 family) evidence Inferred from Electronic Annotation
1832	Smp_134660.1	15.94	8.09	0.898082	4.64559	TRINITY_DN14944_c0_g1; TRINITY_DN33353_c0_g1	radial spoke head protein 4 A evidence Inferred from Electronic Annotation
1833	Smp_130790.2	16.56	8.43	0.896963	4.69988	TRINITY_DN23128_c0_g2	eukaryotic release factor 3 (erfs) evidence Inferred from Electronic Annotation
1835	Smp_121880.1	23.92	12.42	0.892919	5.22265	TRINITY_DN21707_c0_g1	hypothetical protein evidence Inferred from Electronic Annotation
1836	Smp_014050.1	43.13	22.77	0.892618	6.06393	TRINITY_DN23491_c0_g1; TRINITY_DN23491_c0_g2; TRINITY_DN34630_c0_g1; TRINITY_DN45017_c0_g1	F box only protein 42 evidence Inferred from Electronic Annotation
1838	Smp_065110.1	43.61	23.06	0.890731	6.08044	TRINITY_DN23252_c0_g1	LETM1 and EF hand domain containing protein 1 evidence Inferred from Electronic Annotation
1839	Smp_213350.1	81.43	43.53	0.888392	6.97682	TRINITY_DN17884_c0_g1	39S ribosomal protein L51%2C mitochondrial evidence Inferred from Electronic Annotation
1840	Smp_177060.1	21.05	10.94	0.884976	5.04396	TRINITY_DN17722_c0_g1	Protein TRC8 evidence Inferred from Electronic Annotation
1842	Smp_246800.1	34.5	18.23	0.88446	5.74766	TRINITY_DN21451_c0_g1; TRINITY_DN30294_c0_g1	aspartyl aminopeptidase (M18 family) evidence Inferred from Electronic Annotation,term aspartyl aminopeptidase evidence Inferred from Electronic Annotation
1843	Smp_013860.1	126.34	68.05	0.882972	7.61021	TRINITY_DN21613_c0_g1; TRINITY_DN21613_c0_g2; TRINITY_DN68305_c0_g1	glutamate cysteine ligase catalytic subunit evidence Inferred from Electronic Annotation
1844	Smp_093220.1	18.28	9.46	0.882222	4.84499	TRINITY_DN16776_c0_g1; TRINITY_DN16776_c0_g2; TRINITY_DN22644_c0_g12; TRINITY_DN23885_c3_g4; TRINITY_DN33726_c0_g1; TRINITY_DN49521_c0_g1; TRINITY_DN53219_c0_g1	Ankyrin repeat domain containing protein evidence Inferred from Electronic Annotation
1846	Smp_121780.1	21.81	11.39	0.88049	5.09592	TRINITY_DN21342_c0_g1; TRINITY_DN41181_c0_g1	myosin light chain kinase%2C smooth muscle evidence Inferred from Electronic Annotation
1847	Smp_181260.1	31.03	16.4	0.880336	5.59783	TRINITY_DN20569_c0_g1; TRINITY_DN20569_c0_g2	hypothetical protein evidence Inferred from Electronic Annotation
1848	Smp_120180.1	51.76	27.68	0.8794	6.32984	TRINITY_DN19488_c0_g1; TRINITY_DN21956_c0_g1; TRINITY_DN23024_c2_g3	NAD dependent epimerase:dehydratase evidence Inferred from Electronic Annotation
1849	Smp_142780.1	23.54	12.34	0.879377	5.20477	TRINITY_DN19724_c11_g1; TRINITY_DN22111_c0_g1	retinoblastoma binding protein 5 evidence Inferred from Electronic Annotation
1851	Smp_205890.1	117.61	63.49	0.879078	7.50859	TRINITY_DN23203_c1_g5	nucleic acid binding evidence Inferred from Electronic Annotation
1852	Smp_017080.2	20.42	10.66	0.877391	5.0036	TRINITY_DN16256_c0_g1; TRINITY_DN21364_c0_g1	zinc finger CCCH type with G patch evidence Inferred from Electronic Annotation
1853	Smp_043150.1	397.33	215.9	0.876934	9.26264	TRINITY_DN19225_c0_g1	calnexin evidence Inferred from Electronic Annotation
1854	Smp_105540.1	15.05	7.74	0.876868	4.57228	TRINITY_DN19380_c0_g1	tensin evidence Inferred from Electronic Annotation
1857	Smp_160870.1	69.23	37.32	0.87399	6.74886	TRINITY_DN12580_c0_g2; TRINITY_DN18357_c0_g2	nuclear valosin containing protein evidence Inferred from Electronic Annotation
1858	Smp_133300.1	11.49	5.82	0.87293	4.19456	TRINITY_DN23373_c0_g1; TRINITY_DN23867_c3_g2	5' 3' exoribonuclease 2 evidence Inferred from Electronic Annotation
1860	Smp_212340.1	22.12	11.63	0.872287	5.11894	TRINITY_DN23240_c0_g2; TRINITY_DN47885_c0_g1	hypothetical protein evidence Inferred from Electronic Annotation
1861	Smp_015840.1	32.75	17.44	0.872049	5.67779	TRINITY_DN23619_c1_g1	zinc finger and SCAN domain containing protein evidence Inferred from Electronic Annotation
1862	Smp_132930.1	14.02	7.21	0.871431	4.47444	TRINITY_DN18971_c2_g1; TRINITY_DN72324_c0_g1	cubilin evidence Inferred from Electronic Annotation
1863	Smp_169510.1	15.26	7.89	0.871072	4.59395	TRINITY_DN20450_c0_g1; TRINITY_DN28292_c0_g1	PI3kinase evidence Inferred from Electronic Annotation
1864	Smp_044970.1	51.37	27.64	0.870709	6.32211	TRINITY_DN12211_c0_g1; TRINITY_DN23508_c0_g1; TRINITY_DN51647_c0_g1	oxoglutarate (alpha ketoglutarate) dehydrogenase evidence Inferred from Sequence or Structural Similarity
1865	Smp_130810.1	32.71	17.44	0.870338	5.67666	TRINITY_DN20075_c0_g2; TRINITY_DN20075_c0_g4; TRINITY_DN23441_c0_g2; TRINITY_DN23887_c11_g25; TRINITY_DN2721_c0_g1; TRINITY_DN4443_c0_g1; TRINITY_DN45804_c0_g1; TRINITY_DN49047_c0_g1; TRINITY_DN49520_c0_g1; TRINITY_DN51558_c0_g1; TRINITY_DN5515_c0_g1	dynein heavy chain evidence Inferred from Electronic Annotation
1866	Smp_125160.1	82.22	44.53	0.870113	6.99718	TRINITY_DN18100_c0_g1; TRINITY_DN43428_c0_g1	smoothened evidence Inferred from Electronic Annotation
1867	Smp_244280.1	46.75	25.14	0.869242	6.18765	TRINITY_DN20045_c0_g1; TRINITY_DN22078_c0_g1; TRINITY_DN70997_c0_g1	hypothetical protein evidence Inferred from Electronic Annotation
1868	Smp_148720.1	66.24	35.82	0.86883	6.68734	TRINITY_DN11282_c0_g1; TRINITY_DN15549_c0_g1; TRINITY_DN15549_c0_g2; TRINITY_DN2490_c0_g1; TRINITY_DN66810_c0_g1	t3:t7 bacteriophage mitochodrial evidence Inferred from Electronic Annotation
1869	Smp_165260.1	28.62	15.24	0.86702	5.48736	TRINITY_DN12526_c0_g1; TRINITY_DN12526_c0_g2; TRINITY_DN19436_c0_g2; TRINITY_DN53964_c0_g1; TRINITY_DN9677_c0_g3	WW domain protein (E3 ubiquitin ligase) family evidence Inferred from Electronic Annotation
1870	Smp_147360.1	54.1	29.22	0.866549	6.3978	TRINITY_DN1281_c0_g1; TRINITY_DN1281_c0_g2; TRINITY_DN48300_c0_g1; TRINITY_DN49666_c0_g1	cleavage stimulation factor subunit 3 evidence Inferred from Electronic Annotation
1871	Smp_063260.1	70.52	38.23	0.866389	6.77808	TRINITY_DN21950_c0_g1	phosphoinositide binding protein evidence Inferred from Electronic Annotation
1872	Smp_112930.1	18.87	9.9	0.866264	4.89579	TRINITY_DN20316_c0_g1; TRINITY_DN20316_c0_g2	hypothetical protein evidence Inferred from Electronic Annotation
1873	Smp_056990.1	59.9	32.42	0.86573	6.54411	TRINITY_DN20846_c0_g1; TRINITY_DN24968_c0_g2; TRINITY_DN30989_c0_g1	thyroid receptor interacting protein 11 evidence Inferred from Electronic Annotation
1875	Smp_091850.1	283.15	155.28	0.86252	8.77949	TRINITY_DN12413_c0_g1; TRINITY_DN12413_c0_g2; TRINITY_DN12413_c0_g3; TRINITY_DN12413_c0_g4	glucosamine 6 phosphate isomerase evidence Inferred from Electronic Annotation
1876	Smp_015510.1	51.46	27.86	0.862147	6.32769	TRINITY_DN22772_c0_g3	hypothetical protein evidence Inferred from Electronic Annotation
1877	Smp_180380.1	13.79	7.14	0.861521	4.45483	TRINITY_DN20686_c0_g1; TRINITY_DN65663_c0_g1	origin recognition complex protein 1 evidence Inferred from Electronic Annotation
1878	Smp_153560.1	12.64	6.51	0.860959	4.33271	TRINITY_DN23707_c0_g1	RING finger protein B (Protein rngB) evidence Inferred from Electronic Annotation
1879	Smp_241460.1	36.13	19.45	0.860484	5.82222	TRINITY_DN14241_c0_g6; TRINITY_DN21441_c0_g1; TRINITY_DN21441_c0_g2; TRINITY_DN58207_c0_g1	hypothetical protein evidence Inferred from Electronic Annotation
1880	Smp_173000.1	10.36	5.26	0.859728	4.05485	TRINITY_DN17162_c0_g2; TRINITY_DN17162_c0_g4	r specific enoyl coenzyme a hydratase evidence Inferred from Electronic Annotation
1881	Smp_199000.1	24.33	12.96	0.859548	5.2589	TRINITY_DN21231_c0_g1	hypothetical protein evidence Inferred from Electronic Annotation
1882	Smp_169950.1	42.71	23.11	0.858332	6.06221	TRINITY_DN17842_c0_g1	casein kinase I delta evidence Inferred from Electronic Annotation
1884	Smp_149300.1	23.48	12.51	0.857576	5.20906	TRINITY_DN21917_c0_g1	splicing factor suppressor of white apricot evidence Inferred from Electronic Annotation
1885	Smp_242740.1	60.17	32.76	0.857509	6.55351	TRINITY_DN11530_c0_g1; TRINITY_DN13698_c0_g1; TRINITY_DN13698_c0_g3; TRINITY_DN21046_c0_g1; TRINITY_DN21046_c0_g2; TRINITY_DN5460_c0_g1; TRINITY_DN61315_c0_g1; TRINITY_DN8294_c0_g1	CCR4 NOT transcription complex subunit 1 evidence Inferred from Electronic Annotation
1886	Smp_161430.1	11.77	6.05	0.857063	4.23419	TRINITY_DN16147_c0_g3; TRINITY_DN24696_c0_g1; TRINITY_DN68379_c0_g1	Monocarboxylate transporter 12 evidence Inferred from Electronic Annotation
1887	Smp_242400.1	34.13	18.41	0.855903	5.74255	TRINITY_DN15928_c0_g1; TRINITY_DN19064_c0_g3; TRINITY_DN23441_c0_g3	hypothetical protein evidence Inferred from Electronic Annotation
1889	Smp_139430.1	31.55	17	0.854661	5.63081	TRINITY_DN22464_c0_g1; TRINITY_DN22464_c0_g2	pleckstrin y domain containing family A evidence Inferred from Electronic Annotation,term phosphoinositol 4 phosphate adaptor protein evidence Inferred from Electronic Annotation
1890	Smp_174950.1	13387.9	7416.06	0.852122	14.3446	TRINITY_DN13454_c0_g1	ribosomal protein S19e evidence Inferred from Electronic Annotation
1891	Smp_122930.1	44.71	24.34	0.851093	6.13031	TRINITY_DN19075_c0_g1	acyl coenzyme A dehydrogenase family evidence Inferred from Electronic Annotation
1892	Smp_245420.1	14.67	7.69	0.850577	4.54597	TRINITY_DN17835_c0_g1; TRINITY_DN67584_c0_g1	cullin 5 evidence Inferred from Electronic Annotation
1893	Smp_126110.1	119.43	65.79	0.850491	7.54086	TRINITY_DN19153_c0_g1; TRINITY_DN19153_c0_g4; TRINITY_DN19153_c0_g5	katanin p60 ATPase containing subunit A1 evidence Inferred from Electronic Annotation
1894	Smp_123180.1	14.38	7.53	0.850438	4.51791	TRINITY_DN23257_c0_g3; TRINITY_DN23257_c0_g5; TRINITY_DN2544_c0_g1; TRINITY_DN9268_c0_g1	NEDD4 E3 ubiquitin protein ligase WWP1 evidence Inferred from Electronic Annotation
1895	Smp_147840.1	22.31	11.93	0.850227	5.13914	TRINITY_DN15695_c0_g1; TRINITY_DN21406_c0_g1; TRINITY_DN21406_c0_g2; TRINITY_DN67645_c0_g1	cytosolic purine 5' nucleotidase evidence Inferred from Electronic Annotation
1896	Smp_194650.1	42.3	23.02	0.850131	6.05137	TRINITY_DN20774_c0_g1	hypothetical protein evidence Inferred from Electronic Annotation
1897	Smp_150270.1	25.16	13.52	0.849321	5.31034	TRINITY_DN22543_c0_g4; TRINITY_DN24954_c0_g1; TRINITY_DN37304_c0_g1; TRINITY_DN37304_c0_g2	cullin 1 evidence Inferred from Electronic Annotation
1899	Smp_092780.2	239.05	132.38	0.847793	8.54083	TRINITY_DN20480_c0_g1; TRINITY_DN20480_c0_g2	snRNA activating protein complex subunit 3 evidence Inferred from Electronic Annotation
1901	Smp_102430.1	31.63	17.14	0.847025	5.6372	TRINITY_DN16343_c0_g2; TRINITY_DN17252_c0_g2; TRINITY_DN4549_c0_g1; TRINITY_DN6155_c0_g2	alpha 1%2C6 mannosylglycoprotein evidence Inferred from Electronic Annotation
1902	Smp_147140.1	13.8	7.23	0.846633	4.4614	TRINITY_DN10793_c0_g1; TRINITY_DN1362_c0_g1; TRINITY_DN1362_c0_g2; TRINITY_DN2301_c0_g1; TRINITY_DN58007_c0_g1	transient receptor potential cation channel evidence Inferred from Electronic Annotation
1903	Smp_174310.1	11.12	5.75	0.84443	4.15947	TRINITY_DN18751_c0_g2; TRINITY_DN18751_c0_g3	hypothetical protein evidence Inferred from Electronic Annotation
1906	Smp_194140.1	33.55	18.27	0.842329	5.72301	TRINITY_DN23215_c0_g1	aspartyl tRNA synthetase evidence Inferred from Electronic Annotation
1907	Smp_089200.1	34.6	18.86	0.842012	5.76713	TRINITY_DN20736_c0_g1	multidrug resistance protein evidence Inferred from Electronic Annotation
1908	Smp_149590.1	13.68	7.19	0.841917	4.45088	TRINITY_DN17671_c0_g1	gamma aminobutyric acid receptor subunit evidence Inferred from Electronic Annotation
1909	Smp_213790.1	46.96	25.77	0.841215	6.20418	TRINITY_DN19546_c0_g3	family C54 unassigned peptidase (C54 family) evidence Inferred from Electronic Annotation
1910	Smp_170390.1	54.46	29.96	0.841042	6.4165	TRINITY_DN18535_c0_g3; TRINITY_DN18535_c0_g4; TRINITY_DN21909_c9_g2; TRINITY_DN22_c1_g1	protein kinase C binding protein 1 evidence Inferred from Electronic Annotation
1911	Smp_152230.1	79.29	43.83	0.840756	6.95559	TRINITY_DN12873_c0_g2; TRINITY_DN17670_c0_g1	WD repeat containing protein 24 evidence Inferred from Electronic Annotation
1914	Smp_000190.1	158.41	88.13	0.838759	7.95152	TRINITY_DN11327_c0_g2; TRINITY_DN20863_c1_g1	short chain dehydrogenase:reductase family 16C evidence Inferred from Electronic Annotation
1915	Smp_126910.1	30.12	16.4	0.838755	5.57046	TRINITY_DN23827_c1_g1	periodic tryptophan protein 2 evidence Inferred from Electronic Annotation
1916	Smp_095090.1	21.21	11.42	0.838544	5.07168	TRINITY_DN19691_c0_g1	solute carrier family 37 evidence Inferred from Electronic Annotation
1917	Smp_032820.1	142.82	79.45	0.8381	7.80265	TRINITY_DN19461_c1_g4	smu 1 suppressor of mec 8 and unc 52 evidence Inferred from Electronic Annotation
1918	Smp_210070.1	21.05	11.34	0.837436	5.06134	TRINITY_DN1381_c0_g1; TRINITY_DN19353_c0_g1; TRINITY_DN46662_c0_g1; TRINITY_DN49752_c0_g1	integrator complex subunit evidence Inferred from Electronic Annotation
1921	Smp_005390.2	33.99	18.59	0.836825	5.74362	TRINITY_DN15667_c0_g1; TRINITY_DN15667_c0_g2; TRINITY_DN15667_c0_g3; TRINITY_DN22833_c0_g1; TRINITY_DN22833_c0_g2	acetolactate synthase protein evidence Inferred from Electronic Annotation
1922	Smp_052630.1	11.02	5.73	0.836758	4.14975	TRINITY_DN2011_c0_g1; TRINITY_DN2011_c0_g2; TRINITY_DN61637_c0_g1	amiloride sensitive sodium channel evidence Inferred from Electronic Annotation
1923	Smp_053300.1	86.61	48.06	0.836548	7.08396	TRINITY_DN16468_c0_g1	histone H4 evidence Inferred from Electronic Annotation
1925	Smp_035560.1	2785.2	1560.74	0.835145	12.0858	TRINITY_DN18881_c0_g2	hypothetical protein evidence Inferred from Electronic Annotation
1926	Smp_102160.1	56.93	31.5	0.833871	6.48269	TRINITY_DN19885_c0_g1; TRINITY_DN19885_c0_g2; TRINITY_DN19885_c0_g4; TRINITY_DN19885_c0_g5; TRINITY_DN19885_c0_g6; TRINITY_DN19885_c0_g7	vesicle associated membrane protein 1 evidence Inferred from Electronic Annotation,term synaptobrevin-like protein db_xref PMID:7665603 evidence Traceable Author Statemen
1927	Smp_211070.1	112.2	62.61	0.831548	7.45787	TRINITY_DN23677_c0_g2; TRINITY_DN23677_c0_g3; TRINITY_DN23677_c0_g4; TRINITY_DN23677_c0_g5; TRINITY_DN23677_c0_g6	NEDD8 activating enzyme E1 catalytic subunit evidence Inferred from Electronic Annotation
1928	Smp_093540.2	24.93	13.58	0.830631	5.30415	TRINITY_DN20140_c0_g1; TRINITY_DN20335_c2_g3; TRINITY_DN4131_c0_g1	activin receptor type 1 evidence Inferred from Electronic Annotation
1929	Smp_172220.1	41.11	22.68	0.830494	6.0177	TRINITY_DN21831_c0_g1; TRINITY_DN4469_c0_g1	tetratricopeptide repeat protein 35 B evidence Inferred from Electronic Annotation
1932	Smp_170550.1	112.02	62.61	0.829253	7.4564	TRINITY_DN23208_c0_g2; TRINITY_DN23891_c8_g13; TRINITY_DN23891_c8_g2; TRINITY_DN23891_c8_g27; TRINITY_DN64004_c0_g1	granulin evidence Inferred from Electronic Annotation
1933	Smp_007190.1	19.62	10.62	0.827434	4.96532	TRINITY_DN17599_c0_g1	lariat debranching enzyme evidence Inferred from Electronic Annotation
1934	Smp_066670.1	36.96	20.4	0.826869	5.86691	TRINITY_DN21644_c0_g1; TRINITY_DN21644_c0_g2; TRINITY_DN21644_c0_g3; TRINITY_DN21644_c0_g5; TRINITY_DN21644_c0_g6	syntaxin 1a evidence Inferred from Electronic Annotation
1935	Smp_014020.1	51.36	28.52	0.826772	6.33771	TRINITY_DN16802_c0_g1	cell cycle control protein 50a evidence Inferred from Electronic Annotation
1937	Smp_163300.1	83.24	46.53	0.825667	7.03089	TRINITY_DN20540_c0_g2; TRINITY_DN20540_c0_g5	scavenger mRNA decapping enzyme DcpS evidence Inferred from Electronic Annotation
1938	Smp_105220.1	29.82	16.39	0.825609	5.56102	TRINITY_DN23407_c0_g1; TRINITY_DN23407_c0_g2; TRINITY_DN23407_c0_g3	hypothetical protein evidence Inferred from Electronic Annotation
1939	Smp_160210.1	16.46	8.86	0.824394	4.71809	TRINITY_DN16105_c0_g6	ceramide glucosyltransferase evidence Inferred from Electronic Annotation
1940	Smp_121950.1	53	29.52	0.823204	6.38405	TRINITY_DN22821_c0_g1; TRINITY_DN35059_c1_g1	hypothetical protein evidence Inferred from Electronic Annotation
1942	Smp_019680.1	63.52	35.48	0.822641	6.64386	TRINITY_DN17291_c0_g1	wd repeat domain protein wd repeat containing protein evidence Inferred from Electronic Annotation
1943	Smp_008580.1	29.29	16.13	0.822316	5.53667	TRINITY_DN22203_c0_g2	UDP N acetylglucosamine transporter evidence Inferred from Electronic Annotation
1944	Smp_152510.1	29.34	16.16	0.822172	5.53916	TRINITY_DN21138_c1_g1; TRINITY_DN22844_c0_g5; TRINITY_DN22844_c0_g6; TRINITY_DN62090_c0_g1	CWF19 protein 1 evidence Inferred from Electronic Annotation
1945	Smp_173800.1	11.6	6.13	0.82145	4.22728	TRINITY_DN20410_c0_g1	hypothetical protein evidence Inferred from Electronic Annotation
1946	Smp_124390.1	119.91	67.47	0.82039	7.5575	TRINITY_DN23267_c0_g1; TRINITY_DN23267_c0_g2; TRINITY_DN51823_c0_g1	patatin phospholipase domain containing protein evidence Inferred from Electronic Annotation
1947	Smp_067000.7	96.75	54.36	0.820253	7.24897	TRINITY_DN21498_c0_g1	hypothetical protein evidence Inferred from Electronic Annotation
1948	Smp_173900.1	15.12	8.13	0.820165	4.59991	TRINITY_DN15107_c0_g1; TRINITY_DN23742_c4_g16	pyruvate dehydrogenase phosphatase evidence Inferred from Electronic Annotation
1949	Smp_133820.1	50.91	28.42	0.819215	6.32787	TRINITY_DN21219_c0_g1; TRINITY_DN21219_c0_g2; TRINITY_DN21219_c0_g3	peptidylprolyl isomerase domain and WD evidence Inferred from Electronic Annotation
1952	Smp_122960.2	37.87	21.04	0.818533	5.90472	TRINITY_DN18565_c0_g1	ubiquitin specific peptidase 30 (C19 family) evidence Inferred from Electronic Annotation
1953	Smp_006810.1	72.54	40.72	0.81779	6.83618	TRINITY_DN18946_c0_g1; TRINITY_DN7201_c0_g1	lim domain only 4 evidence Inferred from Electronic Annotation
1955	Smp_042550.1	51.58	28.85	0.816783	6.34749	TRINITY_DN21138_c2_g2; TRINITY_DN21138_c2_g6; TRINITY_DN22473_c0_g1	sorting nexin 2 evidence Inferred from Electronic Annotation
1956	Smp_148650.1	51.21	28.65	0.816294	6.33735	TRINITY_DN12765_c0_g1; TRINITY_DN14591_c0_g1; TRINITY_DN15661_c0_g1; TRINITY_DN3967_c0_g1; TRINITY_DN65539_c0_g1; TRINITY_DN68220_c0_g1	autophagy protein 2 evidence Inferred from Electronic Annotation
1957	Smp_069160.2	187.67	106.17	0.815964	8.20379	TRINITY_DN19395_c0_g1	peptidyl prolyl isomerase G evidence Inferred from Electronic Annotation
1959	Smp_213200.1	14.55	7.84	0.814796	4.54782	TRINITY_DN17678_c0_g2	amidohydrolase 2 evidence Inferred from Electronic Annotation
1960	Smp_152680.1	88.51	49.89	0.814667	7.12309	TRINITY_DN23788_c0_g10; TRINITY_DN23788_c0_g11; TRINITY_DN23788_c0_g2; TRINITY_DN23788_c0_g4; TRINITY_DN23788_c0_g6; TRINITY_DN23788_c0_g7; TRINITY_DN23788_c0_g9; TRINITY_DN35595_c0_g1	epidermal growth factor receptor evidence Inferred from Electronic Annotation
1962	Smp_008830.1	46.04	25.79	0.812193	6.18646	TRINITY_DN16746_c0_g1; TRINITY_DN19275_c0_g1; TRINITY_DN19520_c0_g2	SWI:SNF related%2C matrix associated%2C actin evidence Inferred from Electronic Annotation
1963	Smp_149200.1	45.94	25.74	0.811818	6.18349	TRINITY_DN21978_c0_g1; TRINITY_DN23705_c0_g4; TRINITY_DN29753_c0_g1; TRINITY_DN65900_c0_g1	dynactin subunit 1 evidence Inferred from Electronic Annotation
1965	Smp_035190.2	12.02	6.42	0.811238	4.28096	TRINITY_DN131_c0_g1; TRINITY_DN15429_c0_g2	ras GTP exchange factor son of sevenless evidence Inferred from Electronic Annotation
1966	Smp_149960.1	25.19	13.93	0.810802	5.32625	TRINITY_DN21079_c0_g1; TRINITY_DN22697_c0_g1	autophagy protein 9A evidence Inferred from Electronic Annotation
1967	Smp_058170.2	79.62	44.97	0.810445	6.97258	TRINITY_DN22907_c0_g1	fragile X mental retardation 1 evidence Inferred from Electronic Annotation
1969	Smp_208070.1	41.25	23.11	0.80932	6.03034	TRINITY_DN21372_c0_g1	CDC16 cell division cycle 16 evidence Inferred from Electronic Annotation
1970	Smp_171820.1	19.36	10.63	0.807886	4.95373	TRINITY_DN12554_c0_g1; TRINITY_DN12554_c0_g2; TRINITY_DN16403_c0_g1; TRINITY_DN23689_c0_g2; TRINITY_DN23867_c0_g1; TRINITY_DN41410_c0_g1; TRINITY_DN51439_c0_g1; TRINITY_DN66282_c0_g1	neuropathy target esterase:swiss cheese evidence Inferred from Electronic Annotation
1971	Smp_147420.1	30.88	17.22	0.807129	5.61765	TRINITY_DN21799_c0_g1	pro neuregulin membrane bound evidence Inferred from Electronic Annotation
1972	Smp_128980.1	41.37	23.22	0.806844	6.0354	TRINITY_DN20877_c2_g1; TRINITY_DN49876_c0_g1	aminomethyltransferase%2C mitochondrial evidence Inferred from Electronic Annotation
1973	Smp_074590.1	16.76	9.16	0.805731	4.75061	TRINITY_DN21871_c0_g2	hypothetical protein evidence Inferred from Electronic Annotation
1974	Smp_139900.1	12.37	6.65	0.805468	4.32337	TRINITY_DN20992_c0_g2; TRINITY_DN58049_c0_g1	lysophosphatidic acid phosphatase type 6 evidence Inferred from Electronic Annotation
1975	Smp_099930.1	49.13	27.73	0.803116	6.28281	TRINITY_DN11109_c0_g1; TRINITY_DN22664_c0_g1; TRINITY_DN5617_c0_g1; TRINITY_DN5617_c0_g2	f box:wd repeat containing protein 11 evidence Inferred from Electronic Annotation
1976	Smp_065370.1	10.04	5.33	0.802463	4.03298	TRINITY_DN18330_c0_g4; TRINITY_DN23864_c4_g6	hypothetical protein evidence Inferred from Electronic Annotation
1977	Smp_140410.1	10.61	5.66	0.801774	4.1102	TRINITY_DN17864_c0_g1	MAGUK p55 subfamily evidence Inferred from Electronic Annotation
1978	Smp_213590.1	61.6	34.92	0.801375	6.60763	TRINITY_DN23136_c1_g1	GDP-L-fucose transporter with UniProtKB:E2EAJ0 evidence Non-traceable Author Statemen
1981	Smp_126850.2	31.68	17.77	0.799979	5.65678	TRINITY_DN16668_c0_g2	RNA binding protein 5 evidence Inferred from Electronic Annotation
1983	Smp_129340.1	84.76	48.31	0.798425	7.06684	TRINITY_DN15784_c0_g1; TRINITY_DN16658_c0_g1	lissencephaly-1 homolog with UniProtKB:C4Q0P6 evidence Inferred from Sequence or Structural Similarity
1984	Smp_123550.1	29.45	16.52	0.797439	5.55367	TRINITY_DN18782_c1_g1	venom allergen (VAL) 8 protein db_xref PMID:18294395 evidence Traceable Author Statemen
1985	Smp_247900.1	97.49	55.67	0.797392	7.26828	TRINITY_DN22893_c0_g1; TRINITY_DN23694_c0_g2; TRINITY_DN23694_c0_g7	transmembrane 9 superfamily protein member evidence Inferred from Electronic Annotation
1986	Smp_199640.1	68.36	38.91	0.797354	6.75849	TRINITY_DN22309_c0_g1	SWI:SNF matrix associated evidence Inferred from Electronic Annotation
1987	Smp_100030.1	121.44	69.48	0.796789	7.58436	TRINITY_DN18471_c0_g1; TRINITY_DN31116_c0_g1	ribosome biogenesis protein BMS1 evidence Inferred from Electronic Annotation
1988	Smp_173480.1	27.83	15.6	0.796388	5.47346	TRINITY_DN23167_c0_g1	hypothetical protein evidence Inferred from Electronic Annotation
1989	Smp_148600.1	17.13	9.44	0.796257	4.78503	TRINITY_DN16425_c0_g3	hypothetical protein evidence Inferred from Electronic Annotation
1990	Smp_213300.1	279.86	160.81	0.79555	8.78683	TRINITY_DN23826_c0_g1; TRINITY_DN23826_c0_g3	transcriptional cofactor CA150 db_xref PMID:16904200 evidence Traceable Author Statemen
1991	Smp_079400.1	182.52	104.74	0.795416	8.17123	TRINITY_DN21637_c2_g3; TRINITY_DN21637_c2_g4	goliath e3 ubiquitin ligase evidence Inferred from Electronic Annotation
1992	Smp_036930.1	36.4	20.55	0.79535	5.85674	TRINITY_DN21923_c0_g2; TRINITY_DN8972_c0_g2	hypothetical protein evidence Inferred from Electronic Annotation
1993	Smp_173620.1	10.87	5.84	0.795252	4.14649	TRINITY_DN16415_c0_g1; TRINITY_DN19108_c0_g1; TRINITY_DN38408_c0_g1	transmembrane protein C9orf5 evidence Inferred from Electronic Annotation
1994	Smp_214110.1	141.92	81.36	0.795192	7.80916	TRINITY_DN21565_c0_g4	-
1995	Smp_179000.1	34.92	19.71	0.79446	5.79779	TRINITY_DN17180_c0_g1; TRINITY_DN40114_c0_g1	PHD and RING finger domain containing protein 1 evidence Inferred from Electronic Annotation
1996	Smp_135460.1	10.55	5.66	0.794299	4.10518	TRINITY_DN18996_c0_g3; TRINITY_DN34234_c0_g1	hypothetical protein evidence Inferred from Electronic Annotation
1997	Smp_003980.1	29.77	16.78	0.791269	5.57137	TRINITY_DN20136_c0_g1; TRINITY_DN23856_c2_g16	family C2 unassigned peptidase (C02 family) evidence Inferred from Electronic Annotation
1998	Smp_147010.1	22.72	12.71	0.790875	5.18706	TRINITY_DN23720_c1_g2; TRINITY_DN35470_c0_g1; TRINITY_DN36583_c0_g1; TRINITY_DN62465_c0_g1; TRINITY_DN7653_c0_g1; TRINITY_DN7653_c0_g2	zinc finger protein 425 evidence Inferred from Electronic Annotation
1999	Smp_143240.1	26.75	15.04	0.790814	5.4192	TRINITY_DN11157_c0_g1; TRINITY_DN11157_c1_g1; TRINITY_DN14676_c0_g1; TRINITY_DN14676_c0_g2; TRINITY_DN15095_c0_g1; TRINITY_DN19067_c0_g1; TRINITY_DN19067_c0_g10; TRINITY_DN19067_c0_g11; TRINITY_DN19067_c0_g2; TRINITY_DN19067_c0_g3; TRINITY_DN19067_c0_g4; TRINITY_DN19067_c0_g5; TRINITY_DN19067_c0_g6; TRINITY_DN19067_c0_g7; TRINITY_DN19067_c0_g8; TRINITY_DN19067_c0_g9; TRINITY_DN48764_c0_g1	trafficking protein particle complex subunit 11 evidence Inferred from Electronic Annotation
2000	Smp_048430.1	806.57	465.98	0.790227	10.3146	TRINITY_DN14785_c0_g4; TRINITY_DN21213_c6_g15; TRINITY_DN22244_c0_g1	thioredoxin glutathione reductase db_xref PMID:11985869 evidence Traceable Author Statemen
2001	Smp_084060.1	35.93	20.36	0.789882	5.84021	TRINITY_DN21554_c0_g1	hypothetical protein evidence Inferred from Electronic Annotation
2002	Smp_018940.1	11.15	6.03	0.78936	4.18428	TRINITY_DN18041_c0_g1	calmodulin evidence Inferred from Electronic Annotation
2003	Smp_163290.1	18.49	10.28	0.788967	4.89579	TRINITY_DN11601_c0_g1; TRINITY_DN13387_c0_g1; TRINITY_DN32732_c0_g1	nuclear receptor co repressor related (ncor) evidence Inferred from Electronic Annotation
2004	Smp_194750.1	24.65	13.85	0.788496	5.30378	TRINITY_DN21326_c0_g1	protein SPATIAL evidence Inferred from Electronic Annotation
2006	Smp_054620.1	18.02	10.02	0.787393	4.85997	TRINITY_DN27149_c0_g1; TRINITY_DN40409_c0_g1	amyotrophic lateral sclerosis 2 evidence Inferred from Electronic Annotation
2007	Smp_137230.1	12.96	7.09	0.787087	4.39575	TRINITY_DN11764_c0_g1; TRINITY_DN13793_c0_g1; TRINITY_DN13793_c0_g2; TRINITY_DN61503_c0_g1; TRINITY_DN9932_c0_g2	kinesin protein KIF21A like evidence Inferred from Electronic Annotation
2009	Smp_155620.1	10.05	5.41	0.78565	4.04089	TRINITY_DN23570_c0_g4	hypothetical protein evidence Inferred from Electronic Annotation
2010	Smp_078690.1	21.04	11.79	0.785108	5.08023	TRINITY_DN13018_c0_g1; TRINITY_DN22679_c3_g1; TRINITY_DN22679_c3_g4; TRINITY_DN22679_c3_g5	calponin with UniProtKB:P91888 evidence Non-traceable Author Statemen
2011	Smp_166010.1	46.36	26.49	0.784762	6.20653	TRINITY_DN11703_c0_g1; TRINITY_DN11703_c0_g2; TRINITY_DN14792_c0_g1; TRINITY_DN21222_c0_g1; TRINITY_DN28840_c0_g1; TRINITY_DN43834_c0_g1; TRINITY_DN9558_c0_g1; TRINITY_DN9558_c0_g2	protein phosphatase PP2A regulatory subunit evidence Inferred from Electronic Annotation
2012	Smp_132020.1	82.03	47.21	0.7843	7.02503	TRINITY_DN21790_c0_g2; TRINITY_DN467_c0_g1; TRINITY_DN7491_c0_g1	cell division cycle 20 protein 1 cofactor evidence Inferred from Electronic Annotation
2014	Smp_128750.1	11.98	6.54	0.783654	4.28688	TRINITY_DN13181_c0_g1; TRINITY_DN15405_c0_g1	myosin light chain kinase evidence Inferred from Electronic Annotation
2015	Smp_145670.1	10.48	5.67	0.783364	4.10014	TRINITY_DN18550_c1_g1	SEC63 protein evidence Inferred from Electronic Annotation
2016	Smp_125420.1	35.97	20.48	0.783361	5.84423	TRINITY_DN23768_c0_g4; TRINITY_DN28098_c0_g1; TRINITY_DN49287_c0_g1	corticotropin releasing factor receptor 2 evidence Inferred from Electronic Annotation
2018	Smp_086270.1	61.31	35.21	0.783076	6.60763	TRINITY_DN21419_c0_g1	forkhead box protein J2 evidence Inferred from Electronic Annotation
2019	Smp_068220.1	16.24	9.02	0.782877	4.7148	TRINITY_DN20642_c0_g1; TRINITY_DN3901_c0_g1	helix loop helix zipper protein evidence Inferred from Electronic Annotation
2020	Smp_143660.1	34.4	19.59	0.781806	5.7811	TRINITY_DN17359_c0_g1; TRINITY_DN17888_c0_g1; TRINITY_DN22806_c0_g1	midasin evidence Inferred from Electronic Annotation
2021	Smp_057230.1	36.69	20.94	0.780618	5.87357	TRINITY_DN21658_c0_g1	Seryl tRNA Synthetase evidence Inferred from Electronic Annotation
2022	Smp_242800.1	10.32	5.59	0.780524	4.0798	TRINITY_DN18086_c0_g2	neutral sphingomyelinase evidence Inferred from Electronic Annotation
2024	Smp_123910.1	41.27	23.63	0.779217	6.04221	TRINITY_DN19066_c0_g1	intraflagellar transport protein 20 evidence Inferred from Electronic Annotation
2025	Smp_213670.1	37.85	21.64	0.779041	5.91862	TRINITY_DN19032_c0_g1	hypothetical protein evidence Inferred from Electronic Annotation
2027	Smp_142890.1	10	5.42	0.776858	4.03738	TRINITY_DN23123_c0_g4; TRINITY_DN47606_c0_g1	E3 ubiquitin protein ligase HERC4 evidence Inferred from Electronic Annotation
2028	Smp_002820.3	34.15	19.53	0.775791	5.77294	TRINITY_DN23565_c1_g1	zinc finger CCCH domain containing protein 4 evidence Inferred from Electronic Annotation
2029	Smp_145120.1	60.13	34.71	0.775552	6.58256	TRINITY_DN22199_c0_g2; TRINITY_DN43897_c0_g1	double C2 domains%2C beta evidence Inferred from Electronic Annotation
2030	Smp_141010.1	23.65	13.4	0.775519	5.24982	TRINITY_DN14126_c0_g1; TRINITY_DN17466_c0_g3; TRINITY_DN21393_c0_g2; TRINITY_DN25129_c0_g1; TRINITY_DN42032_c0_g1; TRINITY_DN68858_c0_g1	dysferlin1 evidence Inferred from Electronic Annotation
2031	Smp_055220.3	9.95	5.4	0.774787	4.03122	TRINITY_DN21331_c2_g1	surface protein PspC evidence Inferred from Electronic Annotation
2033	Smp_160620.1	12.18	6.71	0.773548	4.31397	TRINITY_DN15808_c2_g1; TRINITY_DN20308_c1_g2; TRINITY_DN20308_c1_g4; TRINITY_DN21070_c1_g17; TRINITY_DN30565_c0_g1; TRINITY_DN3840_c0_g1; TRINITY_DN64060_c0_g1	subfamily M12B unassigned peptidase evidence Inferred from Electronic Annotation
2034	Smp_126440.1	11.79	6.49	0.771979	4.26903	TRINITY_DN23877_c1_g22	ankyrin repeat domain containing protein 12 evidence Inferred from Electronic Annotation
2035	Smp_018460.1	30.11	17.22	0.771855	5.59485	TRINITY_DN23654_c0_g3; TRINITY_DN23654_c0_g4	Phosphatidylinositol 4 kinase type 2 beta evidence Inferred from Electronic Annotation
2036	Smp_050470.1	23.74	13.49	0.771788	5.25663	TRINITY_DN23632_c0_g1	transducin beta protein 3 like evidence Inferred from Electronic Annotation
2037	Smp_193440.1	86.49	50.27	0.771003	7.10601	TRINITY_DN16198_c0_g2; TRINITY_DN21905_c0_g2; TRINITY_DN23787_c2_g15; TRINITY_DN23787_c2_g6	Cell division cycle and apoptosis regulator evidence Inferred from Electronic Annotation
2038	Smp_057120.1	24.1	13.71	0.77089	5.27836	TRINITY_DN16433_c0_g1; TRINITY_DN37493_c0_g1	PERQ amino acid rich with GYF domain containing protein evidence Inferred from Electronic Annotation
2041	Smp_133600.1	10.27	5.62	0.767584	4.0781	TRINITY_DN11889_c0_g1; TRINITY_DN20726_c0_g2	hypothetical protein evidence Inferred from Electronic Annotation
2042	Smp_245220.1	18.37	10.38	0.767323	4.89482	TRINITY_DN11548_c0_g1; TRINITY_DN23982_c0_g1; TRINITY_DN25945_c0_g1; TRINITY_DN35102_c0_g1; TRINITY_DN53823_c0_g1	dynein beta chain%2C ciliary evidence Inferred from Electronic Annotation
2044	Smp_019990.1	246.54	144.52	0.766444	8.61493	TRINITY_DN16438_c0_g1; TRINITY_DN16438_c0_g2; TRINITY_DN16438_c0_g3; TRINITY_DN16438_c0_g4; TRINITY_DN16438_c0_g5	Clathrin adaptor complex small subunit-like protein with UniProtKB:Q15ES1 evidence Non-traceable Author Statemen
2045	Smp_165850.1	27.13	15.54	0.76615	5.44857	TRINITY_DN18428_c0_g2	long chain fatty acid coenzyme A ligase evidence Inferred from Electronic Annotation
2046	Smp_140690.1	30.68	17.63	0.765945	5.62381	TRINITY_DN21003_c0_g1; TRINITY_DN30666_c0_g1; TRINITY_DN40909_c0_g2	DNA directed RNA polymerase I subunit RPA2 evidence Inferred from Electronic Annotation
2047	Smp_139830.1	16.65	9.38	0.765862	4.75649	TRINITY_DN23238_c0_g1; TRINITY_DN23902_c14_g13	integrin alpha FG GAP repeat containing protein evidence Inferred from Electronic Annotation
2048	Smp_052350.1	10.73	5.9	0.765535	4.13996	TRINITY_DN10829_c0_g1; TRINITY_DN34367_c0_g1; TRINITY_DN45158_c0_g1	zinc finger Ran binding domain containing protein evidence Inferred from Electronic Annotation
2049	Smp_147430.1	16.37	9.22	0.765203	4.73281	TRINITY_DN18655_c0_g2; TRINITY_DN51783_c0_g1; TRINITY_DN62035_c0_g1	Glutamate receptor%2C ionotropic kainate 2 evidence Inferred from Electronic Annotation
2050	Smp_049140.1	50.06	29.05	0.764829	6.32391	TRINITY_DN20631_c0_g2	hypothetical protein evidence Inferred from Electronic Annotation
2051	Smp_131870.1	87.25	50.96	0.764195	7.12112	TRINITY_DN12498_c0_g1; TRINITY_DN12498_c0_g2; TRINITY_DN12498_c0_g3; TRINITY_DN13151_c0_g1; TRINITY_DN22392_c0_g1; TRINITY_DN22392_c0_g2; TRINITY_DN22392_c0_g3	syntaxin binding protein 1 evidence Inferred from Electronic Annotation
2052	Smp_068070.1	105.31	61.6	0.764043	7.39154	TRINITY_DN19683_c1_g4	hypothetical protein evidence Inferred from Electronic Annotation
2055	Smp_174920.1	155.69	91.37	0.762417	7.95455	TRINITY_DN21515_c0_g1	tryptophan hydroxylase db_xref PMID:10419488 evidence Traceable Author Statemen
2056	Smp_049000.1	22.9	13.09	0.762339	5.20906	TRINITY_DN21239_c1_g1	SURP and G patch domain containing protein 1 evidence Inferred from Electronic Annotation
2059	Smp_092500.1	80.99	47.37	0.761335	7.01525	TRINITY_DN22727_c0_g2	thioredoxin domain containing protein 17 evidence Inferred from Electronic Annotation
2060	Smp_166080.1	37.21	21.55	0.760823	5.90111	TRINITY_DN1123_c0_g1; TRINITY_DN18455_c0_g1; TRINITY_DN23232_c0_g1; TRINITY_DN68213_c0_g1	striatin evidence Inferred from Electronic Annotation
2061	Smp_166390.1	36.48	21.12	0.76077	5.87283	TRINITY_DN23323_c3_g2	hypothetical protein evidence Inferred from Electronic Annotation
2062	Smp_133830.1	10.4	5.73	0.760355	4.09845	TRINITY_DN20337_c0_g1	hypothetical protein evidence Inferred from Electronic Annotation
2063	Smp_106110.1	63.31	36.98	0.759803	6.66235	TRINITY_DN21316_c0_g1; TRINITY_DN21316_c0_g6; TRINITY_DN58098_c0_g1	Kv channel interacting protein 4 evidence Inferred from Electronic Annotation
2065	Smp_141630.2	99.48	58.4	0.758374	7.31179	TRINITY_DN21969_c0_g1; TRINITY_DN23217_c2_g1	splicing factor 3b subunit 1 evidence Inferred from Electronic Annotation
2067	Smp_172580.1	54.64	31.91	0.757596	6.45204	TRINITY_DN21484_c0_g1; TRINITY_DN8393_c0_g1; TRINITY_DN9480_c0_g2	docking protein 3 evidence Inferred from Electronic Annotation
2069	Smp_035620.1	139.35	82.05	0.756977	7.79701	TRINITY_DN20040_c0_g2	Protein FAM125B evidence Inferred from Electronic Annotation
2070	Smp_159730.2	132.97	78.36	0.755426	7.73016	TRINITY_DN14698_c0_g1; TRINITY_DN18263_c0_g1; TRINITY_DN18263_c0_g2	protein kinase evidence Inferred from Electronic Annotation
2072	Smp_079700.1	28.3	16.38	0.753473	5.51349	TRINITY_DN22841_c0_g2	GA binding protein subunit beta 2 evidence Inferred from Electronic Annotation
2073	Smp_127120.1	42.14	24.59	0.753446	6.08172	TRINITY_DN23848_c0_g3; TRINITY_DN42705_c0_g1	ATP dependent RNA helicase DDX10 evidence Inferred from Electronic Annotation,term Has1 evidence Inferred from Electronic Annotation
2074	Smp_072560.1	26.36	15.24	0.752517	5.41278	TRINITY_DN15383_c0_g1; TRINITY_DN25923_c0_g2	hypothetical protein evidence Inferred from Electronic Annotation
2075	Smp_244760.1	52.74	30.9	0.75244	6.40327	TRINITY_DN16400_c0_g2; TRINITY_DN16400_c0_g3; TRINITY_DN16400_c0_g7; TRINITY_DN18341_c0_g1; TRINITY_DN23463_c0_g3	syntaxin binding protein 5 evidence Inferred from Electronic Annotation
2076	Smp_024810.1	37.65	21.95	0.751974	5.92125	TRINITY_DN22347_c0_g1	Protein FAM82B evidence Inferred from Electronic Annotation
2077	Smp_144700.1	17.86	10.2	0.751831	4.86096	TRINITY_DN21687_c0_g1; TRINITY_DN21687_c1_g2	5' AMP activated protein kinase subunit gamma evidence Inferred from Electronic Annotation
2078	Smp_137150.1	15.78	8.98	0.749631	4.68706	TRINITY_DN18700_c0_g1	beta mannosidase evidence Inferred from Electronic Annotation
2079	Smp_102840.1	149.7	88.63	0.749626	7.90286	TRINITY_DN19514_c0_g1; TRINITY_DN19514_c0_g3; TRINITY_DN19514_c0_g4	28S ribosomal protein S2%2C mitochondrial evidence Inferred from Electronic Annotation
2081	Smp_133860.1	18.14	10.39	0.748823	4.88411	TRINITY_DN19611_c0_g1	Mediator of RNA polymerase II transcription evidence Inferred from Electronic Annotation
2082	Smp_002840.1	37.33	21.81	0.748808	5.91025	TRINITY_DN22953_c0_g1	hypothetical protein evidence Inferred from Electronic Annotation
2083	Smp_214100.1	56.77	33.38	0.748751	6.51017	TRINITY_DN23761_c1_g1	-
2084	Smp_062720.1	85.82	50.71	0.747584	7.1036	TRINITY_DN23730_c0_g3	e1b 55 kda associated protein evidence Inferred from Electronic Annotation
2085	Smp_173280.1	112.27	66.58	0.745098	7.49065	TRINITY_DN19025_c0_g1; TRINITY_DN20608_c0_g1	peptidyl prolyl cis trans isomerase H with UniProtKB:Q15ER6 evidence Non-traceable Author Statemen
2086	Smp_243590.1	21.93	12.69	0.744114	5.15462	TRINITY_DN13915_c0_g1; TRINITY_DN13915_c0_g2; TRINITY_DN19478_c0_g1; TRINITY_DN19478_c0_g2; TRINITY_DN19478_c0_g3; TRINITY_DN7668_c0_g1	ankyrin 2%2C3:unc44 evidence Inferred from Electronic Annotation
2087	Smp_020450.1	18.75	10.8	0.743066	4.9331	TRINITY_DN20229_c0_g1; TRINITY_DN23896_c5_g19; TRINITY_DN23896_c5_g32	UBX domain containing protein 6 evidence Inferred from Electronic Annotation
2089	Smp_136300.1	9.62	5.35	0.741955	3.99729	TRINITY_DN12201_c0_g1; TRINITY_DN18702_c0_g1; TRINITY_DN18702_c0_g2; TRINITY_DN18702_c1_g1	tyrosine kinase%2C TK group%2C Src family db_xref PMID:11289068 evidence Traceable Author Statemen
2090	Smp_134530.1	23.63	13.73	0.741659	5.26153	TRINITY_DN22191_c0_g1; TRINITY_DN23825_c0_g1; TRINITY_DN26178_c0_g1	Solute carrier organic anion transporter family evidence Inferred from Electronic Annotation
2091	Smp_146400.1	66.8	39.55	0.741583	6.74618	TRINITY_DN10741_c0_g1; TRINITY_DN21317_c0_g2; TRINITY_DN54185_c0_g1; TRINITY_DN7304_c0_g1	syntaxin binding protein 1 evidence Inferred from Electronic Annotation
2092	Smp_014170.1	13.34	7.58	0.740995	4.45418	TRINITY_DN21072_c0_g2	serine:threonine protein kinase evidence Inferred from Electronic Annotation
2093	Smp_050730.1	20.99	12.16	0.740688	5.09381	TRINITY_DN17481_c0_g1	elongator complex protein 2 evidence Inferred from Electronic Annotation
2094	Smp_094760.1	24.33	14.16	0.740577	5.30342	TRINITY_DN18579_c0_g1	cyclin dependent kinase 9 evidence Inferred from Electronic Annotation
2095	Smp_095910.1	137.56	81.93	0.740545	7.78457	TRINITY_DN21379_c0_g1	signal recognition particle receptor subunit evidence Inferred from Electronic Annotation
2097	Smp_164150.1	15.07	8.63	0.738762	4.62644	TRINITY_DN16828_c0_g2; TRINITY_DN35169_c0_g1; TRINITY_DN48499_c0_g1	tau tubulin kinase 1 evidence Inferred from Electronic Annotation
2098	Smp_210680.1	156.72	93.53	0.738521	7.97298	TRINITY_DN19239_c0_g1	cell differentiation protein rcd1 evidence Inferred from Electronic Annotation
2099	Smp_069600.1	22.54	13.11	0.738396	5.19574	TRINITY_DN16773_c0_g1; TRINITY_DN16773_c0_g2	ATP dependent DNA helicase Q4 evidence Inferred from Electronic Annotation
2100	Smp_087930.1	34.05	20.03	0.736966	5.78346	TRINITY_DN23013_c0_g1; TRINITY_DN23511_c0_g3	ATP binding cassette sub family B evidence Inferred from Electronic Annotation
2101	Smp_172910.1	23.16	13.53	0.733586	5.23611	TRINITY_DN18989_c0_g1; TRINITY_DN23233_c4_g27; TRINITY_DN23233_c4_g4; TRINITY_DN23233_c4_g6; TRINITY_DN23233_c4_g9; TRINITY_DN23666_c0_g1; TRINITY_DN24697_c0_g1; TRINITY_DN58355_c0_g1	Protein phosphatase PP2A 55 kDa regulatory evidence Inferred from Electronic Annotation
2102	Smp_027750.1	23.89	13.99	0.731566	5.28096	TRINITY_DN22698_c0_g1	kinesin protein KIF21A evidence Inferred from Electronic Annotation
2103	Smp_039750.1	11.34	6.44	0.729968	4.23113	TRINITY_DN23083_c0_g1; TRINITY_DN23765_c2_g27; TRINITY_DN23882_c0_g3; TRINITY_DN4266_c0_g1	glycogen phosphorylase evidence Inferred from Electronic Annotation
2105	Smp_091390.1	48.83	29.06	0.72917	6.30177	TRINITY_DN22092_c1_g1	hypothetical protein evidence Inferred from Electronic Annotation
2106	Smp_135920.1	13.21	7.58	0.727857	4.44559	TRINITY_DN10081_c0_g1; TRINITY_DN10081_c0_g2; TRINITY_DN10081_c0_g3	centrosomal protein of 164 kDa evidence Inferred from Electronic Annotation
2108	Smp_243140.2	82.27	49.29	0.727525	7.0505	TRINITY_DN20397_c0_g1	Glutaredoxin protein 5 evidence Inferred from Electronic Annotation
2109	Smp_042630.1	64.12	38.33	0.727471	6.69279	TRINITY_DN22583_c7_g1	methyltransferase protein 6 like evidence Inferred from Electronic Annotation
2110	Smp_162620.1	13.52	7.77	0.727393	4.47832	TRINITY_DN20502_c0_g1	dimethyladenosine transferase 1%2C mitochondrial evidence Inferred from Electronic Annotation
2112	Smp_105020.1	61.57	36.81	0.726703	6.63488	TRINITY_DN11607_c0_g1; TRINITY_DN16837_c0_g1; TRINITY_DN16971_c0_g1	titin evidence Inferred from Electronic Annotation
2113	Smp_009990.1	33.87	20.08	0.726111	5.78005	TRINITY_DN11567_c0_g1; TRINITY_DN21723_c0_g1; TRINITY_DN62606_c0_g1	Receptor protein-tyrosine kinase db_xref PMID:17181541 evidence Traceable Author Statemen
2114	Smp_093100.1	592.36	357.74	0.725969	9.89345	TRINITY_DN21654_c0_g2; TRINITY_DN6785_c0_g1	splicing factor u2af 35 kda subunit evidence Inferred from Electronic Annotation
2115	Smp_087810.1	60.48	36.18	0.72559	6.6097	TRINITY_DN14940_c0_g2; TRINITY_DN20778_c2_g13; TRINITY_DN23517_c0_g1; TRINITY_DN23517_c0_g2; TRINITY_DN23517_c0_g4; TRINITY_DN23882_c0_g10; TRINITY_DN23882_c0_g11; TRINITY_DN23882_c0_g23; TRINITY_DN23882_c0_g35; TRINITY_DN23882_c0_g9; TRINITY_DN23895_c6_g3; TRINITY_DN23895_c6_g4; TRINITY_DN881_c0_g1	nucleolar GTP binding protein 2 evidence Inferred from Electronic Annotation
2116	Smp_018260.1	18.36	10.71	0.725338	4.91025	TRINITY_DN19407_c0_g1; TRINITY_DN19407_c0_g3	glycogen synthase evidence Inferred from Electronic Annotation
2118	Smp_010100.1	59.21	35.48	0.722897	6.5803	TRINITY_DN18909_c0_g1; TRINITY_DN18909_c0_g2	ank 1 term lipoic acid synthetase evidence Inferred from Electronic Annotation,term lipoyl synthase%2C mitochondrial with UniProtKB:C4PZQ3 evidence Inferred from Sequence or Structural Similarity
2119	Smp_158030.4	28.26	16.73	0.722737	5.52325	TRINITY_DN19147_c0_g2	vacuolar fusion protein CCZ1 evidence Inferred from Electronic Annotation
2120	Smp_206170.1	15.33	8.9	0.722024	4.65707	TRINITY_DN23103_c0_g2	WD repeat containing protein 48 evidence Inferred from Electronic Annotation
2122	Smp_170060.1	16.22	9.45	0.720582	4.73715	TRINITY_DN15434_c0_g1; TRINITY_DN15434_c0_g2	negative elongation factor D evidence Inferred from Electronic Annotation
2123	Smp_166220.1	19	11.15	0.719044	4.96116	TRINITY_DN23810_c0_g3; TRINITY_DN23885_c3_g29	SUMO activating enzyme subunit 2 evidence Inferred from Electronic Annotation
2124	Smp_213270.1	46.22	27.72	0.717342	6.22766	TRINITY_DN16463_c0_g2; TRINITY_DN16463_c0_g3	GOLGI SNAP receptor complex member%2C putative evidence Inferred from Electronic Annotation
2125	Smp_079840.1	23.27	13.77	0.716504	5.24945	TRINITY_DN20304_c0_g1; TRINITY_DN69579_c0_g1	uroporphyrinogen III synthase evidence Inferred from Electronic Annotation
2126	Smp_136280.1	77.29	46.7	0.714839	6.96567	TRINITY_DN22909_c0_g2; TRINITY_DN23289_c0_g7; TRINITY_DN44558_c0_g1; TRINITY_DN44558_c0_g2	regulator of telomere elongation helicase 1 evidence Inferred from Electronic Annotation
2128	Smp_137710.1	44.37	26.65	0.714459	6.17033	TRINITY_DN22210_c0_g2	major facilitator superfamily domain containing protein evidence Inferred from Electronic Annotation
2130	Smp_150930.1	25.85	15.37	0.713868	5.39985	TRINITY_DN19058_c0_g1	Alkylated repair protein alkB 7 evidence Inferred from Electronic Annotation
2131	Smp_128920.1	9.94	5.67	0.713854	4.05398	TRINITY_DN11636_c0_g1; TRINITY_DN13027_c0_g1; TRINITY_DN16569_c0_g1; TRINITY_DN54386_c0_g1	spectrin beta chain evidence Inferred from Electronic Annotation
2134	Smp_008230.1	109.86	66.6	0.713644	7.47135	TRINITY_DN15256_c0_g1	ras protein Rab 18 evidence Inferred from Electronic Annotation
2135	Smp_211090.1	42.58	25.58	0.713325	6.11187	TRINITY_DN19544_c0_g1	peptide chain release factor 1 evidence Inferred from Electronic Annotation
2136	Smp_133350.1	81.77	49.49	0.71311	7.04723	TRINITY_DN23764_c0_g1; TRINITY_DN39637_c0_g1	nucleolar gtp binding protein evidence Inferred from Electronic Annotation
2137	Smp_156410.1	31.42	18.78	0.712842	5.67807	TRINITY_DN23246_c0_g3	protein spinster evidence Inferred from Electronic Annotation
2138	Smp_059210.1	106.19	64.46	0.711485	7.42333	TRINITY_DN22967_c0_g4	hypothetical protein evidence Inferred from Electronic Annotation
2143	Smp_081720.1	9.98	5.73	0.7062	4.06264	TRINITY_DN14886_c0_g3; TRINITY_DN16918_c0_g1; TRINITY_DN43305_c0_g1	transmembrane protein 231 evidence Inferred from Electronic Annotation
2145	Smp_147330.1	11.83	6.87	0.705086	4.30012	TRINITY_DN21768_c0_g1; TRINITY_DN23902_c14_g25	DEAH (Asp Glu Ala His) box polypeptide 34 evidence Inferred from Electronic Annotation
2146	Smp_144940.1	10.02	5.76	0.705029	4.06867	TRINITY_DN1639_c0_g1; TRINITY_DN21459_c0_g2	RUN domain containing protein 3B evidence Inferred from Electronic Annotation
2148	Smp_000755.1	26.99	16.21	0.701664	5.46597	TRINITY_DN22913_c0_g1; TRINITY_DN23536_c2_g3; TRINITY_DN60670_c0_g1	family M13 non peptidase ue (M13 family) evidence Inferred from Electronic Annotation
2149	Smp_146490.1	27.72	16.67	0.700754	5.5043	TRINITY_DN19937_c0_g1; TRINITY_DN19937_c0_g2	transmembrane protein 164 evidence Inferred from Electronic Annotation
2150	Smp_123440.1	56.18	34.19	0.700345	6.51365	TRINITY_DN23600_c1_g1	cytoplasm protein evidence Inferred from Electronic Annotation
2151	Smp_029160.1	39.71	24.07	0.699421	6.01748	TRINITY_DN22130_c0_g1	protein serac1 evidence Inferred from Electronic Annotation
2152	Smp_023270.1	42.31	25.68	0.698942	6.10832	TRINITY_DN18240_c0_g1; TRINITY_DN44034_c0_g1	RNA binding protein 40 evidence Inferred from Electronic Annotation
2153	Smp_211050.1	66.82	40.78	0.698898	6.76288	TRINITY_DN19069_c0_g1; TRINITY_DN21772_c0_g2; TRINITY_DN32806_c0_g1; TRINITY_DN32806_c0_g2	acylamino acid releasing enzyme evidence Inferred from Electronic Annotation
2154	Smp_007260.2	40.13	24.34	0.698775	6.03276	TRINITY_DN22443_c1_g1	sarco:endoplasmic reticulum calcium ATPase evidence Inferred from Electronic Annotation
2156	Smp_105410.1	18.54	11.04	0.698595	4.93452	TRINITY_DN23188_c0_g1	glucose transport protein db_xref PMID:8307988 evidence Traceable Author Statemen
2157	Smp_051210.1	59.59	36.35	0.697971	6.59902	TRINITY_DN22187_c0_g4	importin alpha 34 evidence Inferred from Electronic Annotation
2158	Smp_129210.1	56.06	34.18	0.697724	6.51159	TRINITY_DN20662_c0_g2; TRINITY_DN23813_c0_g1	tyrosyl tRNA synthetase evidence Inferred from Electronic Annotation
2159	Smp_154640.1	42.04	25.55	0.696966	6.09993	TRINITY_DN22284_c0_g1	SWI:SNF matrix associated evidence Inferred from Electronic Annotation
2161	Smp_243300.1	37.01	22.46	0.696176	5.91815	TRINITY_DN22012_c0_g3	peter pan evidence Inferred from Electronic Annotation
2162	Smp_063000.1	13.32	7.84	0.695913	4.46989	TRINITY_DN14561_c0_g1; TRINITY_DN22245_c0_g1; TRINITY_DN68351_c0_g1	smdr1 db_xref PMID:7969275 evidence Traceable Author Statemen
2164	Smp_123830.1	15.32	9.08	0.695145	4.66676	TRINITY_DN23348_c0_g1; TRINITY_DN32694_c0_g1; TRINITY_DN56805_c0_g1	collagen alpha (xi) chain evidence Inferred from Electronic Annotation
2166	Smp_130330.1	101.48	62.33	0.694381	7.36466	TRINITY_DN12340_c0_g1; TRINITY_DN12340_c0_g2; TRINITY_DN15136_c1_g1; TRINITY_DN23264_c0_g1; TRINITY_DN5431_c0_g1; TRINITY_DN5431_c0_g2	hypothetical protein evidence Inferred from Electronic Annotation
2167	Smp_245730.1	18.02	10.76	0.693629	4.89627	TRINITY_DN16638_c0_g1	GPI mannosyltransferase 4 with InterPro:IPR005599 evidence Inferred from Sequence Model
2168	Smp_034670.1	15.04	8.93	0.691809	4.64212	TRINITY_DN20848_c0_g1	tubulin gamma 1 chain evidence Inferred from Electronic Annotation
2169	Smp_008660.2	51.63	31.6	0.691013	6.39626	TRINITY_DN18117_c0_g2	gelsolin evidence Inferred from Electronic Annotation
2170	Smp_046140.1	46.26	28.29	0.690211	6.23936	TRINITY_DN16426_c0_g1; TRINITY_DN23738_c0_g2; TRINITY_DN52700_c0_g1	nuclear receptor binding protein evidence Inferred from Electronic Annotation
2171	Smp_063180.1	45.58	27.92	0.687643	6.21917	TRINITY_DN23808_c0_g1	hypothetical protein evidence Inferred from Electronic Annotation
2172	Smp_142970.1	46.78	28.68	0.686916	6.25663	TRINITY_DN16692_c0_g1	palmitoyl protein thioesterase 1 evidence Inferred from Electronic Annotation
2174	Smp_214350.1	28.22	17.16	0.686192	5.53543	TRINITY_DN23276_c0_g1; TRINITY_DN42177_c0_g1; TRINITY_DN6139_c0_g1	acyl CoA:glycerol 3 phosphate acyltransferase evidence Inferred from Electronic Annotation
2175	Smp_105960.1	23.82	14.43	0.685765	5.29462	TRINITY_DN23234_c1_g1; TRINITY_DN6593_c1_g1	dnaj subfamily c evidence Inferred from Electronic Annotation
2176	Smp_089840.1	124.56	77.08	0.685352	7.66278	TRINITY_DN17379_c0_g2	histone H2A evidence Inferred from Electronic Annotation
2177	Smp_071140.1	54.83	33.72	0.685274	6.48462	TRINITY_DN22599_c0_g1; TRINITY_DN8831_c0_g2	adducin related protein evidence Inferred from Electronic Annotation
2178	Smp_208050.1	48.43	29.74	0.68527	6.30688	TRINITY_DN19923_c0_g1	histidine triad nucleotide binding protein evidence Inferred from Electronic Annotation
2179	Smp_210440.1	29.1	17.72	0.685183	5.57954	TRINITY_DN19531_c0_g1; TRINITY_DN19531_c0_g2	4 trimethylaminobutyraldehyde dehydrogenase evidence Inferred from Electronic Annotation
2180	Smp_162710.1	42.35	25.97	0.684676	6.1152	TRINITY_DN22041_c1_g1	serine:threonine protein kinase 6 evidence Inferred from Electronic Annotation
2181	Smp_122030.1	20.7	12.51	0.683667	5.09635	TRINITY_DN23540_c0_g2	endophilin A2 evidence Inferred from Electronic Annotation
2183	Smp_162210.1	47.96	29.5	0.682794	6.29389	TRINITY_DN21563_c0_g1	transmembrane protein 68 evidence Inferred from Electronic Annotation
2185	Smp_078270.1	15.48	9.27	0.68228	4.6865	TRINITY_DN12740_c0_g1; TRINITY_DN12740_c0_g2	mps one binder kinase activator 2 like evidence Inferred from Electronic Annotation
2187	Smp_178490.1	16.31	9.79	0.681911	4.76022	TRINITY_DN22853_c0_g1	udp sugar transporter ustc udp glucuronic acid udp acetylgalactosamine evidence Inferred from Electronic Annotation
2188	Smp_213150.1	39.44	24.21	0.681787	6.01458	TRINITY_DN18368_c0_g1; TRINITY_DN18368_c0_g2; TRINITY_DN18368_c0_g3; TRINITY_DN25142_c0_g1; TRINITY_DN5875_c1_g1	ribonucleases P:MRP protein subunit POP1 evidence Inferred from Electronic Annotation
2189	Smp_128120.1	47.56	29.28	0.681403	6.28244	TRINITY_DN14113_c0_g1; TRINITY_DN20754_c0_g1; TRINITY_DN24861_c0_g1; TRINITY_DN4795_c0_g1; TRINITY_DN67174_c0_g1	protein polybromo 1 evidence Inferred from Electronic Annotation
2190	Smp_061920.2	79.41	49.19	0.679975	7.01792	TRINITY_DN20209_c0_g6	uv excision repair protein rad23 b evidence Inferred from Electronic Annotation
2191	Smp_175550.1	195.11	121.41	0.679942	8.3107	TRINITY_DN17477_c0_g1	U6 snRNA associated Sm protein LSm8 evidence Inferred from Electronic Annotation
2192	Smp_020400.1	33.39	20.47	0.679667	5.77768	TRINITY_DN20552_c0_g1	zinc metalloproteinase YIL108W evidence Inferred from Electronic Annotation
2194	Smp_085790.2	25.67	15.66	0.678829	5.40361	TRINITY_DN21306_c0_g1	hypothetical protein evidence Inferred from Electronic Annotation
2195	Smp_081190.1	37.26	22.9	0.678826	5.93452	TRINITY_DN17867_c0_g3	GTP binding protein rhoA evidence Inferred from Electronic Annotation
2196	Smp_148360.1	13.69	8.18	0.678268	4.51538	TRINITY_DN12156_c0_g1; TRINITY_DN20630_c0_g1	SET domain containing protein with InterPro:IPR001214 evidence Inferred from Sequence Model
2197	Smp_132900.1	17.85	10.78	0.678225	4.88899	TRINITY_DN18673_c0_g2; TRINITY_DN18673_c0_g3	myo inositol monophosphatase evidence Inferred from Electronic Annotation
2199	Smp_055130.2	30.94	18.98	0.676808	5.67016	TRINITY_DN23089_c0_g2	pleckstrin y domain containing family F evidence Inferred from Electronic Annotation
2200	Smp_038830.1	18.57	11.25	0.675862	4.94579	TRINITY_DN23153_c0_g1; TRINITY_DN23153_c0_g2; TRINITY_DN23153_c3_g1	abhydrolase domain containing protein evidence Inferred from Electronic Annotation
2201	Smp_162220.2	78.55	48.81	0.675427	7.00405	TRINITY_DN11126_c0_g1; TRINITY_DN23583_c0_g1; TRINITY_DN23583_c0_g2	-
2202	Smp_174410.1	12.75	7.61	0.675346	4.41684	TRINITY_DN22265_c0_g1	hypothetical protein evidence Inferred from Electronic Annotation
2203	Smp_163620.1	36.97	22.78	0.675111	5.92481	TRINITY_DN20699_c0_g1; TRINITY_DN36217_c0_g1; TRINITY_DN6802_c0_g1	dna helicase ino80 evidence Inferred from Electronic Annotation
2204	Smp_077670.1	22.16	13.53	0.672601	5.19731	TRINITY_DN23505_c0_g2	tRNA guanosine 2' O methyltransferase TRM11 evidence Inferred from Electronic Annotation
2205	Smp_005020.1	30.62	18.84	0.672425	5.65707	TRINITY_DN23843_c0_g2	E3 ubiquitin protein ligase CBL B evidence Inferred from Electronic Annotation
2206	Smp_154280.1	13.66	8.2	0.672179	4.51475	TRINITY_DN13734_c0_g1; TRINITY_DN13734_c0_g2; TRINITY_DN13734_c0_g3; TRINITY_DN13734_c0_g4; TRINITY_DN13734_c0_g5; TRINITY_DN22960_c1_g1; TRINITY_DN22960_c1_g2	hypothetical protein evidence Inferred from Electronic Annotation
2207	Smp_133120.2	225.05	140.97	0.671056	8.51971	TRINITY_DN22143_c0_g2; TRINITY_DN22143_c0_g3	DEAD box ATP dependent RNA helicase evidence Inferred from Electronic Annotation
2208	Smp_012810.1	12.29	7.35	0.670493	4.36737	TRINITY_DN22397_c0_g1	Four and a half LIM domains protein 3 evidence Inferred from Electronic Annotation
2209	Smp_210900.3	43.61	27.03	0.670395	6.16269	TRINITY_DN14157_c0_g1; TRINITY_DN23562_c0_g1	-
2210	Smp_022400.1	102.98	64.42	0.668502	7.39575	TRINITY_DN22161_c0_g1	glucose 6 phosphate isomerase evidence Inferred from Electronic Annotation
2211	Smp_023670.1	78.68	49.15	0.667968	7.00932	TRINITY_DN17682_c0_g1	partner dicer db_xref PMID:19007911 evidence Traceable Author Statemen
2212	Smp_150960.1	14.1	8.51	0.667031	4.56133	TRINITY_DN1603_c0_g1; TRINITY_DN20728_c0_g1; TRINITY_DN40013_c0_g1; TRINITY_DN67569_c0_g1	mau2 chromatid cohesion factor evidence Inferred from Electronic Annotation
2213	Smp_136780.1	63.76	39.81	0.66618	6.70833	TRINITY_DN22857_c0_g1	Transmembrane and ubiquitin domain evidence Inferred from Electronic Annotation
2214	Smp_041480.3	158.97	99.82	0.66602	8.0212	TRINITY_DN22788_c0_g1	rna recognition motif (rrm) domain containing protein evidence Inferred from Electronic Annotation
2215	Smp_137430.1	36.17	22.44	0.665166	5.89748	TRINITY_DN11386_c0_g1; TRINITY_DN22461_c0_g1	splicing factor 3b subunit 3 evidence Inferred from Electronic Annotation
2217	Smp_085910.1	26.01	16.04	0.664568	5.42794	TRINITY_DN14038_c0_g1; TRINITY_DN24276_c0_g1; TRINITY_DN40571_c0_g1	smad family member 2 db_xref PMID:11152451 evidence Traceable Author Statemen
2218	Smp_213800.1	19.19	11.74	0.664276	4.99684	TRINITY_DN21921_c0_g1; TRINITY_DN51813_c0_g1; TRINITY_DN68834_c0_g1	ATP dependent RNA helicase DDX55 evidence Inferred from Electronic Annotation
2220	Smp_036920.1	544.96	343.65	0.663663	9.79703	TRINITY_DN19383_c0_g1	chromatin accessibility complex protein 1 evidence Inferred from Electronic Annotation
2222	Smp_087250.1	142.27	89.52	0.662428	7.86289	TRINITY_DN1065_c0_g1; TRINITY_DN11438_c0_g1; TRINITY_DN11438_c0_g2; TRINITY_DN11438_c0_g3	muscle LIM protein evidence Inferred from Electronic Annotation
2225	Smp_144590.1	15.55	9.48	0.659193	4.7021	TRINITY_DN13165_c0_g1; TRINITY_DN14425_c0_g1; TRINITY_DN23303_c3_g4; TRINITY_DN64400_c0_g1; TRINITY_DN7390_c0_g1	ras gtpase activating protein evidence Inferred from Electronic Annotation
2226	Smp_043200.1	45.46	28.44	0.658211	6.22689	TRINITY_DN22175_c0_g3	serine:threonine protein kinase rio2 evidence Inferred from Electronic Annotation
2227	Smp_147680.1	68.05	42.8	0.656711	6.80542	TRINITY_DN11721_c0_g1; TRINITY_DN21381_c0_g1	DNA supercoiling factor evidence Inferred from Electronic Annotation
2228	Smp_082780.1	31.66	19.74	0.655109	5.71149	TRINITY_DN15985_c0_g1; TRINITY_DN16049_c0_g1; TRINITY_DN16049_c0_g2; TRINITY_DN16049_c0_g3	wiskott Aldrich syndrome protein evidence Inferred from Electronic Annotation
2229	Smp_056390.1	18.26	11.24	0.654004	4.93074	TRINITY_DN22139_c0_g1	hypothetical protein evidence Inferred from Electronic Annotation
2230	Smp_125020.1	158.68	100.48	0.653988	8.02326	TRINITY_DN15428_c0_g1	dynein light chain evidence Inferred from Electronic Annotation
2233	Smp_143760.1	49.21	30.94	0.65261	6.34252	TRINITY_DN18264_c0_g1; TRINITY_DN22673_c0_g2; TRINITY_DN22673_c0_g7	DNA repair protein REV1 evidence Inferred from Electronic Annotation
2235	Smp_153770.1	13.8	8.42	0.651798	4.5373	TRINITY_DN18592_c0_g1; TRINITY_DN18592_c0_g2; TRINITY_DN18592_c0_g3	dna repair endonuclease xpf evidence Inferred from Electronic Annotation
2236	Smp_241980.1	24.02	14.93	0.651336	5.32012	TRINITY_DN10864_c0_g1; TRINITY_DN13059_c0_g1; TRINITY_DN16948_c0_g1; TRINITY_DN18302_c0_g2; TRINITY_DN46493_c0_g1; TRINITY_DN7202_c0_g2	dedicator of cytokinesis protein evidence Inferred from Electronic Annotation
2237	Smp_059150.1	66.71	42.12	0.651012	6.77913	TRINITY_DN22643_c0_g2; TRINITY_DN35439_c0_g1	Mitochondrial inner membrane protein evidence Inferred from Electronic Annotation
2238	Smp_213610.1	75.7	47.89	0.649687	6.96104	TRINITY_DN11971_c0_g1; TRINITY_DN11971_c0_g2; TRINITY_DN13511_c1_g1; TRINITY_DN14218_c0_g1; TRINITY_DN19811_c0_g1; TRINITY_DN20041_c0_g1; TRINITY_DN51179_c0_g1	hypothetical protein evidence Inferred from Electronic Annotation
2240	Smp_176620.1	50.93	32.12	0.648866	6.39318	TRINITY_DN19010_c0_g1; TRINITY_DN22212_c4_g15; TRINITY_DN22552_c0_g2; TRINITY_DN22552_c0_g3	cyclin dependent kinase 11 evidence Inferred from Electronic Annotation
2241	Smp_198870.1	27.78	17.36	0.648501	5.52795	TRINITY_DN23737_c0_g2	long chain fatty acid coenzyme A ligase evidence Inferred from Electronic Annotation
2242	Smp_019630.1	24.66	15.37	0.648467	5.35861	TRINITY_DN18953_c0_g1	aminoacylase (M20 family) evidence Inferred from Electronic Annotation
2243	Smp_075370.1	19.53	12.1	0.648167	5.02813	TRINITY_DN22271_c0_g1	hypothetical protein evidence Inferred from Electronic Annotation
2244	Smp_172730.1	16.97	10.47	0.647725	4.82985	TRINITY_DN19434_c0_g1	Fatty aldehyde dehydrogenase evidence Inferred from Electronic Annotation
2245	Smp_123420.1	32.95	20.67	0.647712	5.77136	TRINITY_DN19995_c0_g1; TRINITY_DN5483_c0_g1; TRINITY_DN5483_c0_g2	aryl hydrocarbon receptor nuclear translocator evidence Inferred from Electronic Annotation
2246	Smp_126630.1	23.2	14.47	0.645534	5.27314	TRINITY_DN10280_c0_g1; TRINITY_DN21035_c0_g1; TRINITY_DN5254_c0_g1	hypothetical protein evidence Inferred from Electronic Annotation
2247	Smp_213810.1	21.51	13.39	0.645499	5.16591	TRINITY_DN18080_c0_g1; TRINITY_DN8885_c0_g1	centromere:kinetochore protein zw10 evidence Inferred from Electronic Annotation
2248	Smp_099310.1	38.1	24.01	0.644664	5.9798	TRINITY_DN23676_c1_g2; TRINITY_DN23676_c1_g5; TRINITY_DN38094_c0_g1; TRINITY_DN8168_c0_g1	protein transport protein SEC23 evidence Inferred from Electronic Annotation
2250	Smp_131000.1	14.85	9.15	0.643003	4.64386	TRINITY_DN22848_c0_g1; TRINITY_DN5398_c0_g1	SWI:SNF related%2C matrix associated%2C actin evidence Inferred from Electronic Annotation
2251	Smp_083870.1	140.27	89.54	0.641828	7.85056	TRINITY_DN16096_c0_g2; TRINITY_DN18202_c0_g1; TRINITY_DN22765_c5_g1	leucine aminopeptidase 2 with UniProtKB:D6BNU5 evidence Non-traceable Author Statemen
2252	Smp_212020.1	16.97	10.52	0.64145	4.83238	TRINITY_DN22915_c1_g1; TRINITY_DN22915_c1_g2; TRINITY_DN22915_c1_g3	sterol response element binding protein evidence Inferred from Electronic Annotation
2253	Smp_000200.1	22.14	13.84	0.640898	5.20867	TRINITY_DN17134_c0_g1	NEDD4 binding protein 2 2 evidence Inferred from Electronic Annotation
2254	Smp_169180.1	65.06	41.38	0.640393	6.74739	TRINITY_DN11335_c0_g2; TRINITY_DN18836_c0_g2; TRINITY_DN38768_c0_g1; TRINITY_DN56721_c0_g1; TRINITY_DN65787_c0_g1; TRINITY_DN68114_c0_g1	E3 ubiquitin protein ligase HECTD1 evidence Inferred from Electronic Annotation
2255	Smp_140600.1	40.66	25.74	0.639663	6.07468	TRINITY_DN22056_c1_g1; TRINITY_DN23864_c5_g4	protein jagged 1 evidence Inferred from Electronic Annotation
2256	Smp_214080.1	73.39	46.75	0.639608	6.92053	TRINITY_DN21064_c0_g1; TRINITY_DN23303_c3_g5; TRINITY_DN2703_c0_g1	Zinc finger%2C C2H2 type domain containing protein evidence Inferred from Electronic Annotation
2257	Smp_151410.1	16.49	10.24	0.637888	4.79338	TRINITY_DN19011_c0_g1; TRINITY_DN42790_c0_g1; TRINITY_DN57051_c0_g1	protein phosphatase 7 evidence Inferred from Electronic Annotation
2258	Smp_021830.1	72.63	46.34	0.637234	6.90653	TRINITY_DN20335_c2_g1; TRINITY_DN20922_c0_g1	phosphatidylserine decarboxylase proenzyme 1
2259	Smp_164290.1	55.45	35.3	0.637004	6.51964	TRINITY_DN23806_c0_g2; TRINITY_DN23806_c0_g3; TRINITY_DN23806_c0_g4	WD repeat containing protein 55 evidence Inferred from Electronic Annotation
2260	Smp_020060.1	167.58	107.43	0.636669	8.10858	TRINITY_DN10773_c0_g1; TRINITY_DN11309_c0_g1; TRINITY_DN12797_c0_g1; TRINITY_DN12797_c0_g2; TRINITY_DN16688_c0_g1; TRINITY_DN16688_c0_g2	nudC domain containing protein 1 evidence Inferred from Electronic Annotation
2261	Smp_138860.1	14.26	8.83	0.634492	4.59036	TRINITY_DN21254_c0_g1; TRINITY_DN41629_c0_g1	AP 3 complex subunit delta 1 evidence Inferred from Electronic Annotation
2262	Smp_159410.1	712.86	458.95	0.634164	10.1958	TRINITY_DN22294_c0_g1	nuclear DNA binding protein with UniProtKB:Q15ES7 evidence Non-traceable Author Statemen
2263	Smp_049380.1	36.74	23.32	0.633951	5.93216	TRINITY_DN11510_c0_g1; TRINITY_DN19821_c0_g1	chimerin rho gtpase activating protein evidence Inferred from Electronic Annotation
2264	Smp_006930.1	59.11	37.74	0.633781	6.6125	TRINITY_DN22604_c0_g1	beta 1 3 galactosyltransferase brn evidence Inferred from Electronic Annotation
2265	Smp_032250.1	30.12	19.06	0.63352	5.64904	TRINITY_DN22932_c0_g2	family S12 unassigned peptidase evidence Inferred from Electronic Annotation
2266	Smp_064870.1	32.6	20.66	0.633428	5.76182	TRINITY_DN21655_c0_g2	Dynein intermediate chain evidence Inferred from Electronic Annotation
2267	Smp_046550.1	26.96	17.03	0.632965	5.49153	TRINITY_DN21700_c0_g1; TRINITY_DN46560_c0_g1; TRINITY_DN63028_c0_g1; TRINITY_DN68212_c0_g1	Bystin evidence Inferred from Electronic Annotation
2269	Smp_156570.1	36.42	23.16	0.631189	5.92077	TRINITY_DN22132_c0_g6	WD repeat containing protein 74 evidence Inferred from Electronic Annotation
2270	Smp_102330.1	21.55	13.58	0.629137	5.17513	TRINITY_DN17861_c0_g6; TRINITY_DN42815_c0_g1	hypothetical protein evidence Inferred from Electronic Annotation
2271	Smp_245560.1	25.35	16.04	0.628878	5.40565	TRINITY_DN22452_c0_g3; TRINITY_DN23662_c0_g1	hypothetical protein evidence Inferred from Electronic Annotation
2272	Smp_027010.2	132.71	85.5	0.628335	7.77617	TRINITY_DN23067_c0_g1	AP 3 complex subunit mu 1 evidence Inferred from Electronic Annotation
2273	Smp_011710.1	33.77	21.51	0.627277	5.81455	TRINITY_DN18116_c0_g1; TRINITY_DN20169_c3_g11	hypothetical protein evidence Inferred from Electronic Annotation
2274	Smp_091790.2	42.63	27.25	0.62707	6.14731	TRINITY_DN18176_c0_g2	hypothetical protein evidence Inferred from Electronic Annotation
2275	Smp_159180.1	21.5	13.57	0.626924	5.17273	TRINITY_DN19898_c0_g1; TRINITY_DN19898_c1_g1; TRINITY_DN21909_c1_g1; TRINITY_DN21909_c1_g2; TRINITY_DN21909_c9_g5; TRINITY_DN21909_c9_g7	gamma tubulin complex component 3 evidence Inferred from Electronic Annotation
2276	Smp_075470.1	22.05	13.94	0.625587	5.20906	TRINITY_DN18713_c0_g1	cysteine desulfurase%2C mitochondrial evidence Inferred from Electronic Annotation
2278	Smp_046060.2	40.21	25.75	0.623456	6.06523	TRINITY_DN23781_c0_g2; TRINITY_DN23781_c0_g3	myosin heavy chain%2C non muscle evidence Inferred from Electronic Annotation
2279	Smp_127050.1	31.48	20.11	0.621625	5.71672	TRINITY_DN16677_c1_g2; TRINITY_DN16677_c1_g6; TRINITY_DN19855_c0_g1; TRINITY_DN21043_c0_g1	dna repair protein rad50 evidence Inferred from Electronic Annotation
2280	Smp_193410.1	15.77	9.9	0.621555	4.73715	TRINITY_DN23290_c0_g1	mitochondrial uncoupling protein evidence Inferred from Electronic Annotation
2282	Smp_053560.1	14.01	8.76	0.620971	4.57107	TRINITY_DN15132_c0_g1; TRINITY_DN5420_c0_g1	MAP kinase activated protein kinase 2 evidence Inferred from Electronic Annotation
2283	Smp_150320.1	41.41	26.58	0.620782	6.10832	TRINITY_DN23501_c0_g4; TRINITY_DN9265_c0_g1	tetratricopeptide repeat protein 14 evidence Inferred from Electronic Annotation
2284	Smp_053470.1	30.35	19.39	0.620604	5.66505	TRINITY_DN15839_c0_g1	Nucleolar protein 5A evidence Inferred from Electronic Annotation
2286	Smp_067590.2	25.97	16.57	0.618241	5.44427	TRINITY_DN21152_c0_g1; TRINITY_DN56525_c0_g1	hypothetical protein evidence Inferred from Electronic Annotation
2288	Smp_012570.1	14.38	9.03	0.616734	4.6094	TRINITY_DN22233_c0_g1	van gogh evidence Inferred from Electronic Annotation
2289	Smp_000260.1	296.61	193.1	0.616623	8.93873	TRINITY_DN22524_c0_g1	proactivator polypeptide evidence Inferred from Electronic Annotation
2292	Smp_069810.1	118.25	76.82	0.615776	7.61523	TRINITY_DN22450_c0_g2	Transmembrane protein 129 evidence Inferred from Electronic Annotation
2294	Smp_001050.1	33.1	21.26	0.615318	5.79077	TRINITY_DN23601_c1_g2; TRINITY_DN65552_c0_g1	protein C20orf152 evidence Inferred from Electronic Annotation
2296	Smp_033770.1	10.99	6.83	0.614747	4.23419	TRINITY_DN21039_c0_g1	-
2297	Smp_136490.1	25.2	16.11	0.614727	5.40293	TRINITY_DN20549_c0_g1; TRINITY_DN20549_c0_g2; TRINITY_DN20549_c0_g3	target of rapamycin complex 2 subunit MAPKAP1 evidence Inferred from Electronic Annotation
2298	Smp_072670.1	9.38	5.78	0.614449	4.01436	TRINITY_DN23602_c1_g6	hypothetical protein evidence Inferred from Electronic Annotation
2299	Smp_071470.1	24.73	15.81	0.614132	5.37643	TRINITY_DN17299_c0_g1; TRINITY_DN23765_c2_g18	interferon regulatory factor 4 db_xref PMID:17996068 evidence Traceable Author Statemen
2300	Smp_244480.1	19.93	12.68	0.613504	5.07082	TRINITY_DN729_c0_g1	putative ataxia telangiectasia mutated (atm) evidence Inferred from Electronic Annotation
2301	Smp_066760.1	121.18	78.89	0.612921	7.65155	TRINITY_DN16784_c0_g1	merlin:moesin:ezrin:radixin evidence Inferred from Electronic Annotation
2303	Smp_060900.1	49.54	32.09	0.61103	6.36859	TRINITY_DN22755_c0_g2	U4:U6 small nuclear ribonucleoprotein Prp3 evidence Inferred from Electronic Annotation
2304	Smp_090010.1	10.35	6.44	0.609318	4.15299	TRINITY_DN17276_c0_g1	molybdenum cofactor biosynthesis protein C evidence Inferred from Electronic Annotation
2305	Smp_163050.1	20.14	12.86	0.609048	5.08746	TRINITY_DN18001_c0_g1; TRINITY_DN18001_c0_g2	nadp dependent isocitrate dehydrogenase isocitrate dehydrogenase (nadp) mitochondrial evidence Inferred from Electronic Annotation
2307	Smp_245450.1	48.35	31.37	0.608393	6.33485	TRINITY_DN23774_c0_g1	coatomer protein complex subunit alpha evidence Inferred from Electronic Annotation,term coatomer subunit alpha evidence Inferred from Electronic Annotation
2308	Smp_134670.1	31.63	20.41	0.607914	5.72901	TRINITY_DN17743_c0_g1; TRINITY_DN27720_c0_g1; TRINITY_DN66235_c0_g1	ral gtpase activating evidence Inferred from Electronic Annotation
2309	Smp_062890.1	1647.01	1080.66	0.607478	11.414	TRINITY_DN20512_c0_g1	V type proton ATPase 16 kDa proteolipid evidence Inferred from Electronic Annotation
2310	Smp_073560.1	283.65	185.83	0.607463	8.87799	TRINITY_DN12057_c0_g1	target of rapamycin complex subunit lst8 evidence Inferred from Electronic Annotation
2311	Smp_056620.1	22.11	14.17	0.607296	5.22033	TRINITY_DN20575_c0_g1; TRINITY_DN23352_c0_g3	ATP dependent DNA helicase Q1 evidence Inferred from Electronic Annotation
2313	Smp_007170.1	44.89	29.15	0.606022	6.22959	TRINITY_DN22582_c0_g1	calcium binding protein 39 evidence Inferred from Electronic Annotation
2316	Smp_144160.1	21.12	13.57	0.602351	5.15745	TRINITY_DN16091_c0_g1; TRINITY_DN16091_c0_g2; TRINITY_DN3968_c1_g1; TRINITY_DN41905_c0_g1	hypothetical protein evidence Inferred from Electronic Annotation
2317	Smp_247160.1	29.48	19.09	0.601385	5.6314	TRINITY_DN20732_c0_g1; TRINITY_DN8058_c1_g1	protein sec13 evidence Inferred from Electronic Annotation
2318	Smp_194920.1	12.16	7.68	0.600393	4.38128	TRINITY_DN22781_c0_g2	T cell immunomodulatory protein evidence Inferred from Electronic Annotation
2319	Smp_144770.1	79.09	51.86	0.599446	7.04385	TRINITY_DN23392_c2_g1	hypothetical protein evidence Inferred from Electronic Annotation
2320	Smp_049010.1	37.11	24.16	0.599038	5.96047	TRINITY_DN23647_c0_g2; TRINITY_DN23647_c0_g3	RNA binding protein Nova evidence Inferred from Electronic Annotation
2322	Smp_153550.1	386.23	254.72	0.598626	9.32632	TRINITY_DN19150_c0_g1; TRINITY_DN19150_c0_g2; TRINITY_DN19150_c0_g3; TRINITY_DN19150_c0_g4	hypothetical protein evidence Inferred from Electronic Annotation
2323	Smp_158050.1	85.49	56.12	0.598537	7.15593	TRINITY_DN15981_c0_g1; TRINITY_DN18961_c0_g1; TRINITY_DN3131_c0_g1; TRINITY_DN53729_c0_g1; TRINITY_DN947_c0_g1	global transcription activator snf2l2 evidence Inferred from Electronic Annotation
2324	Smp_011860.1	19.32	12.42	0.598516	5.03298	TRINITY_DN18745_c0_g1	transcription factor LCR F1 evidence Inferred from Electronic Annotation
2325	Smp_154780.1	36.85	24	0.598365	5.9507	TRINITY_DN21420_c0_g2	trimethylguanosine synthase evidence Inferred from Electronic Annotation
2326	Smp_244970.1	28.48	18.48	0.597743	5.58376	TRINITY_DN14569_c0_g1; TRINITY_DN14569_c0_g2; TRINITY_DN19724_c7_g1; TRINITY_DN21956_c1_g7; TRINITY_DN23084_c1_g1; TRINITY_DN23084_c1_g4; TRINITY_DN23886_c0_g1; TRINITY_DN23902_c14_g12; TRINITY_DN23902_c14_g27; TRINITY_DN594_c1_g1; TRINITY_DN8698_c0_g1	coiled coil domain containing protein 81 evidence Inferred from Electronic Annotation
2327	Smp_105080.1	27.57	17.9	0.596115	5.53823	TRINITY_DN17585_c0_g1	Endonuclease G evidence Inferred from Electronic Annotation
2328	Smp_142630.1	173.65	114.57	0.5957	8.17602	TRINITY_DN20120_c0_g1; TRINITY_DN20120_c0_g2; TRINITY_DN20120_c0_g3; TRINITY_DN20120_c0_g4; TRINITY_DN20120_c0_g5; TRINITY_DN20120_c0_g6; TRINITY_DN21827_c0_g1; TRINITY_DN21827_c0_g2; TRINITY_DN35743_c0_g1; TRINITY_DN375_c0_g1; TRINITY_DN375_c0_g2; TRINITY_DN58390_c0_g1; TRINITY_DN68045_c0_g1; TRINITY_DN69929_c0_g1	talin evidence Inferred from Electronic Annotation,term talin 2 evidence Inferred from Electronic Annotation
2329	Smp_125550.1	32.94	21.46	0.595629	5.79181	TRINITY_DN19410_c0_g2; TRINITY_DN19410_c0_g4; TRINITY_DN6172_c0_g1	protein RIC1 evidence Inferred from Electronic Annotation
2330	Smp_131360.1	18.55	11.95	0.594217	4.97728	TRINITY_DN23160_c0_g2	DEAD box ATP dependent RNA helicase 13 evidence Inferred from Electronic Annotation
2331	Smp_042160.1	269.59	178.27	0.593974	8.81012	TRINITY_DN22712_c0_g1; TRINITY_DN22712_c0_g2	fructose-bisphosphate aldolase db_xref PMID:9794637 evidence Traceable Author Statemen
2332	Smp_169030.1	11.6	7.35	0.593576	4.31832	TRINITY_DN10437_c0_g1; TRINITY_DN13564_c0_g1; TRINITY_DN17719_c0_g3; TRINITY_DN66251_c0_g1	asparaginyl tRNA synthetase evidence Inferred from Electronic Annotation
2334	Smp_160850.1	28.38	18.49	0.5921	5.58105	TRINITY_DN13429_c0_g1; TRINITY_DN18287_c0_g2; TRINITY_DN21499_c0_g2; TRINITY_DN56094_c0_g1; TRINITY_DN8108_c0_g1; TRINITY_DN8108_c0_g2	nucleoprotein TPR evidence Inferred from Electronic Annotation
2335	Smp_142090.1	23.13	15.01	0.591855	5.29057	TRINITY_DN13370_c0_g1; TRINITY_DN1520_c0_g1; TRINITY_DN17377_c2_g1; TRINITY_DN20149_c0_g1; TRINITY_DN3172_c0_g1	structure specific endonuclease subunit SLX4 evidence Inferred from Electronic Annotation
2336	Smp_012450.1	53.12	34.91	0.591776	6.47622	TRINITY_DN16097_c0_g1; TRINITY_DN16097_c0_g3	tRNA threonylcarbamoyladenosine evidence Inferred from Electronic Annotation
2337	Smp_169300.1	14.13	9.04	0.591653	4.59515	TRINITY_DN19700_c0_g1	Transcription initiation factor TFIID subunit evidence Inferred from Electronic Annotation
2338	Smp_194600.1	45.38	29.78	0.59151	6.25096	TRINITY_DN21714_c1_g1; TRINITY_DN23316_c0_g1; TRINITY_DN23666_c0_g3	calcium binding mitochondrial carrier protein evidence Inferred from Electronic Annotation
2339	Smp_162000.1	22.88	14.85	0.59132	5.27538	TRINITY_DN14223_c0_g1; TRINITY_DN18187_c0_g2; TRINITY_DN259_c0_g1; TRINITY_DN26839_c0_g1; TRINITY_DN4310_c0_g1	E3 ubiquitin protein ligase UBR4 evidence Inferred from Electronic Annotation,term hypothetical protein evidence Inferred from Electronic Annotation
2341	Smp_247470.1	12.28	7.82	0.590405	4.39917	TRINITY_DN19233_c0_g2; TRINITY_DN24738_c0_g1	crossover junction endonuclease mus81 evidence Inferred from Electronic Annotation
2342	Smp_199100.1	21.6	14.01	0.590399	5.19417	TRINITY_DN15288_c1_g1; TRINITY_DN16883_c0_g1; TRINITY_DN17289_c0_g1; TRINITY_DN17289_c0_g2	TFIIH basal transcription factor complex evidence Inferred from Electronic Annotation
2344	Smp_121440.1	49.99	32.89	0.589355	6.39025	TRINITY_DN19389_c0_g1	SECIS binding protein 2 evidence Inferred from Electronic Annotation
2346	Smp_159160.1	10.46	6.62	0.588744	4.17632	TRINITY_DN14776_c0_g1; TRINITY_DN18420_c0_g1	EF hand domain containing protein 1 evidence Inferred from Electronic Annotation
2347	Smp_150440.1	54.54	35.93	0.588734	6.51523	TRINITY_DN15815_c0_g1; TRINITY_DN15815_c0_g3	tubulin specific chaperone E evidence Inferred from Electronic Annotation
2348	Smp_123950.1	18.53	11.99	0.588291	4.9782	TRINITY_DN22852_c0_g1	protein dpy 19 1 evidence Inferred from Electronic Annotation
2349	Smp_132510.1	16.16	10.43	0.586224	4.78607	TRINITY_DN17793_c0_g1; TRINITY_DN45353_c0_g1	breast cancer type 1 susceptibility protein evidence Inferred from Electronic Annotation
2350	Smp_129110.1	32.79	21.54	0.584109	5.78999	TRINITY_DN13686_c0_g1; TRINITY_DN18148_c0_g2; TRINITY_DN55439_c0_g1	fanconi associated nuclease 1 evidence Inferred from Electronic Annotation
2351	Smp_096320.1	11.77	7.52	0.583833	4.3427	TRINITY_DN22493_c0_g1; TRINITY_DN30646_c0_g1; TRINITY_DN7451_c0_g1	kelch protein 20 like evidence Inferred from Electronic Annotation
2352	Smp_126300.1	9.76	6.18	0.583622	4.08236	TRINITY_DN14541_c0_g1; TRINITY_DN1547_c0_g1; TRINITY_DN1547_c0_g2; TRINITY_DN58918_c0_g1	secretory pathway calcium atpase e secretory pathway calcium atpase c secretory pathway calcium atpase a evidence Inferred from Electronic Annotation
2353	Smp_096240.1	47.1	31.12	0.582565	6.30779	TRINITY_DN14604_c0_g1; TRINITY_DN22270_c0_g1; TRINITY_DN58279_c0_g1; TRINITY_DN71453_c0_g1	zinc finger MYND domain containing protein 11 evidence Inferred from Electronic Annotation
2355	Smp_155760.1	326.24	217.72	0.581264	9.09001	TRINITY_DN18186_c0_g1	hypothetical protein evidence Inferred from Electronic Annotation
2357	Smp_164010.1	9.91	6.3	0.579683	4.10518	TRINITY_DN23614_c0_g4; TRINITY_DN70880_c0_g1	serine:threonine protein phosphatase 6 evidence Inferred from Electronic Annotation
2359	Smp_007180.1	32.28	21.3	0.577612	5.7703	TRINITY_DN108_c0_g1; TRINITY_DN13407_c0_g1; TRINITY_DN13407_c0_g2; TRINITY_DN13801_c0_g1	hypothetical protein evidence Inferred from Electronic Annotation
2360	Smp_006760.1	17.35	11.3	0.577122	4.88996	TRINITY_DN19115_c1_g4	fasting inducible integral membrane protein evidence Inferred from Electronic Annotation
2361	Smp_126030.1	32.66	21.57	0.576629	5.78738	TRINITY_DN20856_c0_g1; TRINITY_DN68641_c0_g1	pre B cell leukemia transcription factor 1 evidence Inferred from Electronic Annotation
2362	Smp_030910.1	23.11	15.17	0.576312	5.29572	TRINITY_DN12354_c0_g1; TRINITY_DN12354_c0_g2	dynein light chain evidence Inferred from Electronic Annotation
2364	Smp_019380.1	20.41	13.36	0.576229	5.11977	TRINITY_DN19330_c0_g1	translation initiation factor eIF 2B subunit evidence Inferred from Electronic Annotation
2365	Smp_000030.2	41.73	27.66	0.576211	6.1373	TRINITY_DN21090_c0_g1	26s proteasome regulatory particle subunit evidence Inferred from Electronic Annotation
2367	Smp_079380.1	12.22	7.88	0.574091	4.39917	TRINITY_DN17540_c0_g1	serine palmitoyltransferase 2
2368	Smp_142170.1	17.86	11.67	0.573913	4.93216	TRINITY_DN12205_c0_g1; TRINITY_DN22722_c2_g2	set1:ash2 histone methyltransferase complex evidence Inferred from Electronic Annotation
2369	Smp_040970.3	74.87	50	0.573032	6.97579	TRINITY_DN23061_c0_g1	vacuolar proton atpases evidence Inferred from Electronic Annotation
2370	Smp_210500.1	95.43	63.84	0.572598	7.32436	TRINITY_DN22616_c2_g1	cathepsin L evidence Inferred from Electronic Annotation
2371	Smp_134470.1	37.45	24.86	0.572261	5.98436	TRINITY_DN21841_c1_g1; TRINITY_DN24598_c0_g1	calmodulin evidence Inferred from Electronic Annotation
2372	Smp_080850.1	15.95	10.4	0.572251	4.77347	TRINITY_DN23198_c0_g3	RNA binding protein 5 evidence Inferred from Electronic Annotation
2373	Smp_069120.1	9.94	6.36	0.571835	4.1127	TRINITY_DN12113_c0_g1; TRINITY_DN13436_c0_g1	synaptotagmin 2 evidence Inferred from Electronic Annotation
2374	Smp_159690.1	38.06	25.28	0.571727	6.00764	TRINITY_DN22022_c0_g2	nuclear pore complex protein nup85 evidence Inferred from Electronic Annotation
2375	Smp_101970.1	42.01	27.97	0.570112	6.14934	TRINITY_DN14677_c0_g1; TRINITY_DN14677_c0_g2	Placenta specificprotein 8 protein (C15 protein) evidence Inferred from Electronic Annotation
2376	Smp_094130.1	57.88	38.68	0.569366	6.60822	TRINITY_DN14643_c0_g1; TRINITY_DN21400_c0_g1; TRINITY_DN22523_c0_g1; TRINITY_DN22523_c0_g2	palmitoyltransferase zdhhc3 evidence Inferred from Electronic Annotation
2377	Smp_013460.1	145.1	97.58	0.567589	7.92884	TRINITY_DN19681_c0_g1	secretory carrier associated membrane protein evidence Inferred from Electronic Annotation
2378	Smp_244130.1	31.44	20.89	0.567502	5.73688	TRINITY_DN23680_c0_g2	translation elongation factor G evidence Inferred from Electronic Annotation
2379	Smp_166790.1	125.42	84.45	0.565072	7.72021	TRINITY_DN20684_c0_g1	zinc transporter ZIP13 evidence Inferred from Electronic Annotation
2381	Smp_148370.1	42.55	28.48	0.562936	6.17053	TRINITY_DN23086_c0_g1	thyroid receptor interacting protein 11 evidence Inferred from Electronic Annotation
2382	Smp_016840.1	19.24	12.71	0.561981	5.04221	TRINITY_DN13296_c0_g1; TRINITY_DN21111_c0_g2	exportin 4 evidence Inferred from Electronic Annotation
2384	Smp_172780.1	20.49	13.56	0.561655	5.13134	TRINITY_DN23132_c0_g2	hypothetical protein evidence Inferred from Electronic Annotation
2385	Smp_161960.1	70.22	47.26	0.561455	6.8885	TRINITY_DN23354_c0_g1	hypothetical protein evidence Inferred from Electronic Annotation
2386	Smp_24580.1	12.25	7.98	0.561205	4.40803	TRINITY_DN12152_c0_g1; TRINITY_DN67219_c0_g1; TRINITY_DN69502_c0_g1	-
2387	Smp_143490.1	14.86	9.75	0.561056	4.67864	TRINITY_DN18976_c0_g1	DNA replication licensing factor MCM5 evidence Inferred from Electronic Annotation
2388	Smp_143140.1	906.59	614.83	0.559509	10.5722	TRINITY_DN19253_c0_g1	elongation factor 2 evidence Inferred from Electronic Annotation
2389	Smp_020070.1	13.25	8.67	0.559374	4.51854	TRINITY_DN23740_c1_g1	hypothetical protein evidence Inferred from Electronic Annotation
2390	Smp_133330.1	18.11	11.97	0.559149	4.95791	TRINITY_DN16626_c0_g1; TRINITY_DN21055_c0_g1	acid sphingomyelinase phosphodiesterase 3b evidence Inferred from Electronic Annotation
2392	Smp_009150.1	36.05	24.15	0.558915	5.93546	TRINITY_DN20991_c0_g1	3 oxoacyl (acyl carrier protein) synthase evidence Inferred from Electronic Annotation
2393	Smp_247220.1	76.09	51.37	0.557803	7.00518	TRINITY_DN19285_c1_g1; TRINITY_DN19285_c1_g2; TRINITY_DN19560_c1_g1; TRINITY_DN5903_c0_g1; TRINITY_DN65772_c0_g1; TRINITY_DN8429_c0_g1	DC STAMP domain containing protein 2 evidence Inferred from Electronic Annotation
2394	Smp_156390.1	20.07	13.32	0.557159	5.10392	TRINITY_DN12266_c0_g1; TRINITY_DN16499_c0_g2; TRINITY_DN28430_c0_g1	growth factor receptor bound protein evidence Inferred from Electronic Annotation
2395	Smp_029750.1	610.29	414.62	0.556592	10.0027	TRINITY_DN17601_c0_g1	hypothetical protein evidence Inferred from Electronic Annotation
2396	Smp_093740.3	75.41	50.96	0.55636	6.99288	TRINITY_DN17052_c0_g1; TRINITY_DN20791_c0_g1	hepatocyte growth factor regulated tyrosine evidence Inferred from Electronic Annotation
2397	Smp_213260.1	13.55	8.9	0.555519	4.55152	TRINITY_DN22864_c0_g1	hypothetical protein evidence Inferred from Electronic Annotation
2398	Smp_045040.1	57.65	38.92	0.555019	6.60837	TRINITY_DN21338_c0_g1; TRINITY_DN21338_c0_g2	rrna methyltransferase 3 evidence Inferred from Electronic Annotation
2401	Smp_213220.1	101.59	68.88	0.553939	7.42181	TRINITY_DN19588_c0_g1; TRINITY_DN19588_c0_g2	hypothetical protein evidence Inferred from Electronic Annotation
2403	Smp_035010.1	80.47	54.52	0.553261	7.08736	TRINITY_DN17744_c0_g1	chibby 1 evidence Inferred from Electronic Annotation
2405	Smp_093820.1	114.63	77.89	0.551601	7.59634	TRINITY_DN17491_c0_g1; TRINITY_DN23610_c2_g8; TRINITY_DN23610_c2_g9; TRINITY_DN40108_c0_g1	glutamate dehydrogenase evidence Inferred from Electronic Annotation
2406	Smp_050920.1	52.47	35.49	0.551229	6.47508	TRINITY_DN21213_c6_g17; TRINITY_DN22255_c1_g2	transformer 2 protein evidence Inferred from Electronic Annotation
2407	Smp_110050.1	49.65	33.57	0.551042	6.39609	TRINITY_DN22395_c0_g1	tyrosine protein kinase transforming protein Fps evidence Inferred from Electronic Annotation
2408	Smp_013070.1	37.67	25.42	0.549584	6.00203	TRINITY_DN21154_c0_g1; TRINITY_DN68876_c0_g1	one cut domain family member evidence Inferred from Electronic Annotation
2409	Smp_096360.1	27.89	18.74	0.549448	5.5738	TRINITY_DN21126_c5_g1	replication factor C subunit 4 evidence Inferred from Electronic Annotation
2410	Smp_171150.1	62.13	42.19	0.547628	6.71864	TRINITY_DN21910_c0_g2	protein arginine N methyltransferase 5 evidence Inferred from Electronic Annotation
2411	Smp_050390.1	281.29	192.19	0.547158	8.8902	TRINITY_DN14478_c0_g1; TRINITY_DN19804_c0_g1; TRINITY_DN20392_c0_g1; TRINITY_DN21143_c0_g2; TRINITY_DN21326_c1_g1; TRINITY_DN23021_c1_g1; TRINITY_DN23084_c1_g16; TRINITY_DN67477_c0_g1	aldehyde dehydrogenase with UniProtKB:Q94746 evidence Non-traceable Author Statemen
2412	Smp_148480.1	37.63	25.44	0.547	6.00158	TRINITY_DN11162_c0_g1; TRINITY_DN11713_c0_g1; TRINITY_DN16844_c0_g1	Cleavage and polyadenylation specificity factor evidence Inferred from Electronic Annotation
2413	Smp_151730.1	18.96	12.67	0.546098	5.02813	TRINITY_DN20192_c0_g1	Rhabdoid tumor deletion region protein 1 evidence Inferred from Electronic Annotation
2414	Smp_010690.1	10.86	7.13	0.544777	4.24717	TRINITY_DN23762_c0_g5	actin related protein 2:3 complex%2C subunit 2 evidence Inferred from Electronic Annotation
2415	Smp_054790.2	12.18	8.04	0.543956	4.40735	TRINITY_DN1163_c0_g1; TRINITY_DN15880_c0_g1; TRINITY_DN18435_c0_g1; TRINITY_DN59757_c0_g1	cytoskeleton associated protein 5 evidence Inferred from Electronic Annotation
2416	Smp_161460.1	70.67	48.2	0.542711	6.90533	TRINITY_DN22886_c0_g1	U4:U6 small nuclear ribonucleoprotein Prp31 evidence Inferred from Electronic Annotation
2417	Smp_061250.1	30.22	20.45	0.541493	5.69125	TRINITY_DN23495_c0_g1	solute carrier family 25 6 evidence Inferred from Electronic Annotation
2418	Smp_094340.1	91.3	62.44	0.540938	7.2737	TRINITY_DN16305_c0_g1; TRINITY_DN20469_c0_g2	hypothetical protein evidence Inferred from Electronic Annotation
2419	Smp_140020.1	9.75	6.39	0.54069	4.0993	TRINITY_DN12253_c0_g1; TRINITY_DN12253_c0_g2; TRINITY_DN15387_c0_g1; TRINITY_DN15387_c0_g2; TRINITY_DN16224_c0_g1	hypothetical protein evidence Inferred from Electronic Annotation
2420	Smp_175430.1	84.41	57.72	0.540553	7.16118	TRINITY_DN20312_c0_g1; TRINITY_DN22470_c1_g2; TRINITY_DN50589_c0_g1	DNA damage binding protein 1 evidence Inferred from Electronic Annotation
2422	Smp_026320.1	14.32	9.54	0.539541	4.63575	TRINITY_DN11245_c0_g1; TRINITY_DN30121_c0_g1; TRINITY_DN3432_c0_g1; TRINITY_DN45524_c0_g1	hypothetical protein evidence Inferred from Electronic Annotation
2423	Smp_021600.1	12.5	8.29	0.539209	4.44559	TRINITY_DN21979_c0_g1	Trimeric intracellular cation channel type B evidence Inferred from Electronic Annotation
2424	Smp_175660.1	125.2	85.89	0.53845	7.72853	TRINITY_DN19962_c0_g1	B cell receptor associated protein with UniProtKB:Q15ET3 evidence Non-traceable Author Statemen
2425	Smp_027550.2	18.04	12.11	0.538366	4.96116	TRINITY_DN23039_c0_g5	RNA binding protein 15B evidence Inferred from Electronic Annotation
2426	Smp_078700.1	12.62	8.38	0.538067	4.45943	TRINITY_DN23487_c0_g1; TRINITY_DN23487_c0_g3	hypothetical protein evidence Inferred from Electronic Annotation
2427	Smp_173390.1	60.66	41.5	0.536872	6.68874	TRINITY_DN19333_c0_g1; TRINITY_DN19333_c0_g2	DnaJ protein subfamily C evidence Inferred from Electronic Annotation
2428	Smp_040570.1	342.54	235.84	0.536565	9.17837	TRINITY_DN17780_c0_g1; TRINITY_DN19672_c0_g1	ras protein Rab 5A evidence Inferred from Electronic Annotation
2429	Smp_176600.1	339.4	233.74	0.536167	9.16526	TRINITY_DN11782_c0_g1; TRINITY_DN11782_c0_g2; TRINITY_DN11782_c0_g3; TRINITY_DN13895_c0_g1; TRINITY_DN13895_c0_g2; TRINITY_DN13895_c0_g3; TRINITY_DN17994_c0_g1	serine:threonine protein phosphatase 2A 56 kDa evidence Inferred from Electronic Annotation
2430	Smp_134560.1	27.11	18.41	0.534283	5.53978	TRINITY_DN20518_c0_g1; TRINITY_DN21448_c0_g1; TRINITY_DN23112_c0_g2; TRINITY_DN64080_c0_g1; TRINITY_DN9794_c0_g1; TRINITY_DN9794_c0_g2	serine:threonine protein kinase doa evidence Inferred from Electronic Annotation
2431	Smp_032420.1	45.88	31.4	0.532979	6.29057	TRINITY_DN20338_c0_g1	presenilins associated rhomboid protein evidence Inferred from Electronic Annotation
2432	Smp_104980.1	84.83	58.35	0.532234	7.17173	TRINITY_DN18174_c0_g3; TRINITY_DN19603_c0_g2	G2:M phase specific E3 ubiquitin protein ligase evidence Inferred from Electronic Annotation
2433	Smp_241920.1	9.58	6.32	0.531424	4.07895	TRINITY_DN12045_c0_g1; TRINITY_DN12112_c0_g1; TRINITY_DN17600_c0_g1	nucleolar protein c7b evidence Inferred from Electronic Annotation
2434	Smp_173330.1	15.63	10.51	0.5309	4.76235	TRINITY_DN12842_c0_g1; TRINITY_DN16262_c0_g1	Vacuolar protein sorting associated protein evidence Inferred from Electronic Annotation
2435	Smp_009650.2	125.58	86.61	0.530882	7.736	TRINITY_DN19711_c0_g1	mitochondrial processing peptidase beta subunit evidence Inferred from Electronic Annotation
2436	Smp_155360.1	20.02	13.55	0.530744	5.11145	TRINITY_DN15495_c0_g1	DNA binding protein inhibitor ID 1 evidence Inferred from Electronic Annotation
2438	Smp_141080.1	44.12	30.25	0.529911	6.23592	TRINITY_DN14870_c0_g1	DnaJ subfamily B 1 evidence Inferred from Electronic Annotation
2439	Smp_072350.1	60.49	41.59	0.529837	6.68762	TRINITY_DN13642_c0_g1; TRINITY_DN20618_c0_g1; TRINITY_DN32995_c0_g1; TRINITY_DN36774_c0_g1; TRINITY_DN6322_c0_g1; TRINITY_DN6322_c0_g2	serine:threonine protein phosphatase 4 evidence Inferred from Electronic Annotation
2440	Smp_157220.1	19.19	12.99	0.529245	5.05224	TRINITY_DN20426_c0_g1; TRINITY_DN59948_c0_g1	nuclear pore complex protein Nup188 evidence Inferred from Electronic Annotation
2441	Smp_191870.1	43.79	30.05	0.528583	6.22574	TRINITY_DN21356_c0_g1	serine:threonine protein kinase haspin db_xref PMID:16051070 evidence Traceable Author Statemen
2442	Smp_076650.2	52.08	35.8	0.528463	6.47379	TRINITY_DN23288_c2_g1	ORAI calcium release activated calcium modulator evidence Inferred from Electronic Annotation
2443	Smp_148560.1	24.54	16.73	0.526566	5.40156	TRINITY_DN18315_c0_g1	MMP37 protein%2C mitochondrial like evidence Inferred from Electronic Annotation
2444	Smp_022630.1	21.35	14.52	0.526146	5.20438	TRINITY_DN13119_c0_g2; TRINITY_DN17740_c1_g2; TRINITY_DN17740_c1_g3; TRINITY_DN20947_c0_g1; TRINITY_DN35361_c0_g1; TRINITY_DN9865_c0_g1	testis expressed sequence 2 protein evidence Inferred from Electronic Annotation
2445	Smp_245600.1	28.88	19.76	0.525374	5.63343	TRINITY_DN2102_c0_g1; TRINITY_DN21943_c0_g1; TRINITY_DN22430_c1_g1	anion exchange protein 3 evidence Inferred from Electronic Annotation,term anion exchange protein 2 evidence Inferred from Electronic Annotation
2446	Smp_242970.1	72537	50400.2	0.525277	16.9076	TRINITY_DN11545_c0_g1; TRINITY_DN16406_c0_g1; TRINITY_DN17297_c0_g1; TRINITY_DN1786_c0_g1; TRINITY_DN20369_c0_g1; TRINITY_DN4135_c0_g1; TRINITY_DN63669_c0_g1; TRINITY_DN65728_c0_g1	fras1 related extracellular matrix protein evidence Inferred from Electronic Annotation
2447	Smp_034980.3	54.13	37.31	0.525117	6.53045	TRINITY_DN18576_c1_g2	protein phosphatase evidence Inferred from Electronic Annotation
2448	Smp_134580.1	15.85	10.71	0.525008	4.7845	TRINITY_DN17977_c0_g1; TRINITY_DN17977_c0_g10; TRINITY_DN17977_c0_g2; TRINITY_DN17977_c0_g3; TRINITY_DN17977_c0_g4; TRINITY_DN17977_c0_g5; TRINITY_DN17977_c0_g6; TRINITY_DN17977_c0_g7; TRINITY_DN17977_c0_g8; TRINITY_DN17977_c0_g9	hypothetical protein evidence Inferred from Electronic Annotation
2449	Smp_095810.1	63.39	43.75	0.524949	6.75676	TRINITY_DN11309_c0_g2; TRINITY_DN18543_c1_g1; TRINITY_DN18587_c4_g5; TRINITY_DN19518_c0_g1; TRINITY_DN19518_c0_g2; TRINITY_DN23326_c0_g1; TRINITY_DN23599_c4_g28; TRINITY_DN23599_c4_g5; TRINITY_DN39491_c0_g1; TRINITY_DN54487_c0_g1; TRINITY_DN7798_c0_g1	uracil phosphoribosyltransferase evidence Inferred from Electronic Annotation
2450	Smp_031000.1	74.91	51.8	0.523752	6.99673	TRINITY_DN22535_c0_g1	cullin 3 evidence Inferred from Electronic Annotation
2451	Smp_162660.1	16.61	11.25	0.523613	4.851	TRINITY_DN19388_c0_g1; TRINITY_DN19388_c0_g2	glutamine dependent NAD(+) synthetase evidence Inferred from Electronic Annotation
2452	Smp_125660.1	13	8.74	0.523433	4.50716	TRINITY_DN22016_c1_g5; TRINITY_DN22016_c1_g9	epithelial splicing regulatory protein 1 evidence Inferred from Electronic Annotation
2453	Smp_154420.2	59.71	41.24	0.523324	6.67172	TRINITY_DN22288_c0_g1; TRINITY_DN36456_c0_g1	clathrin heavy chain evidence Inferred from Electronic Annotation
2454	Smp_242530.1	169.18	117.45	0.522783	8.16807	TRINITY_DN21491_c0_g1; TRINITY_DN21491_c0_g4; TRINITY_DN21491_c0_g7; TRINITY_DN23529_c0_g1	subfamily M23B non peptidase ue evidence Inferred from Electronic Annotation
2455	Smp_165080.1	10.1	6.73	0.522019	4.15623	TRINITY_DN15915_c0_g1; TRINITY_DN21909_c4_g1; TRINITY_DN21909_c4_g3	hypothetical protein evidence Inferred from Electronic Annotation
2456	Smp_061840.1	18.73	12.74	0.522009	5.02104	TRINITY_DN13287_c0_g1; TRINITY_DN13287_c0_g2; TRINITY_DN13287_c0_g3; TRINITY_DN13287_c0_g4; TRINITY_DN17568_c0_g1	RAD50 interacting protein 1 evidence Inferred from Electronic Annotation
2457	Smp_247400.1	18.42	12.54	0.520315	4.9982	TRINITY_DN18617_c0_g1; TRINITY_DN46502_c0_g1; TRINITY_DN63091_c0_g1	Fanconi anemia group I protein evidence Inferred from Electronic Annotation
2459	Smp_024140.1	648.21	451.89	0.519525	10.1047	TRINITY_DN21556_c0_g1	polyadenylate binding protein evidence Inferred from Electronic Annotation
2460	Smp_166030.1	147.57	102.66	0.519284	7.97286	TRINITY_DN22814_c0_g1; TRINITY_DN22814_c0_g10; TRINITY_DN22814_c0_g11; TRINITY_DN22814_c0_g12; TRINITY_DN22814_c0_g14; TRINITY_DN22814_c0_g16; TRINITY_DN22814_c0_g17; TRINITY_DN22814_c0_g2; TRINITY_DN22814_c0_g23; TRINITY_DN22814_c0_g24; TRINITY_DN22814_c0_g6; TRINITY_DN22814_c0_g8; TRINITY_DN66388_c0_g1	erythrocyte membrane protein evidence Inferred from Electronic Annotation
2461	Smp_039640.2	36.32	25.06	0.518112	5.96301	TRINITY_DN22048_c0_g1; TRINITY_DN61028_c0_g1	Retinoblastoma binding protein 6 evidence Inferred from Electronic Annotation
2462	Smp_085110.1	68.75	47.73	0.517383	6.87627	TRINITY_DN17119_c0_g1	dihydropyrimidinase (M38 family) evidence Inferred from Electronic Annotation
2463	Smp_124760.1	14.14	9.58	0.517026	4.62761	TRINITY_DN10616_c0_g1; TRINITY_DN16570_c0_g1; TRINITY_DN19142_c0_g1	hypothetical protein evidence Inferred from Electronic Annotation
2464	Smp_245890.1	24.3	16.68	0.517019	5.39163	TRINITY_DN16227_c0_g1; TRINITY_DN16227_c0_g2; TRINITY_DN23594_c0_g1	cation transporting atpase worm evidence Inferred from Electronic Annotation
2466	Smp_210170.1	50.9	35.29	0.516162	6.44609	TRINITY_DN23795_c0_g5	RNA polymerase II associated protein 2 evidence Inferred from Electronic Annotation
2467	Smp_148790.1	26.84	18.47	0.515906	5.53325	TRINITY_DN13758_c0_g1; TRINITY_DN20781_c0_g1; TRINITY_DN20781_c0_g2; TRINITY_DN56708_c0_g1	laminin subunit beta 1 evidence Inferred from Electronic Annotation
2468	Smp_147150.1	10.05	6.73	0.515506	4.15218	TRINITY_DN23043_c0_g1; TRINITY_DN67512_c0_g1	heterogeneous nuclear ribonucleoprotein C evidence Inferred from Electronic Annotation
2471	Smp_000310.1	106.12	73.97	0.514843	7.50056	TRINITY_DN18061_c0_g2	transmembrane protein 41B evidence Inferred from Electronic Annotation
2473	Smp_124700.1	22.27	15.29	0.514485	5.26903	TRINITY_DN22365_c0_g1; TRINITY_DN436_c0_g1	integrator complex subunit 7 evidence Inferred from Electronic Annotation
2474	Smp_063830.1	265.26	185.57	0.513119	8.81964	TRINITY_DN23350_c0_g1; TRINITY_DN23350_c0_g2; TRINITY_DN23350_c0_g4; TRINITY_DN23350_c0_g5; TRINITY_DN23350_c0_g6; TRINITY_DN23350_c0_g7	GMP synthase (glutamine hydrolyzing) evidence Inferred from Electronic Annotation
2475	Smp_077720.1	42.18	29.27	0.512475	6.17891	TRINITY_DN23480_c0_g1; TRINITY_DN8750_c0_g1	annexin B2 db_xref PMID:20417203 evidence Traceable Author Statemen
2478	Smp_181050.1	33.3	23.11	0.508577	5.84323	TRINITY_DN23443_c3_g16; TRINITY_DN23743_c0_g3; TRINITY_DN23743_c0_g4	hypothetical protein evidence Inferred from Electronic Annotation
2481	Smp_030730.1	2157.89	1517.23	0.507899	11.844	TRINITY_DN23138_c0_g3	tubulin beta 2B chain evidence Inferred from Electronic Annotation
2482	Smp_153960.1	26.47	18.32	0.507762	5.51696	TRINITY_DN23170_c0_g1	presenilin with UniProtKB:C0SKM6 evidence Non-traceable Author Statemen
2483	Smp_125120.1	23.91	16.52	0.507722	5.3726	TRINITY_DN19679_c0_g1	hypothetical protein evidence Inferred from Electronic Annotation
2484	Smp_166370.1	32.88	22.83	0.507655	5.82553	TRINITY_DN22934_c0_g1; TRINITY_DN22934_c0_g4	hypothetical protein evidence Inferred from Electronic Annotation
2485	Smp_064400.1	17.64	12.12	0.506634	4.94298	TRINITY_DN22148_c0_g1	hypothetical protein evidence Inferred from Electronic Annotation
2486	Smp_010280.1	23.93	16.56	0.50559	5.37469	TRINITY_DN12522_c0_g2; TRINITY_DN19582_c1_g1; TRINITY_DN19582_c1_g3; TRINITY_DN38755_c0_g1	monoacylglycerol lipase abhd12 evidence Inferred from Electronic Annotation
2490	Smp_147940.2	80.39	56.38	0.504304	7.10612	TRINITY_DN23526_c1_g6	phosphatidate phosphatase lpin3 evidence Inferred from Electronic Annotation
2491	Smp_147520.1	113.85	79.97	0.504291	7.606	TRINITY_DN11950_c3_g1; TRINITY_DN21332_c1_g1; TRINITY_DN21714_c0_g1; TRINITY_DN23441_c0_g4; TRINITY_DN3761_c4_g1; TRINITY_DN42191_c0_g1; TRINITY_DN50532_c0_g1; TRINITY_DN57794_c0_g1; TRINITY_DN59862_c0_g1	Tripartite motif containing protein 37 evidence Inferred from Electronic Annotation
2492	Smp_158040.1	81.94	57.59	0.501414	7.13473	TRINITY_DN17355_c0_g4	hypothetical protein evidence Inferred from Electronic Annotation
2495	Smp_035180.1	18.81	13	0.500802	5.03606	TRINITY_DN12341_c0_g1; TRINITY_DN19272_c0_g3	potassium voltage gated channel subfamily D evidence Inferred from Electronic Annotation
2496	Smp_140490.1	154.06	108.65	0.499921	8.04281	TRINITY_DN20261_c0_g1	protein kinase C and casein kinase substrate evidence Inferred from Electronic Annotation
2497	Smp_212260.1	87.84	61.85	0.499297	7.23544	TRINITY_DN23400_c0_g1; TRINITY_DN23400_c0_g3; TRINITY_DN23400_c0_g4; TRINITY_DN23400_c0_g5	histone binding protein Caf1 evidence Inferred from Electronic Annotation
2499	Smp_126020.1	55.36	38.91	0.497921	6.57395	TRINITY_DN19504_c0_g1; TRINITY_DN5907_c0_g1	fumarate hydratase class I evidence Inferred from Electronic Annotation
2500	Smp_028360.1	16.08	11.1	0.497301	4.8166	TRINITY_DN18660_c0_g2	tubulin epsilon chain evidence Inferred from Electronic Annotation
2501	Smp_058130.2	89.09	62.87	0.496229	7.25701	TRINITY_DN23699_c0_g1; TRINITY_DN23699_c0_g2; TRINITY_DN23699_c0_g4; TRINITY_DN23699_c0_g6; TRINITY_DN23699_c0_g7	mitochondrial carrier protein evidence Inferred from Electronic Annotation
2502	Smp_147850.1	40.35	28.33	0.49551	6.12267	TRINITY_DN21106_c0_g1	large subunit gtpase 1 evidence Inferred from Electronic Annotation
2503	Smp_148050.1	280.9	198.96	0.495472	8.90947	TRINITY_DN19300_c0_g2; TRINITY_DN5805_c0_g1	glutaminyl tRNA synthetase db_xref PMID:12489010 evidence Traceable Author Statemen
2504	Smp_146800.1	35.37	24.81	0.494819	5.93499	TRINITY_DN19119_c0_g1; TRINITY_DN20882_c5_g1	atlastin 2 evidence Inferred from Electronic Annotation
2505	Smp_212940.1	30.94	21.67	0.49458	5.74443	TRINITY_DN22654_c0_g1	sideroflexin 1 evidence Inferred from Electronic Annotation
2507	Smp_070070.2	20.72	14.42	0.494221	5.17552	TRINITY_DN21371_c0_g1; TRINITY_DN23895_c7_g31	pre mrna 3' end processing factor fip1 evidence Inferred from Electronic Annotation
2508	Smp_132940.1	45.68	32.15	0.493796	6.30067	TRINITY_DN18952_c0_g1	PRKCA binding protein evidence Inferred from Electronic Annotation
2509	Smp_175920.1	16.01	11.08	0.493763	4.81198	TRINITY_DN19485_c0_g1	hypothetical protein evidence Inferred from Electronic Annotation
2510	Smp_128860.1	9.94	6.77	0.493626	4.14649	TRINITY_DN18753_c0_g2	lysyl oxidase 2 evidence Inferred from Electronic Annotation
2511	Smp_162630.1	40.15	28.23	0.493443	6.11645	TRINITY_DN23470_c0_g1	ubiquitin activating enzyme E1 evidence Inferred from Electronic Annotation
2512	Smp_175280.1	13.34	9.19	0.492891	4.55643	TRINITY_DN18560_c0_g1	hypothetical protein evidence Inferred from Electronic Annotation
2514	Smp_204770.1	151.32	107.29	0.492205	8.0202	TRINITY_DN17011_c0_g1	citrate synthase evidence Inferred from Electronic Annotation
2515	Smp_056780.1	601.57	427.52	0.491766	10.0086	TRINITY_DN18267_c0_g1	dynein light chain evidence Inferred from Electronic Annotation
2516	Smp_035150.1	178.76	126.9	0.491056	8.2605	TRINITY_DN15868_c0_g1	hypothetical protein evidence Inferred from Electronic Annotation
2517	Smp_072790.2	88.06	62.38	0.49075	7.2426	TRINITY_DN17448_c0_g1	xpa binding protein 1 (mbdin) evidence Inferred from Electronic Annotation
2518	Smp_006740.1	121.07	85.88	0.490613	7.70009	TRINITY_DN15881_c0_g1	major vault protein evidence Inferred from Electronic Annotation
2520	Smp_127580.1	37.08	26.11	0.490208	6.00428	TRINITY_DN16974_c0_g1; TRINITY_DN18716_c0_g2	dis3 exonuclease 2 evidence Inferred from Electronic Annotation
2521	Smp_064040.2	10.47	7.17	0.489457	4.22033	TRINITY_DN15012_c0_g1; TRINITY_DN20882_c1_g1	serine:threonine protein kinase PAK 1 evidence Inferred from Electronic Annotation
2522	Smp_171670.1	29.78	20.94	0.48843	5.69265	TRINITY_DN21805_c1_g1; TRINITY_DN21805_c1_g2; TRINITY_DN4978_c0_g1; TRINITY_DN4978_c0_g2	DDB1 and CUL4 associated factor 11 evidence Inferred from Electronic Annotation
2523	Smp_094050.1	117.18	83.26	0.488066	7.65421	TRINITY_DN23195_c0_g1; TRINITY_DN23195_c0_g11; TRINITY_DN23195_c0_g12; TRINITY_DN23195_c0_g2; TRINITY_DN23195_c0_g4; TRINITY_DN23195_c0_g6; TRINITY_DN23195_c0_g9	mitochondrial processing peptidase evidence Inferred from Electronic Annotation
2524	Smp_172240.1	31.51	22.19	0.487381	5.77347	TRINITY_DN17153_c0_g2; TRINITY_DN36702_c0_g1	stress activated protein kinase JNK evidence Inferred from Electronic Annotation
2525	Smp_199730.1	97.28	69.12	0.487072	7.38716	TRINITY_DN16081_c0_g2; TRINITY_DN4803_c0_g1	cytochrome c oxidase subunit XV assembly evidence Inferred from Electronic Annotation
2526	Smp_155320.1	25.02	17.57	0.486647	5.44593	TRINITY_DN21587_c0_g1; TRINITY_DN57445_c0_g1	hypothetical protein with UniProtKB:G4LUN4 evidence Inferred from Electronic Annotation
2528	Smp_123500.1	52.9	37.49	0.485802	6.51396	TRINITY_DN11871_c0_g1; TRINITY_DN13840_c0_g1; TRINITY_DN21966_c0_g1	ATP dependent RNA helicase DHX37 evidence Inferred from Electronic Annotation
2529	Smp_176490.1	43.66	30.9	0.485427	6.23955	TRINITY_DN23410_c0_g1	hypothetical protein evidence Inferred from Electronic Annotation
2530	Smp_032770.1	19.74	13.82	0.48487	5.11103	TRINITY_DN19537_c0_g1	cassette chromosome recombinase b evidence Inferred from Electronic Annotation
2531	Smp_000240.2	187.3	133.58	0.484569	8.33038	TRINITY_DN19466_c0_g1	RNA binding protein EWS evidence Inferred from Electronic Annotation
2532	Smp_159730.1	9.94	6.82	0.484372	4.15056	TRINITY_DN22804_c0_g2	protein kinase evidence Inferred from Electronic Annotation
2533	Smp_030280.1	94.71	67.44	0.48383	7.35006	TRINITY_DN18800_c0_g2	OTU domain containing protein 6B evidence Inferred from Electronic Annotation
2534	Smp_170950.1	22.07	15.5	0.483552	5.26941	TRINITY_DN22942_c0_g1	hypothetical protein evidence Inferred from Electronic Annotation
2535	Smp_248100.1	23.45	16.49	0.483304	5.35544	TRINITY_DN21997_c1_g1; TRINITY_DN21997_c1_g2; TRINITY_DN21997_c1_g3; TRINITY_DN21997_c1_g4; TRINITY_DN21997_c1_g5	nuclear hormone receptor evidence Inferred from Electronic Annotation
2536	Smp_245070.1	179.5	128.12	0.483286	8.26969	TRINITY_DN1222_c0_g1; TRINITY_DN1222_c0_g2; TRINITY_DN1519_c0_g1; TRINITY_DN1519_c0_g2; TRINITY_DN17043_c0_g1; TRINITY_DN17043_c0_g2; TRINITY_DN17068_c1_g3; TRINITY_DN17068_c1_g4; TRINITY_DN18543_c1_g2; TRINITY_DN18543_c1_g3; TRINITY_DN19283_c0_g1; TRINITY_DN19283_c0_g2; TRINITY_DN19283_c0_g3; TRINITY_DN21421_c0_g1; TRINITY_DN22212_c4_g1; TRINITY_DN22730_c0_g1; TRINITY_DN27562_c0_g1; TRINITY_DN28…	hypothetical protein evidence Inferred from Electronic Annotation
2537	Smp_031990.1	16.74	11.71	0.481042	4.8802	TRINITY_DN18838_c0_g1	glutamyl tRNA(Gln) amidotransferase subunit A evidence Inferred from Electronic Annotation
2539	Smp_011990.1	36.56	25.92	0.480519	5.98823	TRINITY_DN15825_c0_g3	beta galactosidase evidence Inferred from Electronic Annotation
2540	Smp_088240.1	52.34	37.26	0.479381	6.50144	TRINITY_DN21274_c0_g1	hypothetical protein evidence Inferred from Electronic Annotation
2541	Smp_127110.1	42.19	29.98	0.47936	6.19318	TRINITY_DN21984_c0_g4	arginyl tRNA protein transferase 1 evidence Inferred from Electronic Annotation
2543	Smp_031710.1	66.47	47.41	0.478941	6.84398	TRINITY_DN1722_c0_g1; TRINITY_DN1722_c0_g2; TRINITY_DN20037_c1_g1	NADH dehydrogenase (ubiquinone) 1 alpha evidence Inferred from Electronic Annotation
2544	Smp_210520.1	39.68	28.19	0.478845	6.1058	TRINITY_DN21353_c0_g2; TRINITY_DN23014_c0_g1; TRINITY_DN23014_c0_g2	transcription factor Dp 1 evidence Inferred from Electronic Annotation
2545	Smp_096310.1	18.37	12.9	0.478739	5.01212	TRINITY_DN18022_c0_g1; TRINITY_DN21839_c0_g1; TRINITY_DN9739_c0_g1; TRINITY_DN9739_c0_g2	atypical protein kinase C evidence Inferred from Electronic Annotation
2546	Smp_122370.2	20.18	14.2	0.478631	5.14486	TRINITY_DN18614_c0_g1; TRINITY_DN19590_c0_g1; TRINITY_DN63202_c0_g1	zinc finger protein evidence Inferred from Electronic Annotation
2547	Smp_127440.1	97.16	69.47	0.478126	7.38914	TRINITY_DN13993_c0_g4; TRINITY_DN14932_c0_g1; TRINITY_DN23292_c2_g1; TRINITY_DN23292_c2_g5; TRINITY_DN3363_c0_g1; TRINITY_DN49859_c0_g1; TRINITY_DN53444_c0_g1	Serine rich adhesin for platelets evidence Inferred from Electronic Annotation
2548	Smp_181120.1	60.37	43.06	0.478064	6.70639	TRINITY_DN19176_c0_g1; TRINITY_DN19176_c0_g2; TRINITY_DN5648_c0_g1; TRINITY_DN5648_c0_g2	amyloid protein binding protein 2 evidence Inferred from Electronic Annotation
2550	Smp_043130.1	55.73	39.81	0.475189	6.59305	TRINITY_DN19599_c0_g2	survival of motor neuron protein interacting evidence Inferred from Electronic Annotation
2551	Smp_071380.2	13.8	9.65	0.474744	4.61176	TRINITY_DN21362_c0_g1	zinc finger protein evidence Inferred from Electronic Annotation
2552	Smp_082850.2	70.82	50.69	0.4745	6.93676	TRINITY_DN21436_c0_g1	cullin evidence Inferred from Electronic Annotation
2553	Smp_045260.1	10.42	7.22	0.474352	4.22033	TRINITY_DN22842_c0_g1	5 aminolevulinate synthase%2C nonspecific evidence Inferred from Electronic Annotation
2554	Smp_026250.3	30.91	21.97	0.474258	5.75168	TRINITY_DN18649_c0_g1; TRINITY_DN21705_c0_g1	peptide alpha N acetyltransferase evidence Inferred from Electronic Annotation
2555	Smp_146060.1	16.59	11.67	0.473339	4.87086	TRINITY_DN19595_c0_g1; TRINITY_DN60365_c0_g1	Ral GTPase activating protein subunit alpha 1 evidence Inferred from Electronic Annotation
2556	Smp_210460.1	184.98	133.02	0.472699	8.31741	TRINITY_DN23200_c0_g1	anaphase promoting complex subunit 10 evidence Inferred from Electronic Annotation
2558	Smp_179610.1	50.76	36.33	0.471502	6.46091	TRINITY_DN16777_c0_g1; TRINITY_DN8972_c0_g1	GTPase activating protein ZNF289 evidence Inferred from Electronic Annotation
2559	Smp_143430.1	61.39	44.01	0.471069	6.73335	TRINITY_DN19043_c0_g1; TRINITY_DN23890_c0_g12; TRINITY_DN23890_c0_g4; TRINITY_DN23890_c0_g6; TRINITY_DN25036_c0_g1	alpha mannosidase 2x evidence Inferred from Electronic Annotation
2561	Smp_170150.1	9.62	6.67	0.469485	4.11187	TRINITY_DN17982_c0_g4; TRINITY_DN22851_c0_g4; TRINITY_DN4055_c0_g1; TRINITY_DN4055_c0_g2; TRINITY_DN7593_c0_g1	hypothetical protein evidence Inferred from Electronic Annotation
2562	Smp_174210.1	43.5	31.15	0.468987	6.24127	TRINITY_DN19221_c0_g1; TRINITY_DN20073_c0_g2; TRINITY_DN20073_c0_g4	ATP dependent RNA helicase DDX46 evidence Inferred from Electronic Annotation,term katanin p80 WD40 containing subunit B1 evidence Inferred from Electronic Annotation
2563	Smp_147460.1	32.44	23.16	0.468954	5.82273	TRINITY_DN18299_c0_g1; TRINITY_DN18299_c0_g2; TRINITY_DN38231_c0_g1	ceramidase evidence Inferred from Electronic Annotation
2564	Smp_212200.1	42.04	30.1	0.468763	6.19259	TRINITY_DN17801_c0_g2; TRINITY_DN45129_c0_g1	hypothetical protein evidence Inferred from Electronic Annotation
2565	Smp_136360.1	33.75	24.11	0.468751	5.87922	TRINITY_DN22465_c0_g1; TRINITY_DN22465_c0_g2; TRINITY_DN68590_c0_g1	DNA cross link repair 1A protein evidence Inferred from Electronic Annotation
2566	Smp_131660.1	16.96	11.98	0.468497	4.904	TRINITY_DN20194_c0_g1	COP9 signalosome complex subunit 5 evidence Inferred from Electronic Annotation
2567	Smp_156670.1	53.77	38.62	0.467157	6.5452	TRINITY_DN18275_c0_g1; TRINITY_DN18275_c0_g2; TRINITY_DN58733_c0_g1	DNA directed RNA polymerase II subunit RPB1 evidence Inferred from Electronic Annotation
2569	Smp_022470.1	98.05	70.69	0.466385	7.40718	TRINITY_DN18779_c1_g3; TRINITY_DN2757_c0_g1	DNA excision repair protein ERCC 1 evidence Inferred from Electronic Annotation
2570	Smp_245360.1	82.98	59.81	0.465737	7.16782	TRINITY_DN17603_c0_g1; TRINITY_DN21286_c0_g1	TBC domain containing protein kinase with InterPro:IPR000719 evidence Inferred from Sequence Model
2571	Smp_214040.1	14.55	10.26	0.465708	4.68986	TRINITY_DN18460_c0_g1	glycoprotein endo alpha 1%2C2 mannosidase evidence Inferred from Electronic Annotation
2573	Smp_087620.1	34.43	24.66	0.46545	5.90905	TRINITY_DN23739_c0_g2; TRINITY_DN23739_c0_g4	programmed cell death 6 interacting protein evidence Inferred from Electronic Annotation
2574	Smp_245000.1	41.95	30.11	0.46528	6.19101	TRINITY_DN21709_c0_g1	pre mRNA processing factor 6 evidence Inferred from Electronic Annotation
2575	Smp_145930.1	9.23	6.41	0.465261	4.05658	TRINITY_DN15118_c0_g1; TRINITY_DN15854_c0_g1; TRINITY_DN15854_c0_g3	matrix metalloproteinase 25 evidence Inferred from Electronic Annotation
2577	Smp_105040.1	23.88	17.03	0.464587	5.38922	TRINITY_DN21927_c0_g3; TRINITY_DN21927_c0_g4	CCR4 carbon catabolite repression 4 evidence Inferred from Electronic Annotation
2578	Smp_068960.2	51.44	37.02	0.463909	6.48317	TRINITY_DN21903_c1_g1; TRINITY_DN21903_c1_g2; TRINITY_DN58626_c0_g1	Serine:threonine protein kinase PRP4 evidence Inferred from Electronic Annotation
2579	Smp_149410.1	10.32	7.21	0.46342	4.21179	TRINITY_DN23742_c4_g4	hypothetical protein evidence Inferred from Electronic Annotation
2580	Smp_151030.1	122.93	88.9	0.463132	7.73356	TRINITY_DN19386_c0_g1	3 hydroxyacyl coenzyme A dehydrogenase type 2 evidence Inferred from Electronic Annotation
2581	Smp_120640.1	21.8	15.58	0.45959	5.26228	TRINITY_DN18055_c0_g1	hypothetical protein evidence Inferred from Electronic Annotation
2583	Smp_169990.2	109.11	79.19	0.457451	7.56453	TRINITY_DN20202_c0_g2	Golgi reassembly stacking protein 2 evidence Inferred from Electronic Annotation
2585	Smp_247330.1	59.3	42.93	0.456952	6.68972	TRINITY_DN17485_c0_g1; TRINITY_DN23091_c1_g1; TRINITY_DN23885_c3_g12; TRINITY_DN23885_c3_g30; TRINITY_DN4558_c0_g2	roundabout 2 with InterPro:IPR013783 evidence Inferred from Sequence Model
2588	Smp_008545.1	811	590.84	0.456273	10.4541	TRINITY_DN19321_c0_g2	heat shock protein 60 with UniProtKB:Q8MXA4 evidence Non-traceable Author Statemen
2590	Smp_084080.1	55.55	40.26	0.454783	6.59708	TRINITY_DN22479_c0_g2	peptidyl prolyl cis trans isomerase CWC27 evidence Inferred from Electronic Annotation
2591	Smp_142850.1	10.03	7.05	0.454372	4.17632	TRINITY_DN23334_c0_g2	Stromal membrane associated protein 1 evidence Inferred from Electronic Annotation
2593	Smp_139650.1	25.52	18.37	0.453257	5.48832	TRINITY_DN23365_c0_g1	hypothetical protein evidence Inferred from Electronic Annotation
2594	Smp_018530.1	3011.19	2199.75	0.452818	12.3476	TRINITY_DN18289_c0_g1	nascent polypeptide associated complex subunit evidence Inferred from Electronic Annotation
2595	Smp_089700.1	19.46	13.95	0.452661	5.10476	TRINITY_DN23095_c0_g1	integrin beta 2 db_xref PMID:25827755 evidence Traceable Author Statemen
2597	Smp_212540.1	25.3	18.23	0.451704	5.47671	TRINITY_DN19092_c0_g1	suppression of tumorigenicity evidence Inferred from Electronic Annotation
2599	Smp_246140.1	65.2	47.46	0.450037	6.82858	TRINITY_DN22668_c0_g2	v type proton atpase subunit h evidence Inferred from Electronic Annotation
2600	Smp_094880.1	57.8	42.05	0.449803	6.65607	TRINITY_DN21350_c0_g1	glucan ( alpha) branching enzyme alpha glucan branching enzyme evidence Inferred from Electronic Annotation
2601	Smp_194770.1	14.5	10.35	0.449576	4.69209	TRINITY_DN17889_c0_g1	taurocyamine kinase creatine kinase arginine kinase evidence Inferred from Electronic Annotation
2603	Smp_026090.1	49.86	36.26	0.448904	6.44493	TRINITY_DN18958_c1_g1	ras gtp binding protein d evidence Inferred from Electronic Annotation
2604	Smp_176840.1	49.23	35.81	0.448452	6.42694	TRINITY_DN20617_c0_g1; TRINITY_DN42152_c0_g1	u4:u6 evidence Inferred from Electronic Annotation
2605	Smp_147950.2	193.44	141.55	0.447857	8.39227	TRINITY_DN22639_c1_g1; TRINITY_DN22639_c1_g3	-
2606	Smp_092880.1	14.86	10.63	0.447542	4.72738	TRINITY_DN20052_c0_g1; TRINITY_DN20052_c0_g2	single stranded DNA binding protein 3 evidence Inferred from Electronic Annotation
2608	Smp_213950.1	14.54	10.4	0.446953	4.69711	TRINITY_DN16736_c0_g1; TRINITY_DN19693_c0_g1	citron Rho interacting kinase evidence Inferred from Electronic Annotation
2609	Smp_027970.1	44.24	32.2	0.446416	6.27501	TRINITY_DN20440_c1_g1; TRINITY_DN20440_c1_g2; TRINITY_DN20440_c1_g3	pre mRNA splicing factor ATP dependent evidence Inferred from Electronic Annotation
2611	Smp_056370.1	191.52	140.33	0.445941	8.37873	TRINITY_DN23042_c0_g1	deoxyhypusine hydroxylase:monooxygenase evidence Inferred from Electronic Annotation
2612	Smp_069670.1	21.2	15.31	0.444803	5.2292	TRINITY_DN23482_c4_g3; TRINITY_DN23482_c4_g5	vacuolar protein sorting (vps33) evidence Inferred from Electronic Annotation
2613	Smp_245200.1	13.21	9.44	0.444785	4.56377	TRINITY_DN11180_c0_g2; TRINITY_DN12884_c0_g1; TRINITY_DN17644_c1_g1	asparagine synthetase domain containing protein evidence Inferred from Electronic Annotation
2614	Smp_120920.1	29.42	21.35	0.444745	5.69404	TRINITY_DN17333_c0_g1	hypothetical protein evidence Inferred from Electronic Annotation
2615	Smp_174390.1	94.86	69.43	0.444739	7.36886	TRINITY_DN18877_c0_g1; TRINITY_DN18877_c0_g2	serine threonine kinase receptor associated evidence Inferred from Electronic Annotation
2616	Smp_016130.1	87.58	64.09	0.444545	7.25427	TRINITY_DN21464_c0_g2	mitochondrial import inner membrane translocase evidence Inferred from Electronic Annotation
2617	Smp_136710.2	29.96	21.77	0.443271	5.72055	TRINITY_DN22699_c0_g1; TRINITY_DN23369_c1_g4; TRINITY_DN68633_c0_g1	calcium transporting atpase evidence Inferred from Electronic Annotation
2618	Smp_173140.1	58.86	43.03	0.443105	6.68496	TRINITY_DN1153_c0_g3; TRINITY_DN1153_c0_g4; TRINITY_DN17021_c0_g1; TRINITY_DN21252_c7_g14; TRINITY_DN21252_c7_g2; TRINITY_DN22962_c0_g2	subfamily M3A non peptidase ue evidence Inferred from Electronic Annotation
2619	Smp_156880.1	32.63	23.74	0.442903	5.84222	TRINITY_DN10812_c0_g1; TRINITY_DN23612_c0_g2	protein transport protein sec24c evidence Inferred from Electronic Annotation
2621	Smp_136260.1	28.65	20.83	0.44172	5.65764	TRINITY_DN22195_c0_g1	Glutamine:fructose 6 phosphate aminotransferase evidence Inferred from Electronic Annotation
2622	Smp_017810.1	64.8	47.48	0.440698	6.82375	TRINITY_DN14980_c0_g1; TRINITY_DN15457_c0_g1; TRINITY_DN15457_c0_g2; TRINITY_DN15457_c0_g3; TRINITY_DN15459_c0_g1; TRINITY_DN15459_c1_g1; TRINITY_DN27382_c0_g1; TRINITY_DN41981_c0_g1; TRINITY_DN42975_c0_g1; TRINITY_DN48724_c0_g1; TRINITY_DN57086_c0_g1; TRINITY_DN71069_c0_g1	-
2623	Smp_068120.1	11.47	8.19	0.440325	4.36877	TRINITY_DN22027_c0_g1	aryl hydrocarbon receptor interacting evidence Inferred from Electronic Annotation
2625	Smp_136520.1	12.32	8.82	0.439799	4.46858	TRINITY_DN23572_c0_g1	general transcription factor IIH subunit 2 evidence Inferred from Electronic Annotation
2626	Smp_161750.1	91.63	67.31	0.439383	7.32139	TRINITY_DN21204_c0_g3; TRINITY_DN58801_c0_g1	splicing factor 45 evidence Inferred from Electronic Annotation
2628	Smp_048620.1	39.52	28.92	0.437524	6.1177	TRINITY_DN21624_c0_g3	exosome complex component RRP45 evidence Inferred from Electronic Annotation
2630	Smp_243600.1	57.52	42.22	0.437231	6.65449	TRINITY_DN22956_c5_g4; TRINITY_DN23084_c1_g12; TRINITY_DN23084_c1_g13; TRINITY_DN23084_c1_g19; TRINITY_DN23084_c1_g2; TRINITY_DN23902_c14_g14; TRINITY_DN23902_c14_g28; TRINITY_DN23902_c14_g30; TRINITY_DN23902_c14_g32; TRINITY_DN23902_c14_g5; TRINITY_DN23902_c14_g6; TRINITY_DN55877_c0_g1	multiple pdz domain protein evidence Inferred from Electronic Annotation
2631	Smp_082800.1	52.35	38.41	0.436927	6.51979	TRINITY_DN20484_c0_g2	vesicle protein sorting associated evidence Inferred from Electronic Annotation
2632	Smp_007900.1	8756.04	6468.63	0.43676	13.8942	TRINITY_DN21131_c0_g1; TRINITY_DN21131_c0_g2; TRINITY_DN21131_c0_g3	large subunit ribosomal protein 23 evidence Inferred from Electronic Annotation
2633	Smp_009030.1	82.01	60.45	0.433872	7.1645	TRINITY_DN21453_c0_g1; TRINITY_DN21453_c0_g2; TRINITY_DN21453_c0_g3; TRINITY_DN21453_c0_g4; TRINITY_DN21453_c0_g5; TRINITY_DN6208_c1_g1	ribonucleoside diphosphate reductase large evidence Inferred from Electronic Annotation
2637	Smp_074650.1	18.25	13.26	0.432884	5.02281	TRINITY_DN23820_c0_g5	Schistosoma protein%2C unknown function evidence Inferred from Electronic Annotation
2639	Smp_137000.1	75.48	55.67	0.432497	7.04603	TRINITY_DN22123_c0_g2; TRINITY_DN44344_c0_g1	solute carrier family 25 0 evidence Inferred from Electronic Annotation
2640	Smp_004730.1	488.43	361.67	0.432445	9.73318	TRINITY_DN23019_c6_g4; TRINITY_DN23019_c6_g6; TRINITY_DN46336_c0_g1	high voltage-activated calcium channel cav2b db_xref PMID:11719960 evidence Traceable Author Statemen
2641	Smp_140200.1	13.54	9.78	0.43167	4.60407	TRINITY_DN22218_c2_g1; TRINITY_DN22218_c2_g2	flowering locus c variant evidence Inferred from Electronic Annotation
2642	Smp_053230.1	69.55	51.44	0.427978	6.93062	TRINITY_DN22212_c3_g4	cytochrome b reductase evidence Inferred from Electronic Annotation
2643	Smp_244780.1	18.99	13.86	0.427844	5.08108	TRINITY_DN15864_c0_g1; TRINITY_DN17493_c0_g2; TRINITY_DN18585_c0_g1	GC rich sequence DNA binding factor evidence Inferred from Electronic Annotation
2644	Smp_002510.1	28.08	20.62	0.427661	5.63517	TRINITY_DN10914_c0_g1; TRINITY_DN10914_c0_g2; TRINITY_DN23203_c2_g1; TRINITY_DN42675_c0_g1	pyruvate dehydrogenase (lipoamide) evidence Inferred from Electronic Annotation
2645	Smp_169330.1	27.62	20.28	0.427526	5.61176	TRINITY_DN21931_c0_g1; TRINITY_DN22116_c5_g1	nuclear pore complex protein nup155 evidence Inferred from Electronic Annotation
2646	Smp_139030.1	10.43	7.5	0.427291	4.2426	TRINITY_DN18764_c1_g3; TRINITY_DN23574_c0_g1; TRINITY_DN3257_c0_g1; TRINITY_DN46664_c0_g1	protein FAM172A evidence Inferred from Electronic Annotation
2647	Smp_133020.1	82.7	61.25	0.427154	7.17941	TRINITY_DN18050_c1_g2	p38 MAP kinase MPK2 protein evidence Inferred from Electronic Annotation
2650	Smp_079760.2	37.3	27.51	0.425876	6.04023	TRINITY_DN19572_c0_g1	integrin linked protein kinase evidence Inferred from Electronic Annotation
2651	Smp_170630.1	26.08	19.16	0.425732	5.53107	TRINITY_DN23085_c0_g1	Periostin%2C putative evidence Inferred by Curato
2653	Smp_210380.1	27.25	20.04	0.425116	5.59365	TRINITY_DN20649_c0_g1	nucleotide binding protein 2 (nbp 2) evidence Inferred from Electronic Annotation
2654	Smp_151070.1	30.3	22.32	0.424595	5.7447	TRINITY_DN11988_c0_g2; TRINITY_DN21721_c0_g1	transcription elongation factor spt5 evidence Inferred from Electronic Annotation
2655	Smp_036590.1	124.02	92.24	0.423138	7.76328	TRINITY_DN14855_c0_g1	Regulator of differentiation 1 evidence Inferred from Electronic Annotation
2656	Smp_085310.1	125.27	93.21	0.42256	7.77795	TRINITY_DN21312_c0_g1	26S proteasome regulatory subunit S3 evidence Inferred from Electronic Annotation
2657	Smp_138920.2	20.52	15.06	0.422206	5.19298	TRINITY_DN20078_c0_g1; TRINITY_DN58972_c0_g1	COP9 signalosome complex subunit evidence Inferred from Electronic Annotation
2658	Smp_102070.1	1687.09	1258.99	0.42198	11.5251	TRINITY_DN16727_c0_g1; TRINITY_DN42438_c0_g1	glutathione S-transferase class-mu 26 kDa isozyme db_xref PMID:1775156 evidence Traceable Author Statemen
2659	Smp_093370.1	78.29	58.19	0.421785	7.10308	TRINITY_DN23087_c0_g1	hypothetical protein evidence Inferred from Electronic Annotation
2660	Smp_129820.1	101.11	75.23	0.421693	7.47037	TRINITY_DN17688_c1_g1; TRINITY_DN22655_c0_g1; TRINITY_DN22655_c0_g2; TRINITY_DN31759_c0_g1; TRINITY_DN6851_c0_g1	ATP binding cassette%2C sub family C (CFTR:MRP) evidence Inferred from Electronic Annotation
2661	Smp_104870.1	104.6	77.87	0.421061	7.5194	TRINITY_DN15527_c0_g2; TRINITY_DN21013_c0_g4; TRINITY_DN22998_c0_g2; TRINITY_DN23284_c1_g15; TRINITY_DN23284_c1_g3; TRINITY_DN23284_c1_g4; TRINITY_DN42348_c0_g1; TRINITY_DN6517_c0_g1; TRINITY_DN71045_c0_g1	pleiotropic regulator 1 evidence Inferred from Electronic Annotation
2663	Smp_139080.1	14.73	10.76	0.419631	4.72738	TRINITY_DN21519_c0_g2	bestrophin evidence Inferred from Electronic Annotation
2665	Smp_078310.1	12.8	9.32	0.419225	4.53107	TRINITY_DN18518_c0_g1	ran binding protein evidence Inferred from Electronic Annotation
2666	Smp_089460.2	67.11	49.94	0.419068	6.88325	TRINITY_DN23832_c0_g10; TRINITY_DN34780_c0_g1; TRINITY_DN40613_c0_g1; TRINITY_DN8702_c0_g1	calpain A evidence Inferred from Electronic Annotation
2667	Smp_149950.1	29.53	21.84	0.418665	5.71067	TRINITY_DN22697_c1_g1; TRINITY_DN22697_c2_g1	dephospho coenzyme A related kinases evidence Inferred from Electronic Annotation
2668	Smp_241730.1	25.63	18.94	0.417387	5.51001	TRINITY_DN15220_c0_g1; TRINITY_DN15220_c0_g2; TRINITY_DN1529_c0_g1; TRINITY_DN16419_c0_g1; TRINITY_DN16419_c0_g2; TRINITY_DN22361_c0_g10; TRINITY_DN29774_c0_g1; TRINITY_DN40443_c0_g1; TRINITY_DN62474_c0_g1	hypothetical protein evidence Inferred from Electronic Annotation
2669	Smp_044160.1	68.98	51.41	0.417101	6.92351	TRINITY_DN21303_c1_g1	S adenosylmethionine mitochondrial carrier evidence Inferred from Electronic Annotation
2670	Smp_038080.1	73.09	54.49	0.417051	7.00652	TRINITY_DN17313_c0_g1; TRINITY_DN21253_c0_g1	importin subunit beta 1 evidence Inferred from Electronic Annotation
2671	Smp_152000.1	14.7	10.76	0.416876	4.72574	TRINITY_DN19231_c0_g1; TRINITY_DN24350_c0_g2; TRINITY_DN39047_c0_g1	ubiquitin carboxyl terminal hydrolase 8 evidence Inferred from Electronic Annotation
2672	Smp_246860.1	25.45	18.83	0.415583	5.5008	TRINITY_DN22364_c0_g4	Alkylated repair protein alkB 4 evidence Inferred from Electronic Annotation
2673	Smp_199120.1	68.84	51.37	0.415313	6.92136	TRINITY_DN10003_c0_g1; TRINITY_DN21938_c0_g2	protein FAM114A2 evidence Inferred from Electronic Annotation
2674	Smp_212910.1	42.74	31.8	0.415257	6.23917	TRINITY_DN18089_c0_g2	nuclear pore complex protein Nup43 evidence Inferred from Sequence or Structural Similarity
2675	Smp_161730.1	65.56	48.92	0.415037	6.8515	TRINITY_DN14632_c0_g1; TRINITY_DN22845_c0_g1; TRINITY_DN22845_c0_g3; TRINITY_DN45273_c0_g1	U2 snRNP associated SURP motif containing evidence Inferred from Electronic Annotation
2677	Smp_082570.1	4175.62	3135.25	0.413295	12.836	TRINITY_DN16908_c0_g1	Zinc finger CDGSH domain containing protein 1 evidence Inferred from Electronic Annotation
2678	Smp_157810.1	20.93	15.49	0.411314	5.22574	TRINITY_DN15284_c0_g1	39S ribosomal protein L37%2C mitochondrial evidence Inferred from Electronic Annotation
2679	Smp_244210.1	61.47	46	0.410503	6.76115	TRINITY_DN23454_c0_g2; TRINITY_DN501_c0_g1	-
2681	Smp_000820.1	49.28	36.85	0.409691	6.4451	TRINITY_DN21424_c0_g2	hypothetical protein evidence Inferred from Electronic Annotation
2682	Smp_054800.1	58.51	43.81	0.409311	6.69098	TRINITY_DN23151_c0_g1	glycerophosphocholine phosphodiesterase GPCPD1 evidence Inferred from Electronic Annotation
2683	Smp_042430.2	16.16	11.93	0.408327	4.86245	TRINITY_DN16954_c1_g1	dna replication complex gins protein sld5 evidence Inferred from Electronic Annotation
2684	Smp_041600.1	32.1	23.95	0.407791	5.83415	TRINITY_DN23250_c0_g1	isoleucyl tRNA synthetase%2C cytoplasmic evidence Inferred from Electronic Annotation
2687	Smp_158580.1	86.19	64.81	0.405856	7.24793	TRINITY_DN15831_c0_g1	transmembrane protein 39a evidence Inferred from Electronic Annotation
2688	Smp_093580.1	17.53	12.99	0.405467	4.9782	TRINITY_DN19837_c0_g1	ATP dependent RNA helicase DHX35 evidence Inferred from Electronic Annotation
2690	Smp_138770.1	60.92	45.8	0.403897	6.75114	TRINITY_DN14058_c0_g1; TRINITY_DN14058_c0_g2; TRINITY_DN20904_c1_g1; TRINITY_DN20904_c1_g2; TRINITY_DN20904_c1_g3; TRINITY_DN20904_c1_g4; TRINITY_DN24497_c0_g1; TRINITY_DN24497_c0_g2; TRINITY_DN34816_c0_g1; TRINITY_DN62292_c0_g1; TRINITY_DN66207_c0_g1	histone deacetylase 6 evidence Inferred from Electronic Annotation
2691	Smp_196150.1	28.34	21.19	0.402959	5.65907	TRINITY_DN17500_c1_g1; TRINITY_DN22610_c0_g1	selenoprotein o evidence Inferred from Electronic Annotation
2693	Smp_153870.1	13.71	10.13	0.402344	4.63459	TRINITY_DN151_c0_g1; TRINITY_DN151_c0_g2; TRINITY_DN20044_c0_g1; TRINITY_DN8228_c0_g2	serine:threonine protein kinase ULK4 evidence Inferred from Electronic Annotation
2694	Smp_132960.1	32.74	24.53	0.402266	5.86468	TRINITY_DN23069_c0_g3	hypothetical protein evidence Inferred from Electronic Annotation
2697	Smp_019030.1	412.4	311.89	0.401883	9.50241	TRINITY_DN21713_c1_g2; TRINITY_DN22539_c0_g1	Cathepsin C with UniProtKB:Q26563 evidence Traceable Author Statemen
2698	Smp_244830.1	41.03	30.83	0.401032	6.18706	TRINITY_DN20976_c0_g1	hypothetical protein evidence Inferred from Electronic Annotation
2699	Smp_054310.1	23.03	17.2	0.400898	5.36562	TRINITY_DN20341_c0_g1	membrane bound transcription factor site 2 evidence Inferred from Electronic Annotation
2700	Smp_150340.1	21	15.67	0.400249	5.23534	TRINITY_DN13881_c0_g1; TRINITY_DN23340_c0_g1; TRINITY_DN23340_c0_g4	solute carrier family 16 evidence Inferred from Electronic Annotation
2701	Smp_132620.2	39.31	29.55	0.399965	6.12639	TRINITY_DN22378_c0_g1; TRINITY_DN22378_c0_g4	transmembrane gtpase mfn (mitofusin 1) (fzo evidence Inferred from Electronic Annotation
2702	Smp_089930.1	9.83	7.21	0.399579	4.17313	TRINITY_DN23521_c0_g3; TRINITY_DN4400_c0_g1	serine:threonine protein phosphatase 2A evidence Inferred from Electronic Annotation
2703	Smp_015880.1	34.74	26.12	0.398182	5.95093	TRINITY_DN22146_c0_g1; TRINITY_DN2240_c1_g1	hypothetical protein evidence Inferred from Electronic Annotation
2704	Smp_123620.1	15.88	11.81	0.398044	4.84248	TRINITY_DN22914_c1_g2	hypothetical protein evidence Inferred from Electronic Annotation
2705	Smp_247710.1	13.65	10.12	0.397744	4.63052	TRINITY_DN17382_c0_g1; TRINITY_DN21314_c0_g3; TRINITY_DN38543_c0_g1; TRINITY_DN71185_c0_g1	Activating signal cointegrator 1 complex subunit evidence Inferred from Electronic Annotation
2706	Smp_120360.1	42.79	32.24	0.397681	6.2485	TRINITY_DN14611_c0_g1; TRINITY_DN18845_c0_g1; TRINITY_DN45965_c0_g1	superkiller viralicidic activity 2 2 like evidence Inferred from Electronic Annotation
2707	Smp_171890.2	83.97	63.5	0.397654	7.21403	TRINITY_DN19862_c0_g2	histidine protein methyltransferase 1 evidence Inferred from Electronic Annotation
2708	Smp_048880.1	239.14	181.32	0.397403	8.71925	TRINITY_DN21746_c0_g1	hypothetical protein evidence Inferred from Electronic Annotation
2709	Smp_022310.1	123.31	93.46	0.396167	7.76666	TRINITY_DN16391_c0_g1; TRINITY_DN21360_c1_g1; TRINITY_DN21360_c1_g3; TRINITY_DN48662_c0_g1	SWI:SNF matrix associated evidence Inferred from Electronic Annotation
2710	Smp_152940.1	10.01	7.37	0.395515	4.20006	TRINITY_DN16584_c0_g1; TRINITY_DN16584_c0_g2; TRINITY_DN16584_c0_g3; TRINITY_DN16584_c0_g4; TRINITY_DN17469_c0_g1	otopetrin evidence Inferred from Electronic Annotation
2711	Smp_019860.1	250.3	190.29	0.393649	8.78656	TRINITY_DN19686_c0_g1	ankyrin repeat family A protein 2 evidence Inferred from Electronic Annotation
2713	Smp_247650.1	151.62	115.4	0.390853	8.0662	TRINITY_DN10677_c0_g1; TRINITY_DN10677_c0_g2; TRINITY_DN16247_c0_g1; TRINITY_DN19319_c0_g2; TRINITY_DN19319_c0_g3; TRINITY_DN22644_c0_g11; TRINITY_DN22644_c0_g14; TRINITY_DN22644_c0_g7; TRINITY_DN23895_c7_g12; TRINITY_DN23895_c7_g5; TRINITY_DN23895_c7_g7; TRINITY_DN36896_c1_g1	eukaryotic translation initiation factor 3 evidence Inferred from Electronic Annotation
2714	Smp_171160.1	63.99	48.57	0.39075	6.82731	TRINITY_DN12433_c0_g1; TRINITY_DN20161_c0_g1; TRINITY_DN23967_c0_g2; TRINITY_DN34392_c0_g1; TRINITY_DN36037_c0_g1; TRINITY_DN9363_c0_g1	paired amphipathic helix protein Sin3a evidence Inferred from Electronic Annotation
2715	Smp_049500.1	115.76	88.12	0.389725	7.67864	TRINITY_DN19724_c10_g1; TRINITY_DN19724_c10_g8; TRINITY_DN22309_c2_g1; TRINITY_DN22634_c0_g2; TRINITY_DN22634_c0_g3; TRINITY_DN3760_c0_g1	ATP binding cassette sub family F evidence Inferred from Electronic Annotation
2716	Smp_169640.1	18.86	14.16	0.389596	5.08831	TRINITY_DN13415_c0_g1	nuclear pore complex protein Nup54 evidence Inferred from Electronic Annotation
2717	Smp_170570.1	33.06	25.01	0.389012	5.88435	TRINITY_DN23616_c0_g2; TRINITY_DN23616_c0_g3; TRINITY_DN23616_c0_g4; TRINITY_DN23616_c0_g5	pre mRNA processing factor 39 evidence Inferred from Electronic Annotation
2718	Smp_070310.1	12.16	9.06	0.387529	4.47379	TRINITY_DN22660_c0_g1	ecotropic viral integration site 5 protein evidence Inferred from Electronic Annotation
2719	Smp_030150.1	18.89	14.21	0.387023	5.0917	TRINITY_DN18336_c0_g2; TRINITY_DN59151_c0_g1	hypothetical protein evidence Inferred from Electronic Annotation
2720	Smp_142220.1	10.9	8.1	0.387023	4.32193	TRINITY_DN23710_c2_g10; TRINITY_DN23710_c2_g11; TRINITY_DN23710_c2_g6	apobec1 complementation factor evidence Inferred from Electronic Annotation
2721	Smp_139160.1	1646.9	1259.61	0.386507	11.5056	TRINITY_DN23700_c0_g10; TRINITY_DN23700_c0_g11; TRINITY_DN23700_c0_g14; TRINITY_DN23700_c0_g15; TRINITY_DN23700_c0_g16; TRINITY_DN23700_c0_g3; TRINITY_DN23700_c0_g6	cathepsin L db_xref PMID:8577349 evidence Traceable Author Statemen
2722	Smp_213640.1	17.97	13.52	0.385678	5.02192	TRINITY_DN20478_c0_g1	hypothetical protein evidence Inferred from Electronic Annotation
2723	Smp_157660.1	32.54	24.68	0.385237	5.86344	TRINITY_DN10284_c0_g1; TRINITY_DN23134_c0_g2	ATP dependent rRNA helicase RRP3 evidence Inferred from Electronic Annotation
2725	Smp_068720.1	29.83	22.61	0.384937	5.73985	TRINITY_DN23242_c0_g2	Formin Homology 2 Domain containing protein db_xref PMID:19746159 evidence Traceable Author Statemen
2726	Smp_210750.1	64.16	48.91	0.384658	6.83378	TRINITY_DN15155_c0_g1	peptidyl prolyl cis trans isomerase evidence Inferred from Electronic Annotation
2728	Smp_051070.1	9.21	6.83	0.382899	4.09085	TRINITY_DN18380_c0_g2	protein DGCR6 evidence Inferred from Electronic Annotation
2729	Smp_170130.1	9.6	7.13	0.382737	4.14812	TRINITY_DN25923_c0_g1; TRINITY_DN47153_c0_g1; TRINITY_DN59817_c0_g1	fos transcription factor evidence Inferred from Electronic Annotation
2730	Smp_163420.1	31.35	23.82	0.382263	5.81173	TRINITY_DN18873_c0_g2; TRINITY_DN20561_c0_g2	protein kinase evidence Inferred from Electronic Annotation
2732	Smp_059130.1	29.08	22.09	0.381536	5.70515	TRINITY_DN22014_c0_g2; TRINITY_DN22870_c0_g1; TRINITY_DN6467_c0_g1	CAP Gly domain containing linker protein 2 evidence Inferred from Electronic Annotation
2733	Smp_091650.1	21.95	16.62	0.38128	5.30634	TRINITY_DN19200_c0_g1; TRINITY_DN19200_c0_g2; TRINITY_DN19200_c0_g3; TRINITY_DN40884_c0_g1; TRINITY_DN67088_c0_g1; TRINITY_DN7719_c0_g1	phospholipid transporting ATPase IIB evidence Inferred from Electronic Annotation
2734	Smp_170540.1	13.93	10.47	0.380349	4.66676	TRINITY_DN1458_c0_g1; TRINITY_DN20759_c0_g1	arginine glutamic acid dipeptide (RE) repeats evidence Inferred from Electronic Annotation
2735	Smp_246580.1	11.56	8.65	0.380236	4.40667	TRINITY_DN21728_c0_g1	hypothetical protein
2737	Smp_003000.1	39.11	29.87	0.377756	6.12887	TRINITY_DN23798_c1_g1	cyclin dependent kinase 9 evidence Inferred from Electronic Annotation
2738	Smp_014730.1	14.91	11.25	0.377152	4.76341	TRINITY_DN21128_c0_g1	hypothetical protein evidence Inferred from Electronic Annotation
2740	Smp_037400.1	20.31	15.43	0.375198	5.19928	TRINITY_DN18519_c0_g1; TRINITY_DN19417_c0_g1	cell division cycle protein 23 evidence Inferred from Electronic Annotation
2742	Smp_213680.1	15.95	12.08	0.373923	4.85947	TRINITY_DN18715_c0_g1; TRINITY_DN19900_c0_g2	replication factor c subunit 1 evidence Inferred from Electronic Annotation
2743	Smp_029310.1	10.66	8	0.373571	4.29719	TRINITY_DN23723_c0_g1	phosphatidylinositol transfer protein evidence Inferred from Electronic Annotation
2744	Smp_028080.1	16.43	12.46	0.372894	4.90159	TRINITY_DN20930_c0_g1	serine palmitoyltransferase 1
2745	Smp_033760.1	119.93	92.44	0.37206	7.73721	TRINITY_DN22434_c0_g1; TRINITY_DN22434_c0_g2	hypothetical protein evidence Inferred from Electronic Annotation
2748	Smp_154230.1	16.92	12.86	0.370643	4.94392	TRINITY_DN15566_c0_g1	immunoglobulin binding protein 1 evidence Inferred from Electronic Annotation
2750	Smp_156160.1	15.98	12.14	0.369871	4.86394	TRINITY_DN14966_c0_g1; TRINITY_DN20167_c0_g1; TRINITY_DN24656_c0_g1	WD repeat containing protein 7 evidence Inferred from Electronic Annotation
2751	Smp_016050.1	36.97	28.39	0.369535	6.05224	TRINITY_DN19509_c0_g1	Fragile X mental retardation protein 1 evidence Inferred from Electronic Annotation
2753	Smp_126690.1	45.04	34.64	0.36939	6.33414	TRINITY_DN20516_c0_g2	COP9 signalosome complex subunit 6 evidence Inferred from Electronic Annotation
2754	Smp_244690.1	48.32	37.19	0.368978	6.4348	TRINITY_DN11878_c0_g1; TRINITY_DN11878_c0_g2; TRINITY_DN11878_c0_g3	palmitoyltransferase zdhhc6 evidence Inferred from Electronic Annotation
2755	Smp_124110.1	24.84	19.01	0.368885	5.48704	TRINITY_DN21477_c0_g1; TRINITY_DN65387_c0_g1	kanadaptin evidence Inferred from Electronic Annotation
2756	Smp_210400.1	109.79	84.87	0.367602	7.61221	TRINITY_DN14084_c0_g1	ATP dependent Clp protease proteolytic subunit evidence Inferred from Electronic Annotation
2757	Smp_164160.1	23.55	18.05	0.365932	5.41278	TRINITY_DN23646_c0_g3	tumor differentially expressed protein evidence Inferred from Electronic Annotation
2758	Smp_056810.1	68.11	52.65	0.365316	6.9279	TRINITY_DN21577_c0_g1	heterogeneous nuclear ribonucleoprotein evidence Inferred from Electronic Annotation
2759	Smp_033660.1	40.88	31.52	0.364934	6.19771	TRINITY_DN17948_c0_g1	N acetylglucosamine 6 phosphate evidence Inferred from Electronic Annotation
2760	Smp_152140.1	9.27	6.98	0.363976	4.10852	TRINITY_DN19141_c0_g3; TRINITY_DN22956_c2_g1	late secretory pathway protein avl9 evidence Inferred from Electronic Annotation
2761	Smp_039080.1	34.44	26.55	0.363326	5.95396	TRINITY_DN23299_c1_g1; TRINITY_DN23299_c1_g2	FRA10AC1 protein evidence Inferred from Electronic Annotation
2762	Smp_063650.3	188.17	146.09	0.362984	8.38914	TRINITY_DN17672_c0_g1	transcription initiation factor TFIIB evidence Inferred from Electronic Annotation
2763	Smp_247520.1	35.34	27.26	0.362797	5.99095	TRINITY_DN23467_c0_g1	-
2765	Smp_066630.1	85.73	66.46	0.362499	7.25918	TRINITY_DN16756_c0_g1; TRINITY_DN16756_c0_g2	eukaryotic peptide chain release factor subunit evidence Inferred from Electronic Annotation
2766	Smp_121810.1	14.84	11.33	0.3614	4.76394	TRINITY_DN23113_c0_g1	protein shq1 evidence Inferred from Electronic Annotation
2767	Smp_142960.1	132.45	102.88	0.361381	7.88466	TRINITY_DN22724_c0_g1	glutathione synthetase evidence Inferred from Electronic Annotation
2768	Smp_048240.1	24.89	19.18	0.359469	5.4941	TRINITY_DN22241_c0_g3; TRINITY_DN22241_c0_g4	mannose 1 phosphate guanyltransferase evidence Inferred from Electronic Annotation
2771	Smp_158450.1	14.59	11.16	0.358478	4.74147	TRINITY_DN19812_c2_g2; TRINITY_DN23274_c0_g6; TRINITY_DN23274_c0_g8; TRINITY_DN23885_c3_g17; TRINITY_DN23895_c7_g4; TRINITY_DN36041_c0_g1; TRINITY_DN6649_c0_g1	kelch protein 12 evidence Inferred from Electronic Annotation
2772	Smp_061870.1	139.12	108.3	0.358369	7.95664	TRINITY_DN16620_c0_g1; TRINITY_DN45860_c0_g1	ubiquinol cytochrome c reductase%2C Rieske evidence Inferred from Electronic Annotation
2773	Smp_157520.1	23.75	18.31	0.35808	5.42828	TRINITY_DN16216_c0_g1; TRINITY_DN22304_c2_g1	zinc finger protein zas shn zinc finger protein evidence Inferred from Electronic Annotation
2774	Smp_141290.4	231.47	180.39	0.35795	8.68951	TRINITY_DN21663_c0_g2	innexin evidence Inferred from Electronic Annotation
2775	Smp_194160.1	37.7	29.2	0.357785	6.08534	TRINITY_DN15589_c0_g1; TRINITY_DN9079_c0_g1	leucyl tRNA synthetase%2C cytoplasmic evidence Inferred from Electronic Annotation
2776	Smp_141450.2	33.01	25.55	0.357247	5.89627	TRINITY_DN21798_c1_g2	Serine protease 5 db_xref PMID:24676141 evidence Traceable Author Statemen
2777	Smp_064050.2	121.64	94.77	0.356784	7.76427	TRINITY_DN19363_c0_g1; TRINITY_DN21389_c1_g1	ruvb reptin and pontin evidence Inferred from Electronic Annotation
2778	Smp_026260.1	60.72	47.23	0.355807	6.76752	TRINITY_DN20113_c0_g1	RING finger protein 185 evidence Inferred from Electronic Annotation
2779	Smp_155420.1	61.7	48.01	0.355389	6.79064	TRINITY_DN19345_c0_g1; TRINITY_DN19524_c0_g2	thioredoxin domain containing protein 11 evidence Inferred from Electronic Annotation
2781	Smp_071610.1	87.2	67.99	0.354391	7.28716	TRINITY_DN22824_c0_g2	Lysosomal Pro X carboxypeptidase evidence Inferred from Electronic Annotation
2782	Smp_246420.1	11.06	8.44	0.353371	4.35755	TRINITY_DN14448_c0_g1; TRINITY_DN20592_c0_g5; TRINITY_DN20592_c0_g6; TRINITY_DN8123_c0_g1	-
2783	Smp_059910.1	36.84	28.62	0.35334	6.05441	TRINITY_DN9194_c0_g1	serine:threonine protein phosphatase PGAM5 evidence Inferred from Electronic Annotation
2784	Smp_213900.1	13.98	10.73	0.352835	4.68426	TRINITY_DN21997_c0_g4; TRINITY_DN21997_c0_g5; TRINITY_DN34150_c0_g1	type IV collagen alpha 1 chain evidence Inferred from Electronic Annotation
2785	Smp_128350.1	55.42	43.19	0.352487	6.63822	TRINITY_DN16240_c0_g1; TRINITY_DN16240_c0_g2	PR domain zinc finger protein 1 evidence Inferred from Electronic Annotation
2786	Smp_039180.2	52.68	41.06	0.351936	6.5659	TRINITY_DN21761_c0_g2	nuclear protein localization protein 4 evidence Inferred from Electronic Annotation
2787	Smp_126800.1	50.28	39.18	0.351919	6.49921	TRINITY_DN14922_c0_g1; TRINITY_DN64996_c0_g1; TRINITY_DN64996_c0_g2	rho GTPase activating protein 39 evidence Inferred from Electronic Annotation
2788	Smp_047110.1	55.73	43.53	0.349334	6.6476	TRINITY_DN20514_c0_g1	ATP dependent RNA helicase DDX52 evidence Inferred from Electronic Annotation
2789	Smp_247030.1	95.51	74.78	0.348861	7.4203	TRINITY_DN16283_c0_g1; TRINITY_DN16775_c0_g2; TRINITY_DN23019_c6_g5; TRINITY_DN23019_c6_g7; TRINITY_DN34680_c0_g1; TRINITY_DN5678_c0_g2	protocadherin gamma evidence Inferred from Electronic Annotation
2790	Smp_019690.1	95.75	74.97	0.348832	7.42391	TRINITY_DN10020_c0_g1	splicing factor u2af 65 kda subunit evidence Inferred from Electronic Annotation
2792	Smp_084770.1	8.71	6.63	0.347788	4.03034	TRINITY_DN23057_c0_g1	nuclear factor related to kappa B binding evidence Inferred from Electronic Annotation
2793	Smp_076660.1	18.38	14.23	0.347653	5.07082	TRINITY_DN16873_c0_g2	DNA polymerase delta small subunit evidence Inferred from Electronic Annotation
2794	Smp_211040.1	16.6	12.85	0.345689	4.92837	TRINITY_DN16768_c0_g1	protein phosphatase methylesterase 1 evidence Inferred from Electronic Annotation
2795	Smp_010770.2	74.49	58.41	0.34558	7.06501	TRINITY_DN23618_c1_g7	elongation of very long chain fatty acids evidence Inferred from Electronic Annotation
2796	Smp_148440.1	37.57	29.36	0.345307	6.08598	TRINITY_DN19866_c0_g1; TRINITY_DN19866_c0_g2; TRINITY_DN19866_c0_g3	PCI domain containing protein 2 evidence Inferred from Electronic Annotation
2797	Smp_180370.1	44.57	34.9	0.344101	6.33038	TRINITY_DN21817_c0_g1	nucleolar protein 10 evidence Inferred from Electronic Annotation
2798	Smp_165330.1	17.31	13.43	0.34356	4.98823	TRINITY_DN22099_c0_g1; TRINITY_DN22099_c0_g2; TRINITY_DN22099_c0_g4	GPN loop GTPase 2 evidence Inferred from Electronic Annotation
2799	Smp_033710.1	53.94	42.31	0.343157	6.60363	TRINITY_DN20891_c0_g1	vasa-like DEAD-box RNA helicase db_xref PMID:22720105 evidence Traceable Author Statemen
2800	Smp_027910.1	59.05	46.38	0.341886	6.73376	TRINITY_DN23084_c1_g15; TRINITY_DN23279_c0_g2	Synembryn A evidence Inferred from Electronic Annotation
2801	Smp_243910.1	69.59	54.7	0.341786	6.96913	TRINITY_DN22977_c0_g1	transmembrane 9 superfamily protein member%2C putative evidence Inferred from Electronic Annotation
2802	Smp_044250.1	45.47	35.67	0.341699	6.36001	TRINITY_DN21630_c2_g1	STAM binding protein evidence Inferred from Electronic Annotation
2803	Smp_158090.1	17.32	13.46	0.341352	4.99005	TRINITY_DN22186_c0_g4	BTB:POZ domain containing protein 12 evidence Inferred from Electronic Annotation
2804	Smp_152570.1	37.56	29.44	0.341137	6.08746	TRINITY_DN10488_c0_g1; TRINITY_DN10488_c0_g2; TRINITY_DN13330_c0_g2; TRINITY_DN13848_c0_g1; TRINITY_DN21070_c1_g8; TRINITY_DN23885_c3_g13; TRINITY_DN28009_c0_g1; TRINITY_DN47810_c0_g1	hypothetical protein evidence Inferred from Electronic Annotation
2805	Smp_176060.1	43.5	34.13	0.341102	6.29701	TRINITY_DN10756_c0_g1; TRINITY_DN11212_c0_g1; TRINITY_DN11212_c0_g2; TRINITY_DN11609_c0_g2; TRINITY_DN1998_c0_g1; TRINITY_DN1998_c0_g2; TRINITY_DN21158_c0_g1; TRINITY_DN25005_c0_g1; TRINITY_DN25132_c0_g1; TRINITY_DN38946_c0_g1; TRINITY_DN54608_c0_g1; TRINITY_DN56628_c0_g1; TRINITY_DN70178_c0_g1	e3 ubiquitin protein ligase ubr2 evidence Inferred from Electronic Annotation
2806	Smp_164590.1	32.98	25.84	0.340301	5.90256	TRINITY_DN20073_c0_g1; TRINITY_DN20114_c0_g2; TRINITY_DN20527_c0_g1; TRINITY_DN20527_c0_g2; TRINITY_DN20527_c0_g3; TRINITY_DN20527_c0_g4; TRINITY_DN32430_c0_g1; TRINITY_DN59616_c0_g1; TRINITY_DN60827_c0_g1	fibrillar collagen chain FAp1 alpha evidence Inferred from Electronic Annotation
2807	Smp_213020.1	11.91	9.2	0.33992	4.46663	TRINITY_DN12656_c0_g1; TRINITY_DN15532_c0_g1; TRINITY_DN17490_c0_g1	hypothetical protein evidence Inferred from Electronic Annotation
2808	Smp_011150.1	115.09	90.79	0.338835	7.69265	TRINITY_DN20517_c0_g2	threonine aspartase 1 evidence Inferred from Electronic Annotation
2810	Smp_153210.1	12.44	9.63	0.338392	4.52795	TRINITY_DN21265_c0_g2	rhodopsin orphan GPCR evidence Inferred from Electronic Annotation
2811	Smp_145630.1	86.25	68.01	0.33835	7.27854	TRINITY_DN17279_c0_g3	protein SSXT evidence Inferred from Electronic Annotation
2812	Smp_175680.1	101.93	80.42	0.338208	7.51846	TRINITY_DN19511_c0_g2	survival motor neuron protein 1 evidence Inferred from Electronic Annotation
2813	Smp_045780.1	23.55	18.42	0.33818	5.42526	TRINITY_DN23394_c0_g1	ubiquitin modifier activating enzyme 5 evidence Inferred from Electronic Annotation
2814	Smp_032800.2	146.78	115.93	0.337806	8.04281	TRINITY_DN1487_c0_g1; TRINITY_DN19461_c1_g3; TRINITY_DN38870_c0_g1; TRINITY_DN39114_c0_g1	WD40 repeat containing protein SMU1 evidence Inferred from Electronic Annotation
2815	Smp_248200.1	22.73	17.78	0.337515	5.37539	TRINITY_DN16485_c0_g1	hypothetical protein
2816	Smp_123000.2	8.65	6.64	0.336956	4.02591	TRINITY_DN13032_c0_g1; TRINITY_DN65_c1_g1	ski oncogene evidence Inferred from Electronic Annotation
2817	Smp_096640.1	13.46	10.45	0.33672	4.63865	TRINITY_DN23332_c0_g1	hypothetical protein evidence Inferred from Electronic Annotation
2818	Smp_094950.1	52.54	41.4	0.336553	6.56894	TRINITY_DN20252_c0_g2; TRINITY_DN56361_c0_g1; TRINITY_DN7413_c0_g1	transmembrane and TPR repeat containing protein evidence Inferred from Electronic Annotation
2819	Smp_129720.1	32.74	25.72	0.33654	5.89385	TRINITY_DN21913_c0_g1	Poly U binding splicing factor half pint evidence Inferred from Electronic Annotation
2821	Smp_140890.1	100.14	79.14	0.335759	7.4941	TRINITY_DN16699_c1_g2; TRINITY_DN16699_c1_g3; TRINITY_DN19315_c0_g1; TRINITY_DN22706_c0_g1; TRINITY_DN22706_c0_g2; TRINITY_DN22706_c0_g3; TRINITY_DN9939_c0_g1	pre mRNA processing splicing factor 8 evidence Inferred from Electronic Annotation
2822	Smp_101290.1	18.04	14.09	0.335441	5.05007	TRINITY_DN22538_c0_g1	actin protein 2%2C arp2 evidence Inferred from Electronic Annotation
2823	Smp_096530.1	43.02	33.9	0.334932	6.28392	TRINITY_DN22049_c1_g1	DEAD box ATP dependent RNA helicase evidence Inferred from Electronic Annotation
2825	Smp_025440.1	44.53	35.11	0.334419	6.33342	TRINITY_DN23031_c0_g3; TRINITY_DN23031_c0_g5	protein fat free evidence Inferred from Electronic Annotation
2826	Smp_213850.1	30.29	23.83	0.333617	5.7845	TRINITY_DN18805_c0_g2	hypothetical protein evidence Inferred from Electronic Annotation
2827	Smp_068300.1	42.27	33.36	0.332637	6.25984	TRINITY_DN19113_c0_g1	ring finger and FYVE domain containing 1 evidence Inferred from Electronic Annotation
2828	Smp_073410.1	1108.46	880.04	0.332578	10.9582	TRINITY_DN17704_c0_g1; TRINITY_DN60095_c0_g1	proteasome subunit beta type 7 evidence Inferred from Electronic Annotation
2829	Smp_159150.2	28.15	22.15	0.332484	5.68089	TRINITY_DN12321_c0_g1; TRINITY_DN23833_c2_g21; TRINITY_DN44581_c0_g1; TRINITY_DN59267_c0_g1; TRINITY_DN68597_c0_g1; TRINITY_DN9236_c0_g1; TRINITY_DN9236_c0_g2; TRINITY_DN9236_c0_g3	hypothetical protein evidence Inferred from Electronic Annotation
2830	Smp_146310.1	11.39	8.84	0.332446	4.40803	TRINITY_DN20281_c0_g1	three prime repair exonuclease 1 evidence Inferred from Electronic Annotation
2832	Smp_097090.1	69.16	54.77	0.331159	6.96498	TRINITY_DN21243_c0_g1	a kinase anchor protein 1 mitochondrial evidence Inferred from Electronic Annotation
2833	Smp_122840.1	540.94	429.93	0.33068	9.92462	TRINITY_DN19996_c0_g1	Eukaryotic translation initiation factor 5 with UniProtKB:Q9NJD1 evidence Non-traceable Author Statemen
2834	Smp_176290.1	13.53	10.56	0.329893	4.64904	TRINITY_DN20942_c0_g1	tyrosyl tRNA synthetase evidence Inferred from Electronic Annotation
2836	Smp_159120.1	9.04	6.99	0.329492	4.09001	TRINITY_DN18803_c0_g1; TRINITY_DN18803_c0_g2	family C48 unassigned peptidase (C48 family) evidence Inferred from Electronic Annotation
2837	Smp_012030.2	31.65	25	0.328571	5.84925	TRINITY_DN15442_c0_g2	zinc finger protein 407 evidence Inferred from Electronic Annotation
2838	Smp_127100.1	118.38	94.07	0.328499	7.73775	TRINITY_DN21974_c0_g1	yrdC domain containing protein evidence Inferred from Electronic Annotation
2839	Smp_027040.1	25.86	20.41	0.327175	5.56285	TRINITY_DN22261_c0_g1; TRINITY_DN22261_c1_g1	hypothetical protein evidence Inferred from Electronic Annotation
2841	Smp_013060.1	9.82	7.63	0.326268	4.20555	TRINITY_DN15971_c0_g1; TRINITY_DN15971_c0_g2; TRINITY_DN6862_c0_g1	smad family member 1
2842	Smp_048160.1	9.44	7.33	0.325733	4.15137	TRINITY_DN17389_c0_g1; TRINITY_DN28554_c0_g1; TRINITY_DN52156_c0_g1	rna recognition motif protein split ends evidence Inferred from Electronic Annotation
2844	Smp_209030.1	31.34	24.82	0.324831	5.83693	TRINITY_DN209_c0_g1; TRINITY_DN21115_c0_g2; TRINITY_DN57465_c0_g1	DNA polymerase epsilon catalytic subunit evidence Inferred from Electronic Annotation
2845	Smp_172830.1	99.05	78.88	0.324815	7.48325	TRINITY_DN14680_c0_g1; TRINITY_DN23327_c0_g1	Dyp type peroxidase evidence Inferred from Electronic Annotation
2846	Smp_146030.1	17.67	13.91	0.324442	5.02591	TRINITY_DN17464_c0_g1	tRNA specific adenosine deaminase protein evidence Inferred from Electronic Annotation
2847	Smp_030020.1	55.39	44.04	0.324233	6.65005	TRINITY_DN18573_c0_g2	hypothetical protein evidence Inferred from Electronic Annotation
2848	Smp_024150.1	69.04	54.97	0.323525	6.9659	TRINITY_DN21415_c0_g1; TRINITY_DN21415_c0_g2	UBX domain containing protein 2 evidence Inferred from Electronic Annotation
2849	Smp_031860.1	88.64	70.66	0.322975	7.32463	TRINITY_DN22351_c0_g1	coatomer subunit delta evidence Inferred from Electronic Annotation
2850	Smp_103540.1	74.76	59.58	0.322595	7.08044	TRINITY_DN21130_c0_g1	transcription factor AP 4 evidence Inferred from Electronic Annotation
2853	Smp_124460.1	45.23	35.99	0.321694	6.36142	TRINITY_DN18266_c0_g1	ATP binding cassette sub family E evidence Inferred from Electronic Annotation
2854	Smp_138520.1	13	10.21	0.320641	4.59753	TRINITY_DN22456_c0_g4; TRINITY_DN23891_c2_g1; TRINITY_DN23895_c7_g2	potassium channel modulatory factor 1 evidence Inferred from Electronic Annotation
2855	Smp_026310.1	9.57	7.47	0.319542	4.17313	TRINITY_DN19072_c0_g1; TRINITY_DN19072_c0_g2	trans enoyl coenzyme reductase (nadph) mitochondrial trans enoyl coenzyme reductase evidence Inferred from Electronic Annotation
2857	Smp_134060.1	28.94	23	0.31904	5.72629	TRINITY_DN18405_c0_g1; TRINITY_DN18405_c0_g3	WD repeat and SOF domain containing protein 1 evidence Inferred from Electronic Annotation
2858	Smp_135120.1	33.58	26.72	0.319011	5.93782	TRINITY_DN15844_c0_g1; TRINITY_DN20852_c0_g2	ribosome biogenesis protein bop1 evidence Inferred from Electronic Annotation
2859	Smp_038980.2	56.64	45.21	0.318865	6.6844	TRINITY_DN23049_c0_g2	deoxynucleotidyltransferase terminal interacting evidence Inferred from Electronic Annotation
2860	Smp_092320.1	23.31	18.5	0.318076	5.41988	TRINITY_DN10315_c0_g1; TRINITY_DN17877_c0_g1	RNA polymerase II elongation factor ELL evidence Inferred from Electronic Annotation
2861	Smp_248140.1	53.25	42.53	0.317613	6.59664	TRINITY_DN19796_c0_g1	hypothetical protein evidence Inferred from Electronic Annotation
2862	Smp_073510.1	81.77	65.45	0.316839	7.2116	TRINITY_DN20745_c0_g1	dual specificity mitogen activated protein evidence Inferred from Electronic Annotation
2865	Smp_048310.1	49.11	39.28	0.315035	6.48204	TRINITY_DN22281_c1_g1; TRINITY_DN67456_c0_g1	sulfite oxidase%2C mitochondrial evidence Inferred from Electronic Annotation
2866	Smp_160140.1	21.41	17.02	0.314544	5.30122	TRINITY_DN12756_c0_g1	hypothetical protein evidence Inferred from Electronic Annotation
2867	Smp_045420.1	8.5	6.64	0.314355	4.01257	TRINITY_DN23801_c4_g1	adipor receptor evidence Inferred from Electronic Annotation
2868	Smp_139510.1	17.35	13.76	0.314087	5.00495	TRINITY_DN15257_c0_g1; TRINITY_DN23393_c1_g6; TRINITY_DN50002_c0_g1	tuftelin interacting protein 11 evidence Inferred from Electronic Annotation
2869	Smp_041060.1	8.46	6.61	0.313944	4.0063	TRINITY_DN22173_c0_g1	Septin 4 with UniProtKB:S5XLH6 evidence Inferred from Electronic Annotation
2870	Smp_164380.1	30.26	24.15	0.313759	5.79207	TRINITY_DN1295_c0_g1; TRINITY_DN49657_c0_g1; TRINITY_DN61473_c0_g1; TRINITY_DN7266_c0_g1; TRINITY_DN7266_c0_g2	protein KINase family member (kin 1) evidence Inferred from Electronic Annotation
2871	Smp_203970.1	137	110.12	0.31255	7.95489	TRINITY_DN18597_c0_g1	transmembrane and coiled coil domain containing protein evidence Inferred from Electronic Annotation
2872	Smp_175900.1	38.11	30.5	0.312186	6.12122	TRINITY_DN22232_c0_g1	synaptotagmin evidence Inferred from Electronic Annotation
2873	Smp_154320.1	20.04	15.95	0.311849	5.20906	TRINITY_DN21757_c0_g1	vasa-like ATP dependent DEAD-box RNA helicase db_xref PMID:22720105 evidence Traceable Author Statemen
2874	Smp_174990.1	10.89	8.58	0.311651	4.35544	TRINITY_DN22486_c0_g3	endo beta N acetylglucosaminidase evidence Inferred from Electronic Annotation
2875	Smp_135830.1	40.66	32.57	0.31149	6.21393	TRINITY_DN21486_c0_g1	hypothetical protein evidence Inferred from Electronic Annotation
2876	Smp_078900.1	42.76	34.28	0.310762	6.28614	TRINITY_DN21456_c0_g2; TRINITY_DN45199_c0_g1	histone lysine N methyltransferase E(z) evidence Inferred from Electronic Annotation
2877	Smp_055400.1	331.05	266.74	0.310568	9.22591	TRINITY_DN20232_c1_g3	tubulin folding cofactor B evidence Inferred from Electronic Annotation
2878	Smp_125800.1	18.28	14.55	0.31019	5.08023	TRINITY_DN18667_c0_g1	26S proteasome non ATPase regulatory subunit evidence Inferred from Electronic Annotation
2881	Smp_033590.1	61.78	49.68	0.308889	6.81327	TRINITY_DN23819_c1_g1; TRINITY_DN23819_c1_g2; TRINITY_DN23819_c1_g4	ring finger protein 113a evidence Inferred from Electronic Annotation
2882	Smp_089630.1	48.35	38.87	0.307746	6.46303	TRINITY_DN22708_c0_g1	polyglutamine binding protein evidence Inferred from Electronic Annotation
2883	Smp_144930.1	363.74	293.73	0.307475	9.36297	TRINITY_DN13719_c1_g1; TRINITY_DN23053_c0_g3	elongator complex protein 1 evidence Inferred from Electronic Annotation
2884	Smp_163430.1	41.34	33.23	0.30676	6.23974	TRINITY_DN20098_c0_g1	hypothetical protein evidence Inferred from Electronic Annotation
2886	Smp_051410.1	8.84	6.96	0.30589	4.07039	TRINITY_DN20319_c0_g1; TRINITY_DN8802_c0_g1	claudin protein septate junction protein evidence Inferred from Electronic Annotation
2887	Smp_161110.2	10.27	8.12	0.305382	4.27724	TRINITY_DN17294_c0_g1; TRINITY_DN35881_c0_g1; TRINITY_DN7922_c0_g1	FH1:FH2 domain containing protein 3 evidence Inferred from Electronic Annotation
2888	Smp_128130.1	40.06	32.23	0.305247	6.19554	TRINITY_DN21800_c0_g1; TRINITY_DN21800_c0_g3	phosphatidylinositol 3 kinase catalytic subunit evidence Inferred from Electronic Annotation
2889	Smp_030300.2	119.68	96.69	0.304904	7.76401	TRINITY_DN22738_c1_g1	-
2890	Smp_064390.1	12.02	9.54	0.304855	4.4957	TRINITY_DN20574_c0_g1	protein TSSC4 evidence Inferred from Electronic Annotation
2891	Smp_045960.1	72.66	58.64	0.304601	7.04767	TRINITY_DN23661_c1_g2; TRINITY_DN23661_c1_g4; TRINITY_DN23661_c1_g8; TRINITY_DN5964_c0_g2; TRINITY_DN9395_c0_g1	Calcium binding atopy autoantigen 1 evidence Inferred from Electronic Annotation
2892	Smp_180020.1	18.16	14.52	0.303969	5.07382	TRINITY_DN25554_c0_g1	centromere protein j evidence Inferred from Electronic Annotation
2893	Smp_246900.1	53.68	43.3	0.303707	6.61442	TRINITY_DN19214_c0_g1	RNA polymerase I associated factor%2C A49-like with InterPro:IPR009668 evidence Inferred from Sequence Model
2894	Smp_091840.1	25.32	20.33	0.303276	5.54381	TRINITY_DN18575_c0_g1	bestrophin 2 evidence Inferred from Electronic Annotation
2895	Smp_060480.1	9.72	7.69	0.302877	4.20242	TRINITY_DN16357_c0_g1	copine 9 evidence Inferred from Electronic Annotation
2896	Smp_213160.1	32.74	26.36	0.302392	5.90929	TRINITY_DN17667_c0_g1	TP53-regulating kinase evidence Inferred from Electronic Annotation
2897	Smp_082860.1	43.21	34.86	0.301997	6.30506	TRINITY_DN19045_c0_g1	tryptophanyl tRNA synthetase evidence Inferred from Electronic Annotation
2898	Smp_160460.1	9.49	7.51	0.301784	4.16993	TRINITY_DN19724_c4_g1	zinc finger protein 541 evidence Inferred from Electronic Annotation
2899	Smp_140640.1	60.49	48.92	0.300734	6.78673	TRINITY_DN19852_c0_g1; TRINITY_DN19852_c0_g4	Tel2 interacting protein 1 evidence Inferred from Electronic Annotation
2900	Smp_090820.1	12.77	10.18	0.300608	4.58195	TRINITY_DN19077_c6_g3; TRINITY_DN22218_c1_g1	CDP diacylglycerol glycerol 3 phosphate evidence Inferred from Electronic Annotation
2901	Smp_019440.1	1173.19	952.62	0.300179	11.0545	TRINITY_DN20500_c0_g1	protein translation factor sui1 evidence Inferred from Electronic Annotation
2902	Smp_244000.1	10.73	8.53	0.299655	4.34056	TRINITY_DN23098_c0_g3; TRINITY_DN35033_c0_g1	regulator of G protein signaling 3 evidence Inferred from Electronic Annotation
2905	Smp_128360.1	14.44	11.55	0.298985	4.75435	TRINITY_DN17120_c0_g1; TRINITY_DN41445_c0_g1	NADP dependent malic enzyme evidence Inferred from Electronic Annotation
2906	Smp_013040.1	433.97	352.75	0.298186	9.62154	TRINITY_DN21336_c0_g1	cathepsin d (lysosomal aspartyl protease) db_xref PMID:9128134 evidence Traceable Author Statemen
2907	Smp_143560.1	74.73	60.59	0.298169	7.09085	TRINITY_DN15037_c0_g1	hypothetical protein evidence Inferred from Electronic Annotation
2909	Smp_098710.1	58.19	47.16	0.297518	6.73268	TRINITY_DN21526_c0_g2; TRINITY_DN22657_c0_g1	quiescin q6 sulfhydryl oxidase evidence Inferred from Electronic Annotation
2911	Smp_062980.1	11.21	8.94	0.296745	4.40259	TRINITY_DN23477_c0_g4	CD9 antigen evidence Inferred from Electronic Annotation
2913	Smp_209040.1	23.73	19.14	0.296199	5.45516	TRINITY_DN20718_c0_g1	long chain fatty acid coenzyme A ligase evidence Inferred from Electronic Annotation
2914	Smp_146180.1	32.58	26.36	0.295534	5.90545	TRINITY_DN19808_c0_g1	lipase 1 ,term sterol esterase 1 ,term sterol esterase 2 ,term lysosomal acid lipase-related
2915	Smp_144970.1	39.28	31.82	0.295488	6.17193	TRINITY_DN12635_c0_g1; TRINITY_DN12635_c0_g2; TRINITY_DN12635_c0_g4; TRINITY_DN15201_c0_g1; TRINITY_DN15201_c0_g2; TRINITY_DN15201_c0_g3; TRINITY_DN15201_c0_g4; TRINITY_DN23478_c0_g2; TRINITY_DN23885_c3_g3; TRINITY_DN38320_c0_g1	copper transporting ATPase 1 evidence Inferred from Electronic Annotation
2916	Smp_060290.1	100.22	81.6	0.293281	7.51428	TRINITY_DN19248_c0_g1	josephin protein like evidence Inferred from Electronic Annotation
2917	Smp_080180.1	52.98	43.07	0.292628	6.60066	TRINITY_DN23245_c0_g3; TRINITY_DN68035_c1_g1	Ras association (RalGDS:AF 6) domain family evidence Inferred from Electronic Annotation
2919	Smp_007770.1	9.87	7.88	0.29172	4.22882	TRINITY_DN14880_c0_g1; TRINITY_DN22910_c0_g1	ubiquitin conjugating enzyme e2 o evidence Inferred from Electronic Annotation
2920	Smp_170350.1	23.86	19.31	0.291636	5.46499	TRINITY_DN17836_c0_g1; TRINITY_DN23874_c6_g11	g protein coupled receptor evidence Inferred from Electronic Annotation
2922	Smp_165760.1	28.48	23.1	0.290703	5.71644	TRINITY_DN17283_c0_g1; TRINITY_DN57238_c0_g1	IQ domain containing protein evidence Inferred from Electronic Annotation
2923	Smp_167010.1	61.92	50.44	0.290628	6.82477	TRINITY_DN17886_c0_g1; TRINITY_DN2091_c0_g1; TRINITY_DN2381_c1_g1; TRINITY_DN25548_c0_g1; TRINITY_DN28570_c0_g1; TRINITY_DN33222_c0_g1	talin 2 evidence Inferred from Electronic Annotation
2924	Smp_045200.1	857.34	700.85	0.290387	10.6066	TRINITY_DN21783_c2_g2; TRINITY_DN21783_c2_g3; TRINITY_DN21783_c2_g4	tegument-allergen-like protein evidence Inferred from Experiment,term tegument antigen
2925	Smp_168340.1	42.72	34.8	0.288334	6.29499	TRINITY_DN17506_c0_g3	protein cramped evidence Inferred from Electronic Annotation
2926	Smp_179320.1	35.09	28.56	0.287953	6.01458	TRINITY_DN23183_c0_g4; TRINITY_DN23183_c0_g5	argonaute 2-1 db_xref PMID:23426263 evidence Traceable Author Statemen
2927	Smp_000300.1	105.35	86.12	0.287744	7.58849	TRINITY_DN22490_c0_g1	WD repeat containing protein 19 evidence Inferred from Electronic Annotation
2929	Smp_203280.1	2439.52	1999.01	0.287181	12.1162	TRINITY_DN15705_c0_g1	ATP synthase coupling factor 6%2C mitochondrial evidence Inferred from Electronic Annotation
2930	Smp_066420.1	18.52	15	0.286881	5.10936	TRINITY_DN12638_c0_g2; TRINITY_DN16712_c0_g2; TRINITY_DN22766_c1_g4; TRINITY_DN22766_c1_g5; TRINITY_DN45404_c0_g1	hypothetical protein evidence Inferred from Electronic Annotation
2932	Smp_129560.1	25.82	20.99	0.286462	5.57924	TRINITY_DN14946_c0_g1	hypothetical protein evidence Inferred from Electronic Annotation
2933	Smp_026820.1	18.16	14.72	0.285496	5.08236	TRINITY_DN22671_c2_g1; TRINITY_DN23019_c6_g10; TRINITY_DN23019_c6_g19; TRINITY_DN23019_c6_g8; TRINITY_DN5356_c0_g1; TRINITY_DN5356_c0_g2; TRINITY_DN68881_c0_g1	Centrosomal protein of 135 kDa (Cep135 protein) evidence Inferred from Electronic Annotation
2936	Smp_069840.1	231.36	189.7	0.285057	8.7213	TRINITY_DN19685_c0_g1	ankyrin repeat domain containing protein 49 evidence Inferred from Electronic Annotation
2938	Smp_019890.2	60.9	49.86	0.283408	6.80426	TRINITY_DN22353_c1_g1	-
2939	Smp_128160.1	42.17	34.51	0.281804	6.27947	TRINITY_DN23397_c2_g2; TRINITY_DN57191_c0_g1	CST complex subunit STN1 evidence Inferred from Electronic Annotation
2940	Smp_033700.1	12.06	9.75	0.280818	4.51159	TRINITY_DN18477_c0_g2	deoxyribodipyrimidine photo lyase evidence Inferred from Electronic Annotation
2941	Smp_076630.1	35.35	28.93	0.280363	6.02857	TRINITY_DN18587_c4_g4; TRINITY_DN20176_c0_g1	nonsense mediated mrna decay protein evidence Inferred from Electronic Annotation
2942	Smp_212850.1	82.52	67.77	0.280342	7.24117	TRINITY_DN21205_c0_g1; TRINITY_DN21205_c0_g3	Mername AA168 protein (M67 family) evidence Inferred from Electronic Annotation
2943	Smp_006440.1	51.67	42.42	0.278622	6.57122	TRINITY_DN23029_c0_g1; TRINITY_DN23029_c0_g4; TRINITY_DN23029_c0_g5	heterogeneous nuclear ribonucleoprotein l evidence Inferred from Electronic Annotation
2944	Smp_033260.2	37.86	31.04	0.278412	6.12722	TRINITY_DN22946_c0_g1	sentrin specific protease 1 evidence Inferred from Electronic Annotation
2945	Smp_039490.3	31.55	25.84	0.278273	5.86765	TRINITY_DN22569_c0_g1; TRINITY_DN22569_c1_g1	DNA binding SAP%2Cdomain containing protein evidence Inferred from Electronic Annotation
2946	Smp_072360.1	15.51	12.62	0.277613	4.86443	TRINITY_DN18062_c0_g4; TRINITY_DN21175_c0_g1; TRINITY_DN21175_c0_g2	splicing factor%2C arginine:serine rich 17A evidence Inferred from Electronic Annotation
2948	Smp_243200.1	21.06	17.21	0.276702	5.29536	TRINITY_DN18994_c0_g1; TRINITY_DN18994_c0_g2	calpain 7 (C02 family) evidence Inferred from Electronic Annotation
2949	Smp_093280.1	32.15	26.39	0.27536	5.89579	TRINITY_DN19085_c0_g1	histone deacetylase 3
2950	Smp_243960.1	11.47	9.31	0.274417	4.44493	TRINITY_DN10092_c0_g1; TRINITY_DN15841_c0_g1; TRINITY_DN21052_c0_g1; TRINITY_DN66866_c0_g1; TRINITY_DN71635_c0_g1	signal induced proliferation associated 1 evidence Inferred from Electronic Annotation
2951	Smp_186670.1	11.42	9.27	0.274229	4.43896	TRINITY_DN18563_c0_g1; TRINITY_DN21373_c1_g1; TRINITY_DN33658_c0_g1; TRINITY_DN44703_c0_g1	aspartate carbamoyltransferase evidence Inferred from Electronic Annotation
2952	Smp_164130.1	36.99	30.42	0.273937	6.09614	TRINITY_DN21285_c0_g1; TRINITY_DN22913_c0_g2; TRINITY_DN4641_c0_g1; TRINITY_DN4803_c0_g2; TRINITY_DN56968_c0_g1; TRINITY_DN68115_c0_g1	protein dopey 1 evidence Inferred from Electronic Annotation
2954	Smp_083540.1	35.47	29.18	0.273117	6.03672	TRINITY_DN23685_c0_g1; TRINITY_DN50319_c0_g1	Myotubularin protein 2 evidence Inferred from Electronic Annotation
2955	Smp_171770.1	15.53	12.68	0.273018	4.86839	TRINITY_DN20886_c0_g2	hypothetical protein evidence Inferred from Electronic Annotation
2956	Smp_196840.1	70.23	58.03	0.271037	7.01413	TRINITY_DN17853_c0_g1; TRINITY_DN17853_c0_g2; TRINITY_DN2079_c0_g1; TRINITY_DN31657_c0_g1; TRINITY_DN52286_c0_g1; TRINITY_DN66204_c0_g1; TRINITY_DN762_c0_g1; TRINITY_DN762_c0_g2; TRINITY_DN9476_c0_g1	collagen alpha 1(II) chain evidence Inferred from Electronic Annotation
2957	Smp_045250.1	19.59	16.07	0.270481	5.19613	TRINITY_DN20414_c0_g1; TRINITY_DN20414_c0_g2	cleavage stimulation factor subunit 1 evidence Inferred from Electronic Annotation
2958	Smp_175580.1	12.88	10.51	0.27012	4.60822	TRINITY_DN11428_c0_g1; TRINITY_DN24204_c0_g1; TRINITY_DN62823_c0_g1	hypothetical protein evidence Inferred from Electronic Annotation
2959	Smp_150980.1	30.77	25.36	0.269315	5.83618	TRINITY_DN18093_c0_g1; TRINITY_DN21808_c0_g1; TRINITY_DN37312_c0_g1; TRINITY_DN47255_c0_g1; TRINITY_DN63383_c0_g1	P53 inducible protein evidence Inferred from Electronic Annotation
2960	Smp_136040.1	15.33	12.55	0.269232	4.852	TRINITY_DN16574_c0_g1; TRINITY_DN32595_c0_g1	dual specificity protein phosphatase 16 evidence Inferred from Electronic Annotation
2961	Smp_047620.1	9.11	7.39	0.26904	4.12928	TRINITY_DN5572_c0_g1; TRINITY_DN5572_c0_g2; TRINITY_DN8714_c0_g1	G2:mitotic specific cyclin B3 evidence Inferred from Electronic Annotation
2962	Smp_067940.1	46.09	38.1	0.268252	6.41261	TRINITY_DN23254_c0_g1; TRINITY_DN59283_c1_g1	hypothetical protein evidence Inferred from Electronic Annotation
2963	Smp_246880.1	15.76	12.93	0.266827	4.89191	TRINITY_DN21737_c0_g1; TRINITY_DN24270_c0_g1; TRINITY_DN68896_c0_g1	von Willebrand factor A domain containing protein evidence Inferred from Electronic Annotation
2964	Smp_155780.1	12.69	10.38	0.266622	4.58916	TRINITY_DN13604_c0_g2; TRINITY_DN13604_c0_g4; TRINITY_DN17310_c0_g1; TRINITY_DN20070_c0_g1; TRINITY_DN20070_c0_g3; TRINITY_DN63488_c0_g1	gtpase activating protein evidence Inferred from Electronic Annotation
2965	Smp_176420.1	31.41	25.95	0.266154	5.86691	TRINITY_DN15751_c0_g1	ras guanine nucleotide exchange factor evidence Inferred from Electronic Annotation
2966	Smp_135790.1	189.82	157.75	0.265456	8.4453	TRINITY_DN12682_c0_g1; TRINITY_DN21168_c0_g1; TRINITY_DN21168_c0_g3; TRINITY_DN21168_c0_g4; TRINITY_DN23411_c0_g1; TRINITY_DN23411_c0_g5; TRINITY_DN23411_c0_g7	Intersectin 1 evidence Inferred from Electronic Annotation
2967	Smp_052790.1	46.75	38.75	0.264546	6.43463	TRINITY_DN22454_c1_g1; TRINITY_DN22454_c1_g2	serologically defined colon cancer antigen 1 evidence Inferred from Electronic Annotation
2968	Smp_081380.1	182.87	152.08	0.2644	8.3921	TRINITY_DN21730_c2_g10	hypothetical protein evidence Inferred from Electronic Annotation
2969	Smp_001610.1	36.04	29.85	0.263814	6.06372	TRINITY_DN20779_c0_g1	radial spoke head protein 9 evidence Inferred from Electronic Annotation
2970	Smp_087340.1	19.71	16.25	0.263731	5.20789	TRINITY_DN22585_c0_g1	hypothetical protein evidence Inferred from Electronic Annotation
2972	Smp_245020.1	21.87	18.06	0.262908	5.35509	TRINITY_DN17957_c0_g1; TRINITY_DN67266_c0_g1	hypothetical protein evidence Inferred from Electronic Annotation
2973	Smp_019260.1	64.96	53.99	0.262422	6.90629	TRINITY_DN22646_c0_g1	multiple ankyrin repeats single kh domain evidence Inferred from Electronic Annotation
2974	Smp_198970.1	15.9	13.09	0.262352	4.90641	TRINITY_DN20538_c0_g1; TRINITY_DN20538_c0_g2	Phospholipase A2 evidence Inferred from Electronic Annotation
2975	Smp_089180.1	169.49	141.16	0.262172	8.28378	TRINITY_DN17142_c0_g1; TRINITY_DN17142_c0_g2; TRINITY_DN17142_c0_g3; TRINITY_DN17142_c0_g4; TRINITY_DN17523_c0_g1	Deubiquitinating enzyme 7 with UniProtKB:A5GXR8 evidence Non-traceable Author Statemen
2977	Smp_059540.1	20.82	17.21	0.26092	5.28651	TRINITY_DN22902_c0_g1	signal recognition particle 54 kda protein evidence Inferred from Electronic Annotation
2978	Smp_168050.1	76.31	63.52	0.260909	7.13781	TRINITY_DN16699_c1_g4; TRINITY_DN16916_c0_g1; TRINITY_DN16916_c0_g2; TRINITY_DN23891_c8_g31; TRINITY_DN23895_c7_g3; TRINITY_DN23909_c19_g17; TRINITY_DN55974_c0_g1	long chain fatty acid coenzyme A ligase evidence Inferred from Electronic Annotation
2979	Smp_201220.1	30.15	25	0.260721	5.81121	TRINITY_DN11416_c0_g1	casein kinase I delta evidence Inferred from Electronic Annotation
2982	Smp_034700.3	125.83	104.91	0.260057	7.85636	TRINITY_DN17834_c0_g1	protein SCO1%2C mitochondrial evidence Inferred from Electronic Annotation
2983	Smp_011680.1	45.69	38.04	0.258161	6.4048	TRINITY_DN22240_c0_g1; TRINITY_DN32119_c0_g1	CD36 class B scavenger receptor evidence Inferred from Electronic Annotation
2984	Smp_132980.2	191.62	160.15	0.257353	8.46258	TRINITY_DN19628_c0_g1; TRINITY_DN20168_c0_g1; TRINITY_DN23909_c19_g12; TRINITY_DN23909_c19_g19; TRINITY_DN28944_c0_g1; TRINITY_DN4945_c0_g1; TRINITY_DN70845_c0_g1	hypothetical protein evidence Inferred from Electronic Annotation
2985	Smp_042670.1	15.2	12.56	0.256637	4.84599	TRINITY_DN19368_c0_g1; TRINITY_DN19368_c0_g3	dna mismatch repair protein msh6 evidence Inferred from Electronic Annotation
2986	Smp_035260.1	50.41	42.04	0.256371	6.54612	TRINITY_DN19232_c2_g3	epidermal growth factor receptor kinase evidence Inferred from Electronic Annotation
2987	Smp_024580.2	32.21	26.81	0.256014	5.90737	TRINITY_DN18837_c0_g1	mannosyl oligosaccharide glucosidase evidence Inferred from Electronic Annotation
2988	Smp_013540.1	752.02	629.69	0.255757	10.4333	TRINITY_DN17559_c0_g1	Tyrosinase evidence Inferred from Electronic Annotation
2989	Smp_003340.1	20.43	16.95	0.255648	5.26228	TRINITY_DN16319_c0_g1; TRINITY_DN46482_c0_g1	hypothetical protein evidence Inferred from Electronic Annotation
2990	Smp_158380.1	44.83	37.4	0.255186	6.37903	TRINITY_DN21007_c0_g1	mitochondrial import inner membrane translocase evidence Inferred from Electronic Annotation
2991	Smp_213240.1	85.48	71.47	0.254983	7.30332	TRINITY_DN18038_c0_g1; TRINITY_DN18038_c0_g3	prolyl oligopeptidase with UniProtKB:W8GKU3 evidence Non-traceable Author Statemen
2993	Smp_172160.1	26.4	21.97	0.254425	5.62556	TRINITY_DN21924_c0_g1; TRINITY_DN22596_c0_g1	RNA polymerase associated protein LEO1 evidence Inferred from Electronic Annotation
2995	Smp_154500.1	15.7	13.02	0.252362	4.89336	TRINITY_DN17647_c0_g1	hypothetical protein evidence Inferred from Electronic Annotation
2996	Smp_041050.1	64.2	53.74	0.252277	6.89409	TRINITY_DN23087_c1_g1	nuclear receptor%2C subfamily 0%2C group B%2C member evidence Inferred from Electronic Annotation
2997	Smp_167150.1	124.36	104.27	0.251983	7.84317	TRINITY_DN17830_c0_g1	pre mRNA processing factor 19 evidence Inferred from Electronic Annotation
2998	Smp_179010.1	80.22	67.22	0.25164	7.21374	TRINITY_DN19556_c1_g1	exosome complex component RRP42 evidence Inferred from Electronic Annotation
2999	Smp_137540.1	56.74	47.52	0.250992	6.71781	TRINITY_DN21860_c0_g1; TRINITY_DN21956_c1_g2; TRINITY_DN22212_c4_g13	apoptosis inducing factor 1%2C mitochondrial evidence Inferred from Electronic Annotation
3000	Smp_055600.1	190.71	160.26	0.249537	8.45931	TRINITY_DN18743_c0_g1	protein lin 7 B evidence Inferred from Electronic Annotation
3001	Smp_124820.2	32.19	26.92	0.24945	5.90953	TRINITY_DN19933_c0_g2; TRINITY_DN19933_c0_g3	chromosome region maintenance protein evidence Inferred from Electronic Annotation
3002	Smp_028070.2	60.08	50.42	0.24837	6.8009	TRINITY_DN21070_c1_g13; TRINITY_DN21070_c1_g2; TRINITY_DN21691_c0_g1; TRINITY_DN21691_c0_g2	protein bicaudal evidence Inferred from Electronic Annotation
3003	Smp_093800.1	76.41	64.19	0.247869	7.14568	TRINITY_DN17969_c0_g2	tim21 protein evidence Inferred from Electronic Annotation
3005	Smp_087750.1	9.35	7.72	0.247231	4.17552	TRINITY_DN31380_c0_g1; TRINITY_DN9301_c0_g1	hypothetical protein evidence Inferred from Electronic Annotation
3007	Smp_103320.1	93.9	79.03	0.245867	7.44236	TRINITY_DN22623_c1_g1	nuclear migration protein nudc evidence Inferred from Electronic Annotation
3009	Smp_136320.1	71.74	60.35	0.245686	7.05626	TRINITY_DN11206_c0_g2; TRINITY_DN20290_c0_g3	GSK3 beta interaction protein evidence Inferred from Electronic Annotation
3010	Smp_057620.1	275.86	232.52	0.245611	8.9926	TRINITY_DN11686_c0_g1; TRINITY_DN13523_c0_g1; TRINITY_DN13523_c0_g2; TRINITY_DN13523_c0_g3; TRINITY_DN19717_c0_g1; TRINITY_DN23876_c4_g12; TRINITY_DN23876_c4_g2	polypeptide GalNAc transferase 6 evidence Inferred from Electronic Annotation
3011	Smp_058380.1	9.48	7.84	0.24552	4.19535	TRINITY_DN15916_c0_g1; TRINITY_DN33083_c1_g1; TRINITY_DN37310_c0_g1; TRINITY_DN5663_c0_g1	latrophilin 3%2C CRA g evidence Inferred from Electronic Annotation
3012	Smp_085180.1	40.16	33.72	0.245476	6.22651	TRINITY_DN16747_c0_g1	cathepsin B (C01 family) evidence Inferred from Electronic Annotation
3014	Smp_041190.2	37.52	31.52	0.24428	6.13011	TRINITY_DN18587_c4_g6; TRINITY_DN23555_c0_g1; TRINITY_DN23555_c0_g2	outer dense fiber protein 2 evidence Inferred from Electronic Annotation
3015	Smp_000990.1	11627.3	9817.39	0.244077	14.3884	TRINITY_DN10428_c0_g1; TRINITY_DN10593_c0_g1; TRINITY_DN20369_c0_g2; TRINITY_DN20369_c0_g3; TRINITY_DN20369_c0_g4; TRINITY_DN50663_c0_g1; TRINITY_DN54691_c0_g1	exocyst complex component 1 evidence Inferred from Electronic Annotation
[truncated: 3,430 more rows]
